# Supplementary material for: Comparative effect of metformin versus sulfonylureas with dementia and Parkinson’s disease risk in US patients over 50 with type 2 diabetes mellitus
Source: PubMed Central journal article supplement — BMJ Open Diabetes Res Care. 2022 Sep 15;10(5):e003036. doi: 10.1136/bmjdrc-2022-003036 (PMC9478804; doi:10.1136/bmjdrc-2022-003036), 2022-09-15
Supplement: bmjdrc-2022-003036supp001.pdf [file bmjdrc-2022-003036supp001.pdf]

SUPPORTING INFORMATION Newby 2022 Metformin versus sulfonylureas on Dementia and Parkinson's risk

**SUPPORTING INFORMATION: Comparative Effect of Metformin versus Sulfonylureas with Dementia and Parkinson's disease Risk in US patients over 50 with Type 2 Diabetes Mellitus**

SUPPORTING INFORMATION Newby 2022 Metformin versus sulfonylureas on Dementia and Parkinson's risk

## Contents

|                                                 |     |
|-------------------------------------------------|-----|
| Supplementary Methods .....                     | 3   |
| Primary and secondary outcome definitions ..... | 3   |
| Covariate definitions.....                      | 6   |
| Drug definitions .....                          | 94  |
| Covariate Balance plots.....                    | 95  |
| Unadjusted results.....                         | 106 |
| Kaplan–Meier plots.....                         | 108 |
| Sensitivity Analysis.....                       | 109 |
| Negative Control Outcomes.....                  | 111 |

## SUPPORTING INFORMATION Newby 2022 Metformin versus sulfonylureas on Dementia and Parkinson's risk

Supplementary Methods

Below are extra details regarding the methods for this paper:

Primary and secondary outcome definitions: The primary outcomes were diagnosis of all-cause dementia or PD using a combination of diagnosis and prescription records. Prescriptions of drugs were defined by standard concepts codes based on RxNorm nomenclature. Diagnosis of all-cause was defined as any diagnosis of dementia and/or drug prescription data for acetylcholinesterase inhibitors (donepezil, rivastigmine, galantamine, or tacrine) or N-methyl-D-aspartate (NMDA)-receptor antagonist memantine. Dementia due to drug or alcohol-induced dementia or dementia associated with HIV were not included in our definition of dementia in this study. For PD, diagnosis was defined using any diagnosis of PD and/or drug prescription data for drugs used to PD only with no other indications: carbidopa, levodopa, rasagiline, tolcapone, selegiline, safinamide, entacapone, apomorphine, benserazide and opicapone.

Dementia or PD cases had to have either:

- 1) a clinical diagnosis code of dementia or PD with at least two occurrences from either inpatient or outpatient records on separate days,
- 2) At least two prescriptions on separate days for anti-dementia or anti Parkinson's drugs
- 3) A clinical dementia or PD diagnosis code with a drug prescription
- 4) A clinical diagnosis or anti dementia drug prescription with a mild cognitive decline clinical diagnosis for dementia.

Negative control outcomes: Negative control outcomes are conditions believed to have no causal relationship with metformin or sulfonylurea drug class exposure and therefore assumed a priori to return a hazard ratio (HR) of 1.0 when their risk is compared between exposure cohorts in a pairwise comparison. A HR of a negative control outcome that differs from 1.0 represents an estimate of the residual error of the analysis that was unaccounted for by the analytic specification such as inverse probability treatment weighting. Below is the table showing the negative control outcome used in this work and the figure showing the results of each of the negative control outcome using the whole population.

Primary and secondary outcome definitions

Below are the concept ID, concept names for the primary (All-cause dementia, Parkinson's disease) and secondary outcomes (Alzheimer's disease, vascular dementia and mild cognitive impairment) used.

**Table S1: Concept codes for primary and secondary outcomes**

| Concept ID | Concept Name                                                         | Phenotype          |
|------------|----------------------------------------------------------------------|--------------------|
| 4182210    | Dementia                                                             | All Cause Dementia |
| 378419     | Alzheimer's disease                                                  | All Cause Dementia |
| 374888     | Dementia associated with another disease                             | All Cause Dementia |
| 43530666   | Dementia with behavioral disturbance                                 | All Cause Dementia |
| 375791     | Uncomplicated senile dementia                                        | All Cause Dementia |
| 37109056   | Vascular dementia without behavioral disturbance                     | All Cause Dementia |
| 4220313    | Primary degenerative dementia of the Alzheimer type, senile onset    | All Cause Dementia |
| 439276     | Uncomplicated arteriosclerotic dementia                              | All Cause Dementia |
| 37018688   | Vascular dementia with behavioral disturbance                        | All Cause Dementia |
| 380701     | Diffuse Lewy body disease                                            | All Cause Dementia |
| 379784     | Senile dementia with depression                                      | All Cause Dementia |
| 380986     | Senile dementia with delusion                                        | All Cause Dementia |
| 376085     | Uncomplicated presenile dementia                                     | All Cause Dementia |
| 4218017    | Primary degenerative dementia of the Alzheimer type, presenile onset | All Cause Dementia |
| 4043378    | Frontotemporal dementia                                              | All Cause Dementia |
| 374326     | Arteriosclerotic dementia with depression                            | All Cause Dementia |
| 376946     | Senile dementia with delirium                                        | All Cause Dementia |
| 4100252    | Arteriosclerotic dementia with paranoia                              | All Cause Dementia |
| 377527     | Presenile dementia with depression                                   | All Cause Dementia |
| 376094     | Arteriosclerotic dementia with delirium                              | All Cause Dementia |
| 443605     | Vascular dementia                                                    | All Cause Dementia |
| 378125     | Presenile dementia                                                   | All Cause Dementia |
| 381832     | Presenile dementia with delirium                                     | All Cause Dementia |

## SUPPORTING INFORMATION Newby 2022 Metformin versus sulfonylureas on Dementia and Parkinson's risk

|          |                                                                                       |                    |
|----------|---------------------------------------------------------------------------------------|--------------------|
| 4048875  | Senile dementia                                                                       | All Cause Dementia |
| 379778   | Multi-infarct dementia                                                                | All Cause Dementia |
| 4046090  | Mixed cortical and subcortical vascular dementia                                      | All Cause Dementia |
| 4196433  | Senile dementia of the Lewy body type                                                 | All Cause Dementia |
| 4278830  | Primary degenerative dementia of the Alzheimer type, senile onset, uncomplicated      | All Cause Dementia |
| 4047747  | Subcortical vascular dementia                                                         | All Cause Dementia |
| 4314734  | Dementia associated with Parkinson's Disease                                          | All Cause Dementia |
| 43530664 | Dementia of the Alzheimer type with behavioral disturbance                            | All Cause Dementia |
| 4019705  | Primary degenerative dementia of the Alzheimer type, presenile onset, with depression | All Cause Dementia |
| 37111242 | Delirium co-occurrent with dementia                                                   | All Cause Dementia |
| 4277444  | Primary degenerative dementia of the Alzheimer type, presenile onset, uncomplicated   | All Cause Dementia |
| 4046089  | Vascular dementia of acute onset                                                      | All Cause Dementia |
| 4101137  | Senile dementia with depressive or paranoid features                                  | All Cause Dementia |
| 43021816 | Mixed dementia                                                                        | All Cause Dementia |
| 441002   | Dementia of frontal lobe type                                                         | All Cause Dementia |
| 377254   | Multi-infarct dementia, uncomplicated                                                 | All Cause Dementia |
| 44782422 | Dementia due to Parkinson's disease                                                   | All Cause Dementia |
| 443864   | Multi-infarct dementia with depression                                                | All Cause Dementia |
| 4100250  | Senile dementia with paranoia                                                         | All Cause Dementia |
| 4187091  | Pseudodementia                                                                        | All Cause Dementia |
| 43020444 | Primary degenerative dementia                                                         | All Cause Dementia |
| 4307791  | Dementia paralytica juvenilis                                                         | All Cause Dementia |
| 443790   | Multi-infarct dementia with delusions                                                 | All Cause Dementia |
| 762704   | Moderate dementia                                                                     | All Cause Dementia |
| 4244346  | Dialysis dementia                                                                     | All Cause Dementia |
| 4159643  | Senile dementia with psychosis                                                        | All Cause Dementia |
| 40483103 | Dementia due to Huntington chorea                                                     | All Cause Dementia |
| 762497   | Mild dementia                                                                         | All Cause Dementia |
| 44782763 | Lewy body dementia with behavioral disturbance                                        | All Cause Dementia |
| 444091   | Multi-infarct dementia with delirium                                                  | All Cause Dementia |
| 4234089  | Subcortical leukoencephalopathy                                                       | All Cause Dementia |
| 765653   | Severe dementia                                                                       | All Cause Dementia |
| 4092747  | Cerebral degeneration presenting primarily with dementia                              | All Cause Dementia |
| 44782771 | Presenile dementia with delusions                                                     | All Cause Dementia |
| 44784521 | Post-traumatic dementia with behavioral change                                        | All Cause Dementia |
| 4046091  | Semantic dementia                                                                     | All Cause Dementia |
| 4044051  | Frontal lobe degeneration with motor neurone disease                                  | All Cause Dementia |
| 4097384  | Primary degenerative dementia of the Alzheimer type, senile onset, with depression    | All Cause Dementia |
| 4044050  | Frontotemporal degeneration                                                           | All Cause Dementia |
| 44784474 | Dementia associated with multiple sclerosis                                           | All Cause Dementia |
| 4098163  | Presenile dementia with paranoia                                                      | All Cause Dementia |
| 4041685  | Amyotrophic lateral sclerosis with dementia                                           | All Cause Dementia |
| 4043242  | Non-familial Alzheimer's disease of early onset                                       | All Cause Dementia |
| 4043243  | Familial Alzheimer's disease of late onset                                            | All Cause Dementia |
| 4043244  | Non-familial Alzheimer's disease of late onset                                        | All Cause Dementia |
| 4043377  | Focal Alzheimer's disease                                                             | All Cause Dementia |
| 4043379  | Progressive aphasia in Alzheimer's disease                                            | All Cause Dementia |
| 4047748  | Patchy dementia                                                                       | All Cause Dementia |
| 4167839  | Primary degenerative dementia of the Alzheimer type, senile onset, with delirium      | All Cause Dementia |
| 4180284  | Dementia due to Creutzfeldt Jakob disease                                             | All Cause Dementia |
| 4182539  | Primary degenerative dementia of the Alzheimer type, presenile onset, with delusions  | All Cause Dementia |
| 4204688  | Primary degenerative dementia of the Alzheimer type, senile onset, with delusions     | All Cause Dementia |
| 4265907  | Parkinson-dementia complex of Guam                                                    | All Cause Dementia |
| 4277746  | Primary degenerative dementia of the Alzheimer type, presenile onset, with delirium   | All Cause Dementia |
| 36717248 | Ischemic vascular dementia                                                            | All Cause Dementia |
| 37109222 | Hallucinations co-occurrent and due to late onset dementia                            | All Cause Dementia |
| 37110677 | Epilepsy co-occurrent and due to dementia                                             | All Cause Dementia |
| 37395562 | Multi-infarct dementia due to atherosclerosis                                         | All Cause Dementia |
| 37395572 | Alzheimer's disease co-occurrent with delirium                                        | All Cause Dementia |
| 37396752 | Right temporal lobar atrophy                                                          | All Cause Dementia |
| 37399020 | Behavioral variant of frontotemporal dementia                                         | All Cause Dementia |
| 44782710 | Dementia due to Pick's disease                                                        | All Cause Dementia |
| 44782726 | Delusions in Alzheimer's disease                                                      | All Cause Dementia |
| 44782727 | Depressed mood in Alzheimer's disease                                                 | All Cause Dementia |

## SUPPORTING INFORMATION Newby 2022 Metformin versus sulfonylureas on Dementia and Parkinson's risk

|          |                                                                                                |                       |
|----------|------------------------------------------------------------------------------------------------|-----------------------|
| 44784473 | Dementia associated with normal pressure hydrocephalus                                         | All Cause Dementia    |
| 44784620 | Altered behavior in Huntington's dementia                                                      | All Cause Dementia    |
| 42538857 | Subcortical dementia                                                                           | All Cause Dementia    |
| 37110513 | Dementia due to disorder of central nervous system                                             | All Cause Dementia    |
| 4150604  | Frontal lobe degeneration                                                                      | All Cause Dementia    |
| 36716797 | Dementia due to chromosomal anomaly                                                            | All Cause Dementia    |
| 37116469 | Dementia with Down syndrome                                                                    | All Cause Dementia    |
| 37117145 | Behavioral disturbance co-occurrent and due to late onset Alzheimer dementia                   | All Cause Dementia    |
| 45765480 | Frontotemporal dementia with parkinsonism-17                                                   | All Cause Dementia    |
| 44784559 | Dementia associated with neurosyphilis                                                         | All Cause Dementia    |
| 44784607 | Dementia associated with cerebral anoxia                                                       | All Cause Dementia    |
| 762578   | Primary degenerative dementia of the Alzheimer type, senile onset, with behavioral disturbance | All Cause Dementia    |
| 43020422 | Dementia due to Rett's syndrome                                                                | All Cause Dementia    |
| 44782559 | Dementia due to multiple sclerosis with altered behavior                                       | All Cause Dementia    |
| 44784643 | Altered behavior in Alzheimer's disease                                                        | All Cause Dementia    |
| 45765477 | GRN-related frontotemporal dementia                                                            | All Cause Dementia    |
| 36716795 | Dementia co-occurrent and due to neurocysticercosis                                            | All Cause Dementia    |
| 37109635 | Rapidly progressive dementia                                                                   | All Cause Dementia    |
| 701322   | memantine                                                                                      | Anti dementia drug    |
| 757627   | galantamine                                                                                    | Anti dementia drug    |
| 733523   | rivastigmine                                                                                   | Anti dementia drug    |
| 715997   | donepezil                                                                                      | Anti dementia drug    |
| 836654   | tacrine                                                                                        | Anti dementia drug    |
| 381270   | Parkinson's disease                                                                            | Parkinson's Disease   |
| 4314734  | Dementia associated with Parkinson's Disease                                                   | Parkinson's Disease   |
| 44782422 | Dementia due to Parkinson's disease                                                            | Parkinson's Disease   |
| 36713737 | Orthostatic hypotension co-occurrent and due to Parkinson's disease                            | Parkinson's Disease   |
| 37396747 | Autosomal dominant late onset Parkinson disease                                                | Parkinson's Disease   |
| 715710   | rasagiline                                                                                     | Anti parkinson's drug |
| 715727   | tolcapone                                                                                      | Anti parkinson's drug |
| 740560   | carbidopa                                                                                      | Anti parkinson's drug |
| 766209   | selegiline                                                                                     | Anti parkinson's drug |
| 782211   | entacapone                                                                                     | Anti parkinson's drug |
| 789578   | levodopa                                                                                       | Anti parkinson's drug |
| 837027   | apomorphine                                                                                    | Anti parkinson's drug |
| 1594333  | safinamide                                                                                     | Anti parkinson's drug |
| 19016463 | benserazide                                                                                    | Anti parkinson's drug |
| 40799013 | Opicapone                                                                                      | Anti parkinson's drug |
| 43527177 | etilevodopa                                                                                    | Anti parkinson's drug |
| 378419   | Alzheimer's disease                                                                            | Alzheimer's disease   |
| 4220313  | Primary degenerative dementia of the Alzheimer type, senile onset                              | Alzheimer's disease   |
| 4218017  | Primary degenerative dementia of the Alzheimer type, presenile onset                           | Alzheimer's disease   |
| 4278830  | Primary degenerative dementia of the Alzheimer type, senile onset, uncomplicated               | Alzheimer's disease   |
| 43530664 | Dementia of the Alzheimer type with behavioral disturbance                                     | Alzheimer's disease   |
| 4019705  | Primary degenerative dementia of the Alzheimer type, presenile onset, with depression          | Alzheimer's disease   |
| 4277444  | Primary degenerative dementia of the Alzheimer type, presenile onset, uncomplicated            | Alzheimer's disease   |
| 4097384  | Primary degenerative dementia of the Alzheimer type, senile onset, with depression             | Alzheimer's disease   |
| 4043243  | Familial Alzheimer's disease of late onset                                                     | Alzheimer's disease   |
| 44782432 | Early onset Alzheimer's disease with behavioral disturbance                                    | Alzheimer's disease   |
| 4043377  | Focal Alzheimer's disease                                                                      | Alzheimer's disease   |
| 37395572 | Alzheimer's disease co-occurrent with delirium                                                 | Alzheimer's disease   |
| 4043244  | Non-familial Alzheimer's disease of late onset                                                 | Alzheimer's disease   |
| 4043241  | Familial Alzheimer's disease of early onset                                                    | Alzheimer's disease   |
| 4182539  | Primary degenerative dementia of the Alzheimer type, presenile onset, with delusions           | Alzheimer's disease   |
| 4277746  | Primary degenerative dementia of the Alzheimer type, presenile onset, with delirium            | Alzheimer's disease   |
| 44782726 | Delusions in Alzheimer's disease                                                               | Alzheimer's disease   |
| 4204688  | Primary degenerative dementia of the Alzheimer type, senile onset, with delusions              | Alzheimer's disease   |
| 4043242  | Non-familial Alzheimer's disease of early onset                                                | Alzheimer's disease   |
| 44782727 | Depressed mood in Alzheimer's disease                                                          | Alzheimer's disease   |
| 4167839  | Primary degenerative dementia of the Alzheimer type, senile onset, with delirium               | Alzheimer's disease   |
| 4043379  | Progressive aphasia in Alzheimer's disease                                                     | Alzheimer's disease   |

## SUPPORTING INFORMATION Newby 2022 Metformin versus sulfonylureas on Dementia and Parkinson's risk

|          |                                                                                                |                           |
|----------|------------------------------------------------------------------------------------------------|---------------------------|
| 37117145 | Behavioral disturbance co-occurrent and due to late onset Alzheimer dementia                   | Alzheimer's disease       |
| 44784643 | Altered behavior in Alzheimer's disease                                                        | Alzheimer's disease       |
| 762578   | Primary degenerative dementia of the Alzheimer type, senile onset, with behavioral disturbance | Alzheimer's disease       |
| 439795   | Minimal cognitive impairment                                                                   | Mild Cognitive Impairment |
| 40482301 | Residual cognitive deficit as late effect of cerebrovascular accident                          | Mild Cognitive Impairment |
| 443432   | Impaired cognition                                                                             | Mild Cognitive Impairment |
| 4009705  | Age-related cognitive decline                                                                  | Mild Cognitive Impairment |
| 4304008  | Memory impairment                                                                              | Mild Cognitive Impairment |
| 4297400  | Mild cognitive disorder                                                                        | Mild Cognitive Impairment |
| 4206332  | Forgetful                                                                                      | Mild Cognitive Impairment |
| 4145069  | Transient memory loss                                                                          | Mild Cognitive Impairment |
| 4099961  | Mild memory disturbance                                                                        | Mild Cognitive Impairment |
| 4076654  | Memory lapses                                                                                  | Mild Cognitive Impairment |
| 37016192 | Cognitive deficit in attention                                                                 | Mild Cognitive Impairment |
| 45765899 | Moderate cognitive impairment                                                                  | Mild Cognitive Impairment |
| 44782725 | Cognitive changes due to organic disorder                                                      | Mild Cognitive Impairment |
| 42537141 | Impaired executive functioning                                                                 | Mild Cognitive Impairment |
| 4022572  | Disturbance of cognitive learning                                                              | Mild Cognitive Impairment |
| 4074319  | Minor memory lapses                                                                            | Mild Cognitive Impairment |
| 4166262  | Disturbance of memory for order of events                                                      | Mild Cognitive Impairment |
| 37110498 | Cognitive impairment co-occurrent and due to primary psychotic disorder                        | Mild Cognitive Impairment |
| 4005009  | Lack of thinking ability                                                                       | Mild Cognitive Impairment |
| 45765900 | Severe cognitive impairment                                                                    | Mild Cognitive Impairment |
| 42539256 | Cognitive deficit due to and following cerebrovascular disease                                 | Mild Cognitive Impairment |
| 37109056 | Vascular dementia without behavioral disturbance                                               | Vascular Dementia         |
| 439276   | Uncomplicated arteriosclerotic dementia                                                        | Vascular Dementia         |
| 37018688 | Vascular dementia with behavioral disturbance                                                  | Vascular Dementia         |
| 374326   | Arteriosclerotic dementia with depression                                                      | Vascular Dementia         |
| 4100252  | Arteriosclerotic dementia with paranoia                                                        | Vascular Dementia         |
| 376094   | Arteriosclerotic dementia with delirium                                                        | Vascular Dementia         |
| 443605   | Vascular dementia                                                                              | Vascular Dementia         |
| 379778   | Multi-infarct dementia                                                                         | Vascular Dementia         |
| 4046090  | Mixed cortical and subcortical vascular dementia                                               | Vascular Dementia         |
| 4047747  | Subcortical vascular dementia                                                                  | Vascular Dementia         |
| 4046089  | Vascular dementia of acute onset                                                               | Vascular Dementia         |
| 377254   | Multi-infarct dementia, uncomplicated                                                          | Vascular Dementia         |
| 443864   | Multi-infarct dementia with depression                                                         | Vascular Dementia         |
| 443790   | Multi-infarct dementia with delusions                                                          | Vascular Dementia         |
| 444091   | Multi-infarct dementia with delirium                                                           | Vascular Dementia         |
| 4045742  | Multi-infarct state                                                                            | Vascular Dementia         |
| 36717248 | Ischemic vascular dementia                                                                     | Vascular Dementia         |
| 37395562 | Multi-infarct dementia due to atherosclerosis                                                  | Vascular Dementia         |
| 42538857 | Subcortical dementia                                                                           | Vascular Dementia         |

**Covariate definitions**

Below is a description of the covariates used and a table defining the covariate disease and prescription phenotypes used.

We use 33 covariates to generate our propensity score:

- Age
- Gender
- BMI
- Ethnicity
- Smoking status
- Health care utilization in outpatient records
- First prescription year
- US region
- Lab measurements
  - Hb1Ac
  - eGFR
- Co morbidities
  - Angina
  - hypertension
  - COPD

SUPPORTING INFORMATION Newby 2022 Metformin versus sulfonylureas on Dementia and Parkinson's risk

- CKD diagnosis
- CKD stage
- stroke
- heart attack
- heart failure
- atrial fibrillation
- coronary heart disease
- substance abuse
- high cholesterol
- head injury
- arthritis
- psychiatric disorders
- peripheral arterial disease
- eye disease
- cancer
- Other prescription drugs
  - ACE inhibitors
  - glucocorticoids
  - nonsteroidal anti-inflammatory drugs (NSAIDs)
  - beta-2 agonists,
  - diuretics
  - angiotensin receptor blockers (ARBs)

**Table S2: Concept codes for disease and prescription covariates used for generation of propensity scores for inverse probability treatment weighting (IPTW)**

| Concept ID | Concept Name                                                                    | Phenotype |
|------------|---------------------------------------------------------------------------------|-----------|
| 43531588   | Angina associated with type 2 diabetes mellitus                                 | Angina    |
| 36712984   | Angina co-occurrent and due to arteriosclerosis of coronary artery bypass graft | Angina    |
| 36712983   | Angina co-occurrent and due to coronary arteriosclerosis                        | Angina    |
| 36712982   | Unstable angina co-occurrent and due to coronary arteriosclerosis               | Angina    |
| 4324893    | Typical angina                                                                  | Angina    |
| 4310270    | Angina, class III                                                               | Angina    |
| 4264145    | Angina, class I                                                                 | Angina    |
| 4262446    | Nocturnal angina                                                                | Angina    |
| 4231426    | Angina, class IV                                                                | Angina    |
| 4201629    | Refractory angina                                                               | Angina    |
| 4198141    | Post infarct angina                                                             | Angina    |
| 4184827    | Angina, class II                                                                | Angina    |
| 4161974    | Recurrent angina after percutaneous transluminal coronary angioplasty           | Angina    |
| 4161973    | Progressive angina                                                              | Angina    |
| 4161457    | Recurrent angina after coronary artery bypass graft                             | Angina    |
| 4161456    | Recurrent angina after coronary stent placement                                 | Angina    |
| 4155963    | Atypical angina                                                                 | Angina    |
| 4155009    | Recurrent angina after directional coronary atherectomy                         | Angina    |
| 4119942    | Stable angina                                                                   | Angina    |
| 4119455    | New onset angina                                                                | Angina    |
| 4116486    | Exercise-induced angina                                                         | Angina    |
| 4108670    | Acute coronary insufficiency                                                    | Angina    |
| 4078531    | Status anginosus                                                                | Angina    |
| 4068938    | Syncope anginosa                                                                | Angina    |
| 321318     | Angina pectoris                                                                 | Angina    |
| 315832     | Angina decubitus                                                                | Angina    |
| 315830     | Prinzmetal angina                                                               | Angina    |
| 315296     | Preinfarction syndrome                                                          | Angina    |
| 77670      | Chest pain                                                                      | Angina    |
| 4079750    | Osteoarthritis of knee                                                          | Arthritis |
| 80180      | Osteoarthritis                                                                  | Arthritis |
| 80809      | Rheumatoid arthritis                                                            | Arthritis |
| 4324765    | Arthropathy of knee joint                                                       | Arthritis |
| 72993      | Localized, primary osteoarthritis                                               | Arthritis |
| 72990      | Localized osteoarthritis uncertain if primary OR secondary                      | Arthritis |
| 75617      | Degenerative joint disease involving multiple joints                            | Arthritis |
| 4079749    | Osteoarthritis of hip                                                           | Arthritis |
| 4035439    | Idiopathic osteoarthritis                                                       | Arthritis |
| 73840      | Localized, primary osteoarthritis of the shoulder region                        | Arthritis |

## SUPPORTING INFORMATION Newby 2022 Metformin versus sulfonylureas on Dementia and Parkinson's risk

|          |                                                                           |           |
|----------|---------------------------------------------------------------------------|-----------|
| 4208390  | Inflammation of sacroiliac joint                                          | Arthritis |
| 434123   | Primary localized osteoarthritis of pelvic region                         | Arthritis |
| 74125    | Inflammatory polyarthropathy                                              | Arthritis |
| 75036    | Localized, primary osteoarthritis of the hand                             | Arthritis |
| 4035611  | Seropositive rheumatoid arthritis                                         | Arthritis |
| 78505    | Localized, primary osteoarthritis of the ankle and/or foot                | Arthritis |
| 75897    | Polyarthropathy                                                           | Arthritis |
| 40483262 | Arthritis of shoulder region joint                                        | Arthritis |
| 76194    | Osteoarthritis involving multiple sites but not designated as generalized | Arthritis |
| 4219481  | Degenerative joint disease of ankle AND/OR foot                           | Arthritis |
| 4242103  | Osteoarthritis of the carpometacarpal joint of the thumb                  | Arthritis |
| 4083556  | Seronegative rheumatoid arthritis                                         | Arthritis |
| 4291025  | Arthritis                                                                 | Arthritis |
| 4117686  | Rheumatoid arthritis of multiple joints                                   | Arthritis |
| 4197476  | Localized, primary osteoarthritis of the wrist                            | Arthritis |
| 4346970  | Knee pyogenic arthritis                                                   | Arthritis |
| 4035441  | Osteoarthritis of wrist                                                   | Arthritis |
| 4144996  | Generalized osteoarthritis of the hand                                    | Arthritis |
| 44783205 | Post traumatic osteoarthritis                                             | Arthritis |
| 4159739  | Arthritis of knee                                                         | Arthritis |
| 4115161  | Rheumatoid arthritis - hand joint                                         | Arthritis |
| 80802    | Localized, secondary osteoarthritis                                       | Arthritis |
| 80183    | Localized, secondary osteoarthritis of the ankle and/or foot              | Arthritis |
| 4197477  | Localized, primary osteoarthritis of elbow                                | Arthritis |
| 4103372  | Primary localized osteoarthritis of multiple sites                        | Arthritis |
| 77631    | Localized, secondary osteoarthritis of the shoulder region                | Arthritis |
| 4083695  | Osteoarthritis of elbow                                                   | Arthritis |
| 4107913  | Myopathy due to rheumatoid arthritis                                      | Arthritis |
| 437064   | Chondrocalcinosis                                                         | Arthritis |
| 80804    | Allergic arthritis of multiple sites                                      | Arthritis |
| 4116151  | Rheumatoid arthritis of knee                                              | Arthritis |
| 4117687  | Rheumatoid arthritis - ankle and/or foot                                  | Arthritis |
| 74722    | Secondary localized osteoarthritis of pelvic region                       | Arthritis |
| 4116451  | Erosive osteoarthritis                                                    | Arthritis |
| 40490497 | Arthritis of hand                                                         | Arthritis |
| 4116441  | Rheumatoid arthritis of wrist                                             | Arthritis |
| 4286642  | Arthritis of hip                                                          | Arthritis |
| 4114439  | Rheumatoid arthritis of shoulder                                          | Arthritis |
| 46273178 | Osteoarthritis of hip due to dysplasia                                    | Arthritis |
| 4143463  | Localized osteoarthritis                                                  | Arthritis |
| 79904    | Localized, secondary osteoarthritis of the hand                           | Arthritis |
| 81097    | Felty's syndrome                                                          | Arthritis |
| 44782455 | Monoarthritis of knee                                                     | Arthritis |
| 40481943 | Secondary osteoarthritis                                                  | Arthritis |
| 4102493  | Polyneuropathy in rheumatoid arthritis                                    | Arthritis |
| 72994    | Jaccoud's syndrome                                                        | Arthritis |
| 80494    | Arthropathy associated with another disorder                              | Arthritis |
| 36713111 | Osteoarthritis of right knee joint                                        | Arthritis |
| 4115379  | Localized, primary osteoarthritis of the pelvic region and thigh          | Arthritis |
| 36717036 | Osteoarthritis of left knee joint                                         | Arthritis |
| 437629   | Chondrocalcinosis due to dicalcium phosphate crystals                     | Arthritis |
| 4116150  | Rheumatoid arthritis of hip                                               | Arthritis |
| 42872407 | Arthritis of wrist                                                        | Arthritis |
| 4116440  | Rheumatoid arthritis of elbow                                             | Arthritis |
| 4185423  | Chronic osteoarthritis                                                    | Arthritis |
| 4147779  | Osteoarthritis of multiple joints                                         | Arthritis |
| 73838    | Pyogenic arthritis of multiple sites                                      | Arthritis |
| 4205509  | Arthritis of elbow                                                        | Arthritis |
| 4323882  | Arthritis of acromioclavicular joint                                      | Arthritis |
| 4057588  | Arthritis associated with another disorder                                | Arthritis |
| 4065483  | Reactive arthropathy of knee                                              | Arthritis |
| 4160051  | Osteoarthritis of glenohumeral joint                                      | Arthritis |
| 4202790  | Osteoarthritis of foot joint                                              | Arthritis |
| 4083696  | Osteoarthritis of ankle                                                   | Arthritis |
| 4343918  | Osteoarthritis of finger joint                                            | Arthritis |
| 4035440  | Osteoarthritis of acromioclavicular joint                                 | Arthritis |
| 80806    | Climacteric arthritis of multiple sites                                   | Arthritis |
| 4025957  | Degenerative polyarthrititis                                              | Arthritis |
| 36713110 | Osteoarthritis of right hip joint                                         | Arthritis |
| 4066952  | Staphylococcal arthritis and polyarthrititis                              | Arthritis |



## SUPPORTING INFORMATION Newby 2022 Metformin versus sulfonylureas on Dementia and Parkinson's risk

|          |                                                                    |           |
|----------|--------------------------------------------------------------------|-----------|
| 36713109 | Osteoarthritis of left hip joint                                   | Arthritis |
| 4083686  | Apatite-associated destructive arthritis                           | Arthritis |
| 4094283  | Lower limb joint arthritis                                         | Arthritis |
| 4240648  | Arthritis of temporomandibular joint                               | Arthritis |
| 42872530 | Patellofemoral osteoarthritis                                      | Arthritis |
| 4176008  | Arthritis of joint of toe                                          | Arthritis |
| 36713103 | Osteoarthritis of joint of right shoulder region                   | Arthritis |
| 36713099 | Osteoarthritis of joint of left shoulder region                    | Arthritis |
| 45763782 | Primary osteoarthritis of ankle                                    | Arthritis |
| 4343919  | Osteoarthritis of toe joint                                        | Arthritis |
| 4269880  | Rheumatoid arteritis                                               | Arthritis |
| 4163270  | Seronegative arthritis                                             | Arthritis |
| 4083694  | Osteoarthritis of spinal facet joint                               | Arthritis |
| 4083698  | Osteoarthritis of subtalar joint                                   | Arthritis |
| 45765978 | Osteoarthritis of midfoot                                          | Arthritis |
| 37017534 | Osteoarthritis of lumbar spinal facet joint                        | Arthritis |
| 4114444  | Flare of rheumatoid arthritis                                      | Arthritis |
| 4179378  | Rheumatoid arthritis of foot                                       | Arthritis |
| 4067196  | Pneumococcal arthritis and polyarthritis                           | Arthritis |
| 4035442  | Osteoarthritis of first metatarsophalangeal joint                  | Arthritis |
| 4116445  | Rheumatoid arthritis of ankle                                      | Arthritis |
| 36712697 | Osteoarthritis of left foot                                        | Arthritis |
| 36713102 | Osteoarthritis of joint of right hand                              | Arthritis |
| 36712696 | Osteoarthritis of right foot                                       | Arthritis |
| 36717301 | Osteoarthritis of joint of left ankle                              | Arthritis |
| 4200420  | Spinal arthritis deformans                                         | Arthritis |
| 37108770 | Osteoarthritis of left patellofemoral joint                        | Arthritis |
| 37108614 | Arthritis of right ankle                                           | Arthritis |
| 37108613 | Arthritis of left foot                                             | Arthritis |
| 37117087 | Osteoarthritis of right patellofemoral joint                       | Arthritis |
| 36713104 | Osteoarthritis of joint of right wrist                             | Arthritis |
| 37108612 | Arthritis of left ankle                                            | Arthritis |
| 37117139 | Arthritis of right foot                                            | Arthritis |
| 36713098 | Osteoarthritis of joint of left hand                               | Arthritis |
| 36713100 | Osteoarthritis of joint of left wrist                              | Arthritis |
| 37395590 | Rheumatoid lung disease with rheumatoid arthritis                  | Arthritis |
| 37108602 | Arthritis of left glenohumeral joint                               | Arthritis |
| 45763783 | Secondary osteoarthritis of ankle                                  | Arthritis |
| 37109101 | Osteoarthritis of joint right ankle                                | Arthritis |
| 36713101 | Osteoarthritis of joint of right ankle and/or foot                 | Arthritis |
| 4346972  | Osteoarthritis of distal interphalangeal joint                     | Arthritis |
| 4150309  | Localized, secondary osteoarthritis of the pelvic region and thigh | Arthritis |
| 4189855  | Chronic arthropathy                                                | Arthritis |
| 4327181  | Interphalangeal osteoarthritis                                     | Arthritis |
| 4035744  | Secondary inflammatory arthritis                                   | Arthritis |
| 45763784 | Osteoarthritis of ankle secondary to trauma                        | Arthritis |
| 4003507  | Degenerative arthritis of temporomandibular joint                  | Arthritis |
| 37108603 | Arthritis of right glenohumeral joint                              | Arthritis |
| 36717302 | Osteoarthritis of joint of right elbow                             | Arthritis |
| 37108771 | Bilateral patellofemoral joint osteoarthritis                      | Arthritis |
| 45765981 | Osteoarthritis of midfoot secondary to inflammatory arthritis      | Arthritis |
| 4175623  | Periarthritis                                                      | Arthritis |
| 37108919 | Osteoarthritis of right subtalar joint                             | Arthritis |
| 36713091 | Bilateral osteoarthritis of first carpometacarpal joint            | Arthritis |
| 37108918 | Osteoarthritis of left subtalar joint                              | Arthritis |
| 37119224 | Arthritis of right elbow                                           | Arthritis |
| 4116442  | Rheumatoid arthritis of metacarpophalangeal joint                  | Arthritis |
| 4103516  | Rheumatoid carditis                                                | Arthritis |
| 4179092  | Acute polyarthritis                                                | Arthritis |
| 4110738  | Osteoarthritis deformans                                           | Arthritis |
| 37108605 | Arthritis of left elbow                                            | Arthritis |
| 37108714 | Seropositive rheumatoid arthritis of multiple joints               | Arthritis |
| 46273442 | Deformity of hand due to rheumatoid arthritis                      | Arthritis |
| 37018720 | Osteoarthritis of facet joint of thoracic spine                    | Arthritis |
| 4115050  | Rheumatoid arthritis of distal radioulnar joint                    | Arthritis |
| 4323570  | Secondary localized osteoarthrosis of multiple sites               | Arthritis |
| 4265764  | Polyarthritis associated with another disorder                     | Arthritis |
| 4266078  | Infective polyarthritis                                            | Arthritis |
| 4322886  | Arthritis of midtarsal joint                                       | Arthritis |
| 4311391  | Uveitis-rheumatoid arthritis syndrome                              | Arthritis |
| 4296152  | Pericarditis secondary to rheumatoid arthritis                     | Arthritis |

## SUPPORTING INFORMATION Newby 2022 Metformin versus sulfonylureas on Dementia and Parkinson's risk

|          |                                                                                       |                     |
|----------|---------------------------------------------------------------------------------------|---------------------|
| 4033630  | Arthritis of temporomandibular joint as part of polyarthritis                         | Arthritis           |
| 4162539  | Rheumatoid pneumoconiosis                                                             | Arthritis           |
| 37117136 | Osteoarthritis of first metatarsophalangeal joint of right foot                       | Arthritis           |
| 37108616 | Bilateral arthritis of feet                                                           | Arthritis           |
| 42537576 | Osteoarthritis of joint of left ankle and/or foot                                     | Arthritis           |
| 37117137 | Osteoarthritis of first metatarsophalangeal joint of left foot                        | Arthritis           |
| 4195770  | Idiopathic polyarthritis                                                              | Arthritis           |
| 4200987  | Extra-articular rheumatoid process                                                    | Arthritis           |
| 4178949  | Sequelae of inflammatory diseases                                                     | Arthritis           |
| 4179146  | Subtalar joint inflamed                                                               | Arthritis           |
| 762330   | Osteoarthritis of first carpometacarpal joint of right hand                           | Arthritis           |
| 762329   | Osteoarthritis of first carpometacarpal joint of left hand                            | Arthritis           |
| 42535499 | Osteoarthritis of joint of left elbow                                                 | Arthritis           |
| 45763809 | Osteoarthritis of talonavicular joint                                                 | Arthritis           |
| 42534860 | Osteoarthritis of right sacroiliac joint                                              | Arthritis           |
| 37108615 | Bilateral arthritis of ankle                                                          | Arthritis           |
| 42539214 | Osteoarthritis of left sacroiliac joint                                               | Arthritis           |
| 4173669  | Osteoarthritis of metacarpophalangeal joint                                           | Arthritis           |
| 4114440  | Rheumatoid arthritis of distal interphalangeal joint of finger                        | Arthritis           |
| 4114441  | Rheumatoid arthritis of first metatarsophalangeal joint                               | Arthritis           |
| 4116148  | Rheumatoid arthritis of sternoclavicular joint                                        | Arthritis           |
| 4116149  | Rheumatoid arthritis of acromioclavicular joint                                       | Arthritis           |
| 4116446  | Rheumatoid arthritis of subtalar joint                                                | Arthritis           |
| 760570   | Osteoarthritis of bilateral elbows                                                    | Arthritis           |
| 4147418  | Seropositive erosive rheumatoid arthritis                                             | Arthritis           |
| 759878   | Osteoarthritis of right acromioclavicular joint                                       | Arthritis           |
| 762486   | Localized osteoarthritis of wrist                                                     | Arthritis           |
| 4192894  | Exacerbation of osteoarthritis                                                        | Arthritis           |
| 36684455 | Osteoarthritis of bilateral hip joints                                                | Arthritis           |
| 37108590 | Rheumatoid arthritis of left knee                                                     | Arthritis           |
| 37108591 | Rheumatoid arthritis of right knee                                                    | Arthritis           |
| 37108600 | Osteoarthritis of right sternoclavicular joint                                        | Arthritis           |
| 37108601 | Osteoarthritis of right foot due to trauma                                            | Arthritis           |
| 37108608 | Bilateral arthritis of wrist                                                          | Arthritis           |
| 37108902 | Osteoarthritis of right temporomandibular joint                                       | Arthritis           |
| 37108903 | Osteoarthritis of left temporomandibular joint                                        | Arthritis           |
| 37108920 | Bilateral osteoarthritis of first metatarsophalangeal joint of feet                   | Arthritis           |
| 37109099 | Osteoarthritis of left ankle due to trauma                                            | Arthritis           |
| 37109100 | Osteoarthritis of right ankle due to trauma                                           | Arthritis           |
| 37117421 | Rheumatoid arthritis in remission                                                     | Arthritis           |
| 37395586 | Osteoarthritis of hip co-occurrent and due to dysplasia                               | Arthritis           |
| 4035756  | Osteoarthritis of metacarpophalangeal joint of finger                                 | Arthritis           |
| 42534834 | Rheumatoid arthritis of left hand                                                     | Arthritis           |
| 42534835 | Rheumatoid arthritis of left hip                                                      | Arthritis           |
| 42534836 | Rheumatoid arthritis of right hand                                                    | Arthritis           |
| 42534837 | Rheumatoid arthritis of right hip                                                     | Arthritis           |
| 42534839 | Deformity of left hand co-occurrent and due to rheumatoid arthritis                   | Arthritis           |
| 42534840 | Deformity of right foot co-occurrent and due to rheumatoid arthritis                  | Arthritis           |
| 42534841 | Deformity of left foot co-occurrent and due to rheumatoid arthritis                   | Arthritis           |
| 42534855 | Osteoarthritis of left sternoclavicular joint                                         | Arthritis           |
| 42534856 | Osteoarthritis of midtarsal joint of right foot                                       | Arthritis           |
| 42534857 | Osteoarthritis of midtarsal joint of left foot                                        | Arthritis           |
| 42534859 | Osteoarthritis of left foot due to trauma                                             | Arthritis           |
| 42534863 | Bilateral arthritis of elbows                                                         | Arthritis           |
| 42536657 | Rheumatoid arthritis without erosion                                                  | Arthritis           |
| 42539550 | Erosion of joint surface co-occurrent and due to rheumatoid arthritis                 | Arthritis           |
| 4035427  | Rheumatoid arthritis with multisystem involvement                                     | Arthritis           |
| 45763802 | Subtalar osteoarthritis secondary to inflammatory arthritis                           | Arthritis           |
| 45763804 | Osteoarthritis of ankle secondary to inflammatory arthritis                           | Arthritis           |
| 45763810 | Primary talonavicular osteoarthritis                                                  | Arthritis           |
| 45763815 | Talonavicular osteoarthritis secondary to inflammatory arthritis                      | Arthritis           |
| 45763817 | Primary osteoarthritis of first metatarsophalangeal joint                             | Arthritis           |
| 45763819 | Osteoarthritis of first metatarsophalangeal joint secondary to inflammatory arthritis | Arthritis           |
| 45765979 | Primary osteoarthritis of midfoot                                                     | Arthritis           |
| 4088352  | Sinus arrest with atrial escape                                                       | Atrial Fibrillation |
| 4124704  | Postoperative sinus node dysfunction                                                  | Atrial Fibrillation |
| 37395937 | Idiopathic neonatal atrial flutter                                                    | Atrial Fibrillation |
| 4102252  | Asymptomatic sinoatrial node dysfunction                                              | Atrial Fibrillation |
| 4120085  | Supraventricular tachycardia with functional bundle branch block                      | Atrial Fibrillation |
| 4088210  | Sinus arrest with junctional escape                                                   | Atrial Fibrillation |

## SUPPORTING INFORMATION Newby 2022 Metformin versus sulfonylureas on Dementia and Parkinson's risk

|          |                                                        |                     |
|----------|--------------------------------------------------------|---------------------|
| 4119604  | Paroxysmal familial ventricular fibrillation           | Atrial Fibrillation |
| 4098133  | Chronic ectopic atrial tachycardia                     | Atrial Fibrillation |
| 4119603  | Familial sick sinus syndrome                           | Atrial Fibrillation |
| 4119602  | Non-rheumatic atrial fibrillation                      | Atrial Fibrillation |
| 4028322  | Sinoatrial arrest with nodal/ventricular escape        | Atrial Fibrillation |
| 42872924 | Atrial standstill                                      | Atrial Fibrillation |
| 4120084  | Sinoatrial node tachycardia                            | Atrial Fibrillation |
| 4303256  | Sinoatrial nodal reentrant tachycardia                 | Atrial Fibrillation |
| 4124697  | Incessant atrial tachycardia                           | Atrial Fibrillation |
| 37395821 | Familial atrial fibrillation                           | Atrial Fibrillation |
| 4139517  | Transient cerebral ischemia due to atrial fibrillation | Atrial Fibrillation |
| 4325850  | Sustained ventricular fibrillation                     | Atrial Fibrillation |
| 4124696  | Re-entrant atrial tachycardia                          | Atrial Fibrillation |
| 4218739  | Junctional premature beats                             | Atrial Fibrillation |
| 44782789 | Nonsustained paroxysmal supraventricular tachycardia   | Atrial Fibrillation |
| 44782789 | Nonsustained paroxysmal supraventricular tachycardia   | Atrial Fibrillation |
| 4226399  | Fibrillation                                           | Atrial Fibrillation |
| 4190306  | Paroxysmal atrial tachycardia with block               | Atrial Fibrillation |
| 4277903  | Sinoatrial block                                       | Atrial Fibrillation |
| 4119601  | Lone atrial fibrillation                               | Atrial Fibrillation |
| 4169261  | Severe sinus bradycardia                               | Atrial Fibrillation |
| 4248028  | Supraventricular arrhythmia                            | Atrial Fibrillation |
| 4121479  | Ectopic atrial tachycardia                             | Atrial Fibrillation |
| 4137382  | Chronic atrial flutter                                 | Atrial Fibrillation |
| 4137382  | Chronic atrial flutter                                 | Atrial Fibrillation |
| 40480216 | Symptomatic sinus bradycardia                          | Atrial Fibrillation |
| 4065288  | EKG: atrial flutter                                    | Atrial Fibrillation |
| 45768480 | Longstanding persistent atrial fibrillation            | Atrial Fibrillation |
| 4176112  | Multifocal atrial tachycardia                          | Atrial Fibrillation |
| 4145510  | EKG: supraventricular tachycardia                      | Atrial Fibrillation |
| 4064452  | ECG: atrial fibrillation                               | Atrial Fibrillation |
| 4210313  | Sinus arrest                                           | Atrial Fibrillation |
| 315643   | Tachyarrhythmia                                        | Atrial Fibrillation |
| 4137871  | Inappropriate sinus tachycardia                        | Atrial Fibrillation |
| 4111700  | Ventricular fibrillation and flutter                   | Atrial Fibrillation |
| 4111700  | Ventricular fibrillation and flutter                   | Atrial Fibrillation |
| 4258998  | Persistent sinus bradycardia                           | Atrial Fibrillation |
| 4199501  | Rapid atrial fibrillation                              | Atrial Fibrillation |
| 4117112  | Controlled atrial fibrillation                         | Atrial Fibrillation |
| 4146580  | Paroxysmal atrial flutter                              | Atrial Fibrillation |
| 4146580  | Paroxysmal atrial flutter                              | Atrial Fibrillation |
| 4254116  | Tachycardia-bradycardia                                | Atrial Fibrillation |
| 4171269  | Atrial tachycardia                                     | Atrial Fibrillation |
| 44782442 | Atrial fibrillation with rapid ventricular response    | Atrial Fibrillation |
| 4108830  | Atrial paroxysmal tachycardia                          | Atrial Fibrillation |
| 4232691  | Permanent atrial fibrillation                          | Atrial Fibrillation |
| 4171683  | Sinus bradycardia                                      | Atrial Fibrillation |
| 4108832  | Atrial fibrillation and flutter                        | Atrial Fibrillation |
| 36712986 | Atypical atrial flutter                                | Atrial Fibrillation |
| 36712986 | Atypical atrial flutter                                | Atrial Fibrillation |
| 36712986 | Atypical atrial flutter                                | Atrial Fibrillation |
| 4068155  | Atrial arrhythmia                                      | Atrial Fibrillation |
| 36714994 | Typical atrial flutter                                 | Atrial Fibrillation |
| 36714994 | Typical atrial flutter                                 | Atrial Fibrillation |
| 36714994 | Typical atrial flutter                                 | Atrial Fibrillation |
| 437894   | Ventricular fibrillation                               | Atrial Fibrillation |
| 437894   | Ventricular fibrillation                               | Atrial Fibrillation |
| 437894   | Ventricular fibrillation                               | Atrial Fibrillation |
| 4232697  | Persistent atrial fibrillation                         | Atrial Fibrillation |
| 317893   | Paroxysmal supraventricular tachycardia                | Atrial Fibrillation |
| 317893   | Paroxysmal supraventricular tachycardia                | Atrial Fibrillation |
| 317893   | Paroxysmal supraventricular tachycardia                | Atrial Fibrillation |
| 4261842  | Sick sinus syndrome                                    | Atrial Fibrillation |
| 4275423  | Supraventricular tachycardia                           | Atrial Fibrillation |
| 317302   | Sinus node dysfunction                                 | Atrial Fibrillation |
| 314665   | Atrial flutter                                         | Atrial Fibrillation |
| 320536   | Electrocardiogram abnormal                             | Atrial Fibrillation |
| 4141360  | Chronic atrial fibrillation                            | Atrial Fibrillation |
| 4154290  | Paroxysmal atrial fibrillation                         | Atrial Fibrillation |
| 44784217 | Cardiac arrhythmia                                     | Atrial Fibrillation |
| 313217   | Atrial fibrillation                                    | Atrial Fibrillation |

## SUPPORTING INFORMATION Newby 2022 Metformin versus sulfonylureas on Dementia and Parkinson's risk

|          |                                                                     |        |
|----------|---------------------------------------------------------------------|--------|
| 137809   | Primary malignant neoplasm of female breast                         | Cancer |
| 200962   | Primary malignant neoplasm of prostate                              | Cancer |
| 4311499  | Primary malignant neoplasm of respiratory tract                     | Cancer |
| 78097    | Secondary malignant neoplasm of bone                                | Cancer |
| 436353   | Primary malignant neoplasm of upper outer quadrant of female breast | Cancer |
| 197500   | Primary malignant neoplasm of colon                                 | Cancer |
| 437233   | Multiple myeloma                                                    | Cancer |
| 196360   | Primary malignant neoplasm of bladder                               | Cancer |
| 261236   | Primary malignant neoplasm of upper lobe, bronchus or lung          | Cancer |
| 74582    | Primary malignant neoplasm of rectum                                | Cancer |
| 200051   | Primary malignant neoplasm of ovary                                 | Cancer |
| 432571   | Malignant lymphoma                                                  | Cancer |
| 133711   | Overlapping malignant neoplasm of female breast                     | Cancer |
| 198985   | Primary malignant neoplasm of kidney                                | Cancer |
| 133424   | Primary malignant neoplasm of thyroid gland                         | Cancer |
| 199754   | Primary malignant neoplasm of pancreas                              | Cancer |
| 198700   | Secondary malignant neoplasm of liver                               | Cancer |
| 254591   | Secondary malignant neoplasm of lung                                | Cancer |
| 138994   | Myelodysplastic syndrome                                            | Cancer |
| 4157454  | Primary malignant neoplasm of lower lobe, bronchus or lung          | Cancer |
| 140352   | Acute myeloid leukemia, disease                                     | Cancer |
| 380055   | Primary malignant neoplasm of brain                                 | Cancer |
| 44806773 | Secondary malignant neoplasm of liver and intrahepatic bile duct    | Cancer |
| 138379   | Chronic lymphoid leukemia, disease                                  | Cancer |
| 443392   | Malignant neoplastic disease                                        | Cancer |
| 378087   | Secondary malignant neoplasm of brain and spinal cord               | Cancer |
| 440956   | Primary malignant neoplasm of upper inner quadrant of female breast | Cancer |
| 194286   | Malignant neoplasm of corpus uteri, excluding isthmus               | Cancer |
| 136917   | Primary malignant neoplasm of skin of face                          | Cancer |
| 26638    | Primary malignant neoplasm of esophagus                             | Cancer |
| 438383   | Essential thrombocythemia                                           | Cancer |
| 432845   | Primary malignant neoplasm of central portion of female breast      | Cancer |
| 141232   | Malignant melanoma of skin                                          | Cancer |
| 436635   | Primary malignant neoplasm of sigmoid colon                         | Cancer |
| 134305   | Acute lymphoid leukemia                                             | Cancer |
| 441515   | Primary malignant neoplasm of lower outer quadrant of female breast | Cancer |
| 135214   | Polycythemia vera                                                   | Cancer |
| 4246451  | Secondary malignant neoplasm of brain                               | Cancer |
| 438699   | Primary malignant neoplasm of rectosigmoid junction                 | Cancer |
| 4300704  | Diffuse large B-cell lymphoma                                       | Cancer |
| 432851   | Secondary malignant neoplastic disease                              | Cancer |
| 139750   | Primary malignant neoplasm of skin                                  | Cancer |
| 196359   | Primary malignant neoplasm of uterine cervix                        | Cancer |
| 376647   | Primary malignant neoplasm of soft tissues                          | Cancer |
| 196044   | Primary malignant neoplasm of stomach                               | Cancer |
| 434298   | Secondary malignant neoplasm of lymph nodes of upper limb           | Cancer |
| 4038838  | Non-Hodgkin's lymphoma                                              | Cancer |
| 4082311  | B-cell chronic lymphocytic leukemia                                 | Cancer |
| 4157456  | Primary malignant neoplasm of skin head and neck                    | Cancer |
| 439392   | Primary malignant neoplasm                                          | Cancer |
| 318096   | Secondary malignant neoplasm of lymph node                          | Cancer |
| 258375   | Overlapping malignant neoplasm of bronchus and lung                 | Cancer |
| 196925   | Secondary malignant neoplasm of retroperitoneum and peritoneum      | Cancer |
| 440649   | Primary malignant neoplasm of head of pancreas                      | Cancer |
| 134603   | Chronic myeloid leukemia                                            | Cancer |
| 4038835  | Hodgkin's disease                                                   | Cancer |
| 4247719  | Primary malignant neoplasm of ascending colon                       | Cancer |
| 432263   | Primary malignant neoplasm of lower inner quadrant of female breast | Cancer |
| 433716   | Primary malignant neoplasm of testis                                | Cancer |
| 31509    | Primary malignant neoplasm of tonsil                                | Cancer |
| 201519   | Primary malignant neoplasm of liver                                 | Cancer |
| 132841   | Malignant lymphoma of lymph nodes of multiple sites                 | Cancer |
| 256633   | Primary malignant neoplasm of base of tongue                        | Cancer |
| 26052    | Primary malignant neoplasm of larynx                                | Cancer |
| 141816   | Acute lymphoid leukemia in remission                                | Cancer |
| 193138   | Primary malignant neoplasm of lower third of esophagus              | Cancer |
| 192568   | Secondary malignant neoplasm of intra-abdominal lymph nodes         | Cancer |
| 45770892 | Primary malignant neoplasm of uterus                                | Cancer |
| 133147   | Primary malignant neoplasm of skin of trunk                         | Cancer |
| 439751   | Secondary malignant neoplasm of intrathoracic lymph nodes           | Cancer |

## SUPPORTING INFORMATION Newby 2022 Metformin versus sulfonylureas on Dementia and Parkinson's risk

|          |                                                             |        |
|----------|-------------------------------------------------------------|--------|
| 432837   | Primary malignant neoplasm of cecum                         | Cancer |
| 4001171  | Liver cell carcinoma                                        | Cancer |
| 440658   | Primary malignant neoplasm of skin of upper limb            | Cancer |
| 4003185  | Refractory anemia                                           | Cancer |
| 437498   | Primary malignant neoplasm of tongue                        | Cancer |
| 438698   | Malignant lymphoma of lymph nodes of head, face AND/OR neck | Cancer |
| 442181   | Secondary malignant neoplasm of lymph nodes of neck         | Cancer |
| 4163261  | Malignant tumor of prostate                                 | Cancer |
| 257503   | Primary malignant neoplasm of main bronchus                 | Cancer |
| 80045    | Primary malignant neoplasm of anus                          | Cancer |
| 441233   | Primary malignant neoplasm of frontal lobe                  | Cancer |
| 256646   | Primary malignant neoplasm of middle lobe, bronchus or lung | Cancer |
| 4157457  | Malignant neoplasm of skin of trunk                         | Cancer |
| 260336   | Primary malignant neoplasm of glottis                       | Cancer |
| 432838   | Primary malignant neoplasm of cardia of stomach             | Cancer |
| 200349   | Malignant lymphoma of intra-abdominal lymph nodes           | Cancer |
| 4246127  | Malignant neoplasm of liver                                 | Cancer |
| 4158910  | Secondary malignant neoplasm of unknown site                | Cancer |
| 4091464  | Malignant neoplasm of nipple and areola of female breast    | Cancer |
| 46270513 | Secondary malignant neoplasm of right lung                  | Cancer |
| 4149840  | Nodular lymphoma                                            | Cancer |
| 76914    | Primary malignant neoplasm of bone                          | Cancer |
| 436348   | Primary malignant neoplasm of anal canal                    | Cancer |
| 133714   | Malignant melanoma of skin of trunk                         | Cancer |
| 40481901 | Mantle cell lymphoma                                        | Cancer |
| 4162253  | Primary malignant neoplasm of breast                        | Cancer |
| 73153    | Malignant neoplasm of lateral wall of urinary bladder       | Cancer |
| 317510   | Leukemia                                                    | Cancer |
| 436059   | Multiple myeloma in remission                               | Cancer |
| 432257   | Primary malignant neoplasm of transverse colon              | Cancer |
| 46273652 | Secondary malignant neoplasm of left lung                   | Cancer |
| 198104   | Primary malignant neoplasm of adrenal gland                 | Cancer |
| 193144   | Secondary malignant neoplasm of adrenal gland               | Cancer |
| 79740    | Overlapping malignant neoplasm of colon                     | Cancer |
| 433976   | Primary malignant neoplasm of temporal lobe                 | Cancer |
| 434588   | Primary malignant neoplasm of parotid gland                 | Cancer |
| 135204   | Mycosis fungoides of extranodal AND/OR solid organ site     | Cancer |
| 4112853  | Malignant tumor of breast                                   | Cancer |
| 72266    | Secondary malignant neoplasm of pleura                      | Cancer |
| 432833   | Primary malignant neoplasm of oropharynx                    | Cancer |
| 4312685  | Primary malignant neoplasm of skin of lower limb            | Cancer |
| 441800   | Primary malignant neoplasm of descending colon              | Cancer |
| 434293   | Primary malignant neoplasm of body of pancreas              | Cancer |
| 4314071  | Secondary malignant neoplasm of trunk                       | Cancer |
| 438701   | Disseminated malignancy of unknown primary                  | Cancer |
| 133713   | Malignant melanoma of skin of face                          | Cancer |
| 4001664  | Intrahepatic bile duct carcinoma                            | Cancer |
| 200959   | Secondary malignant neoplasm of intrapelvic lymph nodes     | Cancer |
| 135489   | Primary malignant neoplasm of male breast                   | Cancer |
| 4247350  | Primary malignant neoplasm of skin of ear                   | Cancer |
| 433143   | Primary malignant neoplasm of appendix                      | Cancer |
| 197806   | Primary malignant neoplasm of gallbladder                   | Cancer |
| 441805   | Primary malignant neoplasm of endocervix                    | Cancer |
| 438983   | Malignant melanoma of skin of upper limb                    | Cancer |
| 40490929 | Primary malignant neoplasm of intrahepatic bile duct        | Cancer |
| 440058   | Malignant lymphoma of extranodal AND/OR solid organ site    | Cancer |
| 132853   | Lymphoid leukemia                                           | Cancer |
| 434592   | B-cell lymphoma                                             | Cancer |
| 4092212  | Malignant tumor of supraglottis                             | Cancer |
| 136949   | Refractory anemia with excess blasts                        | Cancer |
| 439404   | Primary malignant neoplasm of oral cavity                   | Cancer |
| 197799   | Primary malignant neoplasm of the peritoneum                | Cancer |
| 4095592  | Malignant melanoma of scalp and/or neck                     | Cancer |
| 37018875 | Malignant neuroendocrine tumor                              | Cancer |
| 139757   | Malignant melanoma of skin of lower limb                    | Cancer |
| 4095168  | Malignant neoplasm, overlapping lesion of bladder           | Cancer |
| 200348   | Secondary malignant neoplasm of large intestine             | Cancer |
| 198091   | Primary malignant neoplasm of retroperitoneum               | Cancer |
| 195480   | Primary malignant neoplasm of renal pelvis                  | Cancer |
| 433149   | Primary malignant neoplasm of cerebellum                    | Cancer |
| 438086   | Primary malignant neoplasm of parietal lobe                 | Cancer |

## SUPPORTING INFORMATION Newby 2022 Metformin versus sulfonylureas on Dementia and Parkinson's risk

|          |                                                                                       |        |
|----------|---------------------------------------------------------------------------------------|--------|
| 136354   | Secondary malignant neoplasm of skin                                                  | Cancer |
| 135762   | Acute myeloid leukemia in remission                                                   | Cancer |
| 435484   | Primary malignant neoplasm of trigone of urinary bladder                              | Cancer |
| 28083    | Primary malignant neoplasm of pharynx                                                 | Cancer |
| 4153890  | Malignant melanoma of trunk                                                           | Cancer |
| 45767695 | Metastatic carcinoid tumor                                                            | Cancer |
| 201801   | Primary malignant neoplasm of fallopian tube                                          | Cancer |
| 133438   | Chronic lymphoid leukemia in remission                                                | Cancer |
| 40482859 | Malignant carcinoid tumor                                                             | Cancer |
| 200054   | Primary malignant neoplasm of ureter                                                  | Cancer |
| 432843   | Primary malignant neoplasm of tail of pancreas                                        | Cancer |
| 75756    | Malignant neoplasm of posterior wall of urinary bladder                               | Cancer |
| 438090   | Overlapping malignant neoplasm of rectum, anus and anal canal                         | Cancer |
| 40490918 | Marginal zone lymphoma                                                                | Cancer |
| 436344   | Primary malignant neoplasm of posterior wall of nasopharynx                           | Cancer |
| 135496   | Acute leukemia in remission                                                           | Cancer |
| 197508   | Malignant tumor of urinary bladder                                                    | Cancer |
| 373425   | Secondary malignant neoplasm of nervous system                                        | Cancer |
| 138708   | Acute leukemia                                                                        | Cancer |
| 434875   | Secondary malignant neoplasm of mediastinum                                           | Cancer |
| 195197   | Primary malignant neoplasm of vulva                                                   | Cancer |
| 435753   | Malignant lymphoma of intrathoracic lymph nodes                                       | Cancer |
| 438979   | Primary malignant neoplasm of hepatic flexure of colon                                | Cancer |
| 436640   | Primary malignant neoplasm of long bone of lower limb                                 | Cancer |
| 4147411  | Follicular non-Hodgkin's lymphoma                                                     | Cancer |
| 320342   | Secondary malignant neoplasm of lymph nodes of multiple sites                         | Cancer |
| 261514   | Primary malignant neoplasm of supraglottis                                            | Cancer |
| 320347   | Nodular lymphoma of lymph nodes of multiple sites                                     | Cancer |
| 192261   | Overlapping malignant neoplasm of pancreas                                            | Cancer |
| 192560   | Malignant lymphoma of lymph nodes of inguinal region AND/OR lower limb                | Cancer |
| 4091490  | Malignant neoplasm of cerebrum                                                        | Cancer |
| 4149851  | Malignant melanoma of upper limb                                                      | Cancer |
| 433709   | Primary malignant neoplasm of tonsillar fossa                                         | Cancer |
| 4155297  | Malignant neoplasm of skin                                                            | Cancer |
| 196048   | Primary malignant neoplasm of vagina                                                  | Cancer |
| 4312023  | Secondary malignant neoplasm of intra-abdominal organs                                | Cancer |
| 372849   | Overlapping malignant neoplasm of brain and other parts of the central nervous system | Cancer |
| 40487528 | Non-Hodgkin's lymphoma of extranodal site                                             | Cancer |
| 435755   | Primary malignant neoplasm of skin of eyelid                                          | Cancer |
| 133974   | Overlapping malignant neoplasm of skin                                                | Cancer |
| 4098597  | Waldenström macroglobulinemia                                                         | Cancer |
| 435752   | Primary malignant neoplasm of duodenum                                                | Cancer |
| 140666   | Myeloid leukemia                                                                      | Cancer |
| 434881   | Peripheral T-cell lymphoma                                                            | Cancer |
| 40486896 | Primary malignant neoplasm of extrahepatic bile duct                                  | Cancer |
| 197807   | Primary malignant neoplasm of soft tissues of abdomen                                 | Cancer |
| 442182   | Secondary malignant neoplasm of lymph nodes of lower limb                             | Cancer |
| 4178976  | Malignant tumor of thyroid gland                                                      | Cancer |
| 378696   | Primary malignant neoplasm of choroid                                                 | Cancer |
| 441521   | Malignant lymphoma of lymph nodes of axilla AND/OR upper limb                         | Cancer |
| 4157332  | Malignant neoplasm of female breast                                                   | Cancer |
| 441225   | Primary malignant neoplasm of ampulla of Vater                                        | Cancer |
| 132572   | Chronic myeloid leukemia in remission                                                 | Cancer |
| 4100425  | Merkel cell carcinoma                                                                 | Cancer |
| 439746   | Primary malignant neoplasm of hypopharynx                                             | Cancer |
| 436358   | Primary malignant neoplasm of exocervix                                               | Cancer |
| 438368   | Primary malignant neoplasm of thymus                                                  | Cancer |
| 4091467  | Malignant neoplasm of axillary tail of female breast                                  | Cancer |
| 4089777  | Malignant neoplasm of connective and soft tissue of hip and lower limb                | Cancer |
| 192836   | Primary malignant neoplasm of small intestine                                         | Cancer |
| 46271402 | Malignant carcinoid tumor of small intestine                                          | Cancer |
| 437805   | Primary malignant neoplasm of middle third of esophagus                               | Cancer |
| 4162860  | Primary malignant neoplasm of body of uterus                                          | Cancer |
| 25748    | Overlapping malignant neoplasm of esophagus                                           | Cancer |
| 193422   | Primary malignant neoplasm of body of stomach                                         | Cancer |
| 4180790  | Malignant tumor of colon                                                              | Cancer |
| 438367   | Primary malignant neoplasm of nasal cavity                                            | Cancer |
| 42709931 | Primary malignant neoplasm of dome of urinary bladder                                 | Cancer |
| 316356   | Hodgkin's disease of lymph nodes of multiple sites                                    | Cancer |

## SUPPORTING INFORMATION Newby 2022 Metformin versus sulfonylureas on Dementia and Parkinson's risk

|          |                                                                               |        |
|----------|-------------------------------------------------------------------------------|--------|
| 37018672 | Malignant poorly differentiated neuroendocrine carcinoma                      | Cancer |
| 4041800  | Burkitt's lymphoma                                                            | Cancer |
| 4038842  | Hodgkin's disease, nodular sclerosis                                          | Cancer |
| 4095312  | Malignant tumor of nasopharynx                                                | Cancer |
| 4118989  | Malignant tumor of soft tissue of head, face and neck                         | Cancer |
| 201231   | Malignant neoplasm of connective and soft tissue of pelvis                    | Cancer |
| 4147162  | Secondary malignant neoplasm of respiratory and digestive systems             | Cancer |
| 442131   | Primary malignant neoplasm of head                                            | Cancer |
| 441806   | Primary malignant neoplasm of brain stem                                      | Cancer |
| 4001329  | Follicular non-Hodgkin's lymphoma, mixed small cleaved cell and large cell    | Cancer |
| 4147164  | Malignant tumor of lymphoid hemopoietic and related tissue                    | Cancer |
| 78093    | Primary malignant neoplasm of pleura                                          | Cancer |
| 136915   | Primary malignant neoplasm of skin of lip                                     | Cancer |
| 4312698  | Primary malignant neoplasm of trunk                                           | Cancer |
| 76349    | Primary malignant neoplasm of urinary system                                  | Cancer |
| 4002357  | Follicular non-Hodgkin's lymphoma, small cleaved cell                         | Cancer |
| 443388   | Malignant tumor of lung                                                       | Cancer |
| 78987    | Secondary malignant neoplasm of urinary system                                | Cancer |
| 197803   | Overlapping malignant neoplasm of stomach                                     | Cancer |
| 200662   | Lymphosarcoma                                                                 | Cancer |
| 4040380  | Mycosis fungoides                                                             | Cancer |
| 4133599  | Chronic myelomonocytic leukemia                                               | Cancer |
| 40482893 | Extranodal marginal zone B-cell lymphoma of mucosa-associated lymphoid tissue | Cancer |
| 135750   | Primary malignant neoplasm of floor of mouth                                  | Cancer |
| 436923   | Primary malignant neoplasm of urinary bladder neck                            | Cancer |
| 133419   | Overlapping malignant melanoma of skin                                        | Cancer |
| 194589   | Primary malignant neoplasm of biliary tract                                   | Cancer |
| 440957   | Lymphosarcoma and reticulosarcoma                                             | Cancer |
| 22839    | Overlapping malignant neoplasm of larynx                                      | Cancer |
| 435190   | Primary malignant neoplasm of pyriform sinus                                  | Cancer |
| 315763   | Hodgkin's disease, nodular sclerosis of lymph nodes of multiple sites         | Cancer |
| 136950   | Myelodysplastic syndrome with isolated del(5q)                                | Cancer |
| 437798   | Primary malignant neoplasm of splenic flexure of colon                        | Cancer |
| 437818   | Hodgkin's disease of lymph nodes of head, face AND/OR neck                    | Cancer |
| 436920   | Reticulosarcoma                                                               | Cancer |
| 198371   | Secondary malignant neoplasm of small intestine                               | Cancer |
| 197506   | Malignant neoplasm of abdomen                                                 | Cancer |
| 433423   | Primary malignant neoplasm of pancreatic duct                                 | Cancer |
| 137800   | Primary malignant neoplasm of maxillary sinus                                 | Cancer |
| 198082   | Overlapping malignant neoplasm of body of uterus                              | Cancer |
| 199752   | Secondary malignant neoplasm of ovary                                         | Cancer |
| 135491   | Primary malignant neoplasm of spinal cord                                     | Cancer |
| 443387   | Malignant tumor of stomach                                                    | Cancer |
| 4003833  | Follicular non-Hodgkin's lymphoma, large cell                                 | Cancer |
| 379756   | Primary malignant neoplasm of mandible                                        | Cancer |
| 4160276  | Malignant neoplasm of genital structure                                       | Cancer |
| 4002356  | Diffuse non-Hodgkin's lymphoma, small cell                                    | Cancer |
| 438089   | Primary malignant neoplasm of pyloric antrum                                  | Cancer |
| 200052   | Primary malignant neoplasm of uterine adnexa                                  | Cancer |
| 140064   | Myelosclerosis with myeloid metaplasia                                        | Cancer |
| 132852   | Leukemic reticuloendotheliosis of extranodal AND/OR solid organ site          | Cancer |
| 435207   | Nodular lymphoma of lymph nodes of head, face and neck                        | Cancer |
| 200338   | Nodular lymphoma of intra-abdominal lymph nodes                               | Cancer |
| 198988   | Primary malignant neoplasm of pelvis                                          | Cancer |
| 40492482 | Squamous cell carcinoma of nose                                               | Cancer |
| 436357   | Primary malignant neoplasm of soft tissues of upper limb                      | Cancer |
| 432262   | Primary malignant neoplasm of trachea                                         | Cancer |
| 4095589  | Malignant melanoma of ear and/or external auditory canal                      | Cancer |
| 4003693  | Overlapping malignant neoplasm of brain                                       | Cancer |
| 377811   | Primary malignant neoplasm of retina                                          | Cancer |
| 436042   | Primary malignant neoplasm of anterior two-thirds of tongue                   | Cancer |
| 77812    | Malignant neoplasm of anterior wall of urinary bladder                        | Cancer |
| 4246802  | Primary malignant neoplasm of bone of skull                                   | Cancer |
| 438691   | Overlapping malignant neoplasm of oropharynx                                  | Cancer |
| 4003830  | Diffuse non-Hodgkin's lymphoma                                                | Cancer |
| 4246450  | Secondary malignant neoplasm of bone marrow                                   | Cancer |
| 80665    | Malignant neoplasm of thorax                                                  | Cancer |
| 432260   | Primary malignant neoplasm of upper third of esophagus                        | Cancer |
| 195483   | Primary malignant neoplasm of penis                                           | Cancer |

## SUPPORTING INFORMATION Newby 2022 Metformin versus sulfonylureas on Dementia and Parkinson's risk

|          |                                                                               |        |
|----------|-------------------------------------------------------------------------------|--------|
| 196049   | Primary malignant neoplasm of urethra                                         | Cancer |
| 436926   | Primary malignant neoplasm of cerebral meninges                               | Cancer |
| 434584   | Kaposi's sarcoma                                                              | Cancer |
| 200343   | Malignant lymphoma of spleen                                                  | Cancer |
| 443588   | Malignant neoplasm of brain                                                   | Cancer |
| 4082487  | Cutaneous/peripheral T-cell lymphoma                                          | Cancer |
| 443390   | Malignant tumor of rectum                                                     | Cancer |
| 4002497  | Acute promyelocytic leukemia, FAB M3                                          | Cancer |
| 4161028  | Adenocarcinoma of prostate                                                    | Cancer |
| 4216139  | Plasmacytoma                                                                  | Cancer |
| 134579   | Primary malignant neoplasm of buccal mucosa                                   | Cancer |
| 442158   | Hodgkin's disease, nodular sclerosis of lymph nodes of head, face AND/OR neck | Cancer |
| 4003186  | Refractory anemia with ringed sideroblasts                                    | Cancer |
| 373152   | Primary central nervous system lymphoma                                       | Cancer |
| 4095018  | Malignant neoplasm of connective and soft tissue of abdomen                   | Cancer |
| 201518   | Primary malignant neoplasm of lower limb                                      | Cancer |
| 4038845  | Hairy cell leukemia                                                           | Cancer |
| 136928   | Hodgkin's disease, nodular sclerosis of intrathoracic lymph nodes             | Cancer |
| 254282   | Primary malignant neoplasm of soft palate                                     | Cancer |
| 4092515  | Malignant neoplasm, overlapping lesion of cervix uteri                        | Cancer |
| 432559   | Primary malignant neoplasm of occipital lobe                                  | Cancer |
| 140057   | Chronic leukemia                                                              | Cancer |
| 196053   | Secondary malignant neoplasm of kidney                                        | Cancer |
| 75488    | Primary malignant neoplasm of vertebral column                                | Cancer |
| 4311480  | Primary malignant neoplasm of ileum                                           | Cancer |
| 140960   | Secondary malignant neoplasm of female breast                                 | Cancer |
| 25486    | Primary malignant neoplasm of islets of Langerhans                            | Cancer |
| 317801   | Primary malignant neoplasm of soft tissues of thorax                          | Cancer |
| 4334322  | Malignant neoplasm of lower respiratory tract                                 | Cancer |
| 72566    | Primary malignant neoplasm of pelvic bones, sacrum and coccyx                 | Cancer |
| 440655   | Malignant neoplasm of tongue, tip and lateral border                          | Cancer |
| 4247836  | Primary malignant neoplasm of major salivary gland                            | Cancer |
| 4187356  | Refractory cytopenia with multilineage dysplasia                              | Cancer |
| 195482   | Primary malignant neoplasm of intestinal tract                                | Cancer |
| 436043   | Overlapping malignant neoplasm of tongue                                      | Cancer |
| 135476   | Primary malignant neoplasm of thoracic esophagus                              | Cancer |
| 4181351  | Malignant tumor of ovary                                                      | Cancer |
| 81237    | Primary malignant neoplasm of upper limb bones and scapula                    | Cancer |
| 438693   | Primary malignant neoplasm of mediastinum                                     | Cancer |
| 4315806  | Secondary malignant neoplasm of retroperitoneum                               | Cancer |
| 440965   | Hodgkin's disease of intrathoracic lymph nodes                                | Cancer |
| 433704   | Primary malignant neoplasm of retromolar area                                 | Cancer |
| 4001328  | Diffuse non-Hodgkin's lymphoma, lymphoblastic                                 | Cancer |
| 197804   | Primary malignant neoplasm of intra-abdominal organs                          | Cancer |
| 4180793  | Malignant tumor of pancreas                                                   | Cancer |
| 4033891  | Mesothelioma                                                                  | Cancer |
| 432558   | Overlapping malignant neoplasm of nasopharynx                                 | Cancer |
| 378081   | Overlapping malignant neoplasm of soft tissues                                | Cancer |
| 37111619 | Malignant carcinoid tumor of bronchus                                         | Cancer |
| 4002498  | Overlapping malignant neoplasm of tonsil                                      | Cancer |
| 440047   | Primary malignant neoplasm of tonsillar pillar                                | Cancer |
| 197507   | Primary malignant neoplasm of male genital organ                              | Cancer |
| 4187355  | Refractory anemia with excess blasts-2                                        | Cancer |
| 81239    | Primary malignant neoplasm of upper limb                                      | Cancer |
| 135766   | Leukemia in remission                                                         | Cancer |
| 195195   | Malignant lymphoma of intrapelvic lymph nodes                                 | Cancer |
| 4111917  | Malignant mesothelioma of pleura                                              | Cancer |
| 4091465  | Malignant neoplasm of upper-outer quadrant of female breast                   | Cancer |
| 4312802  | Secondary malignant neoplasm of bladder                                       | Cancer |
| 76924    | Primary malignant neoplasm of ureteric orifice of urinary bladder             | Cancer |
| 442139   | Primary malignant neoplasm of bronchus                                        | Cancer |
| 436919   | Primary malignant neoplasm of unspecified site                                | Cancer |
| 441235   | Large cell anaplastic lymphoma                                                | Cancer |
| 40479608 | Mantle cell lymphoma of spleen                                                | Cancer |
| 4156114  | Primary malignant neoplasm of border of tongue                                | Cancer |
| 4092235  | Malignant neoplasm of connective and soft tissue of upper limb and shoulder   | Cancer |
| 36712834 | Acute lymphoid leukemia relapse                                               | Cancer |
| 200355   | Hodgkin's disease of intra-abdominal lymph nodes                              | Cancer |
| 438694   | Primary malignant neoplasm of hard palate                                     | Cancer |
| 433975   | Primary malignant neoplasm of cranial nerve                                   | Cancer |



## SUPPORTING INFORMATION Newby 2022 Metformin versus sulfonylureas on Dementia and Parkinson's risk

|          |                                                                            |        |
|----------|----------------------------------------------------------------------------|--------|
| 435751   | Primary malignant neoplasm of fundus of stomach                            | Cancer |
| 438982   | Primary malignant neoplasm of anterior portion of floor of mouth           | Cancer |
| 4116087  | Carcinoma of prostate                                                      | Cancer |
| 4099508  | Refractory anemia without sideroblasts, so stated                          | Cancer |
| 133154   | Plasma cell leukemia                                                       | Cancer |
| 374874   | Primary malignant neoplasm of eye                                          | Cancer |
| 37111620 | Malignant carcinoid tumor of colon                                         | Cancer |
| 253717   | Secondary malignant neoplasm of respiratory tract                          | Cancer |
| 4116228  | Papillary thyroid carcinoma                                                | Cancer |
| 4038839  | Hodgkin lymphoma, nodular lymphocyte predominance                          | Cancer |
| 4190771  | Refractory anemia with excess blasts-1                                     | Cancer |
| 196653   | Malignant tumor of kidney                                                  | Cancer |
| 4095304  | Malignant neoplasm of pituitary gland and craniopharyngeal duct            | Cancer |
| 440335   | Primary malignant neoplasm of lower gum                                    | Cancer |
| 198984   | Malignant tumor of cervix                                                  | Cancer |
| 4187850  | Primary malignant neoplasm of breast upper outer quadrant                  | Cancer |
| 4116235  | Malignant tumor of salivary gland                                          | Cancer |
| 432848   | Primary malignant neoplasm of cerebral ventricle                           | Cancer |
| 441224   | Primary malignant neoplasm of cervical esophagus                           | Cancer |
| 4177113  | Malignant tumor of vertebral column                                        | Cancer |
| 318697   | Lymphosarcoma of lymph nodes of multiple sites                             | Cancer |
| 4094876  | Malignant neoplasm of lower lobe, bronchus or lung                         | Cancer |
| 436913   | Primary malignant neoplasm of jejunum                                      | Cancer |
| 4091469  | Malignant neoplasm of nipple and areola of male breast                     | Cancer |
| 258981   | Kaposi's sarcoma of skin                                                   | Cancer |
| 434289   | Primary malignant neoplasm of lingual tonsil                               | Cancer |
| 4116071  | Carcinoma of breast                                                        | Cancer |
| 4246141  | Primary malignant neoplasm of pelvic bone                                  | Cancer |
| 4112738  | Adenocarcinoma of lung                                                     | Cancer |
| 197230   | Malignant neoplasm of uterus                                               | Cancer |
| 438977   | Primary malignant neoplasm of ribs and/or sternum and/or clavicle          | Cancer |
| 434587   | Primary malignant neoplasm of dorsal surface of tongue                     | Cancer |
| 198707   | Nodular lymphoma of lymph nodes of inguinal region and lower limb          | Cancer |
| 4040379  | Malignant mast cell tumor                                                  | Cancer |
| 434292   | Primary malignant neoplasm of lesser curvature of stomach                  | Cancer |
| 4237178  | Infiltrating duct carcinoma of breast                                      | Cancer |
| 440044   | Overlapping malignant neoplasm of hypopharynx                              | Cancer |
| 26361    | Primary malignant neoplasm of pineal gland                                 | Cancer |
| 135764   | Mycosis fungoides of lymph nodes of multiple sites                         | Cancer |
| 436045   | Malignant neoplasm of lip, oral cavity and pharynx                         | Cancer |
| 436352   | Primary malignant neoplasm of laryngeal cartilage                          | Cancer |
| 135768   | Acute monocytic leukemia                                                   | Cancer |
| 4181343  | Malignant tumor of esophagus                                               | Cancer |
| 4156113  | Malignant neoplasm of body of uterus                                       | Cancer |
| 196051   | Overlapping malignant neoplasm of female genital organs                    | Cancer |
| 4179980  | Malignant basal cell neoplasm of skin                                      | Cancer |
| 45765770 | Follicular non-Hodgkin's lymphoma diffuse follicle center sub-type grade 1 | Cancer |
| 139759   | Reticulosarcoma of lymph nodes of multiple sites                           | Cancer |
| 133420   | Primary malignant neoplasm of endocrine gland                              | Cancer |
| 201238   | Primary malignant neoplasm of female genital organ                         | Cancer |
| 140955   | Overlapping malignant neoplasm of floor of mouth                           | Cancer |
| 40481522 | Primary mediastinal (thymic) large B-cell lymphoma                         | Cancer |
| 37016170 | Merkel cell carcinoma of upper limb                                        | Cancer |
| 436054   | Primary malignant neoplasm of undescended testis                           | Cancer |
| 134290   | Primary malignant neoplasm of palate                                       | Cancer |
| 40483761 | Acute myeloid leukemia with myelodysplasia-related changes                 | Cancer |
| 437220   | Primary malignant neoplasm of ventral surface of tongue                    | Cancer |
| 4091336  | Malignant neoplasm of skin of upper limb and shoulder                      | Cancer |
| 40480128 | Malignant neoplasm of skin of face                                         | Cancer |
| 197808   | Primary malignant neoplasm of soft tissues of trunk                        | Cancer |
| 441809   | Primary malignant neoplasm of orbit                                        | Cancer |
| 4312691  | Primary malignant neoplasm of submaxillary gland                           | Cancer |
| 259748   | Primary malignant neoplasm of accessory sinus                              | Cancer |
| 432844   | Primary malignant neoplasm of anterior mediastinum                         | Cancer |
| 435485   | Primary malignant neoplasm of ill-defined site                             | Cancer |
| 198695   | Overlapping malignant neoplasm of biliary tract                            | Cancer |
| 4137687  | Acute promyelocytic leukemia, FAB M3, in remission                         | Cancer |
| 140967   | Myeloid sarcoma                                                            | Cancer |
| 4179720  | Primary malignant neoplasm of gastrointestinal tract                       | Cancer |
| 438692   | Primary malignant neoplasm of lateral wall of nasopharynx                  | Cancer |

## SUPPORTING INFORMATION Newby 2022 Metformin versus sulfonylureas on Dementia and Parkinson's risk

|          |                                                                                                  |        |
|----------|--------------------------------------------------------------------------------------------------|--------|
| 140950   | Primary malignant neoplasm of gum                                                                | Cancer |
| 4300118  | Squamous cell carcinoma                                                                          | Cancer |
| 4110880  | Clear cell carcinoma of kidney                                                                   | Cancer |
| 46271647 | Malignant carcinoid tumor of stomach                                                             | Cancer |
| 440345   | Primary malignant neoplasm of lateral wall of oropharynx                                         | Cancer |
| 4256776  | Adenocarcinoma of large intestine                                                                | Cancer |
| 133150   | Malignant neoplasm of skin of lower limb and hip                                                 | Cancer |
| 140046   | Primary malignant neoplasm of ethmoidal sinus                                                    | Cancer |
| 4041799  | SÅ@zary's disease                                                                                | Cancer |
| 434877   | Hodgkin's disease of lymph nodes of axilla AND/OR upper limb                                     | Cancer |
| 37018934 | Malignant carcinoid tumor of rectum                                                              | Cancer |
| 40486171 | Diffuse follicle center lymphoma                                                                 | Cancer |
| 4149847  | Carcinoma of colon                                                                               | Cancer |
| 37016171 | Merkel cell carcinoma of lower limb                                                              | Cancer |
| 132565   | Primary malignant neoplasm of vermilion border of lower lip                                      | Cancer |
| 437505   | Nodular lymphoma of lymph nodes of axilla and upper limb                                         | Cancer |
| 259755   | Primary malignant neoplasm of subglottis                                                         | Cancer |
| 4116241  | Squamous cell carcinoma of anal margin                                                           | Cancer |
| 132850   | Myeloid leukemia in remission                                                                    | Cancer |
| 443381   | Malignant tumor of sigmoid colon                                                                 | Cancer |
| 435492   | Nodular lymphoma of intrathoracic lymph nodes                                                    | Cancer |
| 40488896 | Anaplastic large cell lymphoma, ALK negative                                                     | Cancer |
| 438360   | Primary malignant neoplasm of vallecula                                                          | Cancer |
| 36715801 | Primary malignant neoplasm of placenta                                                           | Cancer |
| 437501   | Primary malignant neoplasm of labia majora                                                       | Cancer |
| 4151250  | Malignant neoplasm of upper lobe, bronchus or lung                                               | Cancer |
| 192255   | Primary malignant neoplasm of pylorus                                                            | Cancer |
| 4246137  | Primary malignant neoplasm of optic nerve                                                        | Cancer |
| 376918   | Primary malignant neoplasm of nervous system                                                     | Cancer |
| 439739   | Primary malignant neoplasm of posterior wall of oropharynx                                       | Cancer |
| 4095598  | Malignant neoplasm of skin of ear and external auditory canal                                    | Cancer |
| 194878   | Nodular lymphoma of extranodal AND/OR solid organ site                                           | Cancer |
| 436643   | Primary malignant neoplasm of anterior aspect of epiglottis                                      | Cancer |
| 73720    | Overlapping malignant neoplasm of urinary system                                                 | Cancer |
| 193971   | Primary malignant neoplasm of abdominal esophagus                                                | Cancer |
| 4184976  | Angioimmunoblastic T-cell lymphoma                                                               | Cancer |
| 434590   | Malignant melanoma of skin of eyelid                                                             | Cancer |
| 373151   | Primary malignant neoplasm of conjunctiva                                                        | Cancer |
| 435478   | Primary malignant neoplasm of upper gum                                                          | Cancer |
| 4003029  | Overlapping malignant neoplasm of vulva                                                          | Cancer |
| 4003188  | Adult T-cell leukemia/lymphoma                                                                   | Cancer |
| 4162276  | Malignant melanoma                                                                               | Cancer |
| 4189938  | Acute monocytic/monoblastic leukemia                                                             | Cancer |
| 443719   | Relapsing chronic myeloid leukemia                                                               | Cancer |
| 4299149  | Anaplastic large T-cell systemic malignant lymphoma                                              | Cancer |
| 438106   | Reticulosarcoma of lymph nodes of head, face and neck                                            | Cancer |
| 45765451 | Renal cell carcinoma                                                                             | Cancer |
| 437224   | Primary malignant neoplasm of greater curvature of stomach                                       | Cancer |
| 435474   | Primary malignant neoplasm of posterior hypopharyngeal wall                                      | Cancer |
| 4001172  | Hepatoblastoma                                                                                   | Cancer |
| 440344   | Primary malignant neoplasm of lateral portion of floor of mouth                                  | Cancer |
| 434577   | Primary malignant neoplasm of hypopharyngeal aspect of aryepiglottic fold                        | Cancer |
| 435754   | Malignant tumor of ascending colon                                                               | Cancer |
| 133969   | Primary malignant neoplasm of vermilion border of lip                                            | Cancer |
| 315481   | Burkitt's lymphoma of lymph nodes of multiple sites                                              | Cancer |
| 199747   | Overlapping malignant neoplasm of small intestine                                                | Cancer |
| 136056   | Chronic monocytic leukemia                                                                       | Cancer |
| 442163   | Hodgkin's disease, lymphocytic-histiocytic predominance of lymph nodes of head, face AND/OR neck | Cancer |
| 436652   | Hodgkin's disease of lymph nodes of inguinal region AND/OR lower limb                            | Cancer |
| 4038841  | Lymphocyte-rich classical Hodgkin lymphoma                                                       | Cancer |
| 4281030  | Secondary malignant neoplasm of right ovary                                                      | Cancer |
| 442132   | Primary malignant neoplasm of face                                                               | Cancer |
| 436922   | Primary malignant neoplasm of postcricoid region                                                 | Cancer |
| 4092380  | Malignant neoplasm of skin of nose                                                               | Cancer |
| 4001666  | Mesothelioma of peritoneum                                                                       | Cancer |
| 4247842  | Primary malignant neoplasm of myometrium                                                         | Cancer |
| 438980   | Overlapping malignant neoplasm of mediastinum and pleura                                         | Cancer |
| 4162115  | Primary malignant neoplasm of adrenal cortex                                                     | Cancer |
| 4281027  | Secondary malignant neoplasm of left ovary                                                       | Cancer |

## SUPPORTING INFORMATION Newby 2022 Metformin versus sulfonylureas on Dementia and Parkinson's risk

|          |                                                                                          |        |
|----------|------------------------------------------------------------------------------------------|--------|
| 4095320  | Malignant tumor of body of stomach                                                       | Cancer |
| 139753   | Primary malignant neoplasm of parathyroid gland                                          | Cancer |
| 40481357 | Large cell lymphoma of intrapelvic lymph nodes                                           | Cancer |
| 4038843  | Hodgkin's disease, mixed cellularity                                                     | Cancer |
| 315202   | Hodgkin's disease, mixed cellularity of lymph nodes of multiple sites                    | Cancer |
| 4178968  | Malignant tumor of larynx                                                                | Cancer |
| 321522   | Hodgkin's disease, lymphocytic-histiocytic predominance of lymph nodes of multiple sites | Cancer |
| 444224   | Overlapping malignant neoplasm of lip, oral cavity and pharynx                           | Cancer |
| 438380   | Lymphosarcoma of lymph nodes of head, face and neck                                      | Cancer |
| 442161   | Hodgkin's disease, mixed cellularity of lymph nodes of head, face AND/OR neck            | Cancer |
| 4247822  | Primary malignant neoplasm of central nervous system                                     | Cancer |
| 4092223  | Malignant neoplasm of orbital bone                                                       | Cancer |
| 200659   | Reticulosarcoma of intra-abdominal lymph nodes                                           | Cancer |
| 4092382  | Malignant neoplasm of scalp and/or skin of neck                                          | Cancer |
| 4312290  | Secondary malignant neoplasm of cerebral meninges                                        | Cancer |
| 134596   | Lymphoid leukemia in remission                                                           | Cancer |
| 138074   | Primary malignant neoplasm of vermilion border of upper lip                              | Cancer |
| 36713545 | Neuroendocrine carcinoma of appendix                                                     | Cancer |
| 436651   | Hodgkin's disease of extranodal AND/OR solid organ site                                  | Cancer |
| 434880   | Primary malignant neoplasm of short bone of lower limb                                   | Cancer |
| 442122   | Primary malignant neoplasm of paraganglion                                               | Cancer |
| 4153882  | Malignant neoplasm of soft tissue                                                        | Cancer |
| 443564   | Malignant neoplasm of bone                                                               | Cancer |
| 4158563  | Primary malignant neoplasm of breast upper inner quadrant                                | Cancer |
| 4095430  | Malignant neoplasm of rectum, rectosigmoid junction and anus                             | Cancer |
| 441223   | Primary malignant neoplasm of superior wall of nasopharynx                               | Cancer |
| 192847   | Primary malignant neoplasm of isthmus of uterus                                          | Cancer |
| 4094548  | Extramedullary plasmacytoma                                                              | Cancer |
| 441510   | Primary malignant neoplasm of parietal pleura                                            | Cancer |
| 201517   | Primary malignant neoplasm of urachus                                                    | Cancer |
| 374297   | Malignant neoplasm of eyeball excluding conjunctiva, cornea, retina and choroid          | Cancer |
| 4247238  | Primary malignant neoplasm of endometrium                                                | Cancer |
| 4110575  | Adenocarcinoma of rectum                                                                 | Cancer |
| 138377   | Mycosis fungoides of lymph nodes of head, face AND/OR neck                               | Cancer |
| 134295   | Primary malignant neoplasm of spinal meninges                                            | Cancer |
| 4092512  | Malignant neoplasm of upper-inner quadrant of female breast                              | Cancer |
| 4095748  | Malignant neoplasm of fundus of corpus uteri                                             | Cancer |
| 140048   | Malignant melanoma of skin of lip                                                        | Cancer |
| 316644   | Primary malignant neoplasm of heart                                                      | Cancer |
| 438370   | Primary malignant neoplasm of glans penis                                                | Cancer |
| 198088   | Nodular lymphoma of intrapelvic lymph nodes                                              | Cancer |
| 4110591  | Small cell carcinoma of lung                                                             | Cancer |
| 79758    | Primary malignant neoplasm of scrotum                                                    | Cancer |
| 4247348  | Primary malignant neoplasm of skin of breast                                             | Cancer |
| 314600   | Hodgkin's disease, nodular sclerosis of lymph nodes of axilla AND/OR upper limb          | Cancer |
| 138099   | Erythroleukemia, FAB M6                                                                  | Cancer |
| 4110705  | Squamous cell carcinoma of lung                                                          | Cancer |
| 193418   | Primary malignant neoplasm of spleen                                                     | Cancer |
| 4029188  | Primary cutaneous CD30+ large T-cell lymphoma                                            | Cancer |
| 443391   | Malignant tumor of cecum                                                                 | Cancer |
| 4115276  | Non-small cell lung cancer                                                               | Cancer |
| 253977   | Overlapping malignant neoplasm of accessory sinuses                                      | Cancer |
| 4178967  | Malignant tumor of head of pancreas                                                      | Cancer |
| 4244488  | Malignant melanoma of skin of nose                                                       | Cancer |
| 4162994  | Malignant neoplasm of skin of upper limb                                                 | Cancer |
| 4177115  | Malignant tumor of testis                                                                | Cancer |
| 4041104  | Malignant histiocytosis                                                                  | Cancer |
| 4113110  | Carcinoma of bladder                                                                     | Cancer |
| 4038846  | Langerhans cell histiocytosis, disseminated                                              | Cancer |
| 4091913  | Malignant mast cell tumors                                                               | Cancer |
| 4079683  | T-cell prolymphocytic leukemia                                                           | Cancer |
| 432574   | Diffuse non-Hodgkin's lymphoma, large cell                                               | Cancer |
| 4181339  | Malignant tumor of tonsil                                                                | Cancer |
| 4216427  | Refractory cytopenia with multilineage dysplasia and ringed sideroblasts                 | Cancer |
| 4091466  | Malignant neoplasm of lower-outer quadrant of female breast                              | Cancer |
| 4315805  | Secondary malignant neoplasm of peritoneum                                               | Cancer |
| 4180792  | Malignant tumor of rectosigmoid junction                                                 | Cancer |

## SUPPORTING INFORMATION Newby 2022 Metformin versus sulfonylureas on Dementia and Parkinson's risk

|          |                                                                                                    |        |
|----------|----------------------------------------------------------------------------------------------------|--------|
| 4121332  | Aleukemic leukemia                                                                                 | Cancer |
| 435193   | Reticulosarcoma of intrathoracic lymph nodes                                                       | Cancer |
| 321234   | Overlapping malignant neoplasm of heart, mediastinum and pleura                                    | Cancer |
| 437504   | Burkitt's tumor of lymph nodes of head, face AND/OR neck                                           | Cancer |
| 4188545  | Primary malignant neoplasm of breast lower outer quadrant                                          | Cancer |
| 198092   | Overlapping malignant neoplasm of retroperitoneum and peritoneum                                   | Cancer |
| 4002340  | Primary malignant neoplasm of meninges                                                             | Cancer |
| 134597   | Chronic leukemia in remission                                                                      | Cancer |
| 258369   | Primary malignant neoplasm of lung                                                                 | Cancer |
| 375490   | Primary malignant neoplasm of cornea                                                               | Cancer |
| 4094260  | Malignant neoplasm of peripheral nerves and autonomic nervous system                               | Cancer |
| 198374   | Nodular lymphoma of spleen                                                                         | Cancer |
| 321526   | Monocytic leukemia                                                                                 | Cancer |
| 136639   | Primary malignant neoplasm of sphenoidal sinus                                                     | Cancer |
| 438703   | Hodgkin's disease, lymphocytic-histiocytic predominance of lymph nodes of axilla AND/OR upper limb | Cancer |
| 372567   | Primary malignant neoplasm of lacrimal gland                                                       | Cancer |
| 4157459  | Carcinoma of pancreas                                                                              | Cancer |
| 375479   | Kaposi's sarcoma of soft tissue                                                                    | Cancer |
| 4178962  | Malignant tumor of tongue                                                                          | Cancer |
| 254583   | Kaposi's sarcoma of lung                                                                           | Cancer |
| 4091486  | Malignant neoplasm of overlapping lesion of urinary organs                                         | Cancer |
| 4092511  | Malignant neoplasm of central part of female breast                                                | Cancer |
| 135194   | Lymphosarcoma of intrathoracic lymph nodes                                                         | Cancer |
| 24296    | Primary malignant neoplasm of pituitary gland                                                      | Cancer |
| 4246808  | Primary malignant neoplasm of ciliary body                                                         | Cancer |
| 4092061  | Malignant tumor of pyloric antrum                                                                  | Cancer |
| 4092072  | Malignant tumor of body of pancreas                                                                | Cancer |
| 197228   | Lymphosarcoma of intra-abdominal lymph nodes                                                       | Cancer |
| 4155171  | Primary malignant neoplasm of lip                                                                  | Cancer |
| 195761   | Hodgkin's disease of intrapelvic lymph nodes                                                       | Cancer |
| 4181327  | Malignant tumor of gallbladder                                                                     | Cancer |
| 36717179 | Primary malignant neuroendocrine neoplasm of duodenum                                              | Cancer |
| 194593   | Mycosis fungoides of lymph nodes of inguinal region AND/OR lower limb                              | Cancer |
| 434302   | Hodgkin's disease, nodular sclerosis of extranodal AND/OR solid organ site                         | Cancer |
| 4162993  | Malignant neoplasm of skin of lower limb                                                           | Cancer |
| 4181332  | Malignant tumor of base of tongue                                                                  | Cancer |
| 4212994  | Extranodal NK/T-cell lymphoma, nasal type                                                          | Cancer |
| 4162876  | Malignant neoplasm of exocervix                                                                    | Cancer |
| 193434   | Hodgkin's disease, nodular sclerosis of intra-abdominal lymph nodes                                | Cancer |
| 196047   | Primary malignant neoplasm of parametrium                                                          | Cancer |
| 4079282  | Atypical chronic myeloid leukemia                                                                  | Cancer |
| 434285   | Primary malignant neoplasm of uvula                                                                | Cancer |
| 4181480  | Malignant neoplasm of frontal lobe                                                                 | Cancer |
| 4181477  | Malignant neoplasm of eye                                                                          | Cancer |
| 4048226  | Adenocarcinoma of endometrium                                                                      | Cancer |
| 435493   | Primary malignant neoplasm of short bone of upper limb                                             | Cancer |
| 79749    | Primary malignant neoplasm of body of penis                                                        | Cancer |
| 28356    | Overlapping malignant neoplasm of major salivary gland                                             | Cancer |
| 435758   | Burkitt's tumor of extranodal AND/OR solid organ site                                              | Cancer |
| 440351   | Hodgkin's disease, lymphocytic-histiocytic predominance of intrathoracic lymph nodes               | Cancer |
| 435487   | Primary malignant neoplasm of posterior mediastinum                                                | Cancer |
| 4092216  | Malignant neoplasm of upper lobe of lung                                                           | Cancer |
| 261808   | Primary malignant neoplasm of vestibule of mouth                                                   | Cancer |
| 25189    | Malignant tumor of oral cavity                                                                     | Cancer |
| 4097560  | Burkitt's lymphoma of intra-abdominal lymph nodes                                                  | Cancer |
| 443396   | Malignant tumor of large intestine                                                                 | Cancer |
| 4245460  | Hairy cell leukemia of spleen                                                                      | Cancer |
| 434291   | Primary malignant neoplasm of skin of neck                                                         | Cancer |
| 441802   | Primary malignant neoplasm of labia minora                                                         | Cancer |
| 4095749  | Malignant neoplasm of endometrium of corpus uteri                                                  | Cancer |
| 4301668  | Primary cutaneous follicular center B-cell lymphoma                                                | Cancer |
| 40481524 | Acute myeloid leukemia with t(9:11)(p22;q23); MLLT3-MLL                                            | Cancer |
| 4244051  | Malignant melanoma of skin of breast                                                               | Cancer |
| 37017321 | Malignant carcinoid tumor of kidney                                                                | Cancer |
| 4113111  | Transitional cell carcinoma of bladder                                                             | Cancer |
| 4002494  | Histiocytic sarcoma                                                                                | Cancer |

## SUPPORTING INFORMATION Newby 2022 Metformin versus sulfonylureas on Dementia and Parkinson's risk

|          |                                                                                                             |        |
|----------|-------------------------------------------------------------------------------------------------------------|--------|
| 201242   | Hodgkin's disease, lymphocytic-histiocytic predominance of intra-abdominal lymph nodes                      | Cancer |
| 252840   | Primary malignant neoplasm of upper respiratory tract                                                       | Cancer |
| 4123439  | Metastasis to head and neck lymph node                                                                      | Cancer |
| 4157333  | Malignant neoplasm of main bronchus                                                                         | Cancer |
| 442157   | Hodgkin's disease, nodular sclerosis of lymph nodes of inguinal region AND/OR lower limb                    | Cancer |
| 4095740  | Malignant neoplasm of lower-inner quadrant of female breast                                                 | Cancer |
| 438095   | Overlapping malignant neoplasm of eye and adnexa                                                            | Cancer |
| 4003834  | Malignant immunoproliferative disease                                                                       | Cancer |
| 4079686  | Acute megakaryoblastic leukemia                                                                             | Cancer |
| 444203   | Primary malignant neoplasm of articular cartilage                                                           | Cancer |
| 4180907  | Malignant neoplasm of temporal lobe                                                                         | Cancer |
| 4003684  | Overlapping malignant neoplasm of male breast                                                               | Cancer |
| 4080865  | Infiltrating lobular carcinoma of breast                                                                    | Cancer |
| 4041797  | Hodgkin's granuloma                                                                                         | Cancer |
| 45757107 | Malignant neoplastic disease in pregnancy                                                                   | Cancer |
| 443384   | Malignant tumor of transverse colon                                                                         | Cancer |
| 40492938 | Carcinoma of lung                                                                                           | Cancer |
| 196645   | Overlapping malignant neoplasm of male genital organs                                                       | Cancer |
| 40484156 | Malignant adenomatous neoplasm                                                                              | Cancer |
| 4089656  | Malignant tumor of lower third of esophagus                                                                 | Cancer |
| 4092211  | Malignant tumor of glottis                                                                                  | Cancer |
| 141524   | Mycosis fungoides of lymph nodes of axilla AND/OR upper limb                                                | Cancer |
| 4187851  | Primary malignant neoplasm of breast lower inner quadrant                                                   | Cancer |
| 27235    | Primary malignant neoplasm of carotid body                                                                  | Cancer |
| 136655   | Hodgkin's disease, mixed cellularity of intrathoracic lymph nodes                                           | Cancer |
| 377229   | Malignant neoplasm of auditory tube, middle ear and mastoid air cells                                       | Cancer |
| 4180794  | Malignant retroperitoneal tumor                                                                             | Cancer |
| 443382   | Malignant tumor of descending colon                                                                         | Cancer |
| 441803   | Lymphosarcoma of lymph nodes of axilla and upper limb                                                       | Cancer |
| 432254   | Primary malignant neoplasm of Waldeyer's ring                                                               | Cancer |
| 4202789  | Adenocarcinoma of uterus                                                                                    | Cancer |
| 4116073  | Malignant epithelial tumor of ovary                                                                         | Cancer |
| 4095755  | Malignant tumor of trigone of urinary bladder                                                               | Cancer |
| 442162   | Hodgkin's disease, lymphocytic-histiocytic predominance of lymph nodes of inguinal region AND/OR lower limb | Cancer |
| 442183   | Secondary malignant neoplasm of lymph nodes of head                                                         | Cancer |
| 4181338  | Malignant tumor of oropharynx                                                                               | Cancer |
| 4180784  | Malignant tumor of parotid gland                                                                            | Cancer |
| 200660   | Reticulosarcoma of lymph nodes of inguinal region and lower limb                                            | Cancer |
| 4162859  | Primary malignant neoplasm of adrenal medulla                                                               | Cancer |
| 132258   | Primary malignant neoplasm of frontal sinus                                                                 | Cancer |
| 40487143 | Malignant neoplasm of cerebellum                                                                            | Cancer |
| 318989   | Leukemic reticuloendotheliosis of lymph nodes of multiple sites                                             | Cancer |
| 4094856  | Malignant tumor of cardia                                                                                   | Cancer |
| 197810   | Malignant neoplasm of uterine adnexa                                                                        | Cancer |
| 4110871  | Endometrial carcinoma                                                                                       | Cancer |
| 4081043  | Adenocarcinoma of esophagus                                                                                 | Cancer |
| 4200514  | Adenocarcinoma of sigmoid colon                                                                             | Cancer |
| 4003184  | Acute panmyelosis with myelofibrosis                                                                        | Cancer |
| 4092513  | Malignant neoplasm, overlapping lesion of breast                                                            | Cancer |
| 193719   | Primary malignant neoplasm of spermatic cord                                                                | Cancer |
| 4150793  | Malignant tumor of lower labial mucosa                                                                      | Cancer |
| 443380   | Malignant tumor of thymus                                                                                   | Cancer |
| 4177107  | Malignant tumor of nasal cavity                                                                             | Cancer |
| 4180911  | Malignant tumor of anus                                                                                     | Cancer |
| 4095313  | Malignant tumor of anterior wall of nasopharynx                                                             | Cancer |
| 4041798  | Hodgkin's disease, lymphocytic depletion                                                                    | Cancer |
| 435494   | Hodgkin's paraganuloma of lymph nodes of head, face AND/OR neck                                             | Cancer |
| 4095432  | Malignant neoplasm of liver and intrahepatic bile ducts                                                     | Cancer |
| 133158   | Plasma cell leukemia in remission                                                                           | Cancer |
| 4181357  | Malignant tumor of renal pelvis                                                                             | Cancer |
| 4095442  | Malignant neoplasm of nasal cavities, middle ear and accessory sinuses                                      | Cancer |
| 4150398  | Malignant melanoma of back                                                                                  | Cancer |
| 4178959  | Malignant tumor of vulva                                                                                    | Cancer |
| 4178966  | Malignant tumor of ampulla of Vater                                                                         | Cancer |
| 4151263  | Malignant melanoma of lower limb                                                                            | Cancer |
| 434299   | Hodgkin's disease, mixed cellularity of lymph nodes of axilla AND/OR upper limb                             | Cancer |

## SUPPORTING INFORMATION Newby 2022 Metformin versus sulfonylureas on Dementia and Parkinson's risk

|          |                                                                           |        |
|----------|---------------------------------------------------------------------------|--------|
| 441241   | Reticulosarcoma of lymph nodes of axilla and upper limb                   | Cancer |
| 4157449  | Malignant neoplasm of endocervix                                          | Cancer |
| 40482847 | Juvenile myelomonocytic leukemia                                          | Cancer |
| 439738   | Primary malignant neoplasm of sublingual gland                            | Cancer |
| 4248802  | Adenocarcinoma of stomach                                                 | Cancer |
| 4311612  | Primary malignant neoplasm of sebaceous gland                             | Cancer |
| 440339   | Primary malignant neoplasm of prepuce                                     | Cancer |
| 40481908 | Metastatic malignant melanoma                                             | Cancer |
| 4089860  | Malignant melanoma of lip                                                 | Cancer |
| 140672   | Acute monocytic leukemia in remission                                     | Cancer |
| 4089756  | Malignant neoplasm of lower lobe of lung                                  | Cancer |
| 198702   | Lymphosarcoma of lymph nodes of inguinal region and lower limb            | Cancer |
| 4181481  | Malignant neoplasm of parietal lobe                                       | Cancer |
| 4095436  | Malignant tumor of tail of pancreas                                       | Cancer |
| 4173974  | B-cell prolymphocytic leukemia                                            | Cancer |
| 40482750 | Malignant neoplasm of ear                                                 | Cancer |
| 40488900 | Carcinoma of thyroid                                                      | Cancer |
| 313159   | Megakaryocytic leukemia                                                   | Cancer |
| 134879   | Mycosis fungoides of intrathoracic lymph nodes                            | Cancer |
| 4174593  | Squamous cell carcinoma of tongue                                         | Cancer |
| 4181328  | Malignant tumor of adrenal gland                                          | Cancer |
| 198085   | Kaposi's sarcoma of gastrointestinal tract                                | Cancer |
| 4094872  | Malignant neoplasm, overlapping lesion of accessory sinuses               | Cancer |
| 4115271  | Sarcoma of liver                                                          | Cancer |
| 438709   | Hodgkin's paraganuloma of intrathoracic lymph nodes                       | Cancer |
| 4111010  | Follicular thyroid carcinoma                                              | Cancer |
| 442173   | Secondary malignant neoplasm of spleen                                    | Cancer |
| 312846   | Kaposi's sarcoma of lymph nodes                                           | Cancer |
| 45768916 | Primary adenocarcinoma of lung                                            | Cancer |
| 40486655 | Malignant neoplasm of visceral pleura                                     | Cancer |
| 40492507 | Infiltrating duct carcinoma of female breast                              | Cancer |
| 258084   | Malignant neoplasm of bones of skull and face                             | Cancer |
| 140664   | S  zary's disease of lymph nodes of multiple sites                        | Cancer |
| 198704   | Hodgkin's disease of spleen                                               | Cancer |
| 4092524  | Malignant tumor of undescended testis                                     | Cancer |
| 438080   | Primary malignant neoplasm of anterior wall of nasopharynx                | Cancer |
| 4114222  | Malignant tumor of head and neck                                          | Cancer |
| 4178972  | Malignant tumor of ureter                                                 | Cancer |
| 40483374 | Hepatosplenic T-cell lymphoma                                             | Cancer |
| 443400   | Malignant tumor of peritoneum                                             | Cancer |
| 4208660  | Cholangiocarcinoma of biliary tract                                       | Cancer |
| 4141245  | Carcinomatosis                                                            | Cancer |
| 44808122 | Diffuse large B-cell lymphoma                                             | Cancer |
| 4311439  | Sarcoma                                                                   | Cancer |
| 4111028  | Adenocarcinoma of bladder                                                 | Cancer |
| 133710   | Overlapping malignant neoplasm of lip                                     | Cancer |
| 138351   | Primary malignant neoplasm of inner aspect of upper lip                   | Cancer |
| 40482784 | Malignant neoplasm of skeletal system                                     | Cancer |
| 197225   | Primary malignant neoplasm of clitoris                                    | Cancer |
| 4166588  | Epithelioma basal cell                                                    | Cancer |
| 4095741  | Malignant neoplasm of ectopic site of female breast                       | Cancer |
| 4177243  | Malignant tumor of pharynx                                                | Cancer |
| 192268   | Hodgkin's disease, mixed cellularity of intra-abdominal lymph nodes       | Cancer |
| 4247331  | Primary malignant neoplasm of intrathoracic organs                        | Cancer |
| 40486213 | Malignant neoplasm of broad ligament of uterus                            | Cancer |
| 4237016  | Squamous cell carcinoma of larynx                                         | Cancer |
| 440036   | Primary malignant neoplasm of junctional zone of tongue                   | Cancer |
| 443568   | Malignant neoplasm of gastrointestinal tract                              | Cancer |
| 4313056  | Primary malignant neoplasm of lacrimal drainage system                    | Cancer |
| 4198567  | HNPCC - hereditary nonpolyposis colon cancer                              | Cancer |
| 4092217  | Malignant neoplasm of middle lobe, bronchus or lung                       | Cancer |
| 132575   | Myeloid sarcoma in remission                                              | Cancer |
| 4038840  | Hodgkin's sarcoma                                                         | Cancer |
| 313980   | Hodgkin's disease, lymphocytic depletion of lymph nodes of multiple sites | Cancer |
| 4181345  | Malignant tumor of biliary tract                                          | Cancer |
| 441513   | Primary malignant neoplasm of axillary tail of breast                     | Cancer |
| 135759   | S  zary's disease of extranodal AND/OR solid organ site                   | Cancer |
| 443386   | Malignant tumor of duodenum                                               | Cancer |
| 40571980 | Glioblastoma multiforme                                                   | Cancer |
| 40490993 | Malignant neoplasm of mandible                                            | Cancer |

## SUPPORTING INFORMATION Newby 2022 Metformin versus sulfonylureas on Dementia and Parkinson's risk

|          |                                                                                               |        |
|----------|-----------------------------------------------------------------------------------------------|--------|
| 4181342  | Malignant tumor of hypopharynx                                                                | Cancer |
| 201813   | Mycosis fungoides of intra-abdominal lymph nodes                                              | Cancer |
| 4097283  | Malignant neoplasm of peripheral nerves of lower limb, including hip                          | Cancer |
| 196055   | Burkitt's lymphoma of lymph nodes of inguinal region and lower limb                           | Cancer |
| 136656   | Subacute lymphoid leukemia                                                                    | Cancer |
| 4157447  | Malignant neoplasm of male breast                                                             | Cancer |
| 4162118  | Malignant neoplasm of border of tongue                                                        | Cancer |
| 4310566  | Malignant neoplasm of skin of eyelid                                                          | Cancer |
| 4102373  | Neuroendocrine carcinoma                                                                      | Cancer |
| 4173963  | B-cell acute lymphoblastic leukemia                                                           | Cancer |
| 199760   | Hodgkin's disease, nodular sclerosis of intrapelvic lymph nodes                               | Cancer |
| 441525   | Malignant histiocytosis of lymph nodes of head, face AND/OR neck                              | Cancer |
| 80340    | Primary malignant neoplasm of epididymis                                                      | Cancer |
| 137512   | Malignant mast cell tumor of lymph nodes of multiple sites                                    | Cancer |
| 4095892  | Malignant neoplasm of peripheral nerves of head, face and neck                                | Cancer |
| 4180780  | Malignant tumor of anal canal                                                                 | Cancer |
| 4003027  | Overlapping malignant neoplasm of penis                                                       | Cancer |
| 45763891 | Adenocarcinoma of pancreas                                                                    | Cancer |
| 137219   | Primary malignant neoplasm of inner aspect of lower lip                                       | Cancer |
| 4003021  | Angiosarcoma of liver                                                                         | Cancer |
| 140663   | Hodgkin's paraganuloma of lymph nodes of multiple sites                                       | Cancer |
| 438373   | Hodgkin's disease, lymphocytic-histiocytic predominance of extranodal AND/OR solid organ site | Cancer |
| 4178969  | Malignant tumor of fallopian tube                                                             | Cancer |
| 433426   | Burkitt's tumor of lymph nodes of axilla AND/OR upper limb                                    | Cancer |
| 4177112  | Malignant tumor of trachea                                                                    | Cancer |
| 4001170  | Overlapping malignant neoplasm of palate                                                      | Cancer |
| 432256   | Primary malignant neoplasm of Meckel's diverticulum                                           | Cancer |
| 4033318  | Overlapping malignant neoplasm of bone and articular cartilage of limbs                       | Cancer |
| 37111618 | Malignant carcinoid tumor of thymus                                                           | Cancer |
| 4174444  | Glioblastoma multiforme of brain                                                              | Cancer |
| 4003175  | Primary malignant neoplasm of peripheral nerves of upper limb                                 | Cancer |
| 4247336  | Primary malignant neoplasm of middle ear                                                      | Cancer |
| 4110884  | Astrocytoma of brain                                                                          | Cancer |
| 140958   | Kaposi's sarcoma of palate                                                                    | Cancer |
| 442160   | Hodgkin's disease, mixed cellularity of lymph nodes of inguinal region AND/OR lower limb      | Cancer |
| 443397   | Malignant tumor of small intestine                                                            | Cancer |
| 73712    | Malignant tumor of vault of bladder                                                           | Cancer |
| 443383   | Malignant tumor of appendix                                                                   | Cancer |
| 135499   | Subacute myeloid leukemia                                                                     | Cancer |
| 4092077  | Malignant neoplasm of specified parts of peritoneum                                           | Cancer |
| 194876   | Hodgkin's disease, lymphocytic-histiocytic predominance of intrapelvic lymph nodes            | Cancer |
| 4110889  | Malignant tumor of acoustic vestibular nerve                                                  | Cancer |
| 4309545  | Squamous cell carcinoma of oropharynx                                                         | Cancer |
| 4315802  | Secondary malignant neoplasm of vertebral column                                              | Cancer |
| 4301666  | Subcutaneous panniculitis-like T-cell lymphoma                                                | Cancer |
| 193428   | Burkitt's lymphoma of intrapelvic lymph nodes                                                 | Cancer |
| 192265   | Reticulosarcoma of intrapelvic lymph nodes                                                    | Cancer |
| 132832   | Primary malignant neoplasm of inner aspect of lip                                             | Cancer |
| 4180791  | Malignant tumor of hepatic flexure                                                            | Cancer |
| 4119130  | Malignant lymphoma - small lymphocytic                                                        | Cancer |
| 4095756  | Malignant tumor of bladder neck                                                               | Cancer |
| 4184850  | Adenocarcinoma of cecum                                                                       | Cancer |
| 4110872  | Adenocarcinoma of cervix                                                                      | Cancer |
| 4138466  | Aleukemic leukemia in remission                                                               | Cancer |
| 201810   | Lymphosarcoma of intrapelvic lymph nodes                                                      | Cancer |
| 4117851  | Carcinoma of breast - upper, outer quadrant                                                   | Cancer |
| 4003675  | Primary malignant neoplasm of cloacogenic zone                                                | Cancer |
| 321815   | Malignant histiocytosis of lymph nodes of multiple sites                                      | Cancer |
| 4142582  | Malignant lymphoma in remission                                                               | Cancer |
| 4196262  | Metastasis from malignant tumor of prostate                                                   | Cancer |
| 4112314  | Carcinoma of cervix                                                                           | Cancer |
| 443389   | Malignant tumor of ill-defined site                                                           | Cancer |
| 4082627  | Enteropathy-associated T-cell lymphoma                                                        | Cancer |
| 443398   | Malignant tumor of intestine                                                                  | Cancer |
| 4264693  | Mast cell malignancy                                                                          | Cancer |
| 760936   | Plasma cell leukemia in relapse                                                               | Cancer |
| 133511   | Lethal midline granuloma                                                                      | Cancer |
| 4111011  | Medullary thyroid carcinoma                                                                   | Cancer |

## SUPPORTING INFORMATION Newby 2022 Metformin versus sulfonylureas on Dementia and Parkinson's risk

|          |                                                                                   |        |
|----------|-----------------------------------------------------------------------------------|--------|
| 4181479  | Malignant tumor of choroid                                                        | Cancer |
| 201240   | Secondary malignant neoplasm of female genital organ                              | Cancer |
| 4116080  | Squamous cell carcinoma of cervix                                                 | Cancer |
| 4177114  | Malignant tumor of vagina                                                         | Cancer |
| 4153887  | Carcinoma of lip                                                                  | Cancer |
| 4181347  | Malignant tumor of maxillary sinus                                                | Cancer |
| 315497   | Subacute leukemia                                                                 | Cancer |
| 255192   | Primary malignant neoplasm of commissure of lip                                   | Cancer |
| 4180908  | Malignant neoplasm of brainstem                                                   | Cancer |
| 4288751  | Heavy chain disease                                                               | Cancer |
| 4172359  | Carcinoma of larynx                                                               | Cancer |
| 40488919 | Malignant neoplasm of urinary organ                                               | Cancer |
| 4114339  | Seminoma of testis                                                                | Cancer |
| 4094866  | Malignant tumor of pancreatic duct                                                | Cancer |
| 4181488  | Malignant tumor of penis                                                          | Cancer |
| 442128   | Reticulosarcoma of spleen                                                         | Cancer |
| 442154   | Hodgkin's granuloma of lymph nodes of head, face AND/OR neck                      | Cancer |
| 4174443  | Malignant glioma of brain                                                         | Cancer |
| 4173976  | Mucosa-associated lymphoma                                                        | Cancer |
| 4092060  | Malignant tumor of middle third of esophagus                                      | Cancer |
| 4089769  | Malignant neoplasm of pelvic bones, sacrum and coccyx                             | Cancer |
| 4256774  | Transitional cell carcinoma of kidney                                             | Cancer |
| 433161   | Hodgkin's disease, lymphocytic depletion of lymph nodes of head, face AND/OR neck | Cancer |
| 4169598  | Malignant tumor of urinary system                                                 | Cancer |
| 4158473  | Carcinoma of base of tongue                                                       | Cancer |
| 4097561  | Burkitt's lymphoma of lymph nodes of axilla and upper limb                        | Cancer |
| 4180788  | Malignant tumor of tonsillar fossa                                                | Cancer |
| 4095450  | Malignant neoplasm of upper lobe bronchus                                         | Cancer |
| 4094262  | Malignant neoplasm of peripheral nerve of thorax                                  | Cancer |
| 4110857  | Liposarcoma                                                                       | Cancer |
| 4114343  | Carcinomatosis of peritoneal cavity                                               | Cancer |
| 42709755 | Malignant neoplasm of long bone of lower limb                                     | Cancer |
| 4146619  | Osteosarcoma of bone                                                              | Cancer |
| 4246029  | Primary malignant neoplasm of cauda equina                                        | Cancer |
| 4139358  | Erythroleukemia, FAB M6 in remission                                              | Cancer |
| 4301510  | Metastatic squamous cell carcinoma                                                | Cancer |
| 4177101  | Malignant tumor of floor of mouth                                                 | Cancer |
| 435203   | Hodgkin's disease, mixed cellularity of extranodal AND/OR solid organ site        | Cancer |
| 193157   | Hodgkin's disease, nodular sclerosis of spleen                                    | Cancer |
| 45773365 | Metastatic renal cell carcinoma                                                   | Cancer |
| 4162998  | Carcinoma of gallbladder                                                          | Cancer |
| 316649   | Hodgkin's sarcoma of lymph nodes of multiple sites                                | Cancer |
| 442252   | Secondary malignant neoplasm of axillary lymph nodes                              | Cancer |
| 4095142  | Malignant melanoma of scalp                                                       | Cancer |
| 4244166  | Malignant melanoma of skin of cheek                                               | Cancer |
| 22557    | Malignant tumor of submandibular gland                                            | Cancer |
| 4201621  | Metastasis from malignant tumor of lung                                           | Cancer |
| 4151260  | Carcinoma of the rectosigmoid junction                                            | Cancer |
| 4177234  | Malignant tumor of spinal cord                                                    | Cancer |
| 4180786  | Malignant tumor of buccal mucosa                                                  | Cancer |
| 4095319  | Malignant tumor of fundus of stomach                                              | Cancer |
| 40482829 | Leiomyosarcoma                                                                    | Cancer |
| 4174891  | Carcinoma of fallopian tube                                                       | Cancer |
| 313430   | Subacute monocytic leukemia                                                       | Cancer |
| 4311763  | Secondary malignant neoplasm of cerebrum                                          | Cancer |
| 200963   | Primary malignant neoplasm of pararethral glands                                  | Cancer |
| 40491001 | Malignant neoplasm of digestive system                                            | Cancer |
| 4003674  | Primary malignant neoplasm of branchial cleft                                     | Cancer |
| 432264   | Primary malignant neoplasm of broad ligament                                      | Cancer |
| 4170619  | Malignant melanoma of eye                                                         | Cancer |
| 4177232  | Malignant neoplasm of occipital lobe                                              | Cancer |
| 4178974  | Malignant neoplasm of cerebral meninges                                           | Cancer |
| 442168   | Mycosis fungoides of spleen                                                       | Cancer |
| 4003183  | T-cell lymphoma                                                                   | Cancer |
| 4092371  | Malignant melanoma of shoulder                                                    | Cancer |
| 440354   | Hodgkin's granuloma of intrathoracic lymph nodes                                  | Cancer |
| 4184849  | Adenocarcinoma of appendix                                                        | Cancer |
| 4144193  | Ewing's sarcoma of bone                                                           | Cancer |
| 4095593  | Malignant melanoma of neck                                                        | Cancer |
| 4184985  | Smoldering myeloma                                                                | Cancer |



## SUPPORTING INFORMATION Newby 2022 Metformin versus sulfonylureas on Dementia and Parkinson's risk

|          |                                                                         |        |
|----------|-------------------------------------------------------------------------|--------|
| 4097284  | Malignant neoplasm of peripheral nerve of pelvis                        | Cancer |
| 4114221  | Malignant tumor of unknown origin                                       | Cancer |
| 442152   | Hodgkin's paragranuloma of lymph nodes of axilla AND/OR upper limb      | Cancer |
| 439285   | Hodgkin's disease, lymphocytic depletion of intra-abdominal lymph nodes | Cancer |
| 40485978 | Carcinoma of uterus                                                     | Cancer |
| 4180910  | Malignant tumor of vocal cord                                           | Cancer |
| 4233629  | Widespread metastatic malignant neoplastic disease                      | Cancer |
| 141243   | Hodgkin's disease, lymphocytic depletion of intrathoracic lymph nodes   | Cancer |
| 4079288  | Follicular low grade B-cell lymphoma                                    | Cancer |
| 320337   | Hodgkin's granuloma of lymph nodes of multiple sites                    | Cancer |
| 4120310  | Nephroblastoma                                                          | Cancer |
| 4095437  | Malignant tumor of Islets of Langerhans                                 | Cancer |
| 45757101 | Malignant neoplastic disease in mother complicating childbirth          | Cancer |
| 4113108  | Squamous cell carcinoma of lip                                          | Cancer |
| 435495   | Malignant mast cell tumor of lymph nodes of head, face AND/OR neck      | Cancer |
| 4141255  | Malignant lymphoma - lymphoplasmacytic                                  | Cancer |
| 195201   | Lymphosarcoma of spleen                                                 | Cancer |
| 40486563 | Carcinoma of female breast                                              | Cancer |
| 4102133  | Transitional cell carcinoma of ureter                                   | Cancer |
| 4095145  | Malignant melanoma of lower leg                                         | Cancer |
| 4149850  | Malignant melanoma of head and neck                                     | Cancer |
| 40484128 | Oligodendroglioma                                                       | Cancer |
| 4138752  | Precursor B-cell acute lymphoblastic leukemia in remission              | Cancer |
| 439745   | Primary malignant neoplasm of salivary gland duct                       | Cancer |
| 4091768  | Burkitt's lymphoma of intrathoracic lymph nodes                         | Cancer |
| 4095294  | Malignant tumor of ciliary body                                         | Cancer |
| 441520   | Primary malignant neoplasm of round ligament of uterus                  | Cancer |
| 136930   | Megakaryocytic leukemia in remission                                    | Cancer |
| 4032870  | Malignant mesothelioma of pericardium                                   | Cancer |
| 4178977  | Malignant tumor of pineal gland                                         | Cancer |
| 4177098  | Malignant tumor of anterior two-thirds of tongue                        | Cancer |
| 4162997  | Carcinoma of esophagus                                                  | Cancer |
| 4112074  | Inflammatory carcinoma of breast                                        | Cancer |
| 194594   | Hodgkin's disease, mixed cellularity of intrapelvic lymph nodes         | Cancer |
| 4149844  | Tongue carcinoma                                                        | Cancer |
| 4247962  | Secondary malignant neoplasm of gastrointestinal tract                  | Cancer |
| 4177236  | Malignant tumor of pelvis                                               | Cancer |
| 4116084  | Squamous cell carcinoma of vulva                                        | Cancer |
| 4177230  | Malignant tumor of urethra                                              | Cancer |
| 4145870  | Metastatic adenocarcinoma of unknown origin                             | Cancer |
| 4181333  | Malignant tumor of major salivary gland                                 | Cancer |
| 193429   | Leukemic reticuloendotheliosis of intra-abdominal lymph nodes           | Cancer |
| 442134   | Primary malignant neoplasm of craniopharyngeal duct                     | Cancer |
| 40487046 | Carcinoma of vulva                                                      | Cancer |
| 4081044  | Squamous cell carcinoma of esophagus                                    | Cancer |
| 43530694 | Metastasis to liver from adenocarcinoma                                 | Cancer |
| 141814   | Letterer-Siwe disease of lymph nodes of multiple sites                  | Cancer |
| 4155299  | Carcinoma of stomach                                                    | Cancer |
| 4082460  | Large granular lymphocytic leukemia                                     | Cancer |
| 442095   | Leukemic reticuloendotheliosis of intrathoracic lymph nodes             | Cancer |
| 442169   | Mycosis fungoides of intrapelvic lymph nodes                            | Cancer |
| 4089866  | Malignant melanoma of forearm                                           | Cancer |
| 4177244  | Malignant tumor of female genital organ                                 | Cancer |
| 4333766  | Neuroblastoma                                                           | Cancer |
| 4149837  | Malignant tumor of lesser curve of stomach                              | Cancer |
| 198098   | Malignant histiocytosis of intra-abdominal lymph nodes                  | Cancer |
| 4180787  | Malignant tumor of hard palate                                          | Cancer |
| 4198446  | Metastasis from malignant tumor of breast                               | Cancer |
| 4145095  | Squamous cell carcinoma of mouth                                        | Cancer |
| 4095317  | Malignant tumor of pylorus                                              | Cancer |
| 4162116  | Malignant neoplasm of adrenal cortex                                    | Cancer |
| 36712981 | Adenocarcinoma of right lung                                            | Cancer |
| 4180789  | Malignant tumor of pyriform fossa                                       | Cancer |
| 4002496  | Mast cell leukemia                                                      | Cancer |
| 4114198  | Malignant tumor of olfactory tract                                      | Cancer |
| 4094855  | Malignant tumor of upper third of esophagus                             | Cancer |
| 4090226  | Malignant tumor of vestibule of mouth                                   | Cancer |
| 436362   | Letterer-Siwe disease of lymph nodes of head, face AND/OR neck          | Cancer |

## SUPPORTING INFORMATION Newby 2022 Metformin versus sulfonylureas on Dementia and Parkinson's risk

|          |                                                                                     |        |
|----------|-------------------------------------------------------------------------------------|--------|
| 4246125  | Primary malignant neoplasm of large intestine                                       | Cancer |
| 4141960  | Hormone refractory prostate cancer                                                  | Cancer |
| 4158909  | Tonsil carcinoma                                                                    | Cancer |
| 4308623  | Idiopathic hypereosinophilic syndrome                                               | Cancer |
| 4003028  | Primary malignant neoplasm of descended testis                                      | Cancer |
| 4094722  | Malignant tumor of posterior wall of nasopharynx                                    | Cancer |
| 4181484  | Malignant tumor of mediastinum                                                      | Cancer |
| 4247726  | Primary malignant neoplasm of bone marrow                                           | Cancer |
| 4091621  | Malignant neoplasm of peripheral nerve of abdomen                                   | Cancer |
| 40492385 | Leiomyosarcoma of uterus                                                            | Cancer |
| 4188544  | Malignant neoplasm of breast lower inner quadrant                                   | Cancer |
| 4094863  | Malignant tumor of Meckel's diverticulum                                            | Cancer |
| 4090224  | Malignant tumor of anterior floor of mouth                                          | Cancer |
| 4245916  | Malignant mast cell tumor of intra-abdominal lymph nodes                            | Cancer |
| 4112780  | Metastasis to brain of unknown primary                                              | Cancer |
| 4259972  | Indolent multiple myeloma                                                           | Cancer |
| 198381   | Hodgkin's disease, lymphocytic-histiocytic predominance of spleen                   | Cancer |
| 4313792  | Secondary malignant neoplasm of mediastinal lymph nodes                             | Cancer |
| 4179095  | Malignant tumor of face                                                             | Cancer |
| 4178965  | Malignant tumor of retromolar area                                                  | Cancer |
| 439293   | Burkitt's lymphoma of spleen                                                        | Cancer |
| 4177105  | Malignant tumor of extrahepatic bile duct                                           | Cancer |
| 4294435  | Primary cutaneous B-cell lymphoma                                                   | Cancer |
| 40481031 | Medulloblastoma                                                                     | Cancer |
| 4081190  | Squamous cell carcinoma of floor of mouth                                           | Cancer |
| 40486175 | Malignant neoplasm of anterior mediastinum                                          | Cancer |
| 4180779  | Malignant tumor of lip                                                              | Cancer |
| 138378   | SÅ@zary's disease of lymph nodes of axilla AND/OR upper limb                        | Cancer |
| 4089754  | Malignant neoplasm of middle lobe of lung                                           | Cancer |
| 40480205 | Malignant thymoma                                                                   | Cancer |
| 4181344  | Malignant tumor of splenic flexure                                                  | Cancer |
| 442151   | Hodgkin's disease, lymphocytic depletion of lymph nodes of axilla AND/OR upper limb | Cancer |
| 4162999  | Carcinoma of vocal cord                                                             | Cancer |
| 441812   | Malignant histiocytosis of intrathoracic lymph nodes                                | Cancer |
| 4095146  | Malignant melanoma of foot                                                          | Cancer |
| 4113107  | Carcinoma of lip, oral cavity and pharynx                                           | Cancer |
| 4092374  | Malignant melanoma of thigh                                                         | Cancer |
| 4002343  | Overlapping malignant neoplasm of peripheral nerves and autonomic nervous system    | Cancer |
| 4091485  | Malignant tumor of kidney parenchyma                                                | Cancer |
| 4095167  | Malignant tumor of ureteric orifice                                                 | Cancer |
| 4111023  | Malignant tumor of anus and anal canal                                              | Cancer |
| 4112867  | Sarcoma of uterus                                                                   | Cancer |
| 4180795  | Malignant tumor of pleura                                                           | Cancer |
| 4307263  | Hurthle cell carcinoma of thyroid                                                   | Cancer |
| 4181335  | Malignant tumor of lower gingiva                                                    | Cancer |
| 433156   | Hodgkin's sarcoma of intrathoracic lymph nodes                                      | Cancer |
| 4174440  | Dermatofibrosarcoma protuberans                                                     | Cancer |
| 4301516  | Paget's disease of nipple                                                           | Cancer |
| 40486201 | Nasopharyngeal carcinoma                                                            | Cancer |
| 4094543  | Diffuse malignant lymphoma - small non-cleaved cell                                 | Cancer |
| 4174765  | Gastric lymphoma                                                                    | Cancer |
| 4094409  | Malignant neoplasms of independent (primary) multiple sites                         | Cancer |
| 4003683  | Primary malignant neoplasm of fundus uteri                                          | Cancer |
| 4149322  | Primary malignant neoplasm of unknown site                                          | Cancer |
| 4110861  | Familial cancer of breast                                                           | Cancer |
| 4297200  | Angiosarcoma                                                                        | Cancer |
| 442144   | Hodgkin's paragranuloma of lymph nodes of inguinal region AND/OR lower limb         | Cancer |
| 4003179  | Primary malignant neoplasm of peripheral nerves of trunk                            | Cancer |
| 442146   | Hodgkin's sarcoma of lymph nodes of head, face AND/OR neck                          | Cancer |
| 4178979  | Malignant tumor of neck                                                             | Cancer |
| 4112777  | Metastasis to bone of unknown primary                                               | Cancer |
| 40488898 | Malignant epithelial neoplasm of oropharynx                                         | Cancer |
| 4246126  | Primary malignant neoplasm of left upper lobe of lung                               | Cancer |
| 197232   | Malignant histiocytosis of lymph nodes of inguinal region AND/OR lower limb         | Cancer |
| 4089755  | Malignant neoplasm of lower lobe bronchus                                           | Cancer |
| 4181336  | Malignant tumor of soft palate                                                      | Cancer |
| 4162996  | Malignant neoplasm of upper limb bones and scapula                                  | Cancer |
| 4177231  | Malignant tumor of conjunctiva                                                      | Cancer |

## SUPPORTING INFORMATION Newby 2022 Metformin versus sulfonylureas on Dementia and Parkinson's risk

|          |                                                                                              |        |
|----------|----------------------------------------------------------------------------------------------|--------|
| 439267   | SÅ@zary's disease of intra-abdominal lymph nodes                                             | Cancer |
| 4180912  | Malignant tumor of optic nerve                                                               | Cancer |
| 4178964  | Malignant tumor of palate                                                                    | Cancer |
| 4116201  | Rhabdomyosarcoma                                                                             | Cancer |
| 4116224  | Malignant melanoma of choroid                                                                | Cancer |
| 4112734  | Malignant tumor of endocrine pancreas                                                        | Cancer |
| 4117850  | Carcinoma of breast - upper, inner quadrant                                                  | Cancer |
| 4116236  | Malignant tumor of ear, nose and throat                                                      | Cancer |
| 4177240  | Malignant tumor of meninges                                                                  | Cancer |
| 442150   | Hodgkin's disease, lymphocytic depletion of lymph nodes of inguinal region AND/OR lower limb | Cancer |
| 439282   | Hodgkin's disease, lymphocytic depletion of intrapelvic lymph nodes                          | Cancer |
| 439302   | Malignant neoplasm of scalp                                                                  | Cancer |
| 4177103  | Malignant tumor of lateral wall of nasopharynx                                               | Cancer |
| 4142116  | HER2-positive carcinoma of breast                                                            | Cancer |
| 4089661  | Malignant neoplasm, overlapping lesion of colon                                              | Cancer |
| 4312567  | Primary malignant neoplasm of upper lobe of right lung                                       | Cancer |
| 4094720  | Malignant tumor of tonsillar pillar                                                          | Cancer |
| 40486562 | Carcinoma of peritoneum                                                                      | Cancer |
| 4115138  | Carcinoma of parotid gland                                                                   | Cancer |
| 42872396 | Primary adenocarcinoma of colon                                                              | Cancer |
| 198372   | Hodgkin's sarcoma of intra-abdominal lymph nodes                                             | Cancer |
| 438094   | Primary malignant neoplasm of soft tissues of lower limb                                     | Cancer |
| 4177242  | Malignant tumor of lower limb                                                                | Cancer |
| 4315672  | Secondary malignant neoplasm of retroperitoneal lymph nodes                                  | Cancer |
| 135765   | SÅ@zary's disease of lymph nodes of head, face AND/OR neck                                   | Cancer |
| 4154630  | Malignant neoplasm of genitourinary organ                                                    | Cancer |
| 4196259  | Metastasis from malignant tumor of bone                                                      | Cancer |
| 36716620 | Malignant epithelial neoplasm                                                                | Cancer |
| 4149838  | Malignant tumor of greater curve of stomach                                                  | Cancer |
| 4154629  | Malignant neoplasm of bone, connective tissue, skin and breast                               | Cancer |
| 199762   | SÅ@zary's disease of lymph nodes of inguinal region AND/OR lower limb                        | Cancer |
| 40492021 | Malignant neoplasm of lateral wall of oropharynx                                             | Cancer |
| 197511   | Malignant mast cell tumor of spleen                                                          | Cancer |
| 4330242  | Human epidermal growth factor 2 negative carcinoma of breast                                 | Cancer |
| 36712816 | Squamous cell carcinoma of right lung                                                        | Cancer |
| 4162251  | Malignant neoplasm of skin head and neck                                                     | Cancer |
| 434601   | Malignant mast cell tumor of intrathoracic lymph nodes                                       | Cancer |
| 4143848  | Subacute leukemia in remission                                                               | Cancer |
| 4252535  | Adenocarcinoma of liver                                                                      | Cancer |
| 4256775  | Adenocarcinoma of duodenum                                                                   | Cancer |
| 4115272  | Carcinoma of ampulla of Vater                                                                | Cancer |
| 442159   | Hodgkin's disease, mixed cellularity of spleen                                               | Cancer |
| 4095575  | Malignant neoplasm of ribs and/or sternum and/or clavicle                                    | Cancer |
| 40481938 | Chondrosarcoma                                                                               | Cancer |
| 4116240  | Carcinoma of cecum                                                                           | Cancer |
| 36716990 | Secondary adenocarcinoma of bone                                                             | Cancer |
| 4110589  | Large cell carcinoma of lung                                                                 | Cancer |
| 441245   | Malignant mast cell tumor of lymph nodes of axilla AND/OR upper limb                         | Cancer |
| 4095594  | Malignant melanoma of upper arm                                                              | Cancer |
| 4160780  | Malignant neoplasm of breast upper outer quadrant                                            | Cancer |
| 4158977  | Retinoblastoma                                                                               | Cancer |
| 4116202  | Synovial sarcoma                                                                             | Cancer |
| 4111356  | IgG myeloma                                                                                  | Cancer |
| 435200   | Malignant histiocytosis of lymph nodes of axilla AND/OR upper limb                           | Cancer |
| 36712815 | Squamous cell carcinoma of left lung                                                         | Cancer |
| 4116198  | Lentigo maligna melanoma                                                                     | Cancer |
| 4173973  | Low grade B-cell lymphoma                                                                    | Cancer |
| 4116238  | Malignant tumor of digestive organ                                                           | Cancer |
| 4177235  | Malignant tumor of pituitary gland                                                           | Cancer |
| 198705   | Malignant mast cell tumor of lymph nodes of inguinal region AND/OR lower limb                | Cancer |
| 439291   | Hodgkin's granuloma of intra-abdominal lymph nodes                                           | Cancer |
| 4300119  | Squamous cell carcinoma of anogenital area                                                   | Cancer |
| 4178963  | Malignant tumor of gum                                                                       | Cancer |
| 4082459  | Hairy cell leukemia variant                                                                  | Cancer |
| 4139054  | Subacute lymphoid leukemia in remission                                                      | Cancer |
| 442155   | Hodgkin's granuloma of lymph nodes of axilla AND/OR upper limb                               | Cancer |
| 439281   | Hodgkin's disease, lymphocytic depletion of spleen                                           | Cancer |
| 4089530  | Malignant tumor of lateral floor of mouth                                                    | Cancer |

## SUPPORTING INFORMATION Newby 2022 Metformin versus sulfonylureas on Dementia and Parkinson's risk

|          |                                                                                |        |
|----------|--------------------------------------------------------------------------------|--------|
| 4181334  | Malignant tumor of upper gingiva                                               | Cancer |
| 4112985  | Anaplastic thyroid carcinoma                                                   | Cancer |
| 196650   | Leukemic reticuloendotheliosis of intrapelvic lymph nodes                      | Cancer |
| 40482780 | Seminoma                                                                       | Cancer |
| 4003836  | Immunoproliferative small intestinal disease                                   | Cancer |
| 4091474  | Malignant neoplasm of myometrium of corpus uteri                               | Cancer |
| 4193703  | Seminoma of descended testis                                                   | Cancer |
| 4155285  | Malignant neoplasm of central nervous system                                   | Cancer |
| 4266805  | Primary cutaneous T-cell lymphoma                                              | Cancer |
| 4146018  | Pseudomyxoma peritonei                                                         | Cancer |
| 37396745 | Squamous cell carcinoma of head and neck                                       | Cancer |
| 432267   | Hodgkin's disease, lymphocytic depletion of extranodal AND/OR solid organ site | Cancer |
| 4143997  | T-cell acute lymphoblastic leukemia in remission                               | Cancer |
| 4112862  | Granulosa cell tumor of ovary                                                  | Cancer |
| 4139395  | Retroperitoneal sarcoma                                                        | Cancer |
| 4095590  | Malignant melanoma of forehead                                                 | Cancer |
| 4314485  | Secondary malignant neoplasm of supraclavicular lymph nodes                    | Cancer |
| 4177102  | Malignant tumor of vallecula                                                   | Cancer |
| 4178973  | Malignant tumor of retina                                                      | Cancer |
| 4207182  | Carcinoma of ascending colon                                                   | Cancer |
| 442153   | Hodgkin's granuloma of lymph nodes of inguinal region AND/OR lower limb        | Cancer |
| 440037   | Malignant tumor of ileum                                                       | Cancer |
| 4308479  | Non-small cell carcinoma of lung, TNM stage 4                                  | Cancer |
| 442145   | Hodgkin's sarcoma of lymph nodes of inguinal region AND/OR lower limb          | Cancer |
| 45768522 | Triple-negative breast cancer                                                  | Cancer |
| 4094854  | Malignant tumor of cervical part of esophagus                                  | Cancer |
| 4220146  | Malignant teratoma of testis                                                   | Cancer |
| 4112961  | Oligodendroglioma of brain                                                     | Cancer |
| 4117852  | Carcinoma breast - lower, outer quadrant                                       | Cancer |
| 439265   | SÅ@zary's disease of intrathoracic lymph nodes                                 | Cancer |
| 37016122 | Non-seminomatous germ cell neoplasm of testis                                  | Cancer |
| 4177109  | Malignant tumor of ethmoid sinus                                               | Cancer |
| 4094550  | Adult T-cell leukemia                                                          | Cancer |
| 4313083  | Secondary malignant neoplasm of head                                           | Cancer |
| 4047649  | Endocervical adenocarcinoma                                                    | Cancer |
| 444467   | Letterer-Siwe disease of intra-abdominal lymph nodes                           | Cancer |
| 4115028  | Carcinoma of sigmoid colon                                                     | Cancer |
| 4089652  | Malignant tumor aryepiglottic fold - hypopharyngeal aspect                     | Cancer |
| 4181487  | Malignant tumor of male genital organ                                          | Cancer |
| 4116230  | Adrenal carcinoma                                                              | Cancer |
| 4246472  | Malignant melanoma of skin of chest                                            | Cancer |
| 4144194  | Adamantinoma of long bone                                                      | Cancer |
| 439266   | SÅ@zary's disease of lymph nodes of inguinal region and lower limb             | Cancer |
| 4313335  | Adenocarcinoma of small intestine                                              | Cancer |
| 4095302  | Malignant tumor of cranial nerve                                               | Cancer |
| 443385   | Malignant tumor of jejunum                                                     | Cancer |
| 136916   | Primary malignant neoplasm of skin of external auditory canal                  | Cancer |
| 4110014  | Metastasis to liver of unknown primary                                         | Cancer |
| 4079553  | Anaplastic astrocytoma of brain                                                | Cancer |
| 198986   | Hodgkin's paraganuloma of intrapelvic lymph nodes                              | Cancer |
| 192270   | Malignant histiocytosis of intrapelvic lymph nodes                             | Cancer |
| 4116086  | Paget's disease of vulva                                                       | Cancer |
| 4181483  | Malignant tumor of parathyroid gland                                           | Cancer |
| 4309574  | Adenocarcinoma of anus                                                         | Cancer |
| 4112974  | Malignant tumor of peripheral nerve                                            | Cancer |
| 4094998  | Malignant neoplasm of humerus                                                  | Cancer |
| 4177233  | Malignant neoplasm of cerebral ventricles                                      | Cancer |
| 43530696 | Metastasis to lung from adenocarcinoma                                         | Cancer |
| 4178970  | Malignant neoplasm of labia majora                                             | Cancer |
| 4094865  | Malignant neoplasm of intrahepatic gall duct                                   | Cancer |
| 200667   | Malignant mast cell tumor of intrapelvic lymph nodes                           | Cancer |
| 37017351 | Invasive carcinoma of breast                                                   | Cancer |
| 4094721  | Malignant tumor of posterior wall of oropharynx                                | Cancer |
| 195196   | Hodgkin's sarcoma of intrapelvic lymph nodes                                   | Cancer |
| 434595   | Letterer-Siwe disease of intrathoracic lymph nodes                             | Cancer |
| 4113637  | Carcinoma of breast - lower, inner quadrant                                    | Cancer |
| 4110706  | Pancoast tumor                                                                 | Cancer |
| 444465   | Letterer-Siwe disease of lymph nodes of inguinal region AND/OR lower limb      | Cancer |

## SUPPORTING INFORMATION Newby 2022 Metformin versus sulfonylureas on Dementia and Parkinson's risk

|          |                                                                                       |        |
|----------|---------------------------------------------------------------------------------------|--------|
| 4111776  | Squamous cell carcinoma of buccal mucosa                                              | Cancer |
| 4181482  | Malignant neoplasm of spinal meninges                                                 | Cancer |
| 4187848  | Malignant neoplasm of breast lower outer quadrant                                     | Cancer |
| 193721   | Malignant histiocytosis of spleen                                                     | Cancer |
| 4180783  | Malignant tumor of lingual tonsil                                                     | Cancer |
| 4110873  | Carcinoma of vagina                                                                   | Cancer |
| 444462   | Malignant melanoma of skin of ear                                                     | Cancer |
| 4116234  | Carcinoma of bone, connective tissue, skin and breast                                 | Cancer |
| 4178961  | Malignant tumor of vermilion border of lower lip                                      | Cancer |
| 40490995 | Malignant neoplasm of posterior mediastinum                                           | Cancer |
| 4141248  | Sebaceous adenocarcinoma                                                              | Cancer |
| 320049   | Hodgkin's sarcoma of lymph nodes of axilla AND/OR upper limb                          | Cancer |
| 4098954  | Klatskin's tumor                                                                      | Cancer |
| 4082488  | Diffuse high grade B-cell lymphoma                                                    | Cancer |
| 4200893  | Metastasis from malignant melanoma of skin                                            | Cancer |
| 4181486  | Malignant tumor of nasal sinuses                                                      | Cancer |
| 35621826 | Clear cell adenocarcinoma of ovary                                                    | Cancer |
| 4201617  | Metastasis from malignant tumor of kidney                                             | Cancer |
| 4178957  | Malignant tumor of middle ear                                                         | Cancer |
| 4144302  | Hodgkin's disease in remission                                                        | Cancer |
| 43530697 | Metastasis to lymph node from squamous cell carcinoma                                 | Cancer |
| 37110034 | Malignant neoplasm of right upper lobe of lung                                        | Cancer |
| 439270   | SÅazary's disease of intrapelvic lymph nodes                                          | Cancer |
| 4110725  | Superficial spreading malignant melanoma of skin                                      | Cancer |
| 40487484 | Carcinoma of cheek                                                                    | Cancer |
| 37016272 | Adenocarcinoma in adenomatous polyp                                                   | Cancer |
| 4089658  | Malignant neoplasm of cardio-esophageal junction of stomach                           | Cancer |
| 42539251 | Adenocarcinoma of left lung                                                           | Cancer |
| 442156   | Hodgkin's granuloma of intrapelvic lymph nodes                                        | Cancer |
| 40488964 | Malignant neoplasm of connective tissue                                               | Cancer |
| 4315539  | Secondary malignant neoplasm of mesenteric lymph nodes                                | Cancer |
| 4193165  | Carcinoma of descending colon                                                         | Cancer |
| 196355   | Hodgkin's granuloma of spleen                                                         | Cancer |
| 40492484 | Squamous cell carcinoma of shoulder                                                   | Cancer |
| 195760   | SÅazary's disease of spleen                                                           | Cancer |
| 197816   | Letterer-Siwe disease of spleen                                                       | Cancer |
| 4181485  | Malignant tumor of upper limb                                                         | Cancer |
| 4110585  | Carcinoma of endocrine pancreas                                                       | Cancer |
| 4209933  | Carcinoma of head of pancreas                                                         | Cancer |
| 4322387  | Squamous cell carcinoma of lung, TNM stage 3                                          | Cancer |
| 4322885  | Malignant neoplasm of thoracic cavity structure                                       | Cancer |
| 4180796  | Malignant tumor of heart                                                              | Cancer |
| 4181354  | Malignant tumor of glans penis                                                        | Cancer |
| 444466   | Letterer-Siwe disease of lymph nodes of axilla AND/OR upper limb                      | Cancer |
| 196363   | Letterer-Siwe disease of intrapelvic lymph nodes                                      | Cancer |
| 40492017 | Carcinoma of ureter                                                                   | Cancer |
| 4092059  | Malignant tumor of thoracic part of esophagus                                         | Cancer |
| 443399   | Malignant tumor of bronchus                                                           | Cancer |
| 4246148  | Primary malignant neoplasm of right lower lobe of lung                                | Cancer |
| 4314487  | Secondary malignant neoplasm of omentum                                               | Cancer |
| 4312274  | Squamous cell carcinoma of lung, TNM stage 4                                          | Cancer |
| 4112760  | Nodular malignant melanoma of skin                                                    | Cancer |
| 37110032 | Malignant neoplasm of upper lobe of left lung                                         | Cancer |
| 4311997  | Non-small cell carcinoma of lung, TNM stage 3                                         | Cancer |
| 43531596 | Metastasis to lymph node from adenocarcinoma                                          | Cancer |
| 4193871  | Carcinoma of transverse colon                                                         | Cancer |
| 4180904  | Malignant tumor of urachus                                                            | Cancer |
| 37017320 | Malignant neoplastic disease co-occurrent with human immunodeficiency virus infection | Cancer |
| 4177111  | Malignant tumor of subglottis                                                         | Cancer |
| 4314042  | Sarcoma of soft tissue                                                                | Cancer |
| 4003180  | Diffuse non-Hodgkin's lymphoma, small cleaved cell                                    | Cancer |
| 4092377  | Malignant melanoma of toe                                                             | Cancer |
| 440350   | Malignant lymphoma - lymphocytic, intermediate differentiation                        | Cancer |
| 4181478  | Malignant tumor of cornea                                                             | Cancer |
| 4310448  | Squamous cell carcinoma of lung, TNM stage 1                                          | Cancer |
| 36712771 | Small cell carcinoma                                                                  | Cancer |
| 40480598 | Malignant fibromatous neoplasm                                                        | Cancer |
| 40480215 | Mixed ductal and lobular carcinoma of breast                                          | Cancer |
| 4156115  | Malignant neoplasm of endocrine gland                                                 | Cancer |
| 4314337  | Secondary malignant neoplasm of prostate                                              | Cancer |

## SUPPORTING INFORMATION Newby 2022 Metformin versus sulfonylureas on Dementia and Parkinson's risk

|          |                                                                |        |
|----------|----------------------------------------------------------------|--------|
| 4089516  | Malignant neoplasm of lower lip, external                      | Cancer |
| 4180913  | Malignant tumor of spleen                                      | Cancer |
| 4092517  | Choriocarcinoma                                                | Cancer |
| 4298235  | Alveolar rhabdomyosarcoma                                      | Cancer |
| 4234267  | Metastatic malignant neoplasm to lateral axillary lymph nodes  | Cancer |
| 4111020  | Sarcoma of bone and connective tissue                          | Cancer |
| 4089665  | Malignant tumor of peritoneum and retroperitoneum              | Cancer |
| 4089865  | Malignant melanoma of breast                                   | Cancer |
| 4197474  | Malignant neoplasm of upper eyelid                             | Cancer |
| 40481902 | Malignant neoplasm of anorectum                                | Cancer |
| 4112758  | Extramammary Paget's disease of skin                           | Cancer |
| 4111355  | IgA myeloma                                                    | Cancer |
| 45773362 | Carcinosarcoma of uterus                                       | Cancer |
| 4091931  | Malignant neoplasm of anterior epiglottis                      | Cancer |
| 4116339  | Malignant tumor of posterior wall of hypopharynx               | Cancer |
| 40480137 | Metastatic sarcoma                                             | Cancer |
| 4197475  | Malignant neoplasm of lower eyelid                             | Cancer |
| 4219402  | Malignant teratoma of descended testis                         | Cancer |
| 198710   | Hodgkin's sarcoma of spleen                                    | Cancer |
| 4095597  | Malignant melanoma of ankle                                    | Cancer |
| 4180785  | Malignant tumor of sublingual gland                            | Cancer |
| 4112854  | Malignant phyllodes tumor of breast                            | Cancer |
| 4313077  | Secondary malignant neoplasm of femur                          | Cancer |
| 4247832  | Primary malignant neoplasm of lower lobe of left lung          | Cancer |
| 4181349  | Malignant tumor of laryngeal cartilage                         | Cancer |
| 4111019  | Carcinoma of genitourinary organ                               | Cancer |
| 4112857  | Endometrioid carcinoma ovary                                   | Cancer |
| 4095316  | Malignant tumor of abdominal part of esophagus                 | Cancer |
| 4178971  | Malignant tumor of scrotum                                     | Cancer |
| 4310703  | Non-small cell carcinoma of lung, TNM stage 1                  | Cancer |
| 4079153  | Medulloblastoma of cerebellum                                  | Cancer |
| 4082011  | Malignant tumor of external ear                                | Cancer |
| 4208307  | Nonsquamous nonsmall cell neoplasm of lung                     | Cancer |
| 4116231  | Parathyroid carcinoma                                          | Cancer |
| 4091481  | Malignant tumor of body of penis                               | Cancer |
| 4322376  | Adenocarcinoma of rectosigmoid junction                        | Cancer |
| 4177110  | Malignant tumor of sphenoid sinus                              | Cancer |
| 4095156  | Malignant neoplasm of endocervical canal                       | Cancer |
| 4181337  | Malignant tumor of uvula                                       | Cancer |
| 4089864  | Malignant melanoma of axilla                                   | Cancer |
| 40481499 | Malignant fibrous histiocytoma                                 | Cancer |
| 4307838  | Ovarian cancer, disseminated                                   | Cancer |
| 4177104  | Malignant tumor of postcricoid region                          | Cancer |
| 4112856  | Mucinous cystadenocarcinoma of ovary                           | Cancer |
| 4082461  | Precursor B-cell acute lymphoblastic leukemia                  | Cancer |
| 40493492 | Adenocarcinoma of lower esophagus                              | Cancer |
| 4181352  | Malignant neoplasm of labia minora                             | Cancer |
| 4335884  | Sebaceous adenocarcinoma of eyelid                             | Cancer |
| 4082462  | T-cell acute lymphoblastic leukemia                            | Cancer |
| 40491873 | Sarcoma of endometrium                                         | Cancer |
| 4297355  | Aggressive NK-cell leukemia involving skin                     | Cancer |
| 40480651 | Mucinous carcinoma of breast                                   | Cancer |
| 4301642  | Malignant peripheral nerve sheath tumor                        | Cancer |
| 4252536  | Squamous cell carcinoma of epiglottis                          | Cancer |
| 4244050  | Malignant melanoma of skin of back                             | Cancer |
| 4181348  | Malignant tumor of frontal sinus                               | Cancer |
| 4080741  | Malignant lymphoma of thyroid gland                            | Cancer |
| 4162877  | Carcinoma of extrahepatic bile duct                            | Cancer |
| 4246121  | Primary malignant neoplasm of hilus of lung                    | Cancer |
| 40493029 | Lymphoma of small bowel                                        | Cancer |
| 4032866  | Overlapping malignant neoplasm of bone and articular cartilage | Cancer |
| 4173955  | T-cell chronic lymphocytic leukemia                            | Cancer |
| 4231817  | Malignant pericardial effusion                                 | Cancer |
| 4033893  | Kaposi's sarcoma of multiple organs                            | Cancer |
| 4092530  | Malignant tumor of lacrimal gland                              | Cancer |
| 4092519  | Malignant neoplasm of isthmus of uterine body                  | Cancer |
| 4155292  | Malignant neoplasm of axillary tail of breast                  | Cancer |
| 4080901  | Amelanotic malignant melanoma of skin                          | Cancer |
| 4338758  | Malignant tumor of eyelid                                      | Cancer |
| 4201622  | Metastasis from malignant tumor of thyroid                     | Cancer |
| 4178975  | Malignant neoplasm of cauda equina                             | Cancer |

## SUPPORTING INFORMATION Newby 2022 Metformin versus sulfonylureas on Dementia and Parkinson's risk

|          |                                                                           |        |
|----------|---------------------------------------------------------------------------|--------|
| 4224096  | Kaposi's sarcoma associated with AIDS                                     | Cancer |
| 4090216  | Malignant tumor of upper labial mucosa                                    | Cancer |
| 4308149  | Mucoepidermoid carcinoma of parotid gland                                 | Cancer |
| 4094544  | Malignant lymphoma - mixed small and large cell                           | Cancer |
| 4338760  | Malignant melanoma of eyelid                                              | Cancer |
| 4309400  | Adenoid cystic carcinoma of salivary gland                                | Cancer |
| 4114338  | Malignant tumor of dermis                                                 | Cancer |
| 37110031 | Malignant neoplasm of lower lobe of right lung                            | Cancer |
| 4181356  | Malignant tumor of spermatic cord                                         | Cancer |
| 4116085  | Malignant melanoma of vulva                                               | Cancer |
| 4113112  | Squamous cell carcinoma of bladder                                        | Cancer |
| 4095758  | Malignant tumor of pelviureteric junction                                 | Cancer |
| 37110033 | Malignant neoplasm of lower lobe of left lung                             | Cancer |
| 4174442  | Lymphoma of intestine                                                     | Cancer |
| 4315547  | Secondary malignant neoplasm of neck                                      | Cancer |
| 4116075  | Malignant granulosa cell tumor of ovary                                   | Cancer |
| 4301652  | Dedifferentiated liposarcoma                                              | Cancer |
| 4187849  | Malignant neoplasm of breast upper inner quadrant                         | Cancer |
| 4322241  | Carcinoma of urinary bladder, invasive                                    | Cancer |
| 4258135  | Asymptomatic multiple myeloma                                             | Cancer |
| 4162137  | Carcinoma of penis                                                        | Cancer |
| 4091333  | Malignant neoplasm of skin of cheek, external                             | Cancer |
| 4256777  | Squamous cell carcinoma of pharynx                                        | Cancer |
| 4193580  | Malignant melanoma of chest wall                                          | Cancer |
| 194585   | Secondary malignant neoplasm of inguinal lymph nodes                      | Cancer |
| 4248192  | Secondary malignant neoplasm of pancreas                                  | Cancer |
| 4313916  | Secondary malignant neoplasm of pelvis                                    | Cancer |
| 4095305  | Malignant tumor of craniopharyngeal duct                                  | Cancer |
| 40487047 | Malignant neoplasm of carotid body                                        | Cancer |
| 4246231  | Primary malignant neoplasm of skin of forehead                            | Cancer |
| 4197600  | Lambda light chain myeloma                                                | Cancer |
| 4079692  | High grade B-cell lymphoma                                                | Cancer |
| 4099699  | Fibrolamellar hepatocellular carcinoma                                    | Cancer |
| 4315658  | Secondary malignant neoplasm of parotid gland                             | Cancer |
| 4180782  | Malignant tumor of vermilion border of upper lip                          | Cancer |
| 40493020 | Malignant neoplasm of upper respiratory tract                             | Cancer |
| 4181355  | Malignant tumor of epididymis                                             | Cancer |
| 4155168  | Malignant neoplasm of clitoris                                            | Cancer |
| 4138008  | Philadelphia chromosome-positive acute lymphoblastic leukemia             | Cancer |
| 4094261  | Malignant neoplasm of peripheral nerves of upper limb, including shoulder | Cancer |
| 4003832  | Diffuse non-Hodgkin's lymphoma, immunoblastic                             | Cancer |
| 4313225  | Secondary malignant neoplasm of vagina                                    | Cancer |
| 4300560  | Multiple squamous cell carcinomata                                        | Cancer |
| 4112855  | Serous papillary cystadenocarcinoma ovary                                 | Cancer |
| 4200884  | Local recurrence of malignant tumor of thyroid gland                      | Cancer |
| 40492509 | Carcinoma of urethra                                                      | Cancer |
| 4248198  | Secondary malignant neoplasm of pectoral axillary lymph nodes             | Cancer |
| 4226624  | Malignant lymphoma of the eye region                                      | Cancer |
| 4111805  | Squamous cell carcinoma of bronchus                                       | Cancer |
| 4311342  | Secondary malignant neoplasm of spinal cord                               | Cancer |
| 4200890  | Local recurrence of malignant tumor of prostate                           | Cancer |
| 40493428 | Malignant neoplasm of respiratory system                                  | Cancer |
| 4313931  | Secondary malignant neoplasm of skin of breast                            | Cancer |
| 4196264  | Metastasis from malignant tumor of colon                                  | Cancer |
| 4095591  | Malignant melanoma of temple                                              | Cancer |
| 4092372  | Malignant melanoma of finger                                              | Cancer |
| 4311764  | Secondary malignant neoplasm of chest wall                                | Cancer |
| 4309539  | Malignant melanoma of skin of lower eyelid                                | Cancer |
| 4177106  | Malignant neoplasm of omentum                                             | Cancer |
| 4166154  | Combined hepatocellular carcinoma and cholangiocarcinoma                  | Cancer |
| 40490343 | Chordoma of clivus                                                        | Cancer |
| 37018641 | Malignant glioma of central nervous system                                | Cancer |
| 4188299  | Kappa light chain myeloma                                                 | Cancer |
| 442143   | Malignant melanoma of skin of scalp                                       | Cancer |
| 4307152  | Adenocarcinoma of nasopharynx                                             | Cancer |
| 4151265  | Secondary nodes - axilla/arm                                              | Cancer |
| 4112770  | Metastasis to lung of unknown primary                                     | Cancer |
| 4092381  | Malignant neoplasm of skin of temple                                      | Cancer |
| 4313088  | Secondary malignant neoplasm of iliac lymph nodes                         | Cancer |
| 4266193  | Primary cutaneous lymphoma                                                | Cancer |

## SUPPORTING INFORMATION Newby 2022 Metformin versus sulfonylureas on Dementia and Parkinson's risk

|          |                                                                             |        |
|----------|-----------------------------------------------------------------------------|--------|
| 40493021 | Malignant neoplasm of parietal pleura                                       | Cancer |
| 4166769  | Palate carcinoma                                                            | Cancer |
| 40491000 | Malignant neoplasm of parametrium                                           | Cancer |
| 40479582 | Adenocarcinoma of head and neck                                             | Cancer |
| 4181353  | Malignant tumor of foreskin                                                 | Cancer |
| 4112143  | Carcinoma of anal canal                                                     | Cancer |
| 40486574 | Chondrosarcoma of bone                                                      | Cancer |
| 4112739  | Oat cell carcinoma of lung                                                  | Cancer |
| 4097706  | Myelomonocytic leukemia                                                     | Cancer |
| 40484012 | Non-Hodgkin lymphoma associated with Human immunodeficiency virus infection | Cancer |
| 4301646  | Botryoid rhabdomyosarcoma                                                   | Cancer |
| 4221190  | Gestational choriocarcinoma                                                 | Cancer |
| 4180905  | Malignant tumor of paraurethral gland                                       | Cancer |
| 4177238  | Malignant tumor of cloacogenic zone                                         | Cancer |
| 4095160  | Malignant neoplasm of round ligament                                        | Cancer |
| 4002358  | Lymphoepithelioid lymphoma                                                  | Cancer |
| 4001331  | Prolymphocytic leukemia                                                     | Cancer |
| 4116077  | Dysgerminoma of ovary                                                       | Cancer |
| 4313200  | Squamous cell carcinoma of lung, TNM stage 2                                | Cancer |
| 4112491  | Metastasis to lymph node of unknown primary                                 | Cancer |
| 4306965  | Olfactory neuroblastoma                                                     | Cancer |
| 434599   | Hodgkin's granuloma of extranodal AND/OR solid organ site                   | Cancer |
| 4003187  | Acute myelomonocytic leukemia, FAB M4                                       | Cancer |
| 4196266  | Metastasis from malignant tumor of liver                                    | Cancer |
| 4092364  | Malignant melanoma of auricle                                               | Cancer |
| 40480611 | Oxyphilic adenocarcinoma                                                    | Cancer |
| 4201477  | Local recurrence of malignant tumor of breast                               | Cancer |
| 4246803  | Primary malignant neoplasm of bone of upper limb                            | Cancer |
| 4311501  | Primary malignant neoplasm of right middle lobe of lung                     | Cancer |
| 4246034  | Primary malignant neoplasm of common bile duct                              | Cancer |
| 4300686  | Myxoid liposarcoma                                                          | Cancer |
| 762427   | Primary malignant neoplasm of right lung                                    | Cancer |
| 4116578  | Metastasis to vertebral column of unknown primary                           | Cancer |
| 4095148  | Malignant neoplasm of skin of auricle                                       | Cancer |
| 4092384  | Malignant neoplasm of skin of lower leg                                     | Cancer |
| 4157448  | Carcinoma of male breast                                                    | Cancer |
| 4092356  | Malignant neoplasm of connective and soft tissue of thigh and upper leg     | Cancer |
| 4115130  | Carcinoma of soft palate                                                    | Cancer |
| 4042194  | Malignant meningitis                                                        | Cancer |
| 40491441 | Sarcoma of bone                                                             | Cancer |
| 40487050 | Anorectal adenocarcinoma                                                    | Cancer |
| 4307721  | Primary malignant neoplasm of peripheral nerve                              | Cancer |
| 36715933 | Primary adenocarcinoma of peritoneum                                        | Cancer |
| 40492386 | Adenosarcoma of uterus                                                      | Cancer |
| 4300682  | Embryonal rhabdomyosarcoma                                                  | Cancer |
| 4297341  | Sclerosing liposarcoma                                                      | Cancer |
| 4097581  | Chronic neutrophilic leukemia                                               | Cancer |
| 4309248  | Squamous cell carcinoma of nasopharynx                                      | Cancer |
| 4247347  | Primary malignant neoplasm of skin of back                                  | Cancer |
| 4200889  | Local recurrence of malignant tumor of urinary bladder                      | Cancer |
| 4003831  | Diffuse non-Hodgkin's lymphoma, undifferentiated                            | Cancer |
| 4089647  | Malignant tumor of adenoid                                                  | Cancer |
| 4080742  | Malignant lymphoma of breast                                                | Cancer |
| 4095143  | Malignant melanoma of buttock                                               | Cancer |
| 4092218  | Malignant neoplasm of middle lobe bronchus                                  | Cancer |
| 4298034  | Desmoplastic malignant melanoma                                             | Cancer |
| 4301780  | Leukemic infiltration of skin                                               | Cancer |
| 4110587  | Malignant tumor of lung parenchyma                                          | Cancer |
| 4112610  | Carcinoma of duodenum                                                       | Cancer |
| 4174595  | Squamous cell carcinoma of palate                                           | Cancer |
| 4246922  | Primary malignant neoplasm of epiglottis                                    | Cancer |
| 4299133  | Carcinomatous metastasis in skin                                            | Cancer |
| 4226357  | Malignant neoplasm associated with AIDS                                     | Cancer |
| 46273197 | Malignant neoplasm of short bone of lower limb                              | Cancer |
| 37017595 | Burkitt lymphoma co-occurrent with human immunodeficiency virus infection   | Cancer |
| 36716501 | Primary malignant epithelial neoplasm of nasopharynx                        | Cancer |
| 4313205  | Malignant melanoma of skin of upper eyelid                                  | Cancer |
| 4299152  | Follicular center B-cell lymphoma                                           | Cancer |
| 4181340  | Malignant tumor of branchial cleft                                          | Cancer |



## SUPPORTING INFORMATION Newby 2022 Metformin versus sulfonylureas on Dementia and Parkinson's risk

|          |                                                                            |        |
|----------|----------------------------------------------------------------------------|--------|
| 4178958  | Malignant tumor of soft tissue of pelvis                                   | Cancer |
| 4162138  | Malignant neoplasm of bone of lower limb                                   | Cancer |
| 4155167  | Malignant neoplasm of adrenal medulla                                      | Cancer |
| 4089655  | Malignant tumor of Waldeyer's ring                                         | Cancer |
| 4089524  | Malignant neoplasm of base of tongue dorsal surface                        | Cancer |
| 4089520  | Malignant tumor of labial mucosa                                           | Cancer |
| 4003835  | Alpha heavy chain disease                                                  | Cancer |
| 4003182  | T-zone lymphoma                                                            | Cancer |
| 439761   | Letterer-Siwe disease of extranodal AND/OR solid organ site                | Cancer |
| 435198   | Hodgkin's disease, nodular sclerosis of lymph nodes of head, face and neck | Cancer |
| 372569   | Malignant neoplasm of nasolacrimal duct                                    | Cancer |
| 25757    | Primary malignant neoplasm of aortic body                                  | Cancer |
| 4082464  | Light chain myeloma                                                        | Cancer |
| 4094864  | Primary carcinoma of liver                                                 | Cancer |
| 4322388  | Carcinoma of urinary bladder, superficial                                  | Cancer |
| 4244049  | Malignant melanoma of skin of abdomen                                      | Cancer |
| 4177100  | Malignant tumor of commissure of lip                                       | Cancer |
| 40492937 | Carcinoma of appendix                                                      | Cancer |
| 4298029  | Adenosquamous cell carcinoma                                               | Cancer |
| 37016104 | Squamous cell carcinoma of vagina                                          | Cancer |
| 40486731 | Malignant neoplasm of pelvic peritoneum                                    | Cancer |
| 4115295  | Malignant skin tumor with eccrine differentiation                          | Cancer |
| 4092359  | Malignant neoplasm of connective and soft tissue of abdominal wall         | Cancer |
| 42872399 | Primary adenocarcinoma of pancreas                                         | Cancer |
| 4314172  | Non-small cell carcinoma of lung, TNM stage 2                              | Cancer |
| 4207183  | Carcinoma of hepatic flexure                                               | Cancer |
| 4198275  | Cystadenocarcinoma of ovary                                                | Cancer |
| 4092375  | Malignant melanoma of knee                                                 | Cancer |
| 4201620  | Metastasis from malignant tumor of stomach                                 | Cancer |
| 36717017 | Primary adenocarcinoma of upper lobe of right lung                         | Cancer |
| 4227963  | Precursor T-cell lymphoblastic lymphoma                                    | Cancer |
| 4095746  | Malignant neoplasm of cervical stump                                       | Cancer |
| 4095151  | Malignant neoplasm of skin of forearm                                      | Cancer |
| 4198445  | Metastasis from malignant tumor of esophagus                               | Cancer |
| 442127   | Primary malignant neoplasm of nipple of female breast                      | Cancer |
| 40490990 | Malignant epithelial neoplasm of hypopharynx                               | Cancer |
| 4196263  | Metastasis from malignant tumor of bladder                                 | Cancer |
| 4244170  | Malignant melanoma of skin of forearm                                      | Cancer |
| 4225833  | Malignant tumor of vermilion border of lip                                 | Cancer |
| 4314481  | Secondary malignant neoplasm of spinal meninges                            | Cancer |
| 4307266  | Adenoid cystic carcinoma of submandibular gland                            | Cancer |
| 4162134  | Carcinoma of endocervix                                                    | Cancer |
| 46271011 | Malignant neoplasm of superior wall of nasopharynx                         | Cancer |
| 40486208 | Carcinoma of pharynx                                                       | Cancer |
| 762426   | Primary malignant neoplasm of left lung                                    | Cancer |
| 45768840 | Primary squamous cell carcinoma of larynx                                  | Cancer |
| 37018657 | Primary adenocarcinoma of gallbladder                                      | Cancer |
| 4174910  | Squamous cell carcinoma of gum                                             | Cancer |
| 4095757  | Malignant tumor of renal calyx                                             | Cancer |
| 4095438  | Overlapping malignant lesion of retroperitoneum and peritoneum             | Cancer |
| 4310575  | Carcinoma of uterine cervix, invasive                                      | Cancer |
| 4119828  | Adenocarcinoma of ileum                                                    | Cancer |
| 4311765  | Secondary malignant neoplasm of colon                                      | Cancer |
| 4197583  | Squamous cell carcinoma of bronchus in right upper lobe                    | Cancer |
| 4116242  | Carcinoma common bile duct                                                 | Cancer |
| 4095595  | Malignant melanoma of hand                                                 | Cancer |
| 4092366  | Malignant melanoma of chin                                                 | Cancer |
| 4246130  | Primary malignant neoplasm of maxilla                                      | Cancer |
| 4111775  | Carcinoma of hard palate                                                   | Cancer |
| 40492932 | Carcinoma of nose                                                          | Cancer |
| 4092373  | Malignant melanoma of hip                                                  | Cancer |
| 4312684  | Primary malignant neoplasm of skin of groin                                | Cancer |
| 40490989 | Carcinoma of small intestine                                               | Cancer |
| 440050   | Malignant melanoma of skin of neck                                         | Cancer |
| 4196256  | Local recurrence of malignant tumor of rectum                              | Cancer |
| 4180906  | Malignant tumor of orbit                                                   | Cancer |
| 4193872  | Carcinoma of splenic flexure                                               | Cancer |
| 4079289  | Follicular malignant lymphoma - small cleaved cell                         | Cancer |
| 4162136  | Carcinoma of supraglottis                                                  | Cancer |
| 4089868  | Malignant melanoma of heel                                                 | Cancer |

## SUPPORTING INFORMATION Newby 2022 Metformin versus sulfonylureas on Dementia and Parkinson's risk

|          |                                                                  |        |
|----------|------------------------------------------------------------------|--------|
| 4246039  | Primary malignant neoplasm of femur                              | Cancer |
| 4216273  | Primary malignant neoplasm of ear, nose AND/OR throat            | Cancer |
| 4312430  | Secondary malignant neoplasm of intestinal lymph nodes           | Cancer |
| 4311287  | Mucoepidermoid carcinoma of salivary gland                       | Cancer |
| 4289392  | Primary malignant neoplasm of right ovary                        | Cancer |
| 4095144  | Malignant melanoma of thumb                                      | Cancer |
| 4315809  | Secondary malignant neoplasm of thyroid gland                    | Cancer |
| 4246232  | Primary malignant neoplasm of skin of hand                       | Cancer |
| 40492934 | Carcinoma of nasal cavity                                        | Cancer |
| 4315659  | Secondary malignant neoplasm of parotid lymph nodes              | Cancer |
| 4312681  | Primary malignant neoplasm of skin of chest                      | Cancer |
| 4311148  | Adenocarcinoma carcinomatosis                                    | Cancer |
| 4247349  | Primary malignant neoplasm of skin of buttock                    | Cancer |
| 4313751  | Large cell carcinoma of lung, TNM stage 4                        | Cancer |
| 4116081  | Adenosquamous carcinoma of cervix                                | Cancer |
| 4289681  | Primary malignant neoplasm of left ovary                         | Cancer |
| 40491440 | Non-Hodgkin's lymphoma of stomach                                | Cancer |
| 4300688  | Yolk sac tumor                                                   | Cancer |
| 4091925  | Chronic eosinophilic leukemia                                    | Cancer |
| 45773564 | Primary squamous cell carcinoma of vallecula                     | Cancer |
| 45771015 | Primary squamous cell carcinoma of maxillary sinus               | Cancer |
| 45769122 | Primary squamous cell carcinoma of pyriform sinus                | Cancer |
| 45769091 | Primary squamous cell carcinoma of glottis                       | Cancer |
| 45768917 | Primary mucinous adenocarcinoma of lung                          | Cancer |
| 44783718 | T-cell large granular lymphocytic leukemia                       | Cancer |
| 44783286 | Low grade endometrial stromal sarcoma                            | Cancer |
| 42709764 | Malignant melanoma of skin of lower leg                          | Cancer |
| 42538151 | Osteoporosis co-occurrent and due to multiple myeloma            | Cancer |
| 40493442 | Philadelphia chromosome positive chronic myelogenous leukemia    | Cancer |
| 40489405 | Carcinoma of anus                                                | Cancer |
| 40381321 | Malignant neoplasm of dorsal surface of tongue                   | Cancer |
| 37396737 | Extraovarian primary peritoneal carcinoma                        | Cancer |
| 37018947 | Primary squamous cell carcinoma of palatine tonsil               | Cancer |
| 36717490 | Primary adenocarcinoma of cardia of stomach                      | Cancer |
| 36717489 | Primary squamous cell carcinoma of middle third of esophagus     | Cancer |
| 36716972 | Primary squamous cell carcinoma of anus                          | Cancer |
| 36716941 | Primary squamous cell carcinoma of nasal cavity                  | Cancer |
| 36716610 | Primary squamous cell carcinoma of base of tongue                | Cancer |
| 36716511 | Primary squamous cell carcinoma of anal canal                    | Cancer |
| 36715928 | Primary adenocarcinoma of ampulla of Vater                       | Cancer |
| 36715927 | Primary cholangiocarcinoma of intrahepatic biliary tract         | Cancer |
| 36715912 | Primary adenocarcinoma of transverse colon                       | Cancer |
| 36715890 | Primary mucinous adenocarcinoma of appendix                      | Cancer |
| 36715889 | Primary neuroendocrine carcinoma of small intestine              | Cancer |
| 4315813  | Secondary malignant neoplasm of urethra                          | Cancer |
| 4315795  | Secondary malignant neoplasm of skin of neck                     | Cancer |
| 4315684  | Secondary malignant neoplasm of skin of face                     | Cancer |
| 4314495  | Secondary malignant neoplasm of uterus                           | Cancer |
| 4314191  | Secondary malignant neoplasm of ureter                           | Cancer |
| 4314055  | Secondary malignant neoplasm of superficial inguinal lymph nodes | Cancer |
| 4314054  | Secondary malignant neoplasm of submental lymph nodes            | Cancer |
| 4313092  | Secondary malignant neoplasm of jejunum                          | Cancer |
| 4312798  | Carcinoma ex pleomorphic adenoma of parotid gland                | Cancer |
| 4312705  | Secondary malignant neoplasm of base of tongue                   | Cancer |
| 4312688  | Primary malignant neoplasm of skin of thigh                      | Cancer |
| 4312682  | Primary malignant neoplasm of skin of foot                       | Cancer |
| 4312667  | Thyroid cancer metastatic to bone                                | Cancer |
| 4312281  | Secondary malignant neoplasm of bronchopulmonary lymph nodes     | Cancer |
| 4312020  | Secondary malignant neoplasm of infraclavicular lymph nodes      | Cancer |
| 4311614  | Primary malignant neoplasm of skin of hip                        | Cancer |
| 4311500  | Primary malignant neoplasm of rib                                | Cancer |
| 4311475  | Primary malignant neoplasm of frontal bone                       | Cancer |
| 4311473  | Secondary malignant neoplasm of tongue                           | Cancer |
| 4311345  | Secondary malignant neoplasm of submandibular lymph nodes        | Cancer |
| 4308934  | Malignant glioma of brainstem                                    | Cancer |
| 4248057  | Secondary malignant neoplasm of ileum                            | Cancer |
| 4247823  | Primary malignant neoplasm of clavicle                           | Cancer |
| 4247353  | Primary malignant neoplasm of skin of shoulder                   | Cancer |
| 4247352  | Primary malignant neoplasm of skin of knee                       | Cancer |
| 4247351  | Primary malignant neoplasm of skin of finger                     | Cancer |
| 4246470  | Malignant melanoma of perianal skin                              | Cancer |

## SUPPORTING INFORMATION Newby 2022 Metformin versus sulfonylureas on Dementia and Parkinson's risk

|         |                                                                     |        |
|---------|---------------------------------------------------------------------|--------|
| 4246241 | Primary malignant neoplasm of omentum                               | Cancer |
| 4246237 | Primary malignant neoplasm of sternum                               | Cancer |
| 4246228 | Primary malignant neoplasm of skin of chin                          | Cancer |
| 4245918 | Malignant melanoma of skin of eyebrow                               | Cancer |
| 4245466 | Malignant melanoma of skin of axilla                                | Cancer |
| 4233531 | Acute myeloid leukemia, minimal differentiation, FAB M0             | Cancer |
| 4215664 | Malignant sacral teratoma                                           | Cancer |
| 4189506 | Mucosa-associated lymphoid tissue (MALT) lymphoma of orbit          | Cancer |
| 4181350 | Malignant tumor of soft tissue of head                              | Cancer |
| 4180914 | Multiple malignancy                                                 | Cancer |
| 4180903 | Malignant tumor of soft tissue of neck                              | Cancer |
| 4177241 | Malignant tumor of axilla                                           | Cancer |
| 4177108 | Malignant tumor of nasal septum                                     | Cancer |
| 4177099 | Malignant neoplasm of mesentery                                     | Cancer |
| 4162252 | Carcinoma of upper lobe, bronchus or lung                           | Cancer |
| 4157331 | Malignant neoplasm of nervous system                                | Cancer |
| 4155293 | Carcinoma of lower lobe, bronchus or lung                           | Cancer |
| 4147161 | Malignant neoplasm of hand bones                                    | Cancer |
| 4133189 | Mixed seminoma teratoma of testis                                   | Cancer |
| 4123440 | Metastasis to multiple lymph nodes                                  | Cancer |
| 4116245 | SÅ@zary disease of skin                                             | Cancer |
| 4116229 | Mixed follicular and papillary thyroid carcinoma                    | Cancer |
| 4114342 | Lymphangitis carcinomatosa                                          | Cancer |
| 4114213 | Squamous cell carcinoma of cornea                                   | Cancer |
| 4112983 | Malignant melanoma of ciliary body                                  | Cancer |
| 4112982 | Malignant melanoma of conjunctiva                                   | Cancer |
| 4111002 | Squamous cell carcinoma of conjunctiva                              | Cancer |
| 4097583 | Granulocytic sarcoma                                                | Cancer |
| 4097582 | Chloroma                                                            | Cancer |
| 4095888 | Malignant neoplasm of midbrain                                      | Cancer |
| 4095887 | Malignant neoplasm of cerebral peduncle                             | Cancer |
| 4095762 | Malignant tumor of iris                                             | Cancer |
| 4095753 | Malignant tumor of seminal vesicle                                  | Cancer |
| 4095752 | Malignant neoplasm of greater vestibular (Bartholin's) gland        | Cancer |
| 4095747 | Malignant neoplasm of cornu of corpus uteri                         | Cancer |
| 4095738 | Malignant neoplasm of skin of heel                                  | Cancer |
| 4095737 | Malignant neoplasm of skin of popliteal fossa area                  | Cancer |
| 4095602 | Malignant neoplasm of skin of axillary fold                         | Cancer |
| 4095579 | Malignant neoplasm of sacral vertebra                               | Cancer |
| 4095576 | Malignant neoplasm of scapula and long bones of upper arm           | Cancer |
| 4095456 | Malignant neoplasm of lumbar vertebra                               | Cancer |
| 4095455 | Malignant neoplasm of cervical vertebra                             | Cancer |
| 4095447 | Malignant neoplasm of thyroid cartilage                             | Cancer |
| 4095434 | Malignant neoplasm of hepatic duct                                  | Cancer |
| 4095019 | Malignant neoplasm of connective and soft tissues of lumbar spine   | Cancer |
| 4095016 | Malignant neoplasm of connective and soft tissues of thoracic spine | Cancer |
| 4095010 | Malignant neoplasm of connective and soft tissue of finger          | Cancer |
| 4095008 | Malignant neoplasm of cartilage of ear                              | Cancer |
| 4095001 | Malignant neoplasm of fifth metacarpal bone                         | Cancer |
| 4094995 | Malignant neoplasm of thoracic vertebra                             | Cancer |
| 4094871 | Malignant tumor of tympanic cavity                                  | Cancer |
| 4094870 | Malignant neoplasm of cartilage of nose                             | Cancer |
| 4094857 | Malignant neoplasm of cardiac orifice of stomach                    | Cancer |
| 4094850 | Malignant neoplasm of posterior pharynx                             | Cancer |
| 4094254 | Malignant tumor of choroid plexus                                   | Cancer |
| 4094251 | Malignant neoplasm of hippocampus                                   | Cancer |
| 4093651 | Malignant tumor of frenum linguae                                   | Cancer |
| 4093649 | Malignant tumor of anterior two-thirds of tongue - dorsal surface   | Cancer |
| 4093141 | Malignant tumor of anterior two-thirds of tongue - ventral surface  | Cancer |
| 4092532 | Malignant neoplasm of cerebral cortex                               | Cancer |
| 4092531 | Malignant neoplasm of lacrimal sac                                  | Cancer |
| 4092369 | Malignant melanoma of perineum                                      | Cancer |
| 4092368 | Malignant melanoma of groin                                         | Cancer |
| 4092083 | Angiosarcoma of spleen                                              | Cancer |
| 4092078 | Malignant neoplasm of mesocolon                                     | Cancer |
| 4092074 | Malignant neoplasm of ectopic pancreatic tissue                     | Cancer |
| 4092057 | Malignant tumor of pharyngeal recess                                | Cancer |
| 4091766 | Secondary malignant neoplasm of cervix uteri                        | Cancer |
| 4091491 | Malignant neoplasm of basal ganglia                                 | Cancer |
| 4091482 | Malignant tumor of tunica vaginalis                                 | Cancer |
| 4091480 | Malignant neoplasm of vaginal vault                                 | Cancer |

## SUPPORTING INFORMATION Newby 2022 Metformin versus sulfonylureas on Dementia and Parkinson's risk

|          |                                                                              |        |
|----------|------------------------------------------------------------------------------|--------|
| 4091337  | Malignant neoplasm of skin of upper arm                                      | Cancer |
| 4091335  | Malignant neoplasm of skin of abdominal wall                                 | Cancer |
| 4089869  | Malignant melanoma of great toe                                              | Cancer |
| 4089859  | Malignant neoplasm of connective and soft tissue of perineum                 | Cancer |
| 4089858  | Malignant neoplasm of connective and soft tissue of buttock                  | Cancer |
| 4089856  | Malignant neoplasm of connective and soft tissue of foot                     | Cancer |
| 4089758  | Malignant neoplasm of thymus, heart and mediastinum                          | Cancer |
| 4089663  | Malignant neoplasm of intrahepatic canaliculi                                | Cancer |
| 4089526  | Malignant tumor of junctional zone of tongue                                 | Cancer |
| 4082485  | Acute monoclonal leukemia                                                    | Cancer |
| 4081049  | Glioblastoma multiforme of spinal cord                                       | Cancer |
| 4079700  | Peripheral T-cell lymphoma - pleomorphic medium and large cell               | Cancer |
| 4031129  | Overlapping malignant neoplasm of ill-defined site                           | Cancer |
| 4003694  | Primary malignant neoplasm of peripheral nerve of head, face AND/OR neck     | Cancer |
| 4002495  | Refractory anemia with excess blasts in transformation                       | Cancer |
| 4002360  | Gamma heavy chain disease                                                    | Cancer |
| 442188   | Secondary malignant neoplasm of duodenum                                     | Cancer |
| 442174   | Secondary malignant neoplasm of rectum                                       | Cancer |
| 440056   | Hodgkin's disease, mixed cellularity of lymph nodes of head, face and neck   | Cancer |
| 439288   | Hodgkin's disease, nodular sclerosis of lymph nodes of axilla and upper limb | Cancer |
| 436050   | Primary malignant neoplasm of areola of male breast                          | Cancer |
| 433148   | Primary malignant neoplasm of areola of female breast                        | Cancer |
| 197227   | Overlapping malignant neoplasm of gastrointestinal tract                     | Cancer |
| 138976   | Malignant neoplasm of overlapping lesion of lip                              | Cancer |
| 4145040  | Solitary osseous myeloma                                                     | Cancer |
| 4312288  | Secondary malignant neoplasm of central nervous system                       | Cancer |
| 40480206 | Mucosa-associated lymphoid tissue (MALT) lymphoma of stomach                 | Cancer |
| 4153892  | Secondary nodes - inguinal/leg                                               | Cancer |
| 4313754  | Adenoid cystic carcinoma of parotid gland                                    | Cancer |
| 40490467 | Follicular non-Hodgkin's lymphoma of extranodal site                         | Cancer |
| 4201618  | Metastasis from malignant tumor of rectum                                    | Cancer |
| 4311878  | Secondary malignant neoplasm of endocrine gland                              | Cancer |
| 4288534  | Small cell carcinoma of prostate                                             | Cancer |
| 4171274  | Malignant melanoma of rectum                                                 | Cancer |
| 37018649 | Primary squamous cell carcinoma of chest wall                                | Cancer |
| 4169627  | Squamous cell carcinoma of oral mucous membrane                              | Cancer |
| 4312547  | Secondary malignant neoplasm of lumbar vertebral column                      | Cancer |
| 433973   | Primary malignant neoplasm of bronchus of left lower lobe                    | Cancer |
| 4247948  | Secondary malignant neoplasm of thoracic vertebral column                    | Cancer |
| 4178960  | Carcinoma of tail of pancreas                                                | Cancer |
| 4201015  | Metastasis from malignant tumor of pancreas                                  | Cancer |
| 4197581  | Squamous cell carcinoma of bronchus in left upper lobe                       | Cancer |
| 40487487 | Ewing's sarcoma of soft tissue                                               | Cancer |
| 4229398  | Malignant optic glioma                                                       | Cancer |
| 4197601  | Seminoma of undescended testis                                               | Cancer |
| 4297356  | Primary cutaneous marginal zone B-cell lymphoma                              | Cancer |
| 4246474  | Malignant melanoma of skin of forehead                                       | Cancer |
| 4123298  | Malignant lymphoma, follicular center cell                                   | Cancer |
| 40486109 | Chordoma of sacrum                                                           | Cancer |
| 4196261  | Metastasis from malignant tumor of uterus                                    | Cancer |
| 4198434  | Local recurrence of malignant tumor of lung                                  | Cancer |
| 4247224  | Malignant melanoma of skin of thigh                                          | Cancer |
| 4112872  | Sarcoma of kidney                                                            | Cancer |
| 4221977  | Myxofibrosarcoma of skin                                                     | Cancer |
| 36712708 | Primary adenocarcinoma of upper lobe of left lung                            | Cancer |
| 4175531  | Sarcoma of breast                                                            | Cancer |
| 4162122  | Primary malignant neoplasm of vocal cord                                     | Cancer |
| 4082491  | Low grade T-cell lymphoma                                                    | Cancer |
| 4173985  | Malignant lymphoma of testis                                                 | Cancer |
| 36712725 | Infiltrating lobular carcinoma of right female breast                        | Cancer |
| 40489940 | Non-Hodgkin's lymphoma of skin                                               | Cancer |
| 4312151  | Secondary malignant neoplasm of axilla                                       | Cancer |
| 4094859  | Malignant neoplasm of pyloric canal of stomach                               | Cancer |
| 4157450  | Carcinoma of exocervix                                                       | Cancer |
| 40488904 | Non-Hodgkin's lymphoma of bone                                               | Cancer |
| 4112606  | Carcinoma of lower third of esophagus                                        | Cancer |
| 40489945 | Sarcoma upper outer quadrant of female breast                                | Cancer |
| 4164017  | Squamous cell carcinoma of prostate                                          | Cancer |
| 4246251  | Secondary malignant neoplasm of adrenal cortex                               | Cancer |

## SUPPORTING INFORMATION Newby 2022 Metformin versus sulfonylureas on Dementia and Parkinson's risk

|          |                                                                                |        |
|----------|--------------------------------------------------------------------------------|--------|
| 40493495 | Carcinoma of floor of mouth                                                    | Cancer |
| 4169288  | Squamous cell carcinoma of mucous membrane of lower lip                        | Cancer |
| 4324386  | Indolent systemic mastocytosis                                                 | Cancer |
| 40486168 | Lymphoma of sigmoid colon                                                      | Cancer |
| 4246801  | Primary malignant neoplasm of blood vessel                                     | Cancer |
| 4216891  | Hormone receptor positive malignant neoplasm of breast                         | Cancer |
| 4131931  | Malignant lymphoma of lymph nodes                                              | Cancer |
| 443561   | Malignant neoplasm of cerebrum                                                 | Cancer |
| 4171283  | Carcinoma of Bartholin's gland                                                 | Cancer |
| 4314458  | Anaplastic glioma of brain                                                     | Cancer |
| 4092215  | Malignant neoplasm of carina of bronchus                                       | Cancer |
| 4081867  | Acute biphenotypic leukemia                                                    | Cancer |
| 44791581 | Bowel cancer detected by national screening programme                          | Cancer |
| 44783845 | Malignant melanoma of nasal cavity                                             | Cancer |
| 4079691  | Diffuse low grade B-cell lymphoma                                              | Cancer |
| 40487049 | Sarcoma of pelvis                                                              | Cancer |
| 37395837 | Familial malignant neoplasm of pancreas                                        | Cancer |
| 380661   | Primary malignant neoplasm of cerebrum                                         | Cancer |
| 4311637  | Secondary malignant neoplasm of back                                           | Cancer |
| 4080381  | Malignant seminoma of mediastinum                                              | Cancer |
| 4045412  | Orbital lymphoma                                                               | Cancer |
| 4112963  | Astrocytoma of spinal cord                                                     | Cancer |
| 4312687  | Primary malignant neoplasm of skin of scalp                                    | Cancer |
| 4201014  | Metastasis from malignant tumor of cervix                                      | Cancer |
| 4173824  | B-cell chronic lymphocytic leukemia variant                                    | Cancer |
| 36713361 | Primary adenocarcinoma of ascending colon                                      | Cancer |
| 4111931  | Digital papillary eccrine carcinoma of skin                                    | Cancer |
| 4171273  | Malignant melanoma of anus                                                     | Cancer |
| 4180902  | Malignant tumor of soft tissue of face                                         | Cancer |
| 4173956  | Richter's syndrome                                                             | Cancer |
| 4201482  | Local recurrence of malignant tumor of colon                                   | Cancer |
| 4174763  | Early gastric cancer                                                           | Cancer |
| 4246124  | Primary malignant neoplasm of jaw                                              | Cancer |
| 4151310  | Malignant neoplasm of canthus                                                  | Cancer |
| 4112864  | Malignant germ cell tumor of ovary                                             | Cancer |
| 40487142 | Follicular non-Hodgkin's lymphoma of intestine                                 | Cancer |
| 37016162 | Primary adenocarcinoma of distal third of esophagus                            | Cancer |
| 4294441  | Anogenital verrucous carcinoma of Buschke-Löffler's disease                    | Cancer |
| 4111804  | Squamous cell carcinoma of trachea                                             | Cancer |
| 40488899 | Carcinoma of renal pelvis                                                      | Cancer |
| 4314053  | Secondary malignant neoplasm of stomach                                        | Cancer |
| 4298140  | Epithelioid hemangioendothelioma                                               | Cancer |
| 46270966 | Diffuse sclerosing papillary thyroid carcinoma                                 | Cancer |
| 46270923 | Carcinoma of central portion of breast                                         | Cancer |
| 45772951 | Primary basaloid squamous cell carcinoma of oropharynx                         | Cancer |
| 45772700 | Metastatic neuroblastoma                                                       | Cancer |
| 45771284 | Therapy-related myelodysplastic syndrome                                       | Cancer |
| 45771033 | Primary squamous cell carcinoma of hypopharyngeal aspect of aryepiglottic fold | Cancer |
| 45769123 | Nonkeratinizing carcinoma of the nasopharynx                                   | Cancer |
| 45769108 | Primary squamous cell carcinoma of posterior wall of hypopharynx               | Cancer |
| 45769095 | Pleuropulmonary blastoma type I                                                | Cancer |
| 45769059 | Overlapping squamous cell carcinoma of hypopharynx                             | Cancer |
| 45769035 | Primary carcinosarcoma of lung                                                 | Cancer |
| 45769026 | Primary squamous cell carcinoma of oropharynx                                  | Cancer |
| 45769017 | Primary squamous cell carcinoma of supraglottis                                | Cancer |
| 45768977 | Primary squamous cell carcinoma of nasopharynx                                 | Cancer |
| 45768951 | Primary squamous cell carcinoma of hypopharynx                                 | Cancer |
| 45768944 | Primary adenoid squamous cell carcinoma of hypopharynx                         | Cancer |
| 45768931 | Primary non-mucinous bronchiolo-alveolar carcinoma of lung                     | Cancer |
| 45768929 | Primary salivary gland type carcinoma of lung                                  | Cancer |
| 45768921 | Primary spindle cell carcinoma of lung                                         | Cancer |
| 45768920 | Primary undifferentiated carcinoma of lung                                     | Cancer |
| 45768899 | Overlapping squamous cell carcinoma of larynx                                  | Cancer |
| 45768898 | Primary verrucous carcinoma of larynx                                          | Cancer |
| 45768894 | Primary spindle cell squamous cell carcinoma of larynx                         | Cancer |
| 45768881 | Primary adenosquamous carcinoma of lung                                        | Cancer |
| 45768880 | Primary mixed subtype adenocarcinoma of lung                                   | Cancer |
| 45768839 | Primary squamous cell carcinoma of laryngeal cartilage                         | Cancer |
| 45768836 | Primary squamous cell carcinoma of accessory sinus                             | Cancer |
| 45768832 | Primary carcinoma of maxillary sinus                                           | Cancer |

## SUPPORTING INFORMATION Newby 2022 Metformin versus sulfonylureas on Dementia and Parkinson's risk

|          |                                                                         |        |
|----------|-------------------------------------------------------------------------|--------|
| 45765433 | Carcinosarcoma of ovary                                                 | Cancer |
| 44808015 | Follicular lymphoma grade 1                                             | Cancer |
| 44806268 | Refractory anaemia with multilineage dysplasia                          | Cancer |
| 44783285 | Endometrial stromal sarcoma                                             | Cancer |
| 44782609 | Primitive neuroectodermal tumor                                         | Cancer |
| 42709765 | Malignant melanoma of skin of upper arm                                 | Cancer |
| 42709763 | Primary malignant neoplasm of lower leg                                 | Cancer |
| 42709762 | Primary malignant neoplasm of skin of lower leg                         | Cancer |
| 42709756 | Malignant neoplasm of long bone of lower leg                            | Cancer |
| 42539527 | Primary cutaneous diffuse large cell B-cell lymphoma of lower extremity | Cancer |
| 42538693 | Primary endometrioid carcinoma of endometrium of body of uterus         | Cancer |
| 40493518 | Diffuse non-Hodgkin's lymphoma of bone                                  | Cancer |
| 40493514 | Diffuse non-Hodgkin's lymphoma of tonsil                                | Cancer |
| 40493432 | Sarcoma of bone of pelvis                                               | Cancer |
| 40493030 | Lymphoma of cardioesophageal junction                                   | Cancer |
| 40493028 | Carcinoma of corpus uteri                                               | Cancer |
| 40493027 | Gastrointestinal lymphoma                                               | Cancer |
| 40493006 | Lymphoma of lower esophagus                                             | Cancer |
| 40492933 | Carcinoma of brain                                                      | Cancer |
| 40492037 | Malignant neoplasm of intraabdominal organ                              | Cancer |
| 40492020 | Diffuse non-Hodgkin's lymphoma of lung                                  | Cancer |
| 40492018 | Follicular non-Hodgkin's lymphoma of skin                               | Cancer |
| 40491513 | Sarcoma of radius                                                       | Cancer |
| 40491472 | Non-Hodgkin's lymphoma of soft tissue                                   | Cancer |
| 40491444 | Sarcoma of femur                                                        | Cancer |
| 40490998 | Follicular non-Hodgkin's lymphoma of lung                               | Cancer |
| 40490994 | Malignant neoplasm of soft tissue of orbit                              | Cancer |
| 40490991 | Follicular non-Hodgkin's lymphoma of bone                               | Cancer |
| 40490988 | Diffuse non-Hodgkin's lymphoma of stomach                               | Cancer |
| 40490464 | Malignant teratoma of retroperitoneum                                   | Cancer |
| 40490463 | Malignant neoplasm of maxillofacial bone                                | Cancer |
| 40490460 | Lymphoma of body of stomach                                             | Cancer |
| 40490458 | Lymphoma of pelvis                                                      | Cancer |
| 40490009 | Transglottic malignant neoplasm of larynx                               | Cancer |
| 40489942 | Sarcoma of female breast                                                | Cancer |
| 40489928 | Sarcoma of central portion of female breast                             | Cancer |
| 40489897 | Sarcoma of upper inner quadrant of female breast                        | Cancer |
| 40489485 | Sarcoma of lower outer quadrant of female breast                        | Cancer |
| 40489484 | Non-Hodgkin's lymphoma of testis                                        | Cancer |
| 40489474 | Sarcoma of bone of foot                                                 | Cancer |
| 40489473 | Sarcoma of sacrum                                                       | Cancer |
| 40489468 | Non-Hodgkin's lymphoma of lung                                          | Cancer |
| 40489467 | Non-Hodgkin's lymphoma of nasopharynx                                   | Cancer |
| 40489448 | Non-Hodgkin's lymphoma of intestine                                     | Cancer |
| 40489409 | Diffuse non-Hodgkin's lymphoma of nasopharynx                           | Cancer |
| 40489407 | Follicular non-Hodgkin's lymphoma of soft tissue                        | Cancer |
| 40488990 | Malignant melanoma of skin of penis                                     | Cancer |
| 40488942 | Non-Hodgkin's lymphoma of central nervous system                        | Cancer |
| 40488906 | Sarcoma of fibula                                                       | Cancer |
| 40488902 | Malignant neoplasm of cerebellopontine angle                            | Cancer |
| 40488048 | Malignant neoplasm of alveolus of mandible                              | Cancer |
| 40487607 | Sarcoma of pelvic peritoneum                                            | Cancer |
| 40487596 | Carcinoma of mandible                                                   | Cancer |
| 40487580 | Malignant epithelial neoplasm of alveolus dentalis                      | Cancer |
| 40487140 | Carcinoma of nasal septum                                               | Cancer |
| 40486741 | Philadelphia chromosome negative chronic myelogenous leukemia           | Cancer |
| 40486656 | Malignant neoplasm of skin of scrotum                                   | Cancer |
| 40486640 | Sarcoma of skull                                                        | Cancer |
| 40486637 | Non-Hodgkin's lymphoma of tonsil                                        | Cancer |
| 40486590 | Lymphoma of cardia of stomach                                           | Cancer |
| 40486588 | Leiomyosarcoma of connective tissue                                     | Cancer |
| 40486583 | Adenocarcinoma of scrotum                                               | Cancer |
| 40486566 | Leiomyosarcoma of stomach                                               | Cancer |
| 40486564 | Sarcoma of peritoneum                                                   | Cancer |
| 40486535 | Angiosarcoma of cheek                                                   | Cancer |
| 40486224 | Sarcoma of rib                                                          | Cancer |
| 40486223 | Sarcoma of clavicle                                                     | Cancer |
| 40486174 | Malignant neoplasm of alveolus of maxilla                               | Cancer |
| 40486172 | Diffuse non-Hodgkin's lymphoma of central nervous system                | Cancer |
| 40486167 | Diffuse non-Hodgkin's lymphoma of skin                                  | Cancer |

## SUPPORTING INFORMATION Newby 2022 Metformin versus sulfonylureas on Dementia and Parkinson's risk

|          |                                                                             |        |
|----------|-----------------------------------------------------------------------------|--------|
| 40486161 | Carcinoma of face                                                           | Cancer |
| 40486156 | Sarcoma of humerus                                                          | Cancer |
| 40486155 | Sarcoma of tibia                                                            | Cancer |
| 40486118 | Paget's disease of skin of scrotum                                          | Cancer |
| 40486090 | Malignant melanoma of skin of anus                                          | Cancer |
| 40486088 | Dermatofibrosarcoma protuberans of skin of shoulder                         | Cancer |
| 40486085 | Malignant germ cell neoplasm of anterior mediastinum                        | Cancer |
| 40486083 | Leiomyosarcoma of scalp                                                     | Cancer |
| 40484129 | Mixed glioma                                                                | Cancer |
| 37397555 | Hereditary breast and ovarian cancer syndrome                               | Cancer |
| 37396736 | Embryonal sarcoma of liver                                                  | Cancer |
| 37396735 | Mixed oligoastrocytoma                                                      | Cancer |
| 37396219 | ALK-positive large B-cell lymphoma                                          | Cancer |
| 37395651 | Primary small cell malignant neoplasm of lung, TNM stage 4                  | Cancer |
| 37118088 | Nodal marginal zone B-cell lymphoma                                         | Cancer |
| 37116731 | Papillary renal cell carcinoma                                              | Cancer |
| 37116670 | Chromophobe renal cell carcinoma                                            | Cancer |
| 37116669 | Collecting duct carcinoma of kidney                                         | Cancer |
| 37116592 | Primary adenocarcinoma of biliary tract                                     | Cancer |
| 37018876 | Lymphoma of colon                                                           | Cancer |
| 37018872 | Primary squamous cell carcinoma of upper limb                               | Cancer |
| 37018667 | Astrocytoma of cerebrum                                                     | Cancer |
| 37018666 | Primary adenocarcinoma of vagina                                            | Cancer |
| 37018655 | Mucinous adenocarcinoma of gastrointestinal tract                           | Cancer |
| 37018650 | Primary adenocarcinoma of chest wall                                        | Cancer |
| 37018646 | Primary chondrosarcoma of bone of pelvis                                    | Cancer |
| 37018638 | Malignant glioma of cerebrum                                                | Cancer |
| 37018609 | Anaplastic astrocytoma of central nervous system                            | Cancer |
| 37018581 | Ewing sarcoma of bone of pelvis                                             | Cancer |
| 37018571 | Primary adenoid cystic carcinoma of nasopharynx                             | Cancer |
| 37017381 | Malignant germ cell tumor of testis                                         | Cancer |
| 37017114 | Malignant meningioma of meninges of brain                                   | Cancer |
| 37017016 | Malignant insulinoma                                                        | Cancer |
| 37016740 | Prostate cancer metastatic to bone                                          | Cancer |
| 37016662 | Malignant neoplasm of chest wall                                            | Cancer |
| 37016439 | Primary invasive malignant neoplasm of female breast                        | Cancer |
| 37016242 | Primary adenocarcinoma of endocervix                                        | Cancer |
| 37016239 | Primary adenocarcinoma of rectosigmoid junction                             | Cancer |
| 37016149 | Ganglioneuroblastoma                                                        | Cancer |
| 37016125 | Primary adenosquamous carcinoma of endometrium                              | Cancer |
| 37016124 | Primary malignant clear cell neoplasm of endometrium                        | Cancer |
| 37016123 | Primary malignant mixed Mullerian neoplasm of endometrium                   | Cancer |
| 37016118 | Astrocytoma of brain stem                                                   | Cancer |
| 36717624 | Primary glioblastoma multiforme of frontal lobe                             | Cancer |
| 36717579 | Primary serous carcinoma of uterine adnexa                                  | Cancer |
| 36717495 | Primary adenocarcinoma of descending colon and splenic flexure              | Cancer |
| 36717487 | Primary embryonal carcinoma of testis                                       | Cancer |
| 36717227 | Primary serous adenocarcinoma of endometrium                                | Cancer |
| 36717226 | Primary squamous cell carcinoma of parotid gland                            | Cancer |
| 36717182 | Primary neuroendocrine carcinoma of rectum                                  | Cancer |
| 36717177 | Primary adenocarcinoma of pyloric antrum of stomach                         | Cancer |
| 36717176 | Primary adenocarcinoma of esophagogastric junction                          | Cancer |
| 36716855 | Primary myxofibrosarcoma                                                    | Cancer |
| 36716618 | Primary high grade serous adenocarcinoma of ovary                           | Cancer |
| 36716614 | Primary mucinous adenocarcinoma of endometrium                              | Cancer |
| 36716502 | Primary squamous cell carcinoma of pharyngeal tonsil                        | Cancer |
| 36716489 | Primary leiomyosarcoma of peritoneum                                        | Cancer |
| 36716193 | Primary squamous cell carcinoma of ear                                      | Cancer |
| 36715966 | Adult T-cell leukemia/lymphoma of skin                                      | Cancer |
| 36715914 | Primary malignant neuroendocrine neoplasm of rectum                         | Cancer |
| 36715911 | Primary adenocarcinoma of ascending colon and right flexure                 | Cancer |
| 36715891 | Primary malignant neuroendocrine neoplasm of appendix                       | Cancer |
| 36715846 | Primary squamous cell carcinoma of lower third of esophagus                 | Cancer |
| 36715844 | Primary adenocarcinoma of lower third of esophagus due to Barrett esophagus | Cancer |
| 36715797 | Primary adenocarcinoma of parotid gland                                     | Cancer |
| 36715586 | Refractory thrombocytopenia                                                 | Cancer |
| 36713996 | Recurrent squamous cell carcinoma                                           | Cancer |
| 36713366 | Extensive stage primary small cell carcinoma of lung                        | Cancer |
| 36713363 | Primary adenocarcinoma of head of pancreas                                  | Cancer |
| 4345328  | African Burkitt's lymphoma                                                  | Cancer |

## SUPPORTING INFORMATION Newby 2022 Metformin versus sulfonylureas on Dementia and Parkinson's risk

|         |                                                               |        |
|---------|---------------------------------------------------------------|--------|
| 4340498 | Cystadenocarcinoma of pancreas                                | Cancer |
| 4334256 | Lymphoma of retina                                            | Cancer |
| 4326339 | Smoldering chronic lymphocytic leukemia                       | Cancer |
| 4315808 | Secondary malignant neoplasm of thoracic esophagus            | Cancer |
| 4315678 | Secondary malignant neoplasm of skin of back                  | Cancer |
| 4315677 | Secondary malignant neoplasm of sigmoid colon                 | Cancer |
| 4315670 | Secondary malignant neoplasm of renal pelvis                  | Cancer |
| 4315663 | Secondary malignant neoplasm of pharynx                       | Cancer |
| 4315657 | Secondary malignant neoplasm of parametrial lymph nodes       | Cancer |
| 4315541 | Secondary malignant neoplasm of muscle of abdomen             | Cancer |
| 4315538 | Secondary malignant neoplasm of maxillary sinus               | Cancer |
| 4314478 | Secondary malignant neoplasm of soft tissues of pelvis        | Cancer |
| 4314361 | Secondary malignant neoplasm of soft tissues of abdomen       | Cancer |
| 4314349 | Secondary malignant neoplasm of skin of abdomen               | Cancer |
| 4314348 | Secondary malignant neoplasm of shoulder                      | Cancer |
| 4314345 | Secondary malignant neoplasm of scrotum                       | Cancer |
| 4314343 | Secondary malignant neoplasm of sacrum                        | Cancer |
| 4314342 | Secondary malignant neoplasm of right upper lobe of lung      | Cancer |
| 4314341 | Secondary malignant neoplasm of retropharyngeal lymph nodes   | Cancer |
| 4314201 | Mixed cell type lymphosarcoma of intra-abdominal lymph nodes  | Cancer |
| 4314073 | Secondary malignant neoplasm of upper limb                    | Cancer |
| 4314068 | Secondary malignant neoplasm of transverse colon              | Cancer |
| 4314067 | Secondary malignant neoplasm of tracheobronchial lymph nodes  | Cancer |
| 4314062 | Secondary malignant neoplasm of the mesentery                 | Cancer |
| 4314061 | Secondary malignant neoplasm of temporal lobe                 | Cancer |
| 4314057 | Secondary malignant neoplasm of supraclavicular region        | Cancer |
| 4314052 | Secondary malignant neoplasm of splenic flexure of colon      | Cancer |
| 4314050 | Secondary malignant neoplasm of sphenoidal sinus              | Cancer |
| 4314040 | Large cell carcinoma of lung, TNM stage 1                     | Cancer |
| 4313937 | Secondary malignant neoplasm of skin of trunk                 | Cancer |
| 4313926 | Secondary malignant neoplasm of right lower lobe of lung      | Cancer |
| 4313921 | Secondary malignant neoplasm of posterior hypopharyngeal wall | Cancer |
| 4313917 | Secondary malignant neoplasm of penis                         | Cancer |
| 4313915 | Secondary malignant neoplasm of pelvic peritoneum             | Cancer |
| 4313914 | Secondary malignant neoplasm of pelvic bone                   | Cancer |
| 4313913 | Secondary malignant neoplasm of parietal lobe                 | Cancer |
| 4313887 | Primary leiomyosarcoma                                        | Cancer |
| 4313766 | Malignant melanoma of retina                                  | Cancer |
| 4313214 | Secondary malignant neoplasm of long bone of lower limb       | Cancer |
| 4313212 | Secondary malignant neoplasm of left upper lobe of lung       | Cancer |
| 4313211 | Secondary malignant neoplasm of left lower lobe of lung       | Cancer |
| 4313079 | Secondary malignant neoplasm of gallbladder                   | Cancer |
| 4312954 | Secondary malignant neoplasm of eye                           | Cancer |
| 4312944 | Secondary malignant neoplasm of soft tissues                  | Cancer |
| 4312940 | Secondary malignant neoplasm of cheek                         | Cancer |
| 4312937 | Secondary malignant neoplasm of cauda equina                  | Cancer |
| 4312929 | Polymorphous low grade adenocarcinoma of salivary gland       | Cancer |
| 4312923 | Squamous cell carcinomatosis                                  | Cancer |
| 4312823 | Secondary malignant neoplasm of bone of skull                 | Cancer |
| 4312768 | Large cell carcinoma of lung, TNM stage 3                     | Cancer |
| 4312701 | Secondary malignant neoplasm of anterior mediastinum          | Cancer |
| 4312699 | Secondary malignant neoplasm of acromion                      | Cancer |
| 4312695 | Primary malignant neoplasm of tibia                           | Cancer |
| 4312693 | Primary malignant neoplasm of temporal bone                   | Cancer |
| 4312683 | Primary malignant neoplasm of skin of forearm                 | Cancer |
| 4312675 | Primary malignant neoplasm of sacrococcygeal region           | Cancer |
| 4312640 | Malignant tumor of spinal cord, intramedullary                | Cancer |
| 4312562 | Secondary malignant neoplasm of parietal peritoneum           | Cancer |
| 4312560 | Secondary malignant neoplasm of orbit                         | Cancer |
| 4312558 | Secondary malignant neoplasm of obturator lymph nodes         | Cancer |
| 4312550 | Secondary malignant neoplasm of mouth                         | Cancer |
| 4312429 | Secondary malignant neoplasm of hilus of lung                 | Cancer |
| 4312395 | Cancer of vulva, disseminated                                 | Cancer |
| 4312303 | Secondary malignant neoplasm of femoral lymph nodes           | Cancer |
| 4312289 | Secondary malignant neoplasm of cerebellum                    | Cancer |
| 4312284 | Secondary malignant neoplasm of bronchus                      | Cancer |
| 4312282 | Secondary malignant neoplasm of bronchus of left upper lobe   | Cancer |
| 4312280 | Secondary malignant neoplasm of brain stem                    | Cancer |
| 4312279 | Secondary malignant neoplasm of bone of lower limb            | Cancer |
| 4312150 | Secondary malignant neoplasm of ascending colon               | Cancer |
| 4312024 | Secondary malignant neoplasm of intrahepatic bile ducts       | Cancer |



## SUPPORTING INFORMATION Newby 2022 Metformin versus sulfonylureas on Dementia and Parkinson's risk

|         |                                                                         |        |
|---------|-------------------------------------------------------------------------|--------|
| 4312017 | Secondary malignant neoplasm of head of pancreas                        | Cancer |
| 4312004 | Primary malignant neoplasm of lacrimal gland duct                       | Cancer |
| 4311880 | Secondary malignant neoplasm of esophagus                               | Cancer |
| 4311879 | Secondary malignant neoplasm of endometrium                             | Cancer |
| 4311872 | Lymphoma of retroperitoneal space                                       | Cancer |
| 4311762 | Secondary malignant neoplasm of bone of upper limb                      | Cancer |
| 4311638 | Secondary malignant neoplasm of biliary tract                           | Cancer |
| 4311635 | Secondary malignant neoplasm of appendix                                | Cancer |
| 4311632 | Secondary malignant neoplasm of adenoid                                 | Cancer |
| 4311627 | Primary malignant neoplasm of uveal tract                               | Cancer |
| 4311626 | Primary malignant neoplasm of ulna                                      | Cancer |
| 4311617 | Primary malignant neoplasm of skin of nose                              | Cancer |
| 4311502 | Primary malignant neoplasm of scapula                                   | Cancer |
| 4311497 | Primary malignant neoplasm of perianal skin                             | Cancer |
| 4311492 | Primary malignant neoplasm of muscle                                    | Cancer |
| 4311481 | Primary malignant neoplasm of inguinal region                           | Cancer |
| 4311472 | Secondary malignant neoplasm of thymus                                  | Cancer |
| 4311348 | Secondary malignant neoplasm of testis                                  | Cancer |
| 4311347 | Secondary malignant neoplasm of tail of pancreas                        | Cancer |
| 4311344 | Secondary malignant neoplasm of sternum                                 | Cancer |
| 4311332 | Secondary malignant neoplasm of skin of chest                           | Cancer |
| 4311328 | Secondary malignant neoplasm of scapula                                 | Cancer |
| 4311326 | Secondary malignant neoplasm of rib                                     | Cancer |
| 4311211 | Secondary malignant neoplasm of popliteal lymph nodes                   | Cancer |
| 4311209 | Secondary malignant neoplasm of pituitary gland                         | Cancer |
| 4310839 | Malignant melanoma of skin of lower lip                                 | Cancer |
| 4310714 | Malignant melanoma of unknown origin                                    | Cancer |
| 4310595 | Small cell carcinoma carcinomatosis                                     | Cancer |
| 4310565 | Mucoepidermoid carcinoma of submandibular gland                         | Cancer |
| 4309851 | Malignant tumor of spinal cord, extramedullary                          | Cancer |
| 4309817 | Invasive vulval Paget's disease                                         | Cancer |
| 4309707 | Sarcoma of head and neck                                                | Cancer |
| 4309385 | Carcinoma of nasal meatus                                               | Cancer |
| 4309088 | Malignant melanoma of skin of upper lip                                 | Cancer |
| 4308627 | Adenoid cystic carcinoma of oropharynx                                  | Cancer |
| 4308015 | Adenocarcinoma of pelvis                                                | Cancer |
| 4307986 | Sarcoma of ovary                                                        | Cancer |
| 4307983 | Rhabdomyosarcoma of connective or soft tissue                           | Cancer |
| 4307407 | Carcinoma of tip of nose                                                | Cancer |
| 4307118 | Large cell carcinoma of lung, TNM stage 2                               | Cancer |
| 4306501 | Undifferentiated carcinoma of nasopharynx                               | Cancer |
| 4302810 | Secondary malignant neoplasm of lacrimal drainage structure             | Cancer |
| 4302482 | Squamous cell carcinoma of mucous membrane of upper lip                 | Cancer |
| 4301670 | Mantle cell B-cell lymphoma                                             | Cancer |
| 4301669 | Primary cutaneous anaplastic large cell B-cell lymphoma                 | Cancer |
| 4301667 | Small lymphocytic B-cell lymphoma involving skin                        | Cancer |
| 4301663 | Bullous mycosis fungoides                                               | Cancer |
| 4301661 | Follicular mucinosis type mycosis fungoides                             | Cancer |
| 4301656 | Malignant infiltration of oral cavity by underlying tumor               | Cancer |
| 4301655 | Carcinosarcoma of skin                                                  | Cancer |
| 4301648 | Alveolar soft part sarcoma                                              | Cancer |
| 4301647 | Pleomorphic rhabdomyosarcoma                                            | Cancer |
| 4301538 | Superficial malignant fibrous histiocytoma of skin                      | Cancer |
| 4301517 | Perianal Paget's disease                                                | Cancer |
| 4301512 | Trichilemmal carcinoma                                                  | Cancer |
| 4301511 | Spindle cell malignant melanoma                                         | Cancer |
| 4301428 | Spindle cell squamous cell carcinoma                                    | Cancer |
| 4300783 | Lymphoplasmacytic B-cell lymphoma, nodal/systemic with skin involvement | Cancer |
| 4300702 | Primary cutaneous plasmacytoma                                          | Cancer |
| 4300696 | Lymphomatoid papulosis-associated mycosis fungoides                     | Cancer |
| 4300695 | Patch/plaque stage mycosis fungoides                                    | Cancer |
| 4300694 | Lymphomatoid papulosis with Hodgkin's disease                           | Cancer |
| 4300687 | Pleomorphic liposarcoma                                                 | Cancer |
| 4300670 | Malignant fibrous histiocytoma of skin                                  | Cancer |
| 4300585 | Infantile fibrosarcoma                                                  | Cancer |
| 4300570 | Eccrine ductal carcinoma                                                | Cancer |
| 4300554 | Verrucous carcinoma of oral cavity                                      | Cancer |
| 4299430 | Malignant melanoma of soft tissues                                      | Cancer |
| 4299147 | CD-30 negative anaplastic large T-cell cutaneous lymphoma               | Cancer |
| 4299141 | Mycosis fungoides with systemic infiltration                            | Cancer |

## SUPPORTING INFORMATION Newby 2022 Metformin versus sulfonylureas on Dementia and Parkinson's risk

|         |                                                                                          |        |
|---------|------------------------------------------------------------------------------------------|--------|
| 4299134 | Sarcomatous metastasis in skin                                                           | Cancer |
| 4298846 | Malignant fibrohistiocytic tumor of skin                                                 | Cancer |
| 4298240 | Extraskeletal osteosarcoma                                                               | Cancer |
| 4298233 | Myxoid leiomyosarcoma of skin                                                            | Cancer |
| 4298154 | Malignant granular cell tumor                                                            | Cancer |
| 4298141 | Lymphangiosarcoma                                                                        | Cancer |
| 4298128 | Apocrine adenocarcinoma of skin                                                          | Cancer |
| 4298030 | Verrucous squamous cell carcinoma                                                        | Cancer |
| 4297358 | Primary cutaneous diffuse large cell B-cell lymphoma                                     | Cancer |
| 4297348 | Low-grade fibromyxoid sarcoma                                                            | Cancer |
| 4297346 | Extraskeletal mesenchymal chondrosarcoma                                                 | Cancer |
| 4297345 | Extraskeletal myxoid chondrosarcoma                                                      | Cancer |
| 4297343 | Spindle cell liposarcoma                                                                 | Cancer |
| 4297342 | Round cell liposarcoma                                                                   | Cancer |
| 4297338 | Spindle cell rhabdomyosarcoma                                                            | Cancer |
| 4297189 | Malignant melanoma of nail apparatus                                                     | Cancer |
| 4297188 | Malignant melanoma of oral cavity                                                        | Cancer |
| 4297187 | Borderline malignant melanoma                                                            | Cancer |
| 4295623 | Squamous cell carcinoma of vulva due to lichen sclerosus                                 | Cancer |
| 4294434 | Primary cutaneous large T-cell lymphoma                                                  | Cancer |
| 4294181 | Adenoma malignum                                                                         | Cancer |
| 4292390 | Multiple primary malignant melanomata                                                    | Cancer |
| 4292389 | Metastatic malignant melanoma with diffuse hypermelanosis                                | Cancer |
| 4290984 | Eccrine carcinoma of skin                                                                | Cancer |
| 4289824 | Malignant tumor involving right ovary by separate metastasis from fallopian tube         | Cancer |
| 4289381 | Malignant tumor involving prostate by separate metastasis from bladder                   | Cancer |
| 4289249 | Malignant tumor involving rectum by separate metastasis from prostate                    | Cancer |
| 4289096 | Malignant tumor involving urethra by separate metastasis from prostate                   | Cancer |
| 4289092 | Malignant tumor involving rectum by direct extension from vagina                         | Cancer |
| 4283748 | Primary malignant neoplasm of right fallopian tube                                       | Cancer |
| 4283742 | Malignant tumor involving uterine cervix by direct extension from vagina                 | Cancer |
| 4283738 | Malignant tumor involving prostate by direct extension from bladder                      | Cancer |
| 4283614 | Malignant tumor involving bladder by direct extension from prostate                      | Cancer |
| 4283611 | Malignant tumor involving rectum by direct extension from endometrium                    | Cancer |
| 4281159 | Malignant tumor involving right ovary by direct extension from uterus                    | Cancer |
| 4281025 | Malignant tumor involving left fallopian tube by direct extension from ovary             | Cancer |
| 4281018 | Malignant tumor involving bladder by separate metastasis from prostate                   | Cancer |
| 4280899 | Malignant tumor involving bladder by direct extension from endometrium                   | Cancer |
| 4280897 | Malignant tumor involving urethra by direct extension from prostate                      | Cancer |
| 4266390 | Mu heavy chain disease                                                                   | Cancer |
| 4264694 | Systemic mastocytosis with associated clonal hematological non-mast cell lineage disease | Cancer |
| 4258546 | Siewert type III adenocarcinoma of esophagogastric junction                              | Cancer |
| 4248199 | Secondary malignant neoplasm of pericardium                                              | Cancer |
| 4248197 | Secondary malignant neoplasm of parietal pleura                                          | Cancer |
| 4248186 | Secondary malignant neoplasm of occipital lobe                                           | Cancer |
| 4248182 | Secondary malignant neoplasm of muscle                                                   | Cancer |
| 4248060 | Secondary malignant neoplasm of intercostal lymph nodes                                  | Cancer |
| 4248055 | Secondary malignant neoplasm of hypogastric lymph nodes                                  | Cancer |
| 4247967 | Secondary malignant neoplasm of heart                                                    | Cancer |
| 4247850 | Primary malignant neoplasm of pericardium                                                | Cancer |
| 4247846 | Primary malignant neoplasm of occipital bone                                             | Cancer |
| 4247831 | Primary malignant neoplasm of laryngeal surface of epiglottis                            | Cancer |
| 4247830 | Primary malignant neoplasm of laryngeal commissure                                       | Cancer |
| 4247824 | Primary malignant neoplasm of cystic duct                                                | Cancer |
| 4247727 | Primary malignant neoplasm of bronchus of right lower lobe                               | Cancer |
| 4247715 | Malignant melanoma of skin of toe                                                        | Cancer |
| 4247714 | Malignant melanoma of skin of shoulder                                                   | Cancer |
| 4247713 | Malignant melanoma of skin of knee                                                       | Cancer |
| 4247346 | Primary malignant neoplasm of skin of ankle                                              | Cancer |
| 4247341 | Primary malignant neoplasm of pubis                                                      | Cancer |
| 4247339 | Primary malignant neoplasm of parietal bone                                              | Cancer |
| 4247338 | Primary malignant neoplasm of nose                                                       | Cancer |

## SUPPORTING INFORMATION Newby 2022 Metformin versus sulfonylureas on Dementia and Parkinson's risk

|         |                                                                |        |
|---------|----------------------------------------------------------------|--------|
| 4247242 | Primary malignant neoplasm of glomus jugulare                  | Cancer |
| 4247239 | Primary malignant neoplasm of ethmoid bone                     | Cancer |
| 4247226 | Malignant melanoma of skin of wrist                            | Cancer |
| 4247221 | Malignant melanoma of skin of hand                             | Cancer |
| 4246924 | Primary malignant neoplasm of fibula                           | Cancer |
| 4246805 | Primary malignant neoplasm of bronchus of right upper lobe     | Cancer |
| 4246804 | Primary malignant neoplasm of bronchus of right middle lobe    | Cancer |
| 4246794 | Primary malignant neoplasm of adnexa of skin                   | Cancer |
| 4246793 | Primary malignant neoplasm of adenoid                          | Cancer |
| 4246792 | Malignant melanoma of skin of temporal region                  | Cancer |
| 4246473 | Malignant melanoma of skin of elbow                            | Cancer |
| 4246458 | Secondary malignant neoplasm of choroid                        | Cancer |
| 4246457 | Secondary malignant neoplasm of cervical vertebral column      | Cancer |
| 4246453 | Secondary malignant neoplasm of bronchus of right lower lobe   | Cancer |
| 4246352 | Secondary malignant neoplasm of axillary tail of female breast | Cancer |
| 4246350 | Secondary malignant neoplasm of areola of female breast        | Cancer |
| 4246239 | Primary malignant neoplasm of talus                            | Cancer |
| 4246238 | Primary malignant neoplasm of sweat gland                      | Cancer |
| 4246236 | Primary malignant neoplasm of sphenoid bone                    | Cancer |
| 4246230 | Primary malignant neoplasm of skin of eyebrow                  | Cancer |
| 4246227 | Primary malignant neoplasm of skin of cheek                    | Cancer |
| 4246226 | Primary malignant neoplasm of shoulder                         | Cancer |
| 4246225 | Primary malignant neoplasm of septum of nose                   | Cancer |
| 4246140 | Primary malignant neoplasm of parietal peritoneum              | Cancer |
| 4246136 | Primary malignant neoplasm of nasal bone                       | Cancer |
| 4246122 | Primary malignant neoplasm of ilium                            | Cancer |
| 4246120 | Primary malignant neoplasm of hand                             | Cancer |
| 4246040 | Primary malignant neoplasm of forearm                          | Cancer |
| 4246036 | Primary malignant neoplasm of ectopic female breast tissue     | Cancer |
| 4246032 | Primary malignant neoplasm of chest wall                       | Cancer |
| 4246031 | Primary malignant neoplasm of cheek                            | Cancer |
| 4246027 | Primary malignant neoplasm of bronchus of left upper lobe      | Cancer |
| 4246017 | Primary malignant neoplasm of back                             | Cancer |
| 4246016 | Primary malignant neoplasm of axilla                           | Cancer |
| 4246015 | Primary malignant neoplasm of alveolar ridge mucosa            | Cancer |
| 4246013 | Primary malignant neoplasm of acoustic nerve                   | Cancer |
| 4245919 | Malignant melanoma of skin of groin                            | Cancer |
| 4245467 | Malignant melanoma of skin of buttock                          | Cancer |
| 4244169 | Malignant melanoma of skin of foot                             | Cancer |
| 4244168 | Malignant melanoma of skin of finger                           | Cancer |
| 4244167 | Malignant melanoma of skin of chin                             | Cancer |
| 4234749 | Acute myeloid leukemia with maturation, FAB M2                 | Cancer |
| 4230395 | Metastatic malignant neoplasm to dome of urinary bladder       | Cancer |
| 4230394 | Metastatic malignant neoplasm to apex of urinary bladder       | Cancer |
| 4230253 | Acute myeloid leukemia without maturation, FAB M1              | Cancer |
| 4227209 | Primary intraocular non-Hodgkin malignant lymphoma             | Cancer |
| 4220833 | Reactive immunoproliferative disease                           | Cancer |
| 4216500 | Anaplasia of cervix                                            | Cancer |
| 4211481 | Blastic phase chronic myeloid leukemia                         | Cancer |
| 4208017 | Siewert type I adenocarcinoma of esophagogastric junction      | Cancer |
| 4207920 | Malignant neoplasm of skin of scapular region                  | Cancer |
| 4207131 | Siewert type II adenocarcinoma of esophagogastric junction     | Cancer |
| 4206830 | Primary osteosarcoma of pelvis                                 | Cancer |
| 4201615 | Local recurrence of malignant tumor of soft tissue             | Cancer |
| 4201481 | Local recurrence of malignant tumor of pancreas                | Cancer |
| 4201480 | Local recurrence of malignant tumor of esophagus               | Cancer |
| 4201476 | Local recurrence of malignant tumor of buccal cavity           | Cancer |
| 4201475 | Local recurrence of malignant tumor of tongue                  | Cancer |
| 4201020 | Metastasis from malignant tumor of bronchus                    | Cancer |
| 4200894 | Metastasis from malignant tumor of skin                        | Cancer |
| 4198444 | Metastasis from malignant tumor of gallbladder                 | Cancer |
| 4198437 | Local recurrence of malignant melanoma of skin                 | Cancer |
| 4198436 | Local recurrence of malignant tumor of skin                    | Cancer |
| 4196725 | Squamous cell carcinoma of bronchus in right lower lobe        | Cancer |
| 4196724 | Squamous cell carcinoma of bronchus in left lower lobe         | Cancer |
| 4196260 | Metastasis from malignant tumor of adrenal gland               | Cancer |
| 4196258 | Metastasis from malignant tumor of soft tissues                | Cancer |
| 4190642 | Plasma cell myeloma/plasmacytoma                               | Cancer |
| 4188975 | Chronic phase chronic myeloid leukemia                         | Cancer |
| 4188973 | Chronic myeloid leukemia in lymphoid blast crisis              | Cancer |
| 4187635 | Accelerated phase chronic myeloid leukemia                     | Cancer |

## SUPPORTING INFORMATION Newby 2022 Metformin versus sulfonylureas on Dementia and Parkinson's risk

|         |                                                                            |        |
|---------|----------------------------------------------------------------------------|--------|
| 4183913 | Malignant tumor involving an organ by direct extension from prostate       | Cancer |
| 4183745 | Malignant tumor involving an organ by separate metastasis from prostate    | Cancer |
| 4182918 | Malignant tumor involving an organ by separate metastasis from endometrium | Cancer |
| 4181346 | Malignant tumor of mastoid air cells                                       | Cancer |
| 4181330 | Malignant tumor of soft tissue of thorax                                   | Cancer |
| 4181329 | Malignant tumor of soft tissue of hip                                      | Cancer |
| 4180915 | Malignant tumor of urinary tract proper                                    | Cancer |
| 4180781 | Malignant tumor of soft tissue of shoulder                                 | Cancer |
| 4179094 | Malignant tumor of soft tissue of abdomen                                  | Cancer |
| 4177239 | Malignant tumor of muscle                                                  | Cancer |
| 4177237 | Malignant tumor of false cord                                              | Cancer |
| 4175532 | Malignant Leydig cell tumor of testis                                      | Cancer |
| 4175529 | Sarcoma of bladder                                                         | Cancer |
| 4174764 | Late gastric cancer                                                        | Cancer |
| 4173977 | Follicular malignant lymphoma - mixed cell type                            | Cancer |
| 4173800 | Carcinoma anterior 2/3 tongue ventrum                                      | Cancer |
| 4173799 | Carcinoma ventral surface of tongue                                        | Cancer |
| 4173358 | Malignant tumor of skin with pilar differentiation                         | Cancer |
| 4173353 | Primary signet ring carcinoma of skin                                      | Cancer |
| 4172846 | Malignant tumor of corpus cavernosum                                       | Cancer |
| 4171275 | Malignant glioma of spinal cord                                            | Cancer |
| 4170451 | Malignant tumor of lipstick area of lip                                    | Cancer |
| 4170450 | Carcinoma of anterior two-thirds of tongue - dorsal surface                | Cancer |
| 4166589 | Metastasis to digestive organs                                             | Cancer |
| 4162995 | Carcinoma of skin of upper limb                                            | Cancer |
| 4162992 | Carcinoma of ribs and/or sternum and/or clavicle                           | Cancer |
| 4162978 | Pigmented dermatofibrosarcoma protuberans of skin                          | Cancer |
| 4162861 | Primary malignant neoplasm of minor salivary gland                         | Cancer |
| 4162250 | Carcinoma of main bronchus                                                 | Cancer |
| 4162248 | Carcinoma of middle lobe, bronchus or lung                                 | Cancer |
| 4161912 | Adamantinoma of femur                                                      | Cancer |
| 4158253 | Anaplastic astrocytoma of spinal cord                                      | Cancer |
| 4157451 | Carcinoma of glottis                                                       | Cancer |
| 4157319 | Malignant tumor of soft tissue of upper limb                               | Cancer |
| 4155296 | Carcinoma of skin of trunk                                                 | Cancer |
| 4155295 | Carcinoma of skin of lower limb                                            | Cancer |
| 4155169 | Primary malignant neoplasm of false vocal cord                             | Cancer |
| 4149450 | Malignant tumor of soft tissue of back                                     | Cancer |
| 4146031 | Malignant lymphoma, lymphocytic, poorly differentiated, nodular            | Cancer |
| 4146027 | Malignant lymphoma, mixed lymphocytic-histiocytic, nodular                 | Cancer |
| 4146024 | Malignant lymphoma - centrocytic                                           | Cancer |
| 4146022 | Neutrophilic leukemia                                                      | Cancer |
| 4145865 | Perforated carcinoma of esophagus                                          | Cancer |
| 4144191 | Basophilic leukemia                                                        | Cancer |
| 4143896 | Monosomy 7 syndrome                                                        | Cancer |
| 4143825 | Epidermal growth factor receptor positive non-small cell lung cancer       | Cancer |
| 4142105 | Acute myelomonocytic leukemia, FAB M4, in remission                        | Cancer |
| 4141250 | Pilomatrix carcinoma of skin                                               | Cancer |
| 4140471 | Epidermal growth factor receptor negative non-small cell lung cancer       | Cancer |
| 4138903 | Acute myeloid leukemia with maturation, FAB M2, in remission               | Cancer |
| 4137510 | Osteosclerotic myeloma                                                     | Cancer |
| 4131920 | Familial polycythemia vera                                                 | Cancer |
| 4121330 | Diffuse malignant lymphoma - centroblastic                                 | Cancer |
| 4120590 | Carcinoma of genital organ                                                 | Cancer |
| 4120589 | Carcinoma of lower limb bones                                              | Cancer |
| 4120588 | Carcinoma of upper limb bones/scapula                                      | Cancer |
| 4119610 | Pulmonary tumor embolism                                                   | Cancer |
| 4116348 | Metastasis to nervous system and eye                                       | Cancer |
| 4116244 | Malignant tumor of epidermal appendage                                     | Cancer |
| 4116239 | Malignant tumor of esophagus, stomach and duodenum                         | Cancer |
| 4116219 | Liposarcoma of orbit                                                       | Cancer |
| 4116088 | Carcinoma of glans penis                                                   | Cancer |
| 4116070 | Malignant lipomatous tumor                                                 | Cancer |
| 4116069 | Malignant tumor of mesothelial tissue                                      | Cancer |
| 4115266 | Carcinoma of body of stomach                                               | Cancer |
| 4115137 | Malignant tumor of anterior pillar of fauces                               | Cancer |
| 4114341 | Secondary lymphangitic carcinoma                                           | Cancer |
| 4114201 | Adenoid cystic carcinoma of lacrimal gland                                 | Cancer |
| 4114193 | Pituitary carcinoma                                                        | Cancer |
| 4113638 | Carcinoma of breast - axillary tail                                        | Cancer |

## SUPPORTING INFORMATION Newby 2022 Metformin versus sulfonylureas on Dementia and Parkinson's risk

|         |                                                                      |        |
|---------|----------------------------------------------------------------------|--------|
| 4112969 | Malignant meningioma of optic nerve sheath                           | Cancer |
| 4112879 | Cystadenocarcinoma of kidney                                         | Cancer |
| 4112871 | Malignant tumor of skin of penis                                     | Cancer |
| 4112865 | Choriocarcinoma of ovary                                             | Cancer |
| 4112781 | Metastasis to adrenal gland of unknown primary                       | Cancer |
| 4112776 | Metastasis to peritoneum of unknown primary                          | Cancer |
| 4112774 | Metastasis to pancreas of unknown primary                            | Cancer |
| 4112753 | Eccrine porocarcinoma                                                | Cancer |
| 4112736 | Adenoid cystic carcinoma of trachea                                  | Cancer |
| 4112730 | Malignant tumor of anorectal junction                                | Cancer |
| 4112609 | Carcinoma of greater curve of stomach                                | Cancer |
| 4112593 | Malignant tumor of middle turbinate                                  | Cancer |
| 4112581 | Carcinoma of lingual tonsil                                          | Cancer |
| 4112488 | Metastasis to skin of unknown primary                                | Cancer |
| 4112075 | Cancer en cuirasse                                                   | Cancer |
| 4111949 | Epithelioid cell sarcoma of skin                                     | Cancer |
| 4111948 | Angiosarcoma of skin                                                 | Cancer |
| 4111943 | Cutaneous leiomyosarcoma                                             | Cancer |
| 4111933 | Mucoepidermoid carcinoma of skin                                     | Cancer |
| 4111932 | Adenoid cystic eccrine carcinoma                                     | Cancer |
| 4111920 | Malignant epithelial neoplasm of skin                                | Cancer |
| 4111783 | Carcinoma of retromolar area                                         | Cancer |
| 4111649 | Malignant tumor of tip of tongue                                     | Cancer |
| 4111031 | Metastasis to peripheral nerve                                       | Cancer |
| 4111027 | Angioendotheliomatosis                                               | Cancer |
| 4111024 | Malignant tumor of exocrine pancreas                                 | Cancer |
| 4111005 | Malignant melanoma of iris                                           | Cancer |
| 4110891 | Rhabdomyosarcoma of orbit                                            | Cancer |
| 4110877 | Carcinoma of foreskin                                                | Cancer |
| 4110875 | Sarcoma of vulva                                                     | Cancer |
| 4110863 | Undifferentiated carcinoma of ovary                                  | Cancer |
| 4110733 | Peripheral neuroepithelioma                                          | Cancer |
| 4110726 | Acral lentiginous malignant melanoma of skin                         | Cancer |
| 4110722 | Microcystic adnexal carcinoma                                        | Cancer |
| 4110572 | Carcinoma of pyloric antrum                                          | Cancer |
| 4110568 | Carcinoma of thoracic part of esophagus                              | Cancer |
| 4110566 | Malignant tumor of infrahyoid epiglottis                             | Cancer |
| 4110565 | Malignant tumor of suprahyoid epiglottis                             | Cancer |
| 4110434 | Malignant tumor of inferior turbinate                                | Cancer |
| 4110432 | Carcinoma of submandibular gland                                     | Cancer |
| 4110425 | Carcinoma of uvula                                                   | Cancer |
| 4110422 | Carcinoma of lower gum                                               | Cancer |
| 4110420 | Malignant tumor of anterior two-thirds of tongue - lateral margin    | Cancer |
| 4110417 | Carcinoma of vermilion border of lower lip                           | Cancer |
| 4110167 | Intermediate grade B-cell lymphoma                                   | Cancer |
| 4110135 | Metastasis to eye of unknown primary                                 | Cancer |
| 4110018 | Metastasis to soft tissue of unknown primary                         | Cancer |
| 4110013 | Metastasis to colon of unknown primary                               | Cancer |
| 4102385 | Myxoid dermatofibrosarcoma protuberans                               | Cancer |
| 4100557 | Peripheral neuroectodermal tumor                                     | Cancer |
| 4097585 | Aleukemic myeloid leukemia                                           | Cancer |
| 4097572 | Follicular non-Hodgkin's mixed small cleaved and large cell lymphoma | Cancer |
| 4097570 | Malignant histiocytosis of lymph nodes of axilla and upper limb      | Cancer |
| 4096969 | Diffuse non-Hodgkin's lymphoma undifferentiated                      | Cancer |
| 4095897 | Compound leukemias                                                   | Cancer |
| 4095889 | Malignant neoplasm of corpus callosum                                | Cancer |
| 4095603 | Malignant neoplasm of skin of thumb                                  | Cancer |
| 4095587 | Malignant neoplasm of connective and soft tissue of axilla           | Cancer |
| 4095586 | Malignant neoplasm of connective and soft tissue of toe              | Cancer |
| 4095580 | Malignant neoplasm of coccygeal vertebra                             | Cancer |
| 4095578 | Malignant neoplasm of fourth metacarpal bone                         | Cancer |
| 4095446 | Malignant neoplasm of cricoid cartilage                              | Cancer |
| 4095299 | Malignant neoplasm of pons                                           | Cancer |
| 4095298 | Malignant neoplasm of globus pallidus                                | Cancer |
| 4095164 | Malignant tumor of ectopic testis                                    | Cancer |
| 4095158 | Malignant neoplasm of squamocolumnar junction of cervix              | Cancer |
| 4095152 | Malignant neoplasm of skin of great toe                              | Cancer |
| 4095011 | Malignant neoplasm of connective and soft tissue of thumb            | Cancer |
| 4095009 | Malignant neoplasm of connective and soft tissue of forearm          | Cancer |
| 4095004 | Malignant neoplasm of calcaneum                                      | Cancer |

## SUPPORTING INFORMATION Newby 2022 Metformin versus sulfonylureas on Dementia and Parkinson's risk

|         |                                                                                                 |        |
|---------|-------------------------------------------------------------------------------------------------|--------|
| 4095002 | Malignant neoplasm of phalanges of hand                                                         | Cancer |
| 4094874 | Malignant neoplasm of cartilage of trachea                                                      | Cancer |
| 4094868 | Malignant neoplasm of perinephric tissue                                                        | Cancer |
| 4094541 | Mast cell malignancy of lymph nodes of inguinal region and lower limb                           | Cancer |
| 4093650 | Malignant neoplasm of midline of tongue                                                         | Cancer |
| 4093647 | Malignant neoplasm of lower lip, buccal aspect                                                  | Cancer |
| 4093012 | Malignant neoplasm of upper lip, lipstick area                                                  | Cancer |
| 4092514 | Malignant neoplasm of endocervical gland                                                        | Cancer |
| 4092379 | Malignant neoplasm of skin of external auditory meatus                                          | Cancer |
| 4092376 | Malignant melanoma of popliteal fossa area                                                      | Cancer |
| 4092370 | Malignant melanoma of umbilicus                                                                 | Cancer |
| 4092361 | Malignant neoplasm of connective and soft tissue of sacrum or coccyx                            | Cancer |
| 4092360 | Malignant neoplasm of connective and soft tissue of inguinal region                             | Cancer |
| 4092357 | Malignant neoplasm of connective and soft tissue of popliteal space                             | Cancer |
| 4092237 | Malignant neoplasm of connective and soft tissue of hand                                        | Cancer |
| 4092236 | Malignant neoplasm of connective and soft tissue of shoulder                                    | Cancer |
| 4092213 | Malignant neoplasm of arytenoid cartilage                                                       | Cancer |
| 4092210 | Malignant tumor of nasal vestibule                                                              | Cancer |
| 4092080 | Malignant neoplasm of the pouch of Douglas                                                      | Cancer |
| 4092079 | Malignant neoplasm of mesocecum                                                                 | Cancer |
| 4091932 | Malignant neoplasm of epiglottis, free border                                                   | Cancer |
| 4091916 | Malignant lymphoma - small cleaved cell                                                         | Cancer |
| 4091762 | Secondary malignant neoplasm of skin of head                                                    | Cancer |
| 4091616 | Malignant neoplasm of cerebral dura mater                                                       | Cancer |
| 4091614 | Malignant neoplasm of medulla oblongata                                                         | Cancer |
| 4091610 | Malignant neoplasm of thalamus                                                                  | Cancer |
| 4091493 | Malignant tumor of hypothalamus                                                                 | Cancer |
| 4089778 | Malignant neoplasm of connective and soft tissue of hip                                         | Cancer |
| 4089776 | Malignant neoplasm of connective and soft tissue, upper arm                                     | Cancer |
| 4089775 | Malignant neoplasm soft tissues of cervical spine                                               | Cancer |
| 4089766 | Malignant neoplasm of carpal bone - trapezium                                                   | Cancer |
| 4089761 | Malignant neoplasm of malar bone                                                                | Cancer |
| 4089666 | Malignant neoplasm of retrocecal tissue                                                         | Cancer |
| 4089662 | Malignant neoplasm of interlobular bile ducts                                                   | Cancer |
| 4089646 | Malignant neoplasm of junctional region of epiglottis                                           | Cancer |
| 4089644 | Malignant neoplasm of junction of hard and soft palate                                          | Cancer |
| 4085561 | Paraspinal neuroblastoma                                                                        | Cancer |
| 4085560 | Thoracic neuroblastoma                                                                          | Cancer |
| 4085559 | Adrenal neuroblastoma                                                                           | Cancer |
| 4085076 | Tibial adamantinoma                                                                             | Cancer |
| 4084437 | Abdominothoracic neuroblastoma                                                                  | Cancer |
| 4083496 | Neuroblastoma of brain                                                                          | Cancer |
| 4082834 | Malignant teratoma of mediastinum                                                               | Cancer |
| 4082338 | Chronic lymphocytic polymorphocytic leukemia syndrome                                           | Cancer |
| 4082332 | Malignant melanoma of meninges                                                                  | Cancer |
| 4081041 | Malignant tumor of fibrous tissue                                                               | Cancer |
| 4080733 | Rhabdomyosarcoma of bladder                                                                     | Cancer |
| 4079696 | High grade T-cell lymphoma                                                                      | Cancer |
| 4079693 | Monocytoid B-cell lymphoma                                                                      | Cancer |
| 4079689 | Hodgkin's disease, nodular sclerosis - lymphocytic predominance                                 | Cancer |
| 4079684 | Non-secretory myeloma                                                                           | Cancer |
| 4079274 | Malignant white blood cell disorder                                                             | Cancer |
| 4033890 | Primary malignant neoplasm of independent multiple sites                                        | Cancer |
| 4030667 | Lymphoma of kidney                                                                              | Cancer |
| 4003682 | Overlapping malignant neoplasm of uterine cervix                                                | Cancer |
| 4003024 | Mesothelioma of omentum                                                                         | Cancer |
| 4001320 | Primary malignant neoplasm of peripheral nerves of hip                                          | Cancer |
| 765058  | Malignant carcinoid tumor of large intestine                                                    | Cancer |
| 442178  | Secondary malignant neoplasm of male breast                                                     | Cancer |
| 442126  | Primary malignant neoplasm of nipple of male breast                                             | Cancer |
| 440964  | Hodgkin's paragranuloma of extranodal AND/OR solid organ site                                   | Cancer |
| 440341  | Secondary malignant neoplasm of lymph nodes of face                                             | Cancer |
| 439287  | Hodgkin's disease, lymphocytic-histiocytic predominance of lymph nodes of axilla and upper limb | Cancer |
| 437817  | Hodgkin's sarcoma of extranodal AND/OR solid organ site                                         | Cancer |
| 437226  | Malignant neoplasm of nasopharyngeal wall                                                       | Cancer |
| 436929  | Malignant histiocytosis of extranodal AND/OR solid organ site                                   | Cancer |
| 436927  | Hodgkin's disease, lymphocytic-histiocytic predominance of lymph nodes of head, face and neck   | Cancer |
| 318382  | Malignant mast cell tumor of extranodal AND/OR solid organ site                                 | Cancer |

## SUPPORTING INFORMATION Newby 2022 Metformin versus sulfonylureas on Dementia and Parkinson's risk

|          |                                                                                       |        |
|----------|---------------------------------------------------------------------------------------|--------|
| 199744   | Carcinoma liver and/or biliary system                                                 | Cancer |
| 197231   | Hodgkin's disease, nodular sclerosis of lymph nodes of inguinal region and lower limb | Cancer |
| 195199   | Hodgkin's disease, mixed cellularity of lymph nodes of inguinal region and lower limb | Cancer |
| 30346    | Primary malignant neoplasm of neck                                                    | Cancer |
| 36712724 | Infiltrating lobular carcinoma of left female breast                                  | Cancer |
| 36712709 | Primary adenocarcinoma of lower lobe of right lung                                    | Cancer |
| 765123   | Primary malignant neoplasm of female right breast                                     | Cancer |
| 4110019  | Metastasis to breast of unknown primary                                               | Cancer |
| 36712762 | Recurrent malignant neoplasm of prostate                                              | Cancer |
| 36712933 | Primary malignant neoplasm of both ovaries                                            | Cancer |
| 36712744 | Primary squamous cell carcinoma of left ear                                           | Cancer |
| 36712707 | Primary adenocarcinoma of lower lobe of left lung                                     | Cancer |
| 36713671 | Small cell neuroendocrine carcinoma of bladder                                        | Cancer |
| 4312950  | Secondary malignant neoplasm of epitrochlear lymph nodes                              | Cancer |
| 4313217  | Secondary malignant neoplasm of trachea                                               | Cancer |
| 46272955 | Primary clear cell adenocarcinoma of lung                                             | Cancer |
| 46271211 | Secondary malignant neoplasm of lumbosacral plexus                                    | Cancer |
| 45773563 | Primary squamous cell carcinoma of ethmoidal sinus                                    | Cancer |
| 45773547 | Childhood myelodysplastic syndrome                                                    | Cancer |
| 45772941 | Primary basaloid squamous cell carcinoma of hypopharynx                               | Cancer |
| 45772938 | Primary papillary squamous cell carcinoma of lung                                     | Cancer |
| 45771026 | Primary salivary gland-type tumor of oropharynx                                       | Cancer |
| 45771025 | Primary cystadenocarcinoma of oropharynx                                              | Cancer |
| 45771018 | Primary adenosquamous cell carcinoma of larynx                                        | Cancer |
| 45771014 | Malignant melanoma of accessory sinus                                                 | Cancer |
| 45771012 | Primary adenocarcinoma of maxillary sinus                                             | Cancer |
| 45769825 | Recurrent primary malignant neoplasm of vulva                                         | Cancer |
| 45769408 | Malignant neoplasm after immunosuppressive therapy                                    | Cancer |
| 45769058 | Primary salivary gland type carcinoma of hypopharynx                                  | Cancer |
| 45769034 | Primary mucinous cystadenocarcinoma of lung                                           | Cancer |
| 45769031 | Primary mucoepidermoid carcinoma of oropharynx                                        | Cancer |
| 45769029 | Primary epithelial-myoepithelial carcinoma of oropharynx                              | Cancer |
| 45769028 | Primary carcinoma ex pleomorphic adenoma of oropharynx                                | Cancer |
| 45769027 | Primary myoepithelial carcinoma of oropharynx                                         | Cancer |
| 45769024 | Primary adenosquamous carcinoma of oropharynx                                         | Cancer |
| 45769022 | Primary papillary squamous cell carcinoma of oropharynx                               | Cancer |
| 45769021 | Primary basaloid carcinoma of oropharynx                                              | Cancer |
| 45769018 | Primary squamous cell carcinoma of subglottis                                         | Cancer |
| 45768985 | Primary adenoid cystic carcinoma of hypopharynx                                       | Cancer |
| 45768982 | Primary squamous cell carcinoma of lateral wall of oropharynx                         | Cancer |
| 45768980 | Primary squamous cell carcinoma of posterior wall of oropharynx                       | Cancer |
| 45768979 | Primary squamous cell carcinoma of branchial cleft                                    | Cancer |
| 45768978 | Overlapping squamous cell carcinoma of oropharynx                                     | Cancer |
| 45768953 | Primary squamous cell adenoid carcinoma of trachea                                    | Cancer |
| 45768949 | Primary verrucous carcinoma of hypopharynx                                            | Cancer |
| 45768945 | Primary adenosquamous carcinoma of hypopharynx                                        | Cancer |
| 45768942 | Primary papillary squamous cell carcinoma of hypopharynx                              | Cancer |
| 45768940 | Primary adenocarcinoma of subglottis                                                  | Cancer |
| 45768936 | Primary adenocarcinoma of trachea                                                     | Cancer |
| 45768932 | Primary mucinous bronchiolo-alveolar carcinoma of lung                                | Cancer |
| 45768928 | Primary adenoid cystic carcinoma of lung                                              | Cancer |
| 45768922 | Primary pleomorphic carcinoma of lung                                                 | Cancer |
| 45768919 | Primary basaloid squamous cell carcinoma of lung                                      | Cancer |
| 45768918 | Primary clear cell squamous cell carcinoma of lung                                    | Cancer |
| 45768897 | Primary papillary squamous cell carcinoma of larynx                                   | Cancer |
| 45768886 | Primary papillary adenocarcinoma of lung                                              | Cancer |
| 45768885 | Primary solid carcinoma of lung                                                       | Cancer |
| 45768884 | Primary acinar cell carcinoma of lung                                                 | Cancer |
| 45768883 | Primary small cell non-keratinizing squamous cell carcinoma of lung                   | Cancer |
| 45768882 | Primary mucoepidermoid carcinoma of hypopharynx                                       | Cancer |
| 45768879 | Primary fetal adenocarcinoma of lung                                                  | Cancer |
| 45768878 | Primary adenocarcinoma of oropharynx                                                  | Cancer |
| 45768874 | Primary polymorphous low grade adenocarcinoma of oropharynx                           | Cancer |
| 45768870 | Primary spindle cell carcinoma of trachea                                             | Cancer |
| 45768865 | Primary squamous cell carcinoma of trachea                                            | Cancer |
| 45768842 | Malignant melanoma of sphenoidal sinus                                                | Cancer |
| 45768841 | Malignant melanoma of frontal sinus                                                   | Cancer |
| 45768838 | Primary squamous cell carcinoma of frontal sinus                                      | Cancer |
| 45768837 | Primary squamous cell carcinoma of sphenoidal sinus                                   | Cancer |
| 45768833 | Primary carcinoma of frontal sinus                                                    | Cancer |

## SUPPORTING INFORMATION Newby 2022 Metformin versus sulfonylureas on Dementia and Parkinson's risk

|          |                                                                                                    |        |
|----------|----------------------------------------------------------------------------------------------------|--------|
| 45768829 | Primary adenocarcinoma of frontal sinus                                                            | Cancer |
| 45768828 | Primary adenocarcinoma of ethmoidal sinus                                                          | Cancer |
| 45768824 | Primary adenocarcinoma of accessory sinus                                                          | Cancer |
| 45766461 | Kaposi's sarcoma not associated with acquired immunodeficiency syndrome                            | Cancer |
| 45765919 | Follicular non-Hodgkin's lymphoma diffuse follicle center cell sub-type grade 2                    | Cancer |
| 44814156 | Follicular lymphoma grade 2                                                                        | Cancer |
| 44814026 | Clinical stage C chronic lymphocytic leukaemia                                                     | Cancer |
| 44811228 | Clinical stage B chronic lymphocytic leukaemia                                                     | Cancer |
| 44811227 | Clinical stage A chronic lymphocytic leukaemia                                                     | Cancer |
| 44808118 | Follicular lymphoma grade 3b                                                                       | Cancer |
| 44808117 | Follicular lymphoma grade 3a                                                                       | Cancer |
| 44808028 | Follicular lymphoma grade 3                                                                        | Cancer |
| 44792338 | Siewert type I adenocarcinoma                                                                      | Cancer |
| 44792337 | Siewert type III adenocarcinoma                                                                    | Cancer |
| 44792336 | Siewert type II adenocarcinoma                                                                     | Cancer |
| 44784247 | Malignant melanoma of maxillary sinus                                                              | Cancer |
| 44783851 | Undifferentiated nonkeratinizing carcinoma of nasopharynx                                          | Cancer |
| 44783808 | Undifferentiated carcinoma of nasal sinus                                                          | Cancer |
| 44783592 | Classic medulloblastoma                                                                            | Cancer |
| 44783287 | High grade endometrial stromal sarcoma                                                             | Cancer |
| 44783280 | Sarcoma of orbit                                                                                   | Cancer |
| 44783253 | Paratesticular malignant neoplasm                                                                  | Cancer |
| 44782582 | Keratinizing squamous cell carcinoma of nasopharynx                                                | Cancer |
| 44782471 | Supratentorial primitive neuroectodermal tumor                                                     | Cancer |
| 42709758 | Secondary malignant neoplasm of skin of lower leg                                                  | Cancer |
| 42538850 | Classical Hodgkin lymphoma                                                                         | Cancer |
| 42538692 | Astroblastoma of brain                                                                             | Cancer |
| 42538579 | Therapy related acute myeloid leukemia due to and following administration of antineoplastic agent | Cancer |
| 42537755 | Primary malignant neuroendocrine neoplasm of ileum                                                 | Cancer |
| 42537753 | Primary squamous cell carcinoma of submandibular gland                                             | Cancer |
| 42537577 | Microsatellite instability-high colorectal cancer                                                  | Cancer |
| 42536743 | Primary malignant neuroendocrine neoplasm of pancreas                                              | Cancer |
| 42535535 | Malignant melanoma of skin of right lower limb                                                     | Cancer |
| 42534922 | Transitional cell carcinoma of left ureter                                                         | Cancer |
| 40493517 | Diffuse non-Hodgkin's lymphoma of intestine                                                        | Cancer |
| 40493435 | Sarcoma of sternum                                                                                 | Cancer |
| 40493019 | Diffuse non-Hodgkin's lymphoma of nose                                                             | Cancer |
| 40493017 | Follicular non-Hodgkin's lymphoma of oral cavity                                                   | Cancer |
| 40493012 | Follicular non-Hodgkin's lymphoma of uterine cervix                                                | Cancer |
| 40493011 | Follicular non-Hodgkin's lymphoma of tonsil                                                        | Cancer |
| 40493007 | Carcinoma of fundus of uterus                                                                      | Cancer |
| 40492985 | Malignant neoplasm of anterior and lateral floor of mouth                                          | Cancer |
| 40492940 | Follicular non-Hodgkin's lymphoma of central nervous system                                        | Cancer |
| 40492939 | Carcinoma of upper rectum                                                                          | Cancer |
| 40492416 | Primary malignant neoplasm of distal bile duct                                                     | Cancer |
| 40492016 | Carcinoma of pineal gland                                                                          | Cancer |
| 40491514 | Sarcoma of vertebra                                                                                | Cancer |
| 40491512 | Non-Hodgkin's lymphoma of uterine cervix                                                           | Cancer |
| 40490465 | Diffuse non-Hodgkin's lymphoma of extranodal site                                                  | Cancer |
| 40490459 | Liposarcoma of connective tissue                                                                   | Cancer |
| 40489963 | Diffuse non-Hodgkin's lymphoma of oral cavity                                                      | Cancer |
| 40489960 | Diffuse non-Hodgkin's lymphoma of testis                                                           | Cancer |
| 40489943 | Sarcoma of omentum                                                                                 | Cancer |
| 40489501 | Choriocarcinoma of placenta                                                                        | Cancer |
| 40489483 | Non-Hodgkin's lymphoma of oral cavity                                                              | Cancer |
| 40489481 | Non-Hodgkin's lymphoma of nose                                                                     | Cancer |
| 40489472 | Non-Hodgkin's lymphoma of ovary                                                                    | Cancer |
| 40488993 | Malignant melanoma of skin of vulva                                                                | Cancer |
| 40488991 | Malignant neoplasm of mastoid                                                                      | Cancer |
| 40488988 | Dermatofibrosarcoma protuberans of skin of chest                                                   | Cancer |
| 40488963 | Malignant melanoma of skin of scrotum                                                              | Cancer |
| 40488958 | Lymphoma of lesser curvature of stomach                                                            | Cancer |
| 40488947 | Sarcoma of posterior mediastinum                                                                   | Cancer |
| 40488946 | Sarcoma of mesentery                                                                               | Cancer |
| 40488935 | Malignant neoplasm of axial suprasellar region of brain                                            | Cancer |
| 40488914 | Leiomyosarcoma of lower esophagus                                                                  | Cancer |
| 40488901 | Follicular non-Hodgkin's lymphoma of prostate                                                      | Cancer |
| 40488448 | Marjolin's ulcer                                                                                   | Cancer |
| 40488419 | Fibrosarcoma of connective tissue                                                                  | Cancer |



## SUPPORTING INFORMATION Newby 2022 Metformin versus sulfonylureas on Dementia and Parkinson's risk

|          |                                                                                      |        |
|----------|--------------------------------------------------------------------------------------|--------|
| 40487139 | Carcinoma of skin of anus                                                            | Cancer |
| 40486666 | Non-Hodgkin's lymphoma of prostate                                                   | Cancer |
| 40486654 | Follicular non-Hodgkin's lymphoma of ovary                                           | Cancer |
| 40486639 | Sarcoma of scapula                                                                   | Cancer |
| 40486638 | Sarcoma of connective tissue                                                         | Cancer |
| 40486589 | Lymphoma of greater curvature of stomach                                             | Cancer |
| 40486565 | Sarcoma of axillary tail of female breast                                            | Cancer |
| 40486545 | Lymphoma of pyloric antrum of stomach                                                | Cancer |
| 40486222 | Sarcoma of mandible                                                                  | Cancer |
| 40486173 | Follicular non-Hodgkin's lymphoma of stomach                                         | Cancer |
| 40486169 | Follicular non-Hodgkin's lymphoma of nasopharynx                                     | Cancer |
| 40486166 | Diffuse non-Hodgkin's lymphoma of soft tissue                                        | Cancer |
| 40486157 | Sarcoma of coccyx                                                                    | Cancer |
| 40486084 | Leiomyosarcoma of cardia of stomach                                                  | Cancer |
| 40486082 | Malignant germ cell neoplasm of posterior mediastinum                                | Cancer |
| 40486029 | Lymphoma of fundus of stomach                                                        | Cancer |
| 40391740 | Pulmonary blastoma                                                                   | Cancer |
| 37399544 | Primary hepatic neuroendocrine carcinoma                                             | Cancer |
| 37399015 | Epstein-Barr virus positive diffuse large B-cell lymphoma of elderly                 | Cancer |
| 37397538 | Primary pulmonary lymphoma                                                           | Cancer |
| 37396884 | Hereditary diffuse carcinoma of stomach                                              | Cancer |
| 37396882 | Theca steroid producing cell malignant neoplasm of ovary                             | Cancer |
| 37396743 | Familial papillary thyroid carcinoma with renal papillary neoplasia syndrome         | Cancer |
| 37396187 | Pineal parenchymal tumor of intermediate differentiation                             | Cancer |
| 37396184 | Ependyoblastoma                                                                      | Cancer |
| 37395835 | Familial prostate cancer                                                             | Cancer |
| 37395650 | Primary small cell malignant neoplasm of lung, TNM stage 3                           | Cancer |
| 37395649 | Primary small cell malignant neoplasm of lung, TNM stage 2                           | Cancer |
| 37395579 | Paget disease of anal canal                                                          | Cancer |
| 37395573 | Primary malignant germ cell neoplasm                                                 | Cancer |
| 37119229 | Primary chondrosarcoma of bone of rib                                                | Cancer |
| 37117762 | Primary squamous cell carcinoma of pharynx                                           | Cancer |
| 37117201 | Primary adenocarcinoma of ileum                                                      | Cancer |
| 37116982 | Diffuse large B-cell lymphoma of central nervous system                              | Cancer |
| 37116954 | Clear cell papillary renal cell carcinoma                                            | Cancer |
| 37116745 | Primary cutaneous gamma-delta-positive T-cell lymphoma                               | Cancer |
| 37116598 | Primary mucinous adenocarcinoma of ovary                                             | Cancer |
| 37116593 | Primary mucinous carcinoma of digestive organ                                        | Cancer |
| 37116584 | Primary squamous cell carcinoma of lip                                               | Cancer |
| 37116583 | Primary squamous cell carcinoma of oral cavity                                       | Cancer |
| 37116428 | Primary urothelial carcinoma of paraurethral gland                                   | Cancer |
| 37115735 | Endometrial carcinosarcoma                                                           | Cancer |
| 37111319 | Familial malignant melanoma of skin                                                  | Cancer |
| 37110902 | Chronic lymphocytic leukemia genetic mutation variant                                | Cancer |
| 37110402 | Plasmablastic lymphoma                                                               | Cancer |
| 37110400 | T-cell histiocyte rich large B-cell lymphoma                                         | Cancer |
| 37110332 | Primary poorly differentiated carcinoma of thyroid gland                             | Cancer |
| 37110270 | Primary urothelial carcinoma of overlapping lesion of urinary organ                  | Cancer |
| 37109936 | B lymphoblastic leukemia lymphoma with t(9:22) (q34;q11.2); BCR-ABL 1                | Cancer |
| 37109303 | Primary malignant neoplasm of right kidney                                           | Cancer |
| 37109302 | Primary malignant neoplasm of left kidney                                            | Cancer |
| 37018972 | Primary adenocarcinoma of fallopian tube                                             | Cancer |
| 37018963 | Primary adenocarcinoma of skin                                                       | Cancer |
| 37018880 | Primary squamous cell carcinoma of vermilion border of lip                           | Cancer |
| 37018865 | Overlapping primary malignant neoplasm of bone and articular cartilage of lower limb | Cancer |
| 37018665 | Primary adenocarcinoma of intestinal tract                                           | Cancer |
| 37018661 | Malignant neoplasm of rectosigmoid junction metastatic to brain                      | Cancer |
| 37018648 | Primary adenocarcinoma of vulva                                                      | Cancer |
| 37018645 | Ewing sarcoma of bone structure of upper limb                                        | Cancer |
| 37018644 | Primary chondrosarcoma of bone of upper limb                                         | Cancer |
| 37018640 | Malignant glioma of cerebellum                                                       | Cancer |
| 37018567 | Kaposi sarcoma of viscus                                                             | Cancer |
| 37017893 | Philadelphia chromosome-negative precursor B-cell acute lymphoblastic leukemia       | Cancer |
| 37017087 | Malignant ameloblastoma of mandible                                                  | Cancer |
| 37016244 | Malignant pheochromocytoma                                                           | Cancer |
| 37016240 | Primary adenocarcinoma of small intestine                                            | Cancer |
| 37016238 | Primary adenocarcinoma of cervix uteri                                               | Cancer |
| 37016237 | Primary adenocarcinoma of anus                                                       | Cancer |

## SUPPORTING INFORMATION Newby 2022 Metformin versus sulfonylureas on Dementia and Parkinson's risk

|          |                                                                                                                      |        |
|----------|----------------------------------------------------------------------------------------------------------------------|--------|
| 37016197 | Glioblastoma multiforme of central nervous system                                                                    | Cancer |
| 37016196 | Primary malignant astrocytoma of central nervous system                                                              | Cancer |
| 37016150 | Non-Hodgkin lymphoma of central nervous system metastatic to lymph node of lower limb                                | Cancer |
| 37016120 | Primary transitional cell carcinoma of urethra                                                                       | Cancer |
| 37016119 | Primary squamous cell carcinoma of urethra                                                                           | Cancer |
| 36717587 | Primary solid papillary carcinoma with invasion of breast                                                            | Cancer |
| 36717578 | Primary squamous cell carcinoma of middle ear                                                                        | Cancer |
| 36717566 | Primary leiomyosarcoma of retroperitoneum                                                                            | Cancer |
| 36717542 | Primary sarcoma of retroperitoneum                                                                                   | Cancer |
| 36717461 | Therapy related acute myeloid leukemia and myelodysplastic syndrome                                                  | Cancer |
| 36717298 | Secondary malignant neoplasm of lymph nodes of neck from thyroid                                                     | Cancer |
| 36717260 | Infiltrating ductal carcinoma of central portion of left female breast                                               | Cancer |
| 36717228 | Primary low grade serous adenocarcinoma of ovary                                                                     | Cancer |
| 36717225 | Primary thymic carcinoma                                                                                             | Cancer |
| 36717181 | Primary neuroendocrine carcinoma of colon                                                                            | Cancer |
| 36717175 | Primary angiosarcoma of breast                                                                                       | Cancer |
| 36717173 | Primary adenocarcinoma of common bile duct                                                                           | Cancer |
| 36717161 | Aggressive natural killer-cell leukemia                                                                              | Cancer |
| 36716975 | Primary malignant melanoma of anus                                                                                   | Cancer |
| 36716937 | Carcinosarcoma of uterine adnexa                                                                                     | Cancer |
| 36716856 | Primary myosarcoma of uterus                                                                                         | Cancer |
| 36716774 | B-cell lymphoma unclassifiable with features intermediate between Burkitt lymphoma and diffuse large B-cell lymphoma | Cancer |
| 36716631 | Occupational cancer of skin                                                                                          | Cancer |
| 36716615 | Primary mixed adenocarcinoma of endometrium                                                                          | Cancer |
| 36716613 | Primary squamous cell carcinoma of vagina                                                                            | Cancer |
| 36716609 | Metastatic malignant neoplasm of meninges                                                                            | Cancer |
| 36716505 | Primary malignant neoplasm of esophagogastric junction                                                               | Cancer |
| 36716500 | Primary malignant neuroendocrine neoplasm of lung                                                                    | Cancer |
| 36716497 | Primary invasive pleomorphic lobular carcinoma of breast                                                             | Cancer |
| 36716493 | Primary malignant nerve sheath neoplasm of autonomic nerve                                                           | Cancer |
| 36716491 | Primary liposarcoma of peritoneum                                                                                    | Cancer |
| 36716490 | Primary liposarcoma of retroperitoneum                                                                               | Cancer |
| 36716186 | Hormone sensitive prostate cancer                                                                                    | Cancer |
| 36715921 | Primary cloacogenic carcinoma of anal canal                                                                          | Cancer |
| 36715913 | Primary malignant neuroendocrine neoplasm of colon                                                                   | Cancer |
| 36715888 | Primary malignant neuroendocrine neoplasm of small intestine                                                         | Cancer |
| 36715866 | Primary neuroendocrine carcinoma of duodenum                                                                         | Cancer |
| 36715861 | Primary neuroendocrine carcinoma of stomach                                                                          | Cancer |
| 36715857 | Primary malignant neuroendocrine neoplasm of stomach                                                                 | Cancer |
| 36715856 | Primary adenocarcinoma of overlapping lesion of stomach                                                              | Cancer |
| 36715854 | Linitis plastica of stomach                                                                                          | Cancer |
| 36715851 | Primary neuroendocrine carcinoma of esophagus                                                                        | Cancer |
| 36715850 | Primary adenocarcinoma of overlapping lesion of esophagus                                                            | Cancer |
| 36715849 | Primary adenocarcinoma of middle third of esophagus                                                                  | Cancer |
| 36715847 | Primary squamous cell carcinoma of overlapping lesion of esophagus                                                   | Cancer |
| 36715845 | Primary squamous cell carcinoma of upper third of esophagus                                                          | Cancer |
| 36715834 | Primary squamous cell carcinoma of overlapping lesion of male genital organ                                          | Cancer |
| 36715811 | Primary synovial sarcoma of soft tissue of limb                                                                      | Cancer |
| 36715810 | Primary liposarcoma of male genital organ                                                                            | Cancer |
| 36715808 | Primary angiosarcoma of heart                                                                                        | Cancer |
| 36715800 | Primary adenocarcinoma overlapping lesion of retroperitoneum peritoneum and omentum                                  | Cancer |
| 36715799 | Primary adenocarcinoma of nasal cavity                                                                               | Cancer |
| 36715796 | Primary adenocarcinoma of palate                                                                                     | Cancer |
| 36715795 | Follicular lymphoma of small intestine                                                                               | Cancer |
| 36715783 | Primary malignant sarcoma of skin                                                                                    | Cancer |
| 36715782 | Primary adnexal carcinoma of skin                                                                                    | Cancer |
| 36715591 | Indeterminate dendritic cell neoplasm                                                                                | Cancer |
| 36715590 | Systemic Epstein-Barr virus positive T-cell lymphoproliferative disease of childhood                                 | Cancer |
| 36715584 | Refractory anemia with ringed sideroblasts associated with marked thrombocytosis                                     | Cancer |
| 36713420 | Familial renal cell carcinoma                                                                                        | Cancer |
| 36713419 | Renal cell carcinoma of kidney except renal pelvis                                                                   | Cancer |
| 36713418 | Papillary thyroid carcinoma with renal papillary neoplasia                                                           | Cancer |
| 36713362 | Primary adenocarcinoma of body of pancreas                                                                           | Cancer |
| 36713026 | Secondary malignant neoplasm of lymph node from neoplasm of female breast                                            | Cancer |

## SUPPORTING INFORMATION Newby 2022 Metformin versus sulfonylureas on Dementia and Parkinson's risk

|          |                                                                              |        |
|----------|------------------------------------------------------------------------------|--------|
| 36712980 | Secondary adenocarcinoma of bilateral lungs                                  | Cancer |
| 36712822 | Secondary malignant neoplasm of bilateral adrenal glands                     | Cancer |
| 36712749 | Transitional cell carcinoma of right ureter                                  | Cancer |
| 36712748 | Transitional cell carcinoma of right renal pelvis                            | Cancer |
| 36712747 | Transitional cell carcinoma of left renal pelvis                             | Cancer |
| 36712746 | Primary squamous cell carcinoma of right ear                                 | Cancer |
| 36712743 | Primary seminoma of right testis                                             | Cancer |
| 36712742 | Primary seminoma of left testis                                              | Cancer |
| 36712739 | Recurrent primary malignant neoplasm of right female breast                  | Cancer |
| 36712738 | Recurrent primary malignant neoplasm of left female breast                   | Cancer |
| 36712733 | Malignant melanoma of skin of left lower limb                                | Cancer |
| 36712732 | Malignant melanoma of right choroid                                          | Cancer |
| 36712731 | Malignant melanoma of left choroid                                           | Cancer |
| 36712723 | Infiltrating ductal carcinoma of upper outer quadrant of right female breast | Cancer |
| 36712722 | Infiltrating ductal carcinoma of upper inner quadrant of right female breast | Cancer |
| 36712721 | Infiltrating ductal carcinoma of central portion of right female breast      | Cancer |
| 36712720 | Infiltrating ductal carcinoma of upper outer quadrant of left female breast  | Cancer |
| 36712719 | Infiltrating ductal carcinoma of upper inner quadrant of left female breast  | Cancer |
| 36712712 | Primary basal cell carcinoma of left ear                                     | Cancer |
| 35623402 | Adenocarcinoma of gallbladder and extrahepatic biliary tract                 | Cancer |
| 35614931 | Pineoblastoma                                                                | Cancer |
| 4315814  | Secondary malignant neoplasm of uvula                                        | Cancer |
| 4315810  | Secondary malignant neoplasm of tibia                                        | Cancer |
| 4315807  | Secondary malignant neoplasm of thigh                                        | Cancer |
| 4315801  | Secondary malignant neoplasm of soft tissues of thorax                       | Cancer |
| 4315799  | Secondary malignant neoplasm of soft tissues of hip                          | Cancer |
| 4315680  | Secondary malignant neoplasm of skin of ear                                  | Cancer |
| 4315675  | Secondary malignant neoplasm of scalene lymph nodes                          | Cancer |
| 4315673  | Secondary malignant neoplasm of right middle lobe of lung                    | Cancer |
| 4315668  | Secondary malignant neoplasm of pyriform sinus                               | Cancer |
| 4315667  | Secondary malignant neoplasm of pubis                                        | Cancer |
| 4315661  | Secondary malignant neoplasm of perianal skin                                | Cancer |
| 4315553  | Secondary malignant neoplasm of paraganglion                                 | Cancer |
| 4315550  | Secondary malignant neoplasm of pancreatic duct                              | Cancer |
| 4315549  | Secondary malignant neoplasm of tonsil                                       | Cancer |
| 4315546  | Secondary malignant neoplasm of scaphoid bone                                | Cancer |
| 4315545  | Secondary malignant neoplasm of nasal concha                                 | Cancer |
| 4315544  | Secondary malignant neoplasm of myocardium                                   | Cancer |
| 4315537  | Secondary malignant neoplasm of mandible                                     | Cancer |
| 4314501  | Mixed cell type lymphosarcoma of lymph nodes of head, face, and neck         | Cancer |
| 4314499  | Secondary malignant neoplasm of visceral pleura                              | Cancer |
| 4314497  | Secondary malignant neoplasm of ventral surface of tongue                    | Cancer |
| 4314494  | Secondary malignant neoplasm of urinary bladder neck                         | Cancer |
| 4314491  | Secondary malignant neoplasm of trigone of urinary bladder                   | Cancer |
| 4314490  | Secondary malignant neoplasm of tonsillar pillar                             | Cancer |
| 4314486  | Secondary malignant neoplasm of temporal bone                                | Cancer |
| 4314484  | Secondary malignant neoplasm of submaxillary gland                           | Cancer |
| 4314480  | Secondary malignant neoplasm of soft tissues of upper limb                   | Cancer |
| 4314362  | Secondary malignant neoplasm of soft tissues of buttock                      | Cancer |
| 4314360  | Secondary malignant neoplasm of skin of upper limb                           | Cancer |
| 4314359  | Secondary malignant neoplasm of skin of umbilicus                            | Cancer |
| 4314358  | Secondary malignant neoplasm of skin of toe                                  | Cancer |
| 4314355  | Secondary malignant neoplasm of skin of shoulder                             | Cancer |
| 4314351  | Secondary malignant neoplasm of skin of groin                                | Cancer |
| 4314350  | Secondary malignant neoplasm of skin of ankle                                | Cancer |
| 4314346  | Secondary malignant neoplasm of sebaceous gland                              | Cancer |
| 4314336  | Secondary malignant neoplasm of posterior wall of urinary bladder            | Cancer |
| 4314314  | Malignant mixed tumor of salivary gland                                      | Cancer |
| 4314199  | Secondary malignant neoplasm of zygomatic bone                               | Cancer |
| 4314189  | Secondary malignant neoplasm of upper outer quadrant of female breast        | Cancer |
| 4314070  | Secondary malignant neoplasm of trochlear nerve                              | Cancer |
| 4314066  | Secondary malignant neoplasm of tonsillar fossa                              | Cancer |
| 4314049  | Secondary malignant neoplasm of sphenoid bone                                | Cancer |
| 4314046  | Secondary malignant neoplasm of soft tissues of neck                         | Cancer |
| 4313939  | Secondary malignant neoplasm of soft tissues of inguinal region              | Cancer |
| 4313935  | Secondary malignant neoplasm of skin of forearm                              | Cancer |

## SUPPORTING INFORMATION Newby 2022 Metformin versus sulfonylureas on Dementia and Parkinson's risk

|         |                                                                     |        |
|---------|---------------------------------------------------------------------|--------|
| 4313932 | Secondary malignant neoplasm of skin of chin                        | Cancer |
| 4313928 | Secondary malignant neoplasm of short bone of lower limb            | Cancer |
| 4313922 | Secondary malignant neoplasm of posterior mediastinum               | Cancer |
| 4313912 | Secondary malignant neoplasm of paravaginal lymph nodes             | Cancer |
| 4313911 | Secondary malignant neoplasm of parathyroid gland                   | Cancer |
| 4313803 | Secondary malignant neoplasm of parametrium                         | Cancer |
| 4313798 | Secondary malignant neoplasm of myometrium                          | Cancer |
| 4313797 | Secondary malignant neoplasm of muscle of thorax                    | Cancer |
| 4313794 | Secondary malignant neoplasm of muscle of buttock                   | Cancer |
| 4313229 | Mixed cell type lymphosarcoma of intrathoracic lymph nodes          | Cancer |
| 4313226 | Secondary malignant neoplasm of vulva                               | Cancer |
| 4313224 | Secondary malignant neoplasm of uveal tract                         | Cancer |
| 4313223 | Secondary malignant neoplasm of uterine adnexa                      | Cancer |
| 4313222 | Secondary malignant neoplasm of ureteric orifice of urinary bladder | Cancer |
| 4313221 | Secondary malignant neoplasm of urachus                             | Cancer |
| 4313218 | Secondary malignant neoplasm of trigeminal nerve                    | Cancer |
| 4313216 | Secondary malignant neoplasm of lower third of esophagus            | Cancer |
| 4313215 | Secondary malignant neoplasm of long bone of upper limb             | Cancer |
| 4313210 | Secondary malignant neoplasm of lateral wall of urinary bladder     | Cancer |
| 4313206 | Secondary malignant neoplasm of lacrimal gland                      | Cancer |
| 4313171 | Malignant melanoma of skin of canthus of eye                        | Cancer |
| 4313091 | Secondary malignant neoplasm of jaw                                 | Cancer |
| 4313089 | Secondary malignant neoplasm of inguinal region                     | Cancer |
| 4313085 | Secondary malignant neoplasm of hypoglossal nerve                   | Cancer |
| 4312957 | Secondary malignant neoplasm of fallopian tube                      | Cancer |
| 4312956 | Secondary malignant neoplasm of facial nerve                        | Cancer |
| 4312946 | Secondary malignant neoplasm of cranial nerve                       | Cancer |
| 4312939 | Secondary malignant neoplasm of cervical esophagus                  | Cancer |
| 4312938 | Secondary malignant neoplasm of central portion of female breast    | Cancer |
| 4312934 | Secondary malignant neoplasm of cardia of stomach                   | Cancer |
| 4312825 | Secondary malignant neoplasm of calcaneus                           | Cancer |
| 4312703 | Secondary malignant neoplasm of anus                                | Cancer |
| 4312702 | Secondary malignant neoplasm of anterior wall of nasopharynx        | Cancer |
| 4312700 | Secondary malignant neoplasm of anal canal                          | Cancer |
| 4312694 | Primary malignant neoplasm of thigh                                 | Cancer |
| 4312692 | Primary malignant neoplasm of supraclavicular region                | Cancer |
| 4312690 | Primary malignant neoplasm of soft tissues of perineum              | Cancer |
| 4312677 | Primary malignant neoplasm of sclera                                | Cancer |
| 4312676 | Primary malignant neoplasm of sacrum                                | Cancer |
| 4312566 | Primary malignant neoplasm of rectovesical septum                   | Cancer |
| 4312563 | Secondary malignant neoplasm of patella                             | Cancer |
| 4312555 | Secondary malignant neoplasm of muscle of upper limb                | Cancer |
| 4312554 | Secondary malignant neoplasm of muscle of shoulder                  | Cancer |
| 4312553 | Secondary malignant neoplasm of muscle of perineum                  | Cancer |
| 4312552 | Secondary malignant neoplasm of muscle of hip                       | Cancer |
| 4312423 | Secondary malignant neoplasm of flank                               | Cancer |
| 4312301 | Secondary malignant neoplasm of extrahepatic bile ducts             | Cancer |
| 4312300 | Secondary malignant neoplasm of ethmoid bone                        | Cancer |
| 4312286 | Secondary malignant neoplasm of cecum                               | Cancer |
| 4312278 | Secondary malignant neoplasm of bone of face                        | Cancer |
| 4312277 | Secondary malignant neoplasm of body of uterus                      | Cancer |
| 4312276 | Secondary malignant neoplasm of blood vessel                        | Cancer |
| 4312166 | Secondary malignant neoplasm of blood vessel of perineum            | Cancer |
| 4312149 | Secondary malignant neoplasm of anterior wall of urinary bladder    | Cancer |
| 4312039 | Secondary malignant neoplasm of acoustic nerve                      | Cancer |
| 4312033 | Primary malignant neoplasm of vomer                                 | Cancer |
| 4312032 | Primary malignant neoplasm of vestibule of nose                     | Cancer |
| 4312026 | Secondary malignant neoplasm of larynx                              | Cancer |
| 4312019 | Secondary malignant neoplasm of ilium                               | Cancer |
| 4312018 | Secondary malignant neoplasm of hepatic flexure of colon            | Cancer |
| 4312016 | Secondary malignant neoplasm of hamate bone                         | Cancer |
| 4312014 | Secondary malignant neoplasm of frontal lobe                        | Cancer |
| 4312012 | Secondary malignant neoplasm of prepuce                             | Cancer |
| 4311875 | Secondary malignant neoplasm of descending colon                    | Cancer |
| 4311760 | Secondary malignant neoplasm of body of stomach                     | Cancer |
| 4311758 | Secondary malignant neoplasm of blood vessel of thorax              | Cancer |
| 4311756 | Secondary malignant neoplasm of blood vessel of lower limb          | Cancer |
| 4311747 | Secondary malignant neoplasm of blood vessel of buttock             | Cancer |
| 4311719 | Primary Kaposi's sarcoma of oral cavity                             | Cancer |
| 4311633 | Secondary malignant neoplasm of adnexa of skin                      | Cancer |
| 4311625 | Primary malignant neoplasm of trigeminal nerve                      | Cancer |

## SUPPORTING INFORMATION Newby 2022 Metformin versus sulfonylureas on Dementia and Parkinson's risk

|         |                                                                              |        |
|---------|------------------------------------------------------------------------------|--------|
| 4311496 | Primary malignant neoplasm of pelvic peritoneum                              | Cancer |
| 4311491 | Primary malignant neoplasm of muscle of shoulder                             | Cancer |
| 4311490 | Primary malignant neoplasm of muscle of pelvis                               | Cancer |
| 4311488 | Primary malignant neoplasm of muscle of lower limb                           | Cancer |
| 4311486 | Primary malignant neoplasm of muscle of buttock                              | Cancer |
| 4311485 | Primary malignant neoplasm of muscle of abdomen                              | Cancer |
| 4311477 | Primary malignant neoplasm of great vessels                                  | Cancer |
| 4311476 | Primary malignant neoplasm of gingival mucosa                                | Cancer |
| 4311341 | Secondary malignant neoplasm of soft tissues of perineum                     | Cancer |
| 4311339 | Secondary malignant neoplasm of soft palate                                  | Cancer |
| 4311337 | Secondary malignant neoplasm of skin of scalp                                | Cancer |
| 4311333 | Secondary malignant neoplasm of skin of forehead                             | Cancer |
| 4311331 | Secondary malignant neoplasm of skin of cheek                                | Cancer |
| 4311327 | Secondary malignant neoplasm of sacrococcygeal region                        | Cancer |
| 4311324 | Secondary malignant neoplasm of retina                                       | Cancer |
| 4311283 | Malignant neoplasm of gum and contiguous sites                               | Cancer |
| 4311212 | Secondary malignant neoplasm of posterior wall of nasopharynx                | Cancer |
| 4310162 | Undifferentiated large cell carcinomatosis                                   | Cancer |
| 4310135 | Primary sarcoma of tongue                                                    | Cancer |
| 4307000 | Leukemic infiltration of orbit                                               | Cancer |
| 4301779 | Granulocytic sarcoma affecting skin                                          | Cancer |
| 4301665 | Leukemic infiltration of skin                                                | Cancer |
| 4301664 | Spongiotic mycosis fungoides                                                 | Cancer |
| 4301662 | Tumor stage mycosis fungoides                                                | Cancer |
| 4301644 | Epithelioid leiomyosarcoma of skin                                           | Cancer |
| 4300790 | Malignant histiocytosis involving skin                                       | Cancer |
| 4300701 | Precursor B-cell lymphoblastic lymphoma involving skin                       | Cancer |
| 4300690 | Malignant infiltration of skin by underlying tumor                           | Cancer |
| 4300681 | Cutaneous leiomyosarcoma with granular cell change                           | Cancer |
| 4300679 | Malignant Triton tumor                                                       | Cancer |
| 4300574 | Ceruminous gland adenocarcinoma                                              | Cancer |
| 4300572 | Small cell eccrine carcinoma                                                 | Cancer |
| 4300571 | Malignant chondroid syringoma                                                | Cancer |
| 4300566 | Balloon cell malignant melanoma                                              | Cancer |
| 4300559 | Signet ring squamous cell carcinoma                                          | Cancer |
| 4300558 | Acantholytic squamous cell carcinoma                                         | Cancer |
| 4299154 | Leukemic infiltration of skin in chronic myeloid leukemia                    | Cancer |
| 4299150 | Angiocentric NK/T-cell malignant lymphoma involving skin                     | Cancer |
| 4299148 | CD-30 negative T-immunoblastic cutaneous lymphoma                            | Cancer |
| 4299145 | CD-30 positive pleomorphic large T-cell cutaneous lymphoma                   | Cancer |
| 4299142 | Pagetoid reticulosis                                                         | Cancer |
| 4299140 | Granulomatous mycosis fungoides                                              | Cancer |
| 4299132 | Extrarenal rhabdoid tumor                                                    | Cancer |
| 4298848 | T-cell leukemic infiltration of skin                                         | Cancer |
| 4298847 | Malignant tumor of nerve sheath origin                                       | Cancer |
| 4298739 | Squamous cell carcinoma of nail apparatus                                    | Cancer |
| 4298238 | Adipocytic liposarcoma                                                       | Cancer |
| 4298153 | Epithelioid malignant nerve sheath tumor                                     | Cancer |
| 4298149 | Inflammatory malignant fibrous histiocytoma of skin                          | Cancer |
| 4298147 | Dermatofibrosarcoma protuberans with giant cell fibroblastoma                | Cancer |
| 4298129 | Moll's gland adenocarcinoma                                                  | Cancer |
| 4298127 | Clear cell eccrine hidradenocarcinoma                                        | Cancer |
| 4297801 | Materno-fetal metastatic malignant melanoma                                  | Cancer |
| 4297353 | Leukemic infiltration of skin                                                | Cancer |
| 4297352 | Localized pagetoid reticulosis                                               | Cancer |
| 4297351 | Erythrodermic mycosis fungoides                                              | Cancer |
| 4297349 | Metastasis involving oral cavity                                             | Cancer |
| 4297201 | Kaposi's sarcoma - sporadic                                                  | Cancer |
| 4297195 | Undifferentiated adnexal carcinoma of skin                                   | Cancer |
| 4297193 | Malignant eccrine spiradenoma                                                | Cancer |
| 4297192 | Malignant cylindroma                                                         | Cancer |
| 4295479 | Arsenic-induced skin malignancy                                              | Cancer |
| 4295476 | Radiation-induced skin malignancy                                            | Cancer |
| 4294431 | Malignant neoplasm of subcutaneous fibrous tissue                            | Cancer |
| 4293714 | Localized skin involvement by breast carcinoma                               | Cancer |
| 4291595 | Hodgkin's disease affecting skin                                             | Cancer |
| 4291285 | Malignant neoplasm of nail apparatus                                         | Cancer |
| 4291272 | Malignant melanoma                                                           | Cancer |
| 4289827 | Malignant tumor involving vagina by direct extension from uterine cervix     | Cancer |
| 4289683 | Malignant tumor involving left ovary by direct extension from uterine cervix | Cancer |

## SUPPORTING INFORMATION Newby 2022 Metformin versus sulfonylureas on Dementia and Parkinson's risk

|         |                                                                                             |        |
|---------|---------------------------------------------------------------------------------------------|--------|
| 4289680 | Secondary malignant neoplasm of right fallopian tube                                        | Cancer |
| 4289676 | Malignant tumor involving vagina by direct extension from endometrium                       | Cancer |
| 4289674 | Malignant tumor involving vagina by direct extension from uterus                            | Cancer |
| 4289673 | Malignant tumor involving uterine cervix by direct extension from fallopian tube            | Cancer |
| 4289524 | Malignant tumor involving uterine corpus by separate metastasis from uterine cervix         | Cancer |
| 4289522 | Malignant tumor involving right ovary by direct extension from vagina                       | Cancer |
| 4289521 | Malignant tumor involving left ovary by separate metastasis uterus                          | Cancer |
| 4289390 | Malignant tumor involving left fallopian tube by direct extension from uterus               | Cancer |
| 4289388 | Primary malignant neoplasm of left fallopian tube                                           | Cancer |
| 4289377 | Malignant tumor involving bladder by separate metastasis from endometrium                   | Cancer |
| 4289373 | Malignant tumor involving urethra by direct extension from bladder                          | Cancer |
| 4289252 | Malignant tumor involving ureter by separate metastasis from bladder                        | Cancer |
| 4289251 | Malignant tumor involving ureter by direct extension from bladder                           | Cancer |
| 4289247 | Malignant tumor involving rectum by direct extension from uterine cervix                    | Cancer |
| 4289246 | Malignant tumor involving rectum by direct extension from prostate                          | Cancer |
| 4289102 | Malignant tumor involving uterine corpus by direct extension from uterine cervix            | Cancer |
| 4289097 | Malignant tumor involving bladder by direct extension from uterine cervix                   | Cancer |
| 4289095 | Malignant tumor involving rectum by separate metastasis from vagina                         | Cancer |
| 4289093 | Malignant tumor involving rectum by separate metastasis from ovary                          | Cancer |
| 4289090 | Malignant tumor involving rectum by direct extension from ovary                             | Cancer |
| 4283886 | Malignant tumor involving vagina by separate metastasis from uterus                         | Cancer |
| 4283885 | Malignant tumor involving vagina by separate metastasis from uterine cervix                 | Cancer |
| 4283884 | Malignant tumor involving vagina by separate metastasis from endometrium                    | Cancer |
| 4283751 | Malignant tumor involving left fallopian tube by separate metastasis from ovary             | Cancer |
| 4283750 | Malignant tumor involving right ovary by direct extension from uterine cervix               | Cancer |
| 4283741 | Malignant tumor involving seminal vesicle by separate metastasis from prostate              | Cancer |
| 4283740 | Malignant tumor involving seminal vesicle by direct extension from prostate                 | Cancer |
| 4283615 | Malignant tumor involving bladder by separate metastasis from ovary                         | Cancer |
| 4283613 | Malignant tumor involving rectum by separate metastasis from uterus                         | Cancer |
| 4281166 | Malignant tumor involving vagina by separate metastasis from ovary                          | Cancer |
| 4281164 | Malignant tumor involving vagina by separate metastasis from bladder                        | Cancer |
| 4281162 | Malignant tumor involving uterine cervix by separate metastasis from vagina                 | Cancer |
| 4281161 | Malignant tumor involving right ovary by separate metastasis from left ovary                | Cancer |
| 4281032 | Malignant tumor involving right ovary by direct extension from endometrium                  | Cancer |
| 4281026 | Malignant tumor involving left fallopian tube by direct extension from right fallopian tube | Cancer |
| 4281019 | Primary malignant neoplasm of seminal vesicle                                               | Cancer |
| 4280901 | Malignant tumor involving bladder by direct extension from uterus                           | Cancer |
| 4280898 | Malignant tumor involving urethra by separate metastasis from bladder                       | Cancer |
| 4269784 | Stewart-Treves syndrome                                                                     | Cancer |
| 4264112 | Mast cell malignancy of lymph nodes                                                         | Cancer |
| 4258703 | Primary squamous cell carcinoma of naris                                                    | Cancer |
| 4248187 | Secondary malignant neoplasm of occipital lymph nodes                                       | Cancer |
| 4248082 | Secondary malignant neoplasm of muscle of neck                                              | Cancer |
| 4248077 | Secondary malignant neoplasm of middle third of esophagus                                   | Cancer |
| 4248073 | Secondary malignant neoplasm of main bronchus                                               | Cancer |
| 4248069 | Secondary malignant neoplasm of laryngeal commissure                                        | Cancer |
| 4248063 | Secondary malignant neoplasm of islets of Langerhans                                        | Cancer |
| 4248062 | Secondary malignant neoplasm of ischium                                                     | Cancer |
| 4247961 | Secondary malignant neoplasm of fundus of stomach                                           | Cancer |
| 4247960 | Secondary malignant neoplasm of fibula                                                      | Cancer |
| 4247949 | Secondary malignant neoplasm of endocervix                                                  | Cancer |
| 4247946 | Secondary malignant neoplasm of common bile duct                                            | Cancer |

## SUPPORTING INFORMATION Newby 2022 Metformin versus sulfonylureas on Dementia and Parkinson's risk

|         |                                                                               |        |
|---------|-------------------------------------------------------------------------------|--------|
| 4247851 | Primary malignant neoplasm of phalanx of foot                                 | Cancer |
| 4247849 | Primary malignant neoplasm of patella                                         | Cancer |
| 4247847 | Primary malignant neoplasm of olfactory nerve                                 | Cancer |
| 4247843 | Primary malignant neoplasm of nasal concha                                    | Cancer |
| 4247828 | Primary malignant neoplasm of foot                                            | Cancer |
| 4247825 | Primary malignant neoplasm of diaphragm                                       | Cancer |
| 4247821 | Primary malignant neoplasm of carina                                          | Cancer |
| 4247720 | Primary malignant neoplasm of blood vessel of abdomen                         | Cancer |
| 4247360 | Primary malignant neoplasm of the mesocolon                                   | Cancer |
| 4247357 | Primary malignant neoplasm of soft tissues of head                            | Cancer |
| 4247355 | Primary malignant neoplasm of skin of wrist                                   | Cancer |
| 4247354 | Primary malignant neoplasm of skin of temporal region                         | Cancer |
| 4247345 | Primary malignant neoplasm of skin of abdomen                                 | Cancer |
| 4247340 | Primary malignant neoplasm of presacral region                                | Cancer |
| 4247337 | Primary malignant neoplasm of muscle of thorax                                | Cancer |
| 4247332 | Primary malignant neoplasm of ischium                                         | Cancer |
| 4247241 | Primary malignant neoplasm of flank                                           | Cancer |
| 4247233 | Primary malignant neoplasm of blood vessel of upper limb                      | Cancer |
| 4247230 | Primary malignant neoplasm of blood vessel of shoulder                        | Cancer |
| 4246923 | Primary malignant neoplasm of facial nerve                                    | Cancer |
| 4246810 | Primary malignant neoplasm of ectopic male breast tissue                      | Cancer |
| 4246809 | Primary malignant neoplasm of coccygeal body                                  | Cancer |
| 4246795 | Primary malignant neoplasm of upper arm                                       | Cancer |
| 4246791 | Malignant melanoma of skin of popliteal area                                  | Cancer |
| 4246790 | Malignant melanoma of skin of hip                                             | Cancer |
| 4246455 | Secondary malignant neoplasm of carotid body                                  | Cancer |
| 4246454 | Secondary malignant neoplasm of bronchus of right middle lobe                 | Cancer |
| 4246452 | Secondary malignant neoplasm of bronchus of left lower lobe                   | Cancer |
| 4246368 | Secondary malignant neoplasm of body of pancreas                              | Cancer |
| 4246253 | Secondary malignant neoplasm of adrenal medulla                               | Cancer |
| 4246249 | Primary malignant neoplasm of zygomatic bone                                  | Cancer |
| 4246234 | Primary malignant neoplasm of skin of toe                                     | Cancer |
| 4246233 | Primary malignant neoplasm of skin of perineum                                | Cancer |
| 4246229 | Primary malignant neoplasm of skin of elbow                                   | Cancer |
| 4246146 | Primary malignant neoplasm of radius                                          | Cancer |
| 4246143 | Primary malignant neoplasm of perirenal tissue                                | Cancer |
| 4246142 | Primary malignant neoplasm of periadrenal tissue                              | Cancer |
| 4246139 | Primary malignant neoplasm of para-aortic body                                | Cancer |
| 4246135 | Primary malignant neoplasm of muscle of perineum                              | Cancer |
| 4246133 | Primary malignant neoplasm of muscle of hip                                   | Cancer |
| 4246037 | Primary malignant neoplasm of eustachian tube                                 | Cancer |
| 4246033 | Primary malignant neoplasm of coccyx                                          | Cancer |
| 4246030 | Primary malignant neoplasm of cervical vertebral column                       | Cancer |
| 4246028 | Primary malignant neoplasm of cartilage of nose                               | Cancer |
| 4246026 | Primary malignant neoplasm of bone of lower limb                              | Cancer |
| 4246025 | Primary malignant neoplasm of bone of face                                    | Cancer |
| 4246014 | Primary malignant neoplasm of acromion                                        | Cancer |
| 4245465 | Malignant melanoma of skin of ankle                                           | Cancer |
| 4237166 | Malignant neoplasm of metatarsal bone of foot                                 | Cancer |
| 4230544 | Krukenberg tumor                                                              | Cancer |
| 4222722 | Pericarditis secondary to tumor metastatic to pericardium                     | Cancer |
| 4221907 | Precursor T cell lymphoblastic leukemia/lymphoblastic lymphoma                | Cancer |
| 4218170 | Malignant medulloepithelioma of ciliary body                                  | Cancer |
| 4217083 | Malignant teratoma of undescended testis                                      | Cancer |
| 4215390 | Aggressive lymphadenopathic mastocytosis with eosinophilia                    | Cancer |
| 4214660 | Multiple solitary plasmacytomas                                               | Cancer |
| 4201623 | Metastasis from malignant tumor of buccal cavity                              | Cancer |
| 4201484 | Local recurrence of malignant tumor of cervix                                 | Cancer |
| 4201483 | Local recurrence of malignant tumor of kidney                                 | Cancer |
| 4200888 | Local recurrence of malignant tumor of liver                                  | Cancer |
| 4200887 | Local recurrence of malignant tumor of stomach                                | Cancer |
| 4197582 | Squamous cell carcinoma of bronchus in right middle lobe                      | Cancer |
| 4196267 | Metastasis from malignant tumor of tongue                                     | Cancer |
| 4196255 | Local recurrence of malignant tumor of gallbladder                            | Cancer |
| 4196112 | Retinal pigment epithelial adenocarcinoma                                     | Cancer |
| 4191491 | Diaphyseal medullary stenosis with bone malignancy                            | Cancer |
| 4189478 | Metastatic neuroblastoma of orbit proper                                      | Cancer |
| 4183912 | Malignant tumor involving an organ by direct extension from ovary             | Cancer |
| 4183911 | Malignant tumor involving an organ by direct extension from endometrium       | Cancer |
| 4183744 | Malignant tumor involving an organ by separate metastasis from fallopian tube | Cancer |

## SUPPORTING INFORMATION Newby 2022 Metformin versus sulfonylureas on Dementia and Parkinson's risk

|         |                                                                            |        |
|---------|----------------------------------------------------------------------------|--------|
| 4183631 | Malignant tumor involving an organ by direct extension from bladder        | Cancer |
| 4183630 | Malignant tumor involving vulva by separate metastasis from uterus         | Cancer |
| 4183629 | Malignant tumor involving vulva by separate metastasis from uterine cervix | Cancer |
| 4182916 | Malignant tumor involving an organ by direct extension from uterine cervix | Cancer |
| 4181331 | Carcinoma of body of pancreas                                              | Cancer |
| 4180909 | Malignant tumor of minor salivary gland                                    | Cancer |
| 4180798 | Malignant tumor of myocardium                                              | Cancer |
| 4180797 | Malignant tumor of endocardium                                             | Cancer |
| 4178978 | Malignant tumor of aryepiglottic fold - laryngeal aspect                   | Cancer |
| 4174769 | Primary cerebral lymphoma                                                  | Cancer |
| 4174136 | Malignant peritoneal local recurrence                                      | Cancer |
| 4173962 | Lymphoma with spill                                                        | Cancer |
| 4173957 | Splenic lymphoma with villous lymphocytes                                  | Cancer |
| 4168069 | Carcinoma of tongue base - dorsal surface                                  | Cancer |
| 4162862 | Primary malignant neoplasm of thoracic vertebral column                    | Cancer |
| 4162249 | Carcinoma of pelvic bones, sacrum and coccyx                               | Cancer |
| 4162121 | Malignant neoplasm of thoracic vertebral column                            | Cancer |
| 4162120 | Primary malignant neoplasm of the mesentery                                | Cancer |
| 4162117 | Primary malignant neoplasm of apex of urinary bladder                      | Cancer |
| 4155170 | Primary malignant neoplasm of laryngeal aspect of aryepiglottic fold       | Cancer |
| 4153657 | Vaccine-induced fibrosarcoma                                               | Cancer |
| 4153344 | Acute lymphoblastic leukemia, transitional pre-B-cell                      | Cancer |
| 4146629 | Hodgkin's disease, lymphocytic depletion, reticular type                   | Cancer |
| 4146628 | Hodgkin's disease, lymphocytic depletion, diffuse fibrosis                 | Cancer |
| 4146032 | Histiocytic medullary reticulosis                                          | Cancer |
| 4144199 | Diffuse malignant lymphoma - centroblastic-centrocytic                     | Cancer |
| 4143679 | Hodgkin's disease, lymphocytic depletion of lymph nodes of head            | Cancer |
| 4143382 | Subacute myeloid leukemia in remission                                     | Cancer |
| 4139554 | Atypical hairy cell leukemia                                               | Cancer |
| 4126118 | Leukemic infiltrate of kidney                                              | Cancer |
| 4121970 | Malignant lymphoma, follicular center cell, non-cleaved                    | Cancer |
| 4119131 | Nodular malignant lymphoma, lymphocytic - well differentiated              | Cancer |
| 4116577 | Metastasis to retroperitoneum of unknown primary                           | Cancer |
| 4116575 | Metastasis to pleura of unknown primary                                    | Cancer |
| 4116237 | Malignant tumor of nasal cavity and nasopharynx                            | Cancer |
| 4116218 | Carcinoma ex pleomorphic adenoma of lacrimal gland                         | Cancer |
| 4116082 | Carcinoma of cervix stage 0                                                | Cancer |
| 4116076 | Embryonal carcinoma of ovary                                               | Cancer |
| 4116063 | Proliferating angioendotheliomatosis                                       | Cancer |
| 4115298 | Malignant melanoma arising in congenital nevus                             | Cancer |
| 4115297 | Malignant skin tumor with apocrine differentiation                         | Cancer |
| 4115265 | Carcinoma of middle third of esophagus                                     | Cancer |
| 4114337 | Malignant neoplasm of carpal bones                                         | Cancer |
| 4114215 | Adenocarcinoma of non-pigmented epithelium of ciliary body                 | Cancer |
| 4114199 | Malignant tumor of optic nerve sheath                                      | Cancer |
| 4113636 | Carcinoma of skin of head/neck                                             | Cancer |
| 4112979 | Malignant hemangiopericytoma of orbit                                      | Cancer |
| 4112976 | Mucoepidermoid tumor of lacrimal gland                                     | Cancer |
| 4112975 | Adenocarcinoma of lacrimal gland                                           | Cancer |
| 4112968 | Malignant astrocytoma of optic nerve                                       | Cancer |
| 4112964 | Oligodendroglioma of spinal cord                                           | Cancer |
| 4112958 | Malignant tumor of urethral stump                                          | Cancer |
| 4112803 | Acute promyelocytic leukemia - hypogranular variant                        | Cancer |
| 4112779 | Metastasis to uterus of unknown primary                                    | Cancer |
| 4112775 | Metastasis to spleen of unknown primary                                    | Cancer |
| 4112773 | Metastasis to rectum of unknown primary                                    | Cancer |
| 4112772 | Metastasis to large intestine of unknown primary                           | Cancer |
| 4112771 | Metastasis to heart of unknown primary                                     | Cancer |
| 4112607 | Carcinoma of pylorus                                                       | Cancer |
| 4112605 | Carcinoma of upper third of esophagus                                      | Cancer |
| 4112585 | Carcinoma of sublingual gland                                              | Cancer |
| 4112490 | Metastasis to bladder of unknown primary                                   | Cancer |
| 4112489 | Metastasis to ovary of unknown primary                                     | Cancer |
| 4112483 | Metastasis to mediastinum of unknown primary                               | Cancer |
| 4112482 | Metastasis to bronchus of unknown primary                                  | Cancer |
| 4112451 | Carcinoma of vermilion border of upper lip                                 | Cancer |
| 4112310 | IgD myeloma                                                                | Cancer |
| 4112073 | Scirrhous carcinoma of breast                                              | Cancer |
| 4111807 | Epithelioid hemangioendothelioma of lung                                   | Cancer |
| 4111799 | Carcinoma of cervical part of esophagus                                    | Cancer |



## SUPPORTING INFORMATION Newby 2022 Metformin versus sulfonylureas on Dementia and Parkinson's risk

|         |                                                                            |        |
|---------|----------------------------------------------------------------------------|--------|
| 4111797 | Malignant tumor of parapharyngeal space                                    | Cancer |
| 4111654 | Carcinoma of anterior part of floor of mouth                               | Cancer |
| 4111653 | Carcinoma of upper gum                                                     | Cancer |
| 4111645 | Carcinoma of frenum of lip                                                 | Cancer |
| 4111033 | Malignant infiltration of peripheral nerve                                 | Cancer |
| 4111025 | Malignant neoplasm of metacarpal bones                                     | Cancer |
| 4111022 | Malignant tumor of lateral nasal wall                                      | Cancer |
| 4111021 | Overlapping malignant neoplasm of oral cavity and lips and salivary glands | Cancer |
| 4110881 | Papillary cystadenocarcinoma of kidney                                     | Cancer |
| 4110870 | Endodermal sinus tumor of ovary                                            | Cancer |
| 4110740 | Malignant hemangiopericytoma of skin                                       | Cancer |
| 4110731 | Cutaneous fibrosarcoma                                                     | Cancer |
| 4110727 | Malignant melanoma arising in intradermal nevus                            | Cancer |
| 4110723 | Mucinous eccrine carcinoma                                                 | Cancer |
| 4110590 | Giant cell carcinoma of lung                                               | Cancer |
| 4110571 | Carcinoma of fundus of stomach                                             | Cancer |
| 4110570 | Carcinoma of cardia                                                        | Cancer |
| 4110562 | Malignant tumor of posterior commissure                                    | Cancer |
| 4110559 | Malignant tumor of anterior commissure                                     | Cancer |
| 4110435 | Malignant tumor of posterior margin of nasal septum and choanae            | Cancer |
| 4110430 | Carcinoma of upper labial sulcus                                           | Cancer |
| 4110428 | Carcinoma of lower buccal sulcus                                           | Cancer |
| 4110424 | Carcinoma of lateral part of floor of mouth                                | Cancer |
| 4110134 | Metastasis to kidney of unknown primary                                    | Cancer |
| 4110133 | Metastasis to vagina of unknown primary                                    | Cancer |
| 4109233 | Metastasis to small intestine of unknown primary                           | Cancer |
| 4097707 | Subacute myelomonocytic leukemia                                           | Cancer |
| 4097573 | Malignant immunoproliferative small intestinal disease                     | Cancer |
| 4097426 | Secondary malignant neoplasm of skin of shoulder and arm                   | Cancer |
| 4096968 | Mast cell malignancy of lymph nodes of multiple sites                      | Cancer |
| 4096965 | Malignant histiocytosis of lymph nodes of inguinal region and lower limb   | Cancer |
| 4096952 | Secondary malignant neoplasm of epididymis and vas deferens                | Cancer |
| 4095764 | Malignant neoplasm of connective tissue of orbit                           | Cancer |
| 4095763 | Malignant neoplasm of sclera                                               | Cancer |
| 4095583 | Malignant neoplasm of first metatarsal bone                                | Cancer |
| 4095581 | Malignant neoplasm of medial cuneiform                                     | Cancer |
| 4095449 | Malignant neoplasm of mucosa of trachea                                    | Cancer |
| 4095443 | Malignant tumor of tympanic antrum                                         | Cancer |
| 4095441 | Fibrosarcoma of spleen                                                     | Cancer |
| 4095309 | Malignant neoplasm of glossoepiglottic fold                                | Cancer |
| 4095303 | Malignant neoplasm of olfactory bulb                                       | Cancer |
| 4095300 | Malignant neoplasm of tapetum                                              | Cancer |
| 4095295 | Malignant neoplasm of crystalline lens                                     | Cancer |
| 4095025 | Alpha heavy chain disease, respiratory form                                | Cancer |
| 4095013 | Malignant neoplasm of connective and soft tissue of lower leg              | Cancer |
| 4095007 | Malignant neoplasm of fifth metatarsal bone                                | Cancer |
| 4095006 | Malignant neoplasm of second metatarsal bone                               | Cancer |
| 4095005 | Malignant neoplasm of navicular                                            | Cancer |
| 4094997 | Malignant neoplasm of xiphoid process                                      | Cancer |
| 4094996 | Malignant neoplasm of costovertebral joint                                 | Cancer |
| 4094716 | Malignant tumor of upper buccal sulcus                                     | Cancer |
| 4094553 | Aleukemic monocytic leukemia                                               | Cancer |
| 4094549 | Aleukemic lymphoid leukemia                                                | Cancer |
| 4094406 | Secondary malignant neoplasm of skin of hip and leg                        | Cancer |
| 4094252 | Malignant neoplasm of uncus                                                | Cancer |
| 4094020 | Malignant tumor of lacrimal drainage structure                             | Cancer |
| 4093646 | Malignant tumor of frenum of upper lip                                     | Cancer |
| 4092529 | Malignant neoplasm of extraocular muscle of orbit                          | Cancer |
| 4092233 | Malignant neoplasm of phalanges of foot                                    | Cancer |
| 4092228 | Malignant neoplasm of first metacarpal bone                                | Cancer |
| 4092227 | Malignant neoplasm of carpal bone - capitate                               | Cancer |
| 4092226 | Malignant neoplasm of carpal bone - lunate                                 | Cancer |
| 4092209 | Malignant neoplasm of nasal conchae                                        | Cancer |
| 4092069 | Malignant neoplasm of sphincter of Oddi                                    | Cancer |
| 4092058 | Malignant tumor of opening of auditory tube                                | Cancer |
| 4091619 | Malignant neoplasm of spinal dura mater                                    | Cancer |
| 4090229 | Malignant tumor of lower labial sulcus                                     | Cancer |
| 4090227 | Malignant tumor of lower buccal sulcus                                     | Cancer |
| 4090217 | Malignant tumor of frenum of lower lip                                     | Cancer |
| 4089861 | Malignant melanoma of external auditory meatus                             | Cancer |

## SUPPORTING INFORMATION Newby 2022 Metformin versus sulfonylureas on Dementia and Parkinson's risk

|         |                                                                                                          |                        |
|---------|----------------------------------------------------------------------------------------------------------|------------------------|
| 4089774 | Malignant neoplasm of tarsus of eyelid                                                                   | Cancer                 |
| 4089771 | Malignant neoplasm of lateral cuneiform                                                                  | Cancer                 |
| 4089768 | Malignant neoplasm of third metacarpal bone                                                              | Cancer                 |
| 4089764 | Malignant neoplasm of carpal bone - scaphoid                                                             | Cancer                 |
| 4089762 | Malignant neoplasm of costal cartilage                                                                   | Cancer                 |
| 4089667 | Malignant neoplasm of mesorectum                                                                         | Cancer                 |
| 4084147 | Metastatic malignant neoplasm to nasopharynx                                                             | Cancer                 |
| 4083498 | Pelvic neuroblastoma                                                                                     | Cancer                 |
| 4082919 | Endometrioid carcinoma of prostate                                                                       | Cancer                 |
| 4082481 | Juvenile chronic myeloid leukemia                                                                        | Cancer                 |
| 4081542 | Malignant infiltration of soft tissue                                                                    | Cancer                 |
| 4079280 | Common acute lymphoblastic leukemia                                                                      | Cancer                 |
| 4055132 | Secondary malignant neoplasm of nasopharyngeal wall                                                      | Cancer                 |
| 4046873 | Odontogenic ghost cell carcinoma                                                                         | Cancer                 |
| 4003023 | Mesothelioma of mesentery                                                                                | Cancer                 |
| 4002345 | Primary malignant neoplasm of peripheral nerves of head                                                  | Cancer                 |
| 4001667 | Mesothelioma of parietal peritoneum                                                                      | Cancer                 |
| 4001321 | Primary malignant neoplasm of peripheral nerves of abdomen                                               | Cancer                 |
| 4001174 | Mesothelioma of pelvic peritoneum                                                                        | Cancer                 |
| 765387  | Malignant carcinoid tumor of pancreas                                                                    | Cancer                 |
| 765056  | Malignant carcinoid tumor of lung                                                                        | Cancer                 |
| 764981  | Primary malignant neoplasm of ileocecal valve                                                            | Cancer                 |
| 764225  | Recurrent malignant neoplastic disease                                                                   | Cancer                 |
| 762802  | Malignant mesothelioma of the tunica vaginalis                                                           | Cancer                 |
| 761917  | Malignant carcinoid tumor of ileum                                                                       | Cancer                 |
| 761916  | Malignant carcinoid tumor of appendix                                                                    | Cancer                 |
| 761082  | Liposarcoma of retroperitoneum                                                                           | Cancer                 |
| 761047  | Chordoma of thoracic spine                                                                               | Cancer                 |
| 761027  | Secondary neuroendocrine carcinoma of peritoneum                                                         | Cancer                 |
| 761021  | Merkel cell carcinoma of trunk                                                                           | Cancer                 |
| 761020  | Merkel cell carcinoma of scalp                                                                           | Cancer                 |
| 761019  | Merkel cell carcinoma of neck                                                                            | Cancer                 |
| 760999  | Primary malignant neuroendocrine neoplasm of large intestine                                             | Cancer                 |
| 760961  | Malignant carcinoid tumor of duodenum                                                                    | Cancer                 |
| 760960  | Malignant carcinoid tumor of jejunum                                                                     | Cancer                 |
| 760959  | Malignant carcinoid tumor of cecum                                                                       | Cancer                 |
| 760958  | Malignant carcinoid tumor of ascending colon                                                             | Cancer                 |
| 759982  | Secondary adenocarcinoma of kidney                                                                       | Cancer                 |
| 759938  | Malignant melanoma metastatic to kidney                                                                  | Cancer                 |
| 444442  | Burkitt's tumor of lymph nodes of inguinal region AND/OR lower limb                                      | Cancer                 |
| 442123  | Primary malignant neoplasm of soft tissues of hip                                                        | Cancer                 |
| 439685  | Malignant neoplasm, overlapping lesion of digestive system                                               | Cancer                 |
| 439290  | Hodgkin's granuloma of lymph nodes of axilla and upper limb                                              | Cancer                 |
| 439284  | Hodgkin's disease, lymphocytic depletion of lymph nodes of axilla and upper limb                         | Cancer                 |
| 439283  | Hodgkin's disease, lymphocytic depletion of lymph nodes of inguinal region and lower limb                | Cancer                 |
| 439280  | Hodgkin's disease, mixed cellularity of lymph nodes of axilla and upper limb                             | Cancer                 |
| 201804  | Hodgkin's disease, lymphocytic-histiocytic predominance of lymph nodes of inguinal region and lower limb | Cancer                 |
| 196921  | Hodgkin's sarcoma of lymph nodes of inguinal region and lower limb                                       | Cancer                 |
| 196058  | Mast cell malignancy of intra-abdominal lymph nodes                                                      | Cancer                 |
| 192269  | Secondary carcinoma of gastrointestinal tract                                                            | Cancer                 |
| 134294  | Malignant melanoma of skin of external auditory canal                                                    | Cancer                 |
| 132570  | Leukemic reticuloendotheliosis of lymph nodes of head, face and neck                                     | Cancer                 |
| 193493  | Benign hypertensive renal disease                                                                        | Chronic kidney disease |
| 312358  | Chronic glomerulonephritis                                                                               | Chronic kidney disease |
| 4243625 | Diffuse glomerulosclerosis of kidney due to diabetes mellitus                                            | Chronic kidney disease |
| 201313  | Hypertensive renal disease                                                                               | Chronic kidney disease |
| 192359  | Renal failure syndrome                                                                                   | Chronic kidney disease |
| 4183446 | Milk alkali syndrome                                                                                     | Chronic kidney disease |
| 4260398 | Minimal change disease                                                                                   | Chronic kidney disease |
| 4163982 | Subacute milk alkali syndrome                                                                            | Chronic kidney disease |
| 193782  | End-stage renal disease                                                                                  | Chronic kidney disease |
| 443919  | Hypertensive renal failure                                                                               | Chronic kidney disease |
| 443961  | Anemia of chronic renal failure                                                                          | Chronic kidney disease |
| 4178133 | SLE glomerulonephritis syndrome, WHO class V                                                             | Chronic kidney disease |
| 4239804 | Chronic milk alkali syndrome                                                                             | Chronic kidney disease |
| 4241966 | Mesangiocapillary glomerulonephritis, type II                                                            | Chronic kidney disease |
| 4270049 | Nodular type diabetic glomerulosclerosis                                                                 | Chronic kidney disease |

## SUPPORTING INFORMATION Newby 2022 Metformin versus sulfonylureas on Dementia and Parkinson's risk

|         |                                                                                             |                        |
|---------|---------------------------------------------------------------------------------------------|------------------------|
| 442766  | Malignant hypertensive renal disease                                                        | Chronic kidney disease |
| 442626  | Benign hypertensive heart AND renal disease                                                 | Chronic kidney disease |
| 442603  | Malignant hypertensive heart AND renal disease                                              | Chronic kidney disease |
| 4287695 | Primary IgA nephropathy                                                                     | Chronic kidney disease |
| 4294813 | Mesangiocapillary glomerulonephritis, type I                                                | Chronic kidney disease |
| 252365  | Membranous glomerulonephritis                                                               | Chronic kidney disease |
| 4302748 | Chronic hypertensive uremia                                                                 | Chronic kidney disease |
| 433257  | Mesangiocapillary glomerulonephritis                                                        | Chronic kidney disease |
| 4216685 | Malignant arteriolar nephrosclerosis                                                        | Chronic kidney disease |
| 195556  | Hypertensive heart AND renal disease                                                        | Chronic kidney disease |
| 198185  | Chronic renal failure                                                                       | Chronic kidney disease |
| 4033463 | Enamel-renal syndrome                                                                       | Chronic kidney disease |
| 192279  | Disorder of kidney due to diabetes mellitus                                                 | Chronic kidney disease |
| 439696  | Hypertensive heart and renal disease with (congestive) heart failure                        | Chronic kidney disease |
| 439695  | Hypertensive heart and renal disease with renal failure                                     | Chronic kidney disease |
| 439694  | Hypertensive heart and renal disease with both (congestive) heart failure and renal failure | Chronic kidney disease |
| 4027121 | Nephrotic syndrome due to diabetes mellitus                                                 | Chronic kidney disease |
| 4056462 | Chronic mesangial proliferative glomerulonephritis                                          | Chronic kidney disease |
| 442075  | Chronic glomerulonephritis associated with another disorder                                 | Chronic kidney disease |
| 4056463 | Chronic exudative glomerulonephritis                                                        | Chronic kidney disease |
| 4027124 | Chronic focal glomerulonephritis                                                            | Chronic kidney disease |
| 4027125 | Chronic diffuse glomerulonephritis                                                          | Chronic kidney disease |
| 442074  | Focal membranoproliferative glomerulonephritis                                              | Chronic kidney disease |
| 4056478 | Chronic nephritic syndrome                                                                  | Chronic kidney disease |
| 4054993 | Chronic nephritic syndrome, minor glomerular abnormality                                    | Chronic kidney disease |
| 4056479 | Chronic nephritic syndrome, focal and segmental glomerular lesions                          | Chronic kidney disease |
| 4059463 | Chronic nephritic syndrome, diffuse endocapillary proliferative glomerulonephritis          | Chronic kidney disease |
| 4059584 | Chronic nephritic syndrome, diffuse mesangiocapillary glomerulonephritis                    | Chronic kidney disease |
| 4055899 | Chronic nephritic syndrome, dense deposit disease                                           | Chronic kidney disease |
| 4056480 | Chronic nephritic syndrome, diffuse crescentic glomerulonephritis                           | Chronic kidney disease |
| 4121264 | Epstein syndrome                                                                            | Chronic kidney disease |
| 4125960 | Steroid-sensitive minimal change glomerulonephritis                                         | Chronic kidney disease |
| 4125961 | Steroid-resistant minimal change glomerulonephritis                                         | Chronic kidney disease |
| 4125962 | Steroid-dependent minimal change glomerulonephritis                                         | Chronic kidney disease |
| 4030513 | Focal segmental glomerulosclerosis                                                          | Chronic kidney disease |
| 4128059 | Classical focal segmental glomerulosclerosis                                                | Chronic kidney disease |
| 4126302 | Hyperfiltration focal segmental glomerulosclerosis                                          | Chronic kidney disease |
| 4128061 | IgA nephropathy                                                                             | Chronic kidney disease |
| 4128062 | Mesangiocapillary glomerulonephritis type III                                               | Chronic kidney disease |
| 4128063 | IgM nephropathy                                                                             | Chronic kidney disease |
| 4030514 | C1q nephropathy                                                                             | Chronic kidney disease |
| 4125966 | Membranous glomerulonephritis - stage I                                                     | Chronic kidney disease |
| 4126303 | Membranous glomerulonephritis - stage II                                                    | Chronic kidney disease |
| 4126304 | Membranous glomerulonephritis - stage III                                                   | Chronic kidney disease |
| 4030515 | Membranous glomerulonephritis - stage IV                                                    | Chronic kidney disease |
| 4030516 | Membranous glomerulonephritis stage V                                                       | Chronic kidney disease |
| 4128200 | End stage renal failure untreated by renal replacement therapy                              | Chronic kidney disease |
| 4030520 | End stage renal failure on dialysis                                                         | Chronic kidney disease |
| 4125970 | End stage renal failure with renal transplant                                               | Chronic kidney disease |
| 4128221 | Microalbuminuric diabetic nephropathy                                                       | Chronic kidney disease |
| 4030664 | Proteinuric nephropathy due to diabetes mellitus                                            | Chronic kidney disease |
| 4149398 | Congenital renal failure                                                                    | Chronic kidney disease |
| 4153876 | Renal failure as a complication of care                                                     | Chronic kidney disease |
| 4170452 | Postoperative renal failure                                                                 | Chronic kidney disease |
| 4104770 | IgA nephropathy associated with liver disease                                               | Chronic kidney disease |
| 4206115 | Glomerulopathy due to diabetes mellitus                                                     | Chronic kidney disease |
| 4147577 | Intracapillary glomerulosclerosis of kidney due to diabetes mellitus                        | Chronic kidney disease |
| 4150547 | Anemia secondary to renal failure                                                           | Chronic kidney disease |
| 4151946 | Kimmelstiel-Wilson syndrome                                                                 | Chronic kidney disease |
| 443731  | Renal disorder due to type 2 diabetes mellitus                                              | Chronic kidney disease |
| 4222553 | Persistent proteinuria due to type 1 diabetes mellitus                                      | Chronic kidney disease |
| 4221487 | Persistent microalbuminuria due to type 2 diabetes mellitus                                 | Chronic kidney disease |
| 4222687 | Persistent microalbuminuria due to type 1 diabetes mellitus                                 | Chronic kidney disease |
| 200687  | Renal disorder due to type 1 diabetes mellitus                                              | Chronic kidney disease |
| 4223739 | Persistent proteinuria due to type 2 diabetes mellitus                                      | Chronic kidney disease |
| 4322556 | Chronic progressive renal failure                                                           | Chronic kidney disease |
| 4137220 | Diabetic glomerulonephritis                                                                 | Chronic kidney disease |
| 443614  | Chronic kidney disease stage 1                                                              | Chronic kidney disease |
| 443601  | Chronic kidney disease stage 2                                                              | Chronic kidney disease |

## SUPPORTING INFORMATION Newby 2022 Metformin versus sulfonylureas on Dementia and Parkinson's risk

|          |                                                                                             |                        |
|----------|---------------------------------------------------------------------------------------------|------------------------|
| 443612   | Chronic kidney disease stage 4                                                              | Chronic kidney disease |
| 443597   | Chronic kidney disease stage 3                                                              | Chronic kidney disease |
| 443611   | Chronic kidney disease stage 5                                                              | Chronic kidney disease |
| 40481596 | Autosomal dominant focal segmental glomerulosclerosis                                       | Chronic kidney disease |
| 40482458 | Macroalbuminuric nephropathy due to diabetes mellitus                                       | Chronic kidney disease |
| 40483353 | Autosomal recessive focal segmental glomerulosclerosis                                      | Chronic kidney disease |
| 40483372 | Familial immunoglobulin A nephropathy                                                       | Chronic kidney disease |
| 44784439 | Benign hypertensive renal disease with renal failure                                        | Chronic kidney disease |
| 45763854 | Chronic kidney disease stage 3A                                                             | Chronic kidney disease |
| 45763855 | Chronic kidney disease stage 3B                                                             | Chronic kidney disease |
| 45772751 | Hypertension concurrent and due to end stage renal disease on dialysis                      | Chronic kidney disease |
| 45772914 | Glomerulosclerosis of kidney due to diabetes mellitus                                       | Chronic kidney disease |
| 45768812 | Anemia in chronic kidney disease                                                            | Chronic kidney disease |
| 45768813 | Anemia in end stage renal disease                                                           | Chronic kidney disease |
| 46271022 | Chronic kidney disease                                                                      | Chronic kidney disease |
| 46273164 | End stage renal disease due to benign hypertension                                          | Chronic kidney disease |
| 37017104 | Chronic kidney disease mineral and bone disorder                                            | Chronic kidney disease |
| 37017425 | Renal failure syndrome co-occurrent with human immunodeficiency virus infection             | Chronic kidney disease |
| 37017586 | Focal segmental glomerulosclerosis co-occurrent with human immunodeficiency virus infection | Chronic kidney disease |
| 37017813 | Chronic kidney disease stage 5 on dialysis                                                  | Chronic kidney disease |
| 37018761 | Chronic kidney disease stage 5 with transplant                                              | Chronic kidney disease |
| 37018341 | Recurrent hematuria co-occurrent and due to dense deposit disease                           | Chronic kidney disease |
| 37018343 | Recurrent hematuria co-occurrent and due to diffuse crescentic glomerulonephritis           | Chronic kidney disease |
| 36716176 | Malignancy-associated membranous nephropathy                                                | Chronic kidney disease |
| 36716184 | Chronic kidney disease following donor nephrectomy                                          | Chronic kidney disease |
| 36716199 | Idiopathic membranous glomerulonephritis                                                    | Chronic kidney disease |
| 36717534 | Chronic kidney disease following excision of renal neoplasm                                 | Chronic kidney disease |
| 36717349 | Chronic kidney disease due to systemic infection                                            | Chronic kidney disease |
| 36716231 | Infection-associated membranous nephropathy                                                 | Chronic kidney disease |
| 36716455 | Chronic kidney disease due to traumatic loss of kidney                                      | Chronic kidney disease |
| 36716649 | Complement component 3 glomerulopathy                                                       | Chronic kidney disease |
| 36717583 | Dense deposit disease                                                                       | Chronic kidney disease |
| 36716651 | Complement component 3 glomerulonephritis                                                   | Chronic kidney disease |
| 36716947 | Chronic renal insufficiency                                                                 | Chronic kidney disease |
| 43531562 | Chronic kidney disease stage 5 due to type 2 diabetes mellitus                              | Chronic kidney disease |
| 43531577 | Chronic kidney disease stage 4 due to type 2 diabetes mellitus                              | Chronic kidney disease |
| 43531653 | Chronic kidney disease stage 3 due to type 2 diabetes mellitus                              | Chronic kidney disease |
| 43531566 | Chronic kidney disease stage 2 due to type 2 diabetes mellitus                              | Chronic kidney disease |
| 43531559 | Chronic kidney disease stage 1 due to type 2 diabetes mellitus                              | Chronic kidney disease |
| 43531578 | Chronic kidney disease due to type 2 diabetes mellitus                                      | Chronic kidney disease |
| 42872405 | Anemia, pre-end stage renal disease on erythropoietin protocol                              | Chronic kidney disease |
| 44784621 | Hypertensive heart and chronic kidney disease                                               | Chronic kidney disease |
| 44782728 | Hypertensive heart AND chronic kidney disease with congestive heart failure                 | Chronic kidney disease |
| 45757535 | Microalbuminuria due to type 1 diabetes mellitus                                            | Chronic kidney disease |
| 46270347 | Chronic nephritic syndrome with membranous glomerulonephritis                               | Chronic kidney disease |
| 45771064 | Hypertension in chronic kidney disease due to type 2 diabetes mellitus                      | Chronic kidney disease |
| 45769828 | Nephrotic syndrome due to type 2 diabetes mellitus                                          | Chronic kidney disease |
| 45771067 | Hypertension in chronic kidney disease due to type 1 diabetes mellitus                      | Chronic kidney disease |
| 45769829 | Nephrotic syndrome due to type 1 diabetes mellitus                                          | Chronic kidney disease |
| 45773576 | Chronic kidney disease stage 1 due to type 1 diabetes mellitus                              | Chronic kidney disease |
| 45769901 | Chronic kidney disease stage 2 due to type 1 diabetes mellitus                              | Chronic kidney disease |
| 45771075 | Chronic kidney disease stage 3 due to type 1 diabetes mellitus                              | Chronic kidney disease |
| 45769902 | Chronic kidney disease stage 4 due to type 1 diabetes mellitus                              | Chronic kidney disease |
| 45769903 | Chronic kidney disease stage 5 due to type 1 diabetes mellitus                              | Chronic kidney disease |
| 45769904 | End stage renal disease on dialysis due to type 1 diabetes mellitus                         | Chronic kidney disease |
| 45769905 | Microalbuminuria due to type 2 diabetes mellitus                                            | Chronic kidney disease |
| 45769906 | End stage renal disease on dialysis due to type 2 diabetes mellitus                         | Chronic kidney disease |
| 45773688 | Chronic kidney disease due to type 1 diabetes mellitus                                      | Chronic kidney disease |
| 44784637 | Hypertensive heart AND chronic kidney disease on dialysis                                   | Chronic kidney disease |
| 44784638 | Hypertensive heart AND chronic kidney disease stage 5                                       | Chronic kidney disease |
| 44784639 | Hypertensive heart AND chronic kidney disease stage 4                                       | Chronic kidney disease |
| 43021835 | Hypertensive heart AND chronic kidney disease stage 3                                       | Chronic kidney disease |
| 43021836 | Hypertensive heart AND chronic kidney disease stage 2                                       | Chronic kidney disease |
| 44784640 | Hypertensive heart AND chronic kidney disease stage 1                                       | Chronic kidney disease |
| 44782429 | Chronic kidney disease due to hypertension                                                  | Chronic kidney disease |

## SUPPORTING INFORMATION Newby 2022 Metformin versus sulfonylureas on Dementia and Parkinson's risk

|          |                                                                                                        |                        |
|----------|--------------------------------------------------------------------------------------------------------|------------------------|
| 37018886 | End stage renal disease due to hypertension                                                            | Chronic kidney disease |
| 44782703 | Chronic kidney disease stage 1 due to hypertension                                                     | Chronic kidney disease |
| 760850   | Benign hypertensive heart disease and chronic renal disease stage 5                                    | Chronic kidney disease |
| 45757392 | Hypertension concurrent and due to end stage renal disease on dialysis due to type 2 diabetes mellitus | Chronic kidney disease |
| 45757393 | Hypertension concurrent and due to end stage renal disease on dialysis due to type 1 diabetes mellitus | Chronic kidney disease |
| 44782689 | Chronic kidney disease stage 4 due to hypertension                                                     | Chronic kidney disease |
| 44782690 | Chronic kidney disease stage 5 due to hypertension                                                     | Chronic kidney disease |
| 44782691 | Chronic kidney disease stage 3 due to hypertension                                                     | Chronic kidney disease |
| 44782692 | Chronic kidney disease stage 2 due to hypertension                                                     | Chronic kidney disease |
| 45757444 | Hypertension in chronic kidney disease stage 5 due to type 2 diabetes mellitus                         | Chronic kidney disease |
| 45757445 | Hypertension in chronic kidney disease stage 4 due to type 2 diabetes mellitus                         | Chronic kidney disease |
| 45757446 | Hypertension in chronic kidney disease stage 3 due to type 2 diabetes mellitus                         | Chronic kidney disease |
| 45757447 | Hypertension in chronic kidney disease stage 2 due to type 2 diabetes mellitus                         | Chronic kidney disease |
| 43020437 | Malignant hypertensive chronic kidney disease stage 5                                                  | Chronic kidney disease |
| 44782717 | End stage renal disease on dialysis due to hypertension                                                | Chronic kidney disease |
| 45757499 | Proteinuria due to type 2 diabetes mellitus                                                            | Chronic kidney disease |
| 45770906 | Chronic proliferative glomerulonephritis                                                               | Chronic kidney disease |
| 45757604 | Proteinuria due to type 1 diabetes mellitus                                                            | Chronic kidney disease |
| 46270353 | Chronic kidney disease due to benign hypertension                                                      | Chronic kidney disease |
| 46270354 | Chronic kidney disease stage 1 due to benign hypertension                                              | Chronic kidney disease |
| 46270355 | Chronic kidney disease stage 2 due to benign hypertension                                              | Chronic kidney disease |
| 46273636 | Chronic kidney disease stage 3 due to benign hypertension                                              | Chronic kidney disease |
| 46273514 | Chronic kidney disease stage 4 due to benign hypertension                                              | Chronic kidney disease |
| 46270356 | Chronic kidney disease stage 5 due to benign hypertension                                              | Chronic kidney disease |
| 762001   | Benign hypertensive heart disease and chronic renal disease stage 3                                    | Chronic kidney disease |
| 765536   | Benign hypertensive heart disease and chronic renal disease stage 4                                    | Chronic kidney disease |
| 43021852 | Malignant hypertensive chronic kidney disease                                                          | Chronic kidney disease |
| 43020455 | Malignant hypertensive end stage renal disease                                                         | Chronic kidney disease |
| 43021853 | Malignant hypertensive chronic kidney disease stage 1                                                  | Chronic kidney disease |
| 43021854 | Malignant hypertensive chronic kidney disease stage 2                                                  | Chronic kidney disease |
| 43020456 | Malignant hypertensive chronic kidney disease stage 3                                                  | Chronic kidney disease |
| 43020457 | Malignant hypertensive chronic kidney disease stage 4                                                  | Chronic kidney disease |
| 43021864 | Malignant hypertensive end stage renal disease on dialysis                                             | Chronic kidney disease |
| 45757745 | Hereditary mesangiocapillary glomerulonephritis, type 2                                                | Chronic kidney disease |
| 45757748 | Hereditary diffuse mesangial proliferative glomerulonephritis                                          | Chronic kidney disease |
| 37016362 | Nephrotic syndrome co-occurrent and due to membranoproliferative glomerulonephritis type III           | Chronic kidney disease |
| 37016364 | Isolated proteinuria co-occurrent and due to membranoproliferative glomerulonephritis type III         | Chronic kidney disease |
| 762973   | Hypertensive end stage renal disease                                                                   | Chronic kidney disease |
| 764011   | Benign hypertensive heart disease and chronic renal disease                                            | Chronic kidney disease |
| 37019193 | Anemia co-occurrent and due to chronic kidney disease stage 3                                          | Chronic kidney disease |
| 255573   | Chronic obstructive lung disease                                                                       | COPD                   |
| 257004   | Acute exacerbation of chronic obstructive airways disease                                              | COPD                   |
| 261325   | Pulmonary emphysema                                                                                    | COPD                   |
| 4110056  | Chronic obstructive pulmonary disease with acute lower respiratory infection                           | COPD                   |
| 4115044  | Acute infective exacerbation of chronic obstructive airways disease                                    | COPD                   |
| 4286497  | Centriacinar emphysema                                                                                 | COPD                   |
| 259043   | Emphysematous bleb of lung                                                                             | COPD                   |
| 4177944  | Panacinar emphysema                                                                                    | COPD                   |
| 440748   | Interstitial emphysema of lung                                                                         | COPD                   |
| 4193588  | Moderate chronic obstructive pulmonary disease                                                         | COPD                   |
| 261895   | Compensatory emphysema                                                                                 | COPD                   |
| 4196712  | Mild chronic obstructive pulmonary disease                                                             | COPD                   |
| 4209097  | Severe chronic obstructive pulmonary disease                                                           | COPD                   |
| 46274062 | Asthma-chronic obstructive pulmonary disease overlap syndrome                                          | COPD                   |
| 46269701 | Chronic obstructive lung disease co-occurrent with acute bronchitis                                    | COPD                   |
| 4063381  | Chronic disease of respiratory system                                                                  | COPD                   |
| 4110048  | Chronic bullous emphysema                                                                              | COPD                   |
| 4046986  | End stage chronic obstructive airways disease                                                          | COPD                   |
| 43530693 | Acute exacerbation of chronic obstructive airways disease with asthma                                  | COPD                   |
| 44782563 | Pulmonary hypertension due to chronic obstructive pulmonary disease                                    | COPD                   |
| 4056405  | Obstructive emphysema                                                                                  | COPD                   |

## SUPPORTING INFORMATION Newby 2022 Metformin versus sulfonylureas on Dementia and Parkinson's risk

|          |                                                                                      |                            |
|----------|--------------------------------------------------------------------------------------|----------------------------|
| 4136683  | Paraseptal emphysema                                                                 | COPD                       |
| 4104506  | Cystic-bullous disease of the lung                                                   | COPD                       |
| 4050732  | Pulmonary emphysema in alpha-1 PI deficiency                                         | COPD                       |
| 4050961  | Giant bullous emphysema                                                              | COPD                       |
| 45769389 | Pulmonary emphysema co-occurrent with fibrosis of lung                               | COPD                       |
| 4166517  | Chronic obliterative bronchiolitis                                                   | COPD                       |
| 4288734  | Bronchiolar disease                                                                  | COPD                       |
| 4166508  | Congenital emphysema                                                                 | COPD                       |
| 4138392  | Chronic obliterative bronchiolitis due to inhalation of chemical fumes AND/OR vapors | COPD                       |
| 4050734  | Scar emphysema                                                                       | COPD                       |
| 4050733  | Toxic emphysema                                                                      | COPD                       |
| 4145496  | Bullous emphysema with collapse                                                      | COPD                       |
| 4148124  | Atrophic (senile) emphysema                                                          | COPD                       |
| 4278831  | Chronic diffuse emphysema due to inhalation of chemical fumes AND/OR vapors          | COPD                       |
| 4110635  | Segmental bullous emphysema                                                          | COPD                       |
| 4315386  | Ruptured emphysematous bleb of lung                                                  | COPD                       |
| 4112836  | Chronic emphysema due to chemical fumes                                              | COPD                       |
| 4112828  | Zonal bullous emphysema                                                              | COPD                       |
| 4083395  | Vanishing lung                                                                       | COPD                       |
| 44791725 | Very severe chronic obstructive pulmonary disease                                    | COPD                       |
| 315286   | Chronic ischemic heart disease                                                       | Coronary artery disease    |
| 317576   | Coronary arteriosclerosis                                                            | Coronary artery disease    |
| 319844   | Acute ischemic heart disease                                                         | Coronary artery disease    |
| 4185932  | Ischemic heart disease                                                               | Coronary artery disease    |
| 4155007  | Multi vessel coronary artery disease                                                 | Coronary artery disease    |
| 4187067  | Disorder of coronary artery                                                          | Coronary artery disease    |
| 4145696  | Ischemic congestive cardiomyopathy                                                   | Coronary artery disease    |
| 4185302  | Chronic myocardial ischemia                                                          | Coronary artery disease    |
| 45766164 | Heart failure with reduced ejection fraction                                         | Coronary artery disease    |
| 43020660 | Ischemic dilated cardiomyopathy due to coronary artery disease                       | Coronary artery disease    |
| 4155962  | Left main coronary artery disease                                                    | Coronary artery disease    |
| 36712982 | Unstable angina co-occurrent and due to coronary arteriosclerosis                    | Coronary artery disease    |
| 4263712  | Subendocardial ischemia                                                              | Coronary artery disease    |
| 4134586  | Chronic heart disease                                                                | Coronary artery disease    |
| 4119951  | Accelerated coronary artery disease in transplanted heart                            | Coronary artery disease    |
| 4168972  | Obliterative coronary artery disease                                                 | Coronary artery disease    |
| 36712983 | Angina co-occurrent and due to coronary arteriosclerosis                             | Coronary artery disease    |
| 45766165 | Heart failure with reduced ejection fraction due to coronary artery disease          | Coronary artery disease    |
| 37017177 | Subacute ischemic heart disease                                                      | Coronary artery disease    |
| 45766117 | Silent coronary vasospastic disease                                                  | Coronary artery disease    |
| 443614   | Chronic kidney disease stage 1                                                       | eGFR clinical code Stage 1 |
| 43021853 | Malignant hypertensive chronic kidney disease stage 1                                | eGFR clinical code Stage 1 |
| 43531559 | Chronic kidney disease stage 1 due to type 2 diabetes mellitus                       | eGFR clinical code Stage 1 |
| 44784640 | Hypertensive heart AND chronic kidney disease stage 1                                | eGFR clinical code Stage 1 |
| 46270354 | Chronic kidney disease stage 1 due to benign hypertension                            | eGFR clinical code Stage 1 |
| 44782703 | Chronic kidney disease stage 1 due to hypertension                                   | eGFR clinical code Stage 1 |
| 443601   | Chronic kidney disease stage 2                                                       | eGFR clinical code Stage 2 |
| 43531566 | Chronic kidney disease stage 2 due to type 2 diabetes mellitus                       | eGFR clinical code Stage 2 |
| 46270355 | Chronic kidney disease stage 2 due to benign hypertension                            | eGFR clinical code Stage 2 |
| 43021836 | Hypertensive heart AND chronic kidney disease stage 2                                | eGFR clinical code Stage 2 |
| 44782692 | Chronic kidney disease stage 2 due to hypertension                                   | eGFR clinical code Stage 2 |
| 45757447 | Hypertension in chronic kidney disease stage 2 due to type 2 diabetes mellitus       | eGFR clinical code Stage 2 |
| 43021854 | Malignant hypertensive chronic kidney disease stage 2                                | eGFR clinical code Stage 2 |
| 443597   | Chronic kidney disease stage 3                                                       | eGFR clinical code Stage 3 |
| 43531653 | Chronic kidney disease stage 3 due to type 2 diabetes mellitus                       | eGFR clinical code Stage 3 |
| 45763854 | Chronic kidney disease stage 3A                                                      | eGFR clinical code Stage 3 |
| 44782691 | Chronic kidney disease stage 3 due to hypertension                                   | eGFR clinical code Stage 3 |
| 46273636 | Chronic kidney disease stage 3 due to benign hypertension                            | eGFR clinical code Stage 3 |
| 43021835 | Hypertensive heart AND chronic kidney disease stage 3                                | eGFR clinical code Stage 3 |
| 37019193 | Anemia co-occurrent and due to chronic kidney disease stage 3                        | eGFR clinical code Stage 3 |
| 45763855 | Chronic kidney disease stage 3B                                                      | eGFR clinical code Stage 3 |
| 43020456 | Malignant hypertensive chronic kidney disease stage 3                                | eGFR clinical code Stage 3 |
| 45757446 | Hypertension in chronic kidney disease stage 3 due to type 2 diabetes mellitus       | eGFR clinical code Stage 3 |
| 762001   | Benign hypertensive heart disease and chronic renal disease stage 3                  | eGFR clinical code Stage 3 |
| 443612   | Chronic kidney disease stage 4                                                       | eGFR clinical code Stage 4 |
| 43531577 | Chronic kidney disease stage 4 due to type 2 diabetes mellitus                       | eGFR clinical code Stage 4 |
| 44782689 | Chronic kidney disease stage 4 due to hypertension                                   | eGFR clinical code Stage 4 |

## SUPPORTING INFORMATION Newby 2022 Metformin versus sulfonylureas on Dementia and Parkinson's risk

|          |                                                                                                                                                   |                            |
|----------|---------------------------------------------------------------------------------------------------------------------------------------------------|----------------------------|
| 44784639 | Hypertensive heart AND chronic kidney disease stage 4                                                                                             | eGFR clinical code Stage 4 |
| 37398911 | Anemia in chronic kidney disease stage 4                                                                                                          | eGFR clinical code Stage 4 |
| 43020457 | Malignant hypertensive chronic kidney disease stage 4                                                                                             | eGFR clinical code Stage 4 |
| 46273514 | Chronic kidney disease stage 4 due to benign hypertension                                                                                         | eGFR clinical code Stage 4 |
| 45757445 | Hypertension in chronic kidney disease stage 4 due to type 2 diabetes mellitus                                                                    | eGFR clinical code Stage 4 |
| 765536   | Benign hypertensive heart disease and chronic renal disease stage 4                                                                               | eGFR clinical code Stage 4 |
| 44782690 | Chronic kidney disease stage 5 due to hypertension                                                                                                | eGFR clinical code Stage 5 |
| 443611   | Chronic kidney disease stage 5                                                                                                                    | eGFR clinical code Stage 5 |
| 44784638 | Hypertensive heart AND chronic kidney disease stage 5                                                                                             | eGFR clinical code Stage 5 |
| 37017813 | Chronic kidney disease stage 5 on dialysis                                                                                                        | eGFR clinical code Stage 5 |
| 43531562 | Chronic kidney disease stage 5 due to type 2 diabetes mellitus                                                                                    | eGFR clinical code Stage 5 |
| 45757444 | Hypertension in chronic kidney disease stage 5 due to type 2 diabetes mellitus                                                                    | eGFR clinical code Stage 5 |
| 46270356 | Chronic kidney disease stage 5 due to benign hypertension                                                                                         | eGFR clinical code Stage 5 |
| 43020437 | Malignant hypertensive chronic kidney disease stage 5                                                                                             | eGFR clinical code Stage 5 |
| 760850   | Benign hypertensive heart disease and chronic renal disease stage 5                                                                               | eGFR clinical code Stage 5 |
| 37018761 | Chronic kidney disease stage 5 with transplant                                                                                                    | eGFR clinical code Stage 5 |
| 437541   | Glaucoma                                                                                                                                          | Eye Disease                |
| 376966   | Exudative age-related macular degeneration                                                                                                        | Eye Disease                |
| 372629   | Nonexudative age-related macular degeneration                                                                                                     | Eye Disease                |
| 379010   | Epiretinal membrane                                                                                                                               | Eye Disease                |
| 437851   | Open angle with borderline intraocular pressure                                                                                                   | Eye Disease                |
| 4102183  | Borderline glaucoma                                                                                                                               | Eye Disease                |
| 4109420  | Open-angle glaucoma - borderline                                                                                                                  | Eye Disease                |
| 381290   | Ocular hypertension                                                                                                                               | Eye Disease                |
| 376115   | Cystoid macular retinal degeneration                                                                                                              | Eye Disease                |
| 432312   | Chronic angle-closure glaucoma                                                                                                                    | Eye Disease                |
| 4288370  | Severe visual impairment                                                                                                                          | Eye Disease                |
| 435543   | Primary angle-closure glaucoma                                                                                                                    | Eye Disease                |
| 43531583 | Visual disturbance as sequela of cerebrovascular disease                                                                                          | Eye Disease                |
| 435809   | Steroid-induced glaucoma - borderline                                                                                                             | Eye Disease                |
| 377848   | Toxic maculopathy                                                                                                                                 | Eye Disease                |
| 377277   | Impairment level: total impairment of both eyes                                                                                                   | Eye Disease                |
| 374930   | Impairment level: profound impairment of both eyes                                                                                                | Eye Disease                |
| 374937   | Impairment level: better eye: near-total impairment: lesser-eye: not further specified                                                            | Eye Disease                |
| 372317   | Impairment level: better eye: near-total impairment: lesser eye: total impairment                                                                 | Eye Disease                |
| 381007   | Impairment level: better eye: profound impairment: lesser eye: not further specified                                                              | Eye Disease                |
| 381018   | Impairment level: better eye: profound impairment: lesser eye: total impairment                                                                   | Eye Disease                |
| 376693   | Impairment level: better eye: profound impairment: lesser eye: near-total impairment                                                              | Eye Disease                |
| 4191001  | Angle-closure glaucoma                                                                                                                            | Eye Disease                |
| 4090255  | Retinal drusen                                                                                                                                    | Eye Disease                |
| 4318985  | Degeneration of retina                                                                                                                            | Eye Disease                |
| 40481141 | Anatomical narrow angle glaucoma with borderline intraocular pressure                                                                             | Eye Disease                |
| 4158245  | Disorder of intraocular pressure                                                                                                                  | Eye Disease                |
| 42538611 | Acute headache due to traumatic injury of head                                                                                                    | Head Injury                |
| 4014656  | Brain contusion with open intracranial wound, with more than 1 hour loss of consciousness                                                         | Head Injury                |
| 4014655  | Brain contusion with open intracranial wound, with no loss of consciousness                                                                       | Head Injury                |
| 438590   | Brain injury with open intracranial wound                                                                                                         | Head Injury                |
| 441703   | Brain injury with open intracranial wound AND brief loss of consciousness                                                                         | Head Injury                |
| 435681   | Brain injury with open intracranial wound AND concussion                                                                                          | Head Injury                |
| 440551   | Brain injury with open intracranial wound AND loss of consciousness                                                                               | Head Injury                |
| 439945   | Brain injury with open intracranial wound AND moderate loss of consciousness                                                                      | Head Injury                |
| 438280   | Brain injury with open intracranial wound AND no loss of consciousness                                                                            | Head Injury                |
| 439943   | Brain injury with open intracranial wound AND prolonged loss of consciousness (more than 24 hours) AND return to pre-existing conscious level     | Head Injury                |
| 434504   | Brain injury with open intracranial wound AND prolonged loss of consciousness (more than 24 hours) without return to pre-existing conscious level | Head Injury                |
| 4234112  | Brain injury without open intracranial wound                                                                                                      | Head Injury                |

## SUPPORTING INFORMATION Newby 2022 Metformin versus sulfonylureas on Dementia and Parkinson's risk

|         |                                                                                                                                                                   |             |
|---------|-------------------------------------------------------------------------------------------------------------------------------------------------------------------|-------------|
| 4331317 | Brain injury without open intracranial wound AND with brief loss of consciousness                                                                                 | Head Injury |
| 373056  | Brain injury without open intracranial wound AND with concussion                                                                                                  | Head Injury |
| 381978  | Brain injury without open intracranial wound AND with loss of consciousness                                                                                       | Head Injury |
| 443944  | Brain injury without open intracranial wound AND with moderate loss of consciousness                                                                              | Head Injury |
| 4195439 | Brain injury without open intracranial wound AND with no loss of consciousness                                                                                    | Head Injury |
| 375366  | Brain injury without open intracranial wound AND with prolonged loss of consciousness (more than 24 hours) with return to pre-existing conscious level            | Head Injury |
| 381416  | Brain injury without open intracranial wound AND with prolonged loss of consciousness (more than 24 hours) without return to pre-existing conscious level         | Head Injury |
| 4191596 | Brain injury, without skull fracture                                                                                                                              | Head Injury |
| 4133021 | Brain stem contusion                                                                                                                                              | Head Injury |
| 444248  | Brain stem contusion with open intracranial wound                                                                                                                 | Head Injury |
| 442302  | Brain stem contusion with open intracranial wound AND brief loss of consciousness                                                                                 | Head Injury |
| 442616  | Brain stem contusion with open intracranial wound AND loss of consciousness                                                                                       | Head Injury |
| 443762  | Brain stem contusion with open intracranial wound AND moderate loss of consciousness                                                                              | Head Injury |
| 442279  | Brain stem contusion with open intracranial wound AND no loss of consciousness                                                                                    | Head Injury |
| 443886  | Brain stem contusion with open intracranial wound AND prolonged loss of consciousness (more than 24 hours) AND return to pre-existing conscious level             | Head Injury |
| 442327  | Brain stem contusion with open intracranial wound AND prolonged loss of consciousness (more than 24 hours) without return to pre-existing conscious level         | Head Injury |
| 442280  | Brain stem contusion without open intracranial wound                                                                                                              | Head Injury |
| 442260  | Brain stem contusion without open intracranial wound AND with brief loss of consciousness                                                                         | Head Injury |
| 375680  | Brain stem contusion without open intracranial wound AND with concussion                                                                                          | Head Injury |
| 443798  | Brain stem contusion without open intracranial wound AND with loss of consciousness                                                                               | Head Injury |
| 444047  | Brain stem contusion without open intracranial wound AND with moderate loss of consciousness                                                                      | Head Injury |
| 444061  | Brain stem contusion without open intracranial wound AND with no loss of consciousness                                                                            | Head Injury |
| 444088  | Brain stem contusion without open intracranial wound AND with prolonged loss of consciousness (more than 24 hours) AND return to pre-existing conscious level     | Head Injury |
| 442607  | Brain stem contusion without open intracranial wound AND with prolonged loss of consciousness (more than 24 hours) without return to pre-existing conscious level | Head Injury |
| 4132548 | Brain stem laceration                                                                                                                                             | Head Injury |
| 444217  | Brain stem laceration with open intracranial wound                                                                                                                | Head Injury |
| 442548  | Brain stem laceration with open intracranial wound AND brief loss of consciousness                                                                                | Head Injury |
| 442318  | Brain stem laceration with open intracranial wound AND concussion                                                                                                 | Head Injury |
| 443799  | Brain stem laceration with open intracranial wound AND loss of consciousness                                                                                      | Head Injury |
| 442265  | Brain stem laceration with open intracranial wound AND prolonged loss of consciousness (more than 24 hours) AND return to pre-existing conscious level            | Head Injury |
| 442621  | Brain stem laceration with open intracranial wound AND prolonged loss of consciousness (more than 24 hours) without return to pre-existing conscious level        | Head Injury |
| 444398  | Brain stem laceration without open intracranial wound                                                                                                             | Head Injury |
| 4133020 | Cerebellar contusion                                                                                                                                              | Head Injury |
| 434506  | Cerebellar contusion with open intracranial wound                                                                                                                 | Head Injury |
| 439170  | Cerebellar contusion with open intracranial wound AND concussion                                                                                                  | Head Injury |
| 441439  | Cerebellar contusion with open intracranial wound AND no loss of consciousness                                                                                    | Head Injury |
| 434190  | Cerebellar contusion without open intracranial wound                                                                                                              | Head Injury |
| 437697  | Cerebellar contusion without open intracranial wound AND with brief loss of consciousness                                                                         | Head Injury |
| 443931  | Cerebellar contusion without open intracranial wound AND with concussion                                                                                          | Head Injury |



## SUPPORTING INFORMATION Newby 2022 Metformin versus sulfonylureas on Dementia and Parkinson's risk

|          |                                                                                                                                                                    |             |
|----------|--------------------------------------------------------------------------------------------------------------------------------------------------------------------|-------------|
| 434191   | Cerebellar contusion without open intracranial wound AND with moderate loss of consciousness                                                                       | Head Injury |
| 435679   | Cerebellar contusion without open intracranial wound AND with no loss of consciousness                                                                             | Head Injury |
| 433049   | Cerebellar contusion without open intracranial wound AND with prolonged loss of consciousness (more than 24 hours) AND return to pre-existing conscious level      | Head Injury |
| 4133716  | Cerebellar laceration                                                                                                                                              | Head Injury |
| 4094846  | Cerebellar laceration and contusion                                                                                                                                | Head Injury |
| 435953   | Cerebellar laceration with open intracranial wound                                                                                                                 | Head Injury |
| 444266   | Cerebellar laceration with open intracranial wound AND moderate loss of consciousness                                                                              | Head Injury |
| 440235   | Cerebellar laceration with open intracranial wound AND no loss of consciousness                                                                                    | Head Injury |
| 434197   | Cerebellar laceration without open intracranial wound                                                                                                              | Head Injury |
| 433892   | Cerebellar laceration without open intracranial wound AND with brief loss of consciousness                                                                         | Head Injury |
| 442567   | Cerebellar laceration without open intracranial wound AND with concussion                                                                                          | Head Injury |
| 440560   | Cerebellar laceration without open intracranial wound AND with loss of consciousness                                                                               | Head Injury |
| 443924   | Cerebellar laceration without open intracranial wound AND with moderate loss of consciousness                                                                      | Head Injury |
| 438893   | Cerebellar laceration without open intracranial wound AND with no loss of consciousness                                                                            | Head Injury |
| 438589   | Cerebellar laceration without open intracranial wound AND with prolonged loss of consciousness (more than 24 hours) AND return to pre-existing conscious level     | Head Injury |
| 442760   | Cerebellar laceration without open intracranial wound AND with prolonged loss of consciousness (more than 24 hours) without return to pre-existing conscious level | Head Injury |
| 4264035  | Cerebral compression due to injury                                                                                                                                 | Head Injury |
| 376552   | Cerebral laceration and contusion                                                                                                                                  | Head Injury |
| 4170449  | Cerebral trauma                                                                                                                                                    | Head Injury |
| 4016961  | Closed cerebral contusion                                                                                                                                          | Head Injury |
| 40488380 | Closed depressed fracture of skull                                                                                                                                 | Head Injury |
| 433039   | Closed fracture of alveolar border of body of mandible                                                                                                             | Head Injury |
| 4003191  | Closed fracture of alveolar ridge of maxilla                                                                                                                       | Head Injury |
| 378573   | Closed fracture of base of skull with cerebral laceration AND/OR contusion                                                                                         | Head Injury |
| 44784469 | Closed fracture of base of skull with concussion                                                                                                                   | Head Injury |
| 438873   | Closed fracture of base of skull with intracranial hemorrhage                                                                                                      | Head Injury |
| 433602   | Closed fracture of base of skull with intracranial injury                                                                                                          | Head Injury |
| 437990   | Closed fracture of base of skull with intracranial injury, with no loss of consciousness                                                                           | Head Injury |
| 44784468 | Closed fracture of base of skull with loss of consciousness                                                                                                        | Head Injury |
| 433606   | Closed fracture of base of skull without intracranial injury                                                                                                       | Head Injury |
| 4159165  | Closed fracture of skull                                                                                                                                           | Head Injury |
| 40483811 | Closed fracture of vault of skull                                                                                                                                  | Head Injury |
| 374753   | Closed fracture of vault of skull with cerebral laceration AND/OR contusion                                                                                        | Head Injury |
| 44784465 | Closed fracture of vault of skull with concussion                                                                                                                  | Head Injury |
| 434166   | Closed fracture of vault of skull with intracranial hemorrhage                                                                                                     | Head Injury |
| 437105   | Closed fracture of vault of skull with intracranial injury, with no loss of consciousness                                                                          | Head Injury |
| 44784464 | Closed fracture of vault of skull with loss of consciousness                                                                                                       | Head Injury |
| 441133   | Closed fracture of vault of skull without intracranial injury                                                                                                      | Head Injury |
| 4165868  | Closed fracture of zygoma                                                                                                                                          | Head Injury |
| 4150497  | Closed fracture of zygomatic arch                                                                                                                                  | Head Injury |
| 4001332  | Closed fracture of zygomatic tripod                                                                                                                                | Head Injury |
| 438575   | Closed fracture vault of skull with intracranial injury                                                                                                            | Head Injury |
| 4019350  | Closed hindbrain contusion                                                                                                                                         | Head Injury |
| 42873007 | Closed injury of head                                                                                                                                              | Head Injury |
| 4003841  | Closed pyramidal fracture of maxilla                                                                                                                               | Head Injury |
| 440850   | Closed skull fracture with cerebral laceration AND/OR contusion                                                                                                    | Head Injury |
| 440537   | Closed skull fracture with intracranial hemorrhage                                                                                                                 | Head Injury |
| 435662   | Closed skull fracture with intracranial injury                                                                                                                     | Head Injury |
| 432742   | Closed skull fracture without intracranial injury                                                                                                                  | Head Injury |
| 4014781  | Closed traumatic subdural hemorrhage                                                                                                                               | Head Injury |
| 4339479  | Complex fracture of temporal bone                                                                                                                                  | Head Injury |
| 4001336  | Concussion injury of brain                                                                                                                                         | Head Injury |
| 40492393 | Concussion injury of cerebrum                                                                                                                                      | Head Injury |

## SUPPORTING INFORMATION Newby 2022 Metformin versus sulfonylureas on Dementia and Parkinson's risk

|         |                                                                                                                                                               |             |
|---------|---------------------------------------------------------------------------------------------------------------------------------------------------------------|-------------|
| 4016958 | Concussion with 1-24 hours loss of consciousness                                                                                                              | Head Injury |
| 4019263 | Concussion with less than 1 hour loss of consciousness                                                                                                        | Head Injury |
| 375671  | Concussion with loss of consciousness                                                                                                                         | Head Injury |
| 4297140 | Concussion with mental confusion AND/OR disorientation without loss of consciousness                                                                          | Head Injury |
| 4019264 | Concussion with more than 24 hours loss of consciousness and return to pre-existing conscious level                                                           | Head Injury |
| 4016959 | Concussion with more than 24 hours loss of consciousness without return to pre-existing conscious level                                                       | Head Injury |
| 4146496 | Contusion of brain                                                                                                                                            | Head Injury |
| 4222768 | Contusion of brain with open intracranial wound                                                                                                               | Head Injury |
| 4236742 | Contusion of brain without open intracranial wound                                                                                                            | Head Injury |
| 4001854 | Contusion of buccal mucosa                                                                                                                                    | Head Injury |
| 4034021 | Contusion of cerebral cortex                                                                                                                                  | Head Injury |
| 4094847 | Contusion of cerebrum                                                                                                                                         | Head Injury |
| 4333982 | Contusion of eyelid                                                                                                                                           | Head Injury |
| 4054068 | Contusion of face                                                                                                                                             | Head Injury |
| 4002834 | Contusion of floor of mouth                                                                                                                                   | Head Injury |
| 4001851 | Contusion of forehead                                                                                                                                         | Head Injury |
| 4094836 | Contusion of gingivae                                                                                                                                         | Head Injury |
| 432751  | Cortex contusion with open intracranial wound                                                                                                                 | Head Injury |
| 440550  | Cortex contusion with open intracranial wound AND concussion                                                                                                  | Head Injury |
| 434774  | Cortex contusion with open intracranial wound AND loss of consciousness                                                                                       | Head Injury |
| 443192  | Cortex contusion with open intracranial wound, with 1-24 hours loss of consciousness                                                                          | Head Injury |
| 443193  | Cortex contusion with open intracranial wound, with less than 1 hour loss of consciousness                                                                    | Head Injury |
| 435388  | Cortex contusion with open intracranial wound, with more than 24 hours loss of consciousness and return to pre-existing conscious level                       | Head Injury |
| 438002  | Cortex contusion with open intracranial wound, with more than 24 hours loss of consciousness without return to pre-existing conscious level                   | Head Injury |
| 438588  | Cortex contusion with open intracranial wound, with no loss of consciousness                                                                                  | Head Injury |
| 440858  | Cortex contusion without open intracranial wound                                                                                                              | Head Injury |
| 441146  | Cortex contusion without open intracranial wound AND with brief loss of consciousness                                                                         | Head Injury |
| 440868  | Cortex contusion without open intracranial wound AND with concussion                                                                                          | Head Injury |
| 433342  | Cortex contusion without open intracranial wound AND with loss of consciousness                                                                               | Head Injury |
| 439184  | Cortex contusion without open intracranial wound AND with moderate loss of consciousness                                                                      | Head Injury |
| 436547  | Cortex contusion without open intracranial wound AND with no loss of consciousness                                                                            | Head Injury |
| 435678  | Cortex contusion without open intracranial wound AND with prolonged loss of consciousness (more than 24 hours) AND return to pre-existing conscious level     | Head Injury |
| 439181  | Cortex contusion without open intracranial wound AND with prolonged loss of consciousness (more than 24 hours) without return to pre-existing conscious level | Head Injury |
| 4133019 | Cortex laceration                                                                                                                                             | Head Injury |
| 432476  | Cortex laceration with open intracranial wound                                                                                                                | Head Injury |
| 444379  | Cortex laceration with open intracranial wound AND concussion                                                                                                 | Head Injury |
| 442114  | Cortex laceration with open intracranial wound AND loss of consciousness                                                                                      | Head Injury |
| 437414  | Cortex laceration with open intracranial wound, with 1-24 hours loss of consciousness                                                                         | Head Injury |
| 443122  | Cortex laceration with open intracranial wound, with less than 1 hour loss of consciousness                                                                   | Head Injury |
| 443121  | Cortex laceration with open intracranial wound, with more than 24 hours loss of consciousness and return to pre-existing conscious level                      | Head Injury |
| 443120  | Cortex laceration with open intracranial wound, with more than 24 hours loss of consciousness without return to pre-existing conscious level                  | Head Injury |
| 435384  | Cortex laceration with open intracranial wound, with no loss of consciousness                                                                                 | Head Injury |
| 435110  | Cortex laceration without open intracranial wound                                                                                                             | Head Injury |
| 438883  | Cortex laceration without open intracranial wound AND with brief loss of consciousness                                                                        | Head Injury |

## SUPPORTING INFORMATION Newby 2022 Metformin versus sulfonylureas on Dementia and Parkinson's risk

|          |                                                                                                                                                                                     |             |
|----------|-------------------------------------------------------------------------------------------------------------------------------------------------------------------------------------|-------------|
| 378008   | Cortex laceration without open intracranial wound AND with concussion                                                                                                               | Head Injury |
| 441431   | Cortex laceration without open intracranial wound AND with loss of consciousness                                                                                                    | Head Injury |
| 442330   | Cortex laceration without open intracranial wound AND with moderate loss of consciousness                                                                                           | Head Injury |
| 436554   | Cortex laceration without open intracranial wound AND with no loss of consciousness                                                                                                 | Head Injury |
| 434196   | Cortex laceration without open intracranial wound AND with prolonged loss of consciousness (more than 24 hours) AND return to pre-existing conscious level                          | Head Injury |
| 442557   | Cortex laceration without open intracranial wound AND with prolonged loss of consciousness (more than 24 hours) without return to pre-existing conscious level                      | Head Injury |
| 36715609 | Crush injury of brain                                                                                                                                                               | Head Injury |
| 4152480  | Crush injury of head and neck                                                                                                                                                       | Head Injury |
| 4057350  | Crushing injury of skull                                                                                                                                                            | Head Injury |
| 4095860  | Crushing injury of skull and intracranial contents                                                                                                                                  | Head Injury |
| 4154439  | Degloving injury of head                                                                                                                                                            | Head Injury |
| 4320021  | Depressed fracture of skull                                                                                                                                                         | Head Injury |
| 4096616  | Diffuse brain injury                                                                                                                                                                | Head Injury |
| 435960   | Extradural hemorrhage following injury with open intracranial wound                                                                                                                 | Head Injury |
| 432475   | Extradural hemorrhage following injury with open intracranial wound AND brief loss of consciousness                                                                                 | Head Injury |
| 434508   | Extradural hemorrhage following injury with open intracranial wound AND concussion                                                                                                  | Head Injury |
| 438279   | Extradural hemorrhage following injury with open intracranial wound AND loss of consciousness                                                                                       | Head Injury |
| 442341   | Extradural hemorrhage following injury with open intracranial wound AND moderate loss of consciousness                                                                              | Head Injury |
| 436258   | Extradural hemorrhage following injury with open intracranial wound AND prolonged loss of consciousness (more than 24 hours) AND return to pre-existing conscious level             | Head Injury |
| 439949   | Extradural hemorrhage following injury with open intracranial wound AND prolonged loss of consciousness (more than 24 hours) without return to pre-existing conscious level         | Head Injury |
| 433051   | Extradural hemorrhage following injury with open intracranial wound, with no loss of consciousness                                                                                  | Head Injury |
| 252477   | Extradural hemorrhage following injury without open intracranial wound                                                                                                              | Head Injury |
| 261433   | Extradural hemorrhage following injury without open intracranial wound AND with brief loss of consciousness                                                                         | Head Injury |
| 381440   | Extradural hemorrhage following injury without open intracranial wound AND with concussion                                                                                          | Head Injury |
| 255105   | Extradural hemorrhage following injury without open intracranial wound AND with loss of consciousness                                                                               | Head Injury |
| 256844   | Extradural hemorrhage following injury without open intracranial wound AND with moderate loss of consciousness                                                                      | Head Injury |
| 441432   | Extradural hemorrhage following injury without open intracranial wound AND with no loss of consciousness                                                                            | Head Injury |
| 256556   | Extradural hemorrhage following injury without open intracranial wound AND with prolonged loss of consciousness (more than 24 hours) AND return to pre-existing conscious level     | Head Injury |
| 436557   | Extradural hemorrhage following injury without open intracranial wound AND with prolonged loss of consciousness (more than 24 hours) without return to pre-existing conscious level | Head Injury |
| 4016540  | Focal brain injury                                                                                                                                                                  | Head Injury |
| 36716567 | Focal hemorrhagic contusion of cerebrum                                                                                                                                             | Head Injury |
| 36716626 | Focal laceration of cerebellum                                                                                                                                                      | Head Injury |
| 36716572 | Focal traumatic hematoma of cerebellum                                                                                                                                              | Head Injury |
| 4082029  | Fracture of base of skull                                                                                                                                                           | Head Injury |
| 4132427  | Fracture of occipital condyle                                                                                                                                                       | Head Injury |
| 36717462 | Fracture of occipital condyle of skull type I                                                                                                                                       | Head Injury |
| 36715597 | Fracture of occipital condyle of skull type II                                                                                                                                      | Head Injury |
| 36715598 | Fracture of occipital condyle of skull type III                                                                                                                                     | Head Injury |
| 4320022  | Fracture of orbit                                                                                                                                                                   | Head Injury |
| 4324690  | Fracture of skull                                                                                                                                                                   | Head Injury |
| 4011508  | Fracture of skull and facial bones                                                                                                                                                  | Head Injury |
| 4181926  | Fracture of sphenoid bone                                                                                                                                                           | Head Injury |
| 4168152  | Fracture of vault of skull                                                                                                                                                          | Head Injury |
| 4154162  | Head and neck injury                                                                                                                                                                | Head Injury |
| 36716800 | Headache due to injury of head and neck                                                                                                                                             | Head Injury |
| 4152162  | Injury of back of head                                                                                                                                                              | Head Injury |

## SUPPORTING INFORMATION Newby 2022 Metformin versus sulfonylureas on Dementia and Parkinson's risk

|          |                                                                                                                                                                                   |             |
|----------|-----------------------------------------------------------------------------------------------------------------------------------------------------------------------------------|-------------|
| 4152164  | Injury of forehead                                                                                                                                                                | Head Injury |
| 375415   | Injury of head                                                                                                                                                                    | Head Injury |
| 4320020  | Injury of head with otorrhagia                                                                                                                                                    | Head Injury |
| 4133008  | Injury of head with rhinorrhagia                                                                                                                                                  | Head Injury |
| 444197   | Intracranial hemorrhage following injury with brief loss of consciousness                                                                                                         | Head Injury |
| 440561   | Intracranial hemorrhage following injury with intracranial wound AND moderate loss of consciousness                                                                               | Head Injury |
| 444198   | Intracranial hemorrhage following injury with loss of consciousness                                                                                                               | Head Injury |
| 444196   | Intracranial hemorrhage following injury with moderate loss of consciousness                                                                                                      | Head Injury |
| 434785   | Intracranial hemorrhage following injury with open intracranial wound                                                                                                             | Head Injury |
| 433623   | Intracranial hemorrhage following injury with open intracranial wound AND brief loss of consciousness                                                                             | Head Injury |
| 439950   | Intracranial hemorrhage following injury with open intracranial wound AND concussion                                                                                              | Head Injury |
| 433624   | Intracranial hemorrhage following injury with open intracranial wound AND loss of consciousness                                                                                   | Head Injury |
| 433052   | Intracranial hemorrhage following injury with open intracranial wound AND no loss of consciousness                                                                                | Head Injury |
| 441158   | Intracranial hemorrhage following injury with open intracranial wound AND prolonged loss of consciousness (more than 24 hours) AND return to pre-existing conscious level         | Head Injury |
| 435672   | Intracranial hemorrhage following injury with open intracranial wound and prolonged loss of consciousness (more than 24 hours) without return to pre-existing level               | Head Injury |
| 436526   | Intracranial hemorrhage following injury with prolonged loss of consciousness AND return to pre-existing conscious level                                                          | Head Injury |
| 437106   | Intracranial hemorrhage following injury with prolonged loss of consciousness without return to pre-existing conscious level                                                      | Head Injury |
| 436841   | Intracranial hemorrhage following injury without intracranial wound AND with moderate loss of consciousness                                                                       | Head Injury |
| 4009796  | Intracranial hemorrhage following injury without open intracranial wound                                                                                                          | Head Injury |
| 438596   | Intracranial hemorrhage following injury without open intracranial wound AND with brief loss of consciousness                                                                     | Head Injury |
| 432478   | Intracranial hemorrhage following injury without open intracranial wound AND with concussion                                                                                      | Head Injury |
| 433058   | Intracranial hemorrhage following injury without open intracranial wound AND with loss of consciousness                                                                           | Head Injury |
| 440869   | Intracranial hemorrhage following injury without open intracranial wound AND with no loss of consciousness                                                                        | Head Injury |
| 436842   | Intracranial hemorrhage following injury without open intracranial wound AND with prolonged loss of consciousness (more than 24 hours) AND return to pre-existing conscious level | Head Injury |
| 432764   | Intracranial hemorrhage following injury without open intracranial wound AND with prolonged loss of consciousness (more than 24 hours) without return to pre-existing level       | Head Injury |
| 437409   | Intracranial injury                                                                                                                                                               | Head Injury |
| 437409   | Intracranial injury                                                                                                                                                               | Head Injury |
| 437385   | Intracranial injury with loss of consciousness                                                                                                                                    | Head Injury |
| 4016541  | Intracranial injury with prolonged coma                                                                                                                                           | Head Injury |
| 4181760  | Intracranial injury, without skull fracture                                                                                                                                       | Head Injury |
| 4193520  | Laceration of brain                                                                                                                                                               | Head Injury |
| 4038534  | Laceration of brain with open intracranial wound                                                                                                                                  | Head Injury |
| 4208112  | Laceration of brain without open intracranial wound                                                                                                                               | Head Injury |
| 4095993  | Laceration of cerebrum                                                                                                                                                            | Head Injury |
| 40482446 | Linear fracture of vault of skull                                                                                                                                                 | Head Injury |
| 4200423  | Major head injury                                                                                                                                                                 | Head Injury |
| 4164341  | Minor head injury                                                                                                                                                                 | Head Injury |
| 4197180  | Moderate head injury                                                                                                                                                              | Head Injury |
| 36716576 | Multiple focal injuries of cerebellum                                                                                                                                             | Head Injury |
| 435376   | Multiple fractures involving skull and facial bones                                                                                                                               | Head Injury |
| 4169757  | Multiple fractures of skull                                                                                                                                                       | Head Injury |
| 4057179  | Multiple injuries of head                                                                                                                                                         | Head Injury |
| 437685   | Multiple open fractures of skull AND/OR face without intracranial injury                                                                                                          | Head Injury |
| 36716583 | Multiple traumatic hemorrhages of brain tissue                                                                                                                                    | Head Injury |
| 4019347  | Open cerebral contusion                                                                                                                                                           | Head Injury |
| 40486903 | Open depressed fracture of skull                                                                                                                                                  | Head Injury |
| 40490826 | Open fracture of base of skull                                                                                                                                                    | Head Injury |
| 378264   | Open fracture of base of skull with cerebral laceration AND contusion                                                                                                             | Head Injury |
| 435378   | Open fracture of base of skull with intracranial hemorrhage                                                                                                                       | Head Injury |

## SUPPORTING INFORMATION Newby 2022 Metformin versus sulfonylureas on Dementia and Parkinson's risk

|          |                                                                                                                                                                                           |             |
|----------|-------------------------------------------------------------------------------------------------------------------------------------------------------------------------------------------|-------------|
| 436818   | Open fracture of base of skull with intracranial injury                                                                                                                                   | Head Injury |
| 4010871  | Open fracture of base of skull with intracranial injury, with no loss of consciousness                                                                                                    | Head Injury |
| 439933   | Open fracture of base of skull without intracranial injury                                                                                                                                | Head Injury |
| 439384   | Open fracture of skull                                                                                                                                                                    | Head Injury |
| 4280518  | Open fracture of superior maxilla                                                                                                                                                         | Head Injury |
| 435660   | Open fracture of symphysis of body of mandible                                                                                                                                            | Head Injury |
| 40481145 | Open fracture of vault of skull                                                                                                                                                           | Head Injury |
| 433876   | Open fracture of vault of skull with cerebral laceration AND/OR contusion                                                                                                                 | Head Injury |
| 433037   | Open fracture of vault of skull with intracranial hemorrhage                                                                                                                              | Head Injury |
| 4007910  | Open fracture of vault of skull with intracranial injury, with no loss of consciousness                                                                                                   | Head Injury |
| 4221998  | Open fracture of zygoma                                                                                                                                                                   | Head Injury |
| 4237920  | Open fracture of zygomatic arch                                                                                                                                                           | Head Injury |
| 4001333  | Open fracture of zygomatic tripod                                                                                                                                                         | Head Injury |
| 439143   | Open fracture vault of skull with intracranial injury                                                                                                                                     | Head Injury |
| 441134   | Open fracture vault of skull without intracranial injury                                                                                                                                  | Head Injury |
| 441971   | Open skull fracture with cerebral laceration AND/OR contusion                                                                                                                             | Head Injury |
| 435931   | Open skull fracture with intracranial hemorrhage                                                                                                                                          | Head Injury |
| 437386   | Open skull fracture with intracranial injury                                                                                                                                              | Head Injury |
| 440221   | Open skull fracture without intracranial injury                                                                                                                                           | Head Injury |
| 37110500 | Parkinsonism due to and following injury of head                                                                                                                                          | Head Injury |
| 4116573  | Peripheral nerve injury of head and neck                                                                                                                                                  | Head Injury |
| 42538612 | Persistent headache due to and following injury of head                                                                                                                                   | Head Injury |
| 4153252  | Puncture wound of forehead                                                                                                                                                                | Head Injury |
| 4155186  | Puncture wound of head                                                                                                                                                                    | Head Injury |
| 4235306  | Repeated concussion                                                                                                                                                                       | Head Injury |
| 4108943  | Sequelae of injuries of head                                                                                                                                                              | Head Injury |
| 4050689  | Sequelae of superficial injury of head                                                                                                                                                    | Head Injury |
| 4151663  | Stab wound of forehead                                                                                                                                                                    | Head Injury |
| 4153083  | Stab wound of head                                                                                                                                                                        | Head Injury |
| 441709   | Subarachnoid hemorrhage following injury with open intracranial wound                                                                                                                     | Head Injury |
| 435964   | Subarachnoid hemorrhage following injury with open intracranial wound AND brief loss of consciousness                                                                                     | Head Injury |
| 373057   | Subarachnoid hemorrhage following injury with open intracranial wound AND concussion                                                                                                      | Head Injury |
| 440244   | Subarachnoid hemorrhage following injury with open intracranial wound AND loss of consciousness                                                                                           | Head Injury |
| 440251   | Subarachnoid hemorrhage following injury with open intracranial wound AND moderate loss of consciousness                                                                                  | Head Injury |
| 438894   | Subarachnoid hemorrhage following injury with open intracranial wound AND prolonged loss of consciousness (more than 24 hours) AND return to pre-existing conscious level                 | Head Injury |
| 439171   | Subarachnoid hemorrhage following injury with open intracranial wound AND prolonged loss of consciousness (more than 24 hours) without return to pre-existing conscious level             | Head Injury |
| 435104   | Subarachnoid hemorrhage following injury with open intracranial wound, with no loss of consciousness                                                                                      | Head Injury |
| 435959   | Subarachnoid hemorrhage following injury without open intracranial wound                                                                                                                  | Head Injury |
| 434789   | Subarachnoid hemorrhage following injury without open intracranial wound AND with brief loss of consciousness                                                                             | Head Injury |
| 440250   | Subarachnoid hemorrhage following injury without open intracranial wound AND with concussion                                                                                              | Head Injury |
| 438003   | Subarachnoid hemorrhage following injury without open intracranial wound AND with loss of consciousness                                                                                   | Head Injury |
| 439182   | Subarachnoid hemorrhage following injury without open intracranial wound AND with moderate loss of consciousness                                                                          | Head Injury |
| 439944   | Subarachnoid hemorrhage following injury without open intracranial wound AND with no loss of consciousness                                                                                | Head Injury |
| 435390   | Subarachnoid hemorrhage following injury without open intracranial wound AND with prolonged loss of consciousness (more than 24 hours) AND return to pre-existing conscious level         | Head Injury |
| 437413   | Subarachnoid hemorrhage following injury without open intracranial wound AND with prolonged loss of consciousness (more than 24 hours) AND without return to pre-existing conscious level | Head Injury |
| 432752   | Subdural hemorrhage following injury with open intracranial wound AND brief loss of consciousness                                                                                         | Head Injury |
| 433050   | Subdural hemorrhage following injury with open intracranial wound AND concussion                                                                                                          | Head Injury |

## SUPPORTING INFORMATION Newby 2022 Metformin versus sulfonylureas on Dementia and Parkinson's risk

|          |                                                                                                                                                                                   |              |
|----------|-----------------------------------------------------------------------------------------------------------------------------------------------------------------------------------|--------------|
| 439194   | Subdural hemorrhage following injury with open intracranial wound AND loss of consciousness                                                                                       | Head Injury  |
| 441985   | Subdural hemorrhage following injury with open intracranial wound AND moderate loss of consciousness                                                                              | Head Injury  |
| 436553   | Subdural hemorrhage following injury with open intracranial wound AND prolonged loss of consciousness (more than 24 hours) AND return to pre-existing conscious level             | Head Injury  |
| 432474   | Subdural hemorrhage following injury with open intracranial wound and prolonged loss of consciousness (more than 24 hours) and without return to pre-existing conscious level     | Head Injury  |
| 440870   | Subdural hemorrhage following injury with open intracranial wound, with no loss of consciousness                                                                                  | Head Injury  |
| 440236   | Subdural hemorrhage following injury without open intracranial wound AND with brief loss of consciousness                                                                         | Head Injury  |
| 373347   | Subdural hemorrhage following injury without open intracranial wound AND with concussion                                                                                          | Head Injury  |
| 433899   | Subdural hemorrhage following injury without open intracranial wound AND with loss of consciousness                                                                               | Head Injury  |
| 437133   | Subdural hemorrhage following injury without open intracranial wound AND with moderate loss of consciousness                                                                      | Head Injury  |
| 438595   | Subdural hemorrhage following injury without open intracranial wound AND with no loss of consciousness                                                                            | Head Injury  |
| 435391   | Subdural hemorrhage following injury without open intracranial wound AND with prolonged loss of consciousness (more than 24 hours) AND return to pre-existing conscious level     | Head Injury  |
| 438285   | Subdural hemorrhage following injury without open intracranial wound AND with prolonged loss of consciousness (more than 24 hours) without return to pre-existing conscious level | Head Injury  |
| 4017105  | Subdural hemorrhage following open wound of head                                                                                                                                  | Head Injury  |
| 36716584 | Traumatic amputation of part of head                                                                                                                                              | Head Injury  |
| 4132546  | Traumatic brain injury                                                                                                                                                            | Head Injury  |
| 46270764 | Traumatic brain injury of unknown intent                                                                                                                                          | Head Injury  |
| 4132083  | Traumatic brain injury with brief loss of consciousness                                                                                                                           | Head Injury  |
| 4132082  | Traumatic brain injury with loss of consciousness                                                                                                                                 | Head Injury  |
| 42872578 | Traumatic brain injury with loss of consciousness one hour or more                                                                                                                | Head Injury  |
| 4133017  | Traumatic brain injury with moderate loss of consciousness                                                                                                                        | Head Injury  |
| 4133715  | Traumatic brain injury with no loss of consciousness                                                                                                                              | Head Injury  |
| 4133018  | Traumatic brain injury with prolonged loss of consciousness                                                                                                                       | Head Injury  |
| 42872560 | Traumatic brain injury with prolonged loss of consciousness (more than 24 hours) and return to pre-existing conscious level                                                       | Head Injury  |
| 42872561 | Traumatic brain injury with prolonged loss of consciousness (more than 24 hours) without return to pre-existing conscious level                                                   | Head Injury  |
| 4208505  | Traumatic cerebral edema with open intracranial wound                                                                                                                             | Head Injury  |
| 36716580 | Traumatic hemorrhage of cerebral white matter                                                                                                                                     | Head Injury  |
| 40485985 | Traumatic injury of blood vessel of head                                                                                                                                          | Head Injury  |
| 4154699  | Traumatic intracranial subdural hematoma with brief loss of consciousness                                                                                                         | Head Injury  |
| 36716627 | Traumatic intraventricular hemorrhage                                                                                                                                             | Head Injury  |
| 37109288 | Traumatic subarachnoid hemorrhage with loss of consciousness                                                                                                                      | Head Injury  |
| 36716579 | Traumatic subarachnoid hemorrhage without coma                                                                                                                                    | Head Injury  |
| 4201635  | Traumatic subdural hematoma with open intracranial wound                                                                                                                          | Head Injury  |
| 4196275  | Traumatic subdural hematoma without open intracranial wound                                                                                                                       | Head Injury  |
| 4320822  | Vertigo preceded by head injury                                                                                                                                                   | Head Injury  |
| 4335447  | Vestibular trauma                                                                                                                                                                 | Head Injury  |
| 377439   | Visual cortex injury                                                                                                                                                              | Head Injury  |
| 46274044 | Acute ST segment elevation myocardial infarction of lateral wall                                                                                                                  | Heart Attack |
| 46270164 | Acute ST segment elevation myocardial infarction of septum                                                                                                                        | Heart Attack |
| 46270163 | Acute ST segment elevation myocardial infarction due to right coronary artery occlusion                                                                                           | Heart Attack |
| 46270162 | Acute ST segment elevation myocardial infarction due to left coronary artery occlusion                                                                                            | Heart Attack |
| 46270161 | Acute ST segment elevation myocardial infarction of posterior wall                                                                                                                | Heart Attack |
| 46270160 | Acute ST segment elevation myocardial infarction of anteroseptal wall                                                                                                             | Heart Attack |
| 46270159 | Acute ST segment elevation myocardial infarction of anterolateral wall                                                                                                            | Heart Attack |
| 45773170 | Subsequent ST segment elevation myocardial infarction of inferior wall                                                                                                            | Heart Attack |
| 45771322 | Acute myocardial infarction of inferior wall involving right ventricle                                                                                                            | Heart Attack |
| 45766241 | Subsequent non-ST segment elevation myocardial infarction                                                                                                                         | Heart Attack |
| 45766151 | Acute ST segment elevation myocardial infarction of inferior wall involving right ventricle                                                                                       | Heart Attack |
| 45766150 | Acute myocardial infarction of anterior wall involving right ventricle                                                                                                            | Heart Attack |

## SUPPORTING INFORMATION Newby 2022 Metformin versus sulfonylureas on Dementia and Parkinson's risk

|          |                                                                                                     |               |
|----------|-----------------------------------------------------------------------------------------------------|---------------|
| 45766116 | Acute ST segment elevation myocardial infarction of inferior wall                                   | Heart Attack  |
| 45766114 | Subsequent ST segment elevation myocardial infarction                                               | Heart Attack  |
| 45766113 | Subsequent ST segment elevation myocardial infarction of anterior wall                              | Heart Attack  |
| 45766076 | Acute ST segment elevation myocardial infarction of anterior wall involving right ventricle         | Heart Attack  |
| 45766075 | Acute anterior ST segment elevation myocardial infarction                                           | Heart Attack  |
| 44782769 | Acute myocardial infarction due to left coronary artery occlusion                                   | Heart Attack  |
| 44782712 | Acute myocardial infarction due to right coronary artery occlusion                                  | Heart Attack  |
| 43020460 | Acute ST segment elevation myocardial infarction involving left anterior descending coronary artery | Heart Attack  |
| 4329847  | Myocardial infarction                                                                               | Heart Attack  |
| 4324413  | Acute myocardial infarction of posterobasal wall                                                    | Heart Attack  |
| 4323202  | Mixed myocardial ischemia and infarction                                                            | Heart Attack  |
| 4303359  | Acute myocardial infarction of septum                                                               | Heart Attack  |
| 4296653  | Acute ST segment elevation myocardial infarction                                                    | Heart Attack  |
| 4275436  | Acute myocardial infarction of high lateral wall                                                    | Heart Attack  |
| 4270024  | Acute non-ST segment elevation myocardial infarction                                                | Heart Attack  |
| 4267568  | Acute anteroseptal myocardial infarction                                                            | Heart Attack  |
| 4243372  | Acute myocardial infarction of apical-lateral wall                                                  | Heart Attack  |
| 4215259  | First myocardial infarction                                                                         | Heart Attack  |
| 4209541  | Postoperative transmural myocardial infarction of inferior wall                                     | Heart Attack  |
| 4207921  | Postoperative transmural myocardial infarction of anterior wall                                     | Heart Attack  |
| 4206867  | Postoperative subendocardial myocardial infarction                                                  | Heart Attack  |
| 4200113  | Non-Q wave myocardial infarction                                                                    | Heart Attack  |
| 4178129  | Acute anteroapical myocardial infarction                                                            | Heart Attack  |
| 4173632  | Microinfarct of heart                                                                               | Heart Attack  |
| 4170094  | Myocardial infarction in recovery phase                                                             | Heart Attack  |
| 4154704  | Myocardial infarction with complication                                                             | Heart Attack  |
| 4151046  | Acute myocardial infarction of basal-lateral wall                                                   | Heart Attack  |
| 4147223  | Acute myocardial infarction with rupture of ventricle                                               | Heart Attack  |
| 4145721  | Acute non-Q wave infarction                                                                         | Heart Attack  |
| 4126801  | Acute Q wave myocardial infarction                                                                  | Heart Attack  |
| 4124686  | Silent myocardial infarction                                                                        | Heart Attack  |
| 4124685  | Acute non-Q wave infarction - widespread                                                            | Heart Attack  |
| 4121465  | Acute Q wave infarction - inferolateral                                                             | Heart Attack  |
| 4121464  | Acute Q wave infarction - inferior                                                                  | Heart Attack  |
| 4119947  | Acute widespread myocardial infarction                                                              | Heart Attack  |
| 4119946  | Acute non-Q wave infarction - inferolateral                                                         | Heart Attack  |
| 4119945  | Acute non-Q wave infarction - inferior                                                              | Heart Attack  |
| 4119944  | Acute non-Q wave infarction - anterolateral                                                         | Heart Attack  |
| 4119943  | Acute Q wave infarction - anteroseptal                                                              | Heart Attack  |
| 4119457  | Acute Q wave infarction - anterolateral                                                             | Heart Attack  |
| 4108677  | Subsequent myocardial infarction of anterior wall                                                   | Heart Attack  |
| 4108669  | Acute myocardial infarction of atrium                                                               | Heart Attack  |
| 4108218  | Subsequent myocardial infarction of inferior wall                                                   | Heart Attack  |
| 4108217  | Subsequent myocardial infarction                                                                    | Heart Attack  |
| 4051874  | Acute myocardial infarction of posterolateral wall                                                  | Heart Attack  |
| 4030582  | Postoperative myocardial infarction                                                                 | Heart Attack  |
| 765132   | Subendocardial myocardial infarction                                                                | Heart Attack  |
| 444406   | Acute subendocardial infarction                                                                     | Heart Attack  |
| 441579   | Acute myocardial infarction of inferoposterior wall                                                 | Heart Attack  |
| 439693   | True posterior myocardial infarction                                                                | Heart Attack  |
| 438447   | Acute myocardial infarction of inferolateral wall                                                   | Heart Attack  |
| 438438   | Acute myocardial infarction of anterolateral wall                                                   | Heart Attack  |
| 438170   | Acute myocardial infarction of inferior wall                                                        | Heart Attack  |
| 436706   | Acute myocardial infarction of lateral wall                                                         | Heart Attack  |
| 434376   | Acute myocardial infarction of anterior wall                                                        | Heart Attack  |
| 319039   | Acute posterior myocardial infarction                                                               | Heart Attack  |
| 312327   | Acute myocardial infarction                                                                         | Heart Attack  |
| 319835   | Congestive heart failure                                                                            | Heart Failure |
| 316139   | Heart failure                                                                                       | Heart Failure |
| 40479192 | Chronic systolic heart failure                                                                      | Heart Failure |
| 40479576 | Chronic diastolic heart failure                                                                     | Heart Failure |
| 444101   | Hypertensive heart failure                                                                          | Heart Failure |
| 40480602 | Acute on chronic systolic heart failure                                                             | Heart Failure |
| 40481043 | Acute on chronic diastolic heart failure                                                            | Heart Failure |
| 439696   | Hypertensive heart and renal disease with (congestive) heart failure                                | Heart Failure |
| 443587   | Diastolic heart failure                                                                             | Heart Failure |
| 443580   | Systolic heart failure                                                                              | Heart Failure |
| 44782719 | Chronic combined systolic and diastolic heart failure                                               | Heart Failure |
| 40480603 | Acute systolic heart failure                                                                        | Heart Failure |

## SUPPORTING INFORMATION Newby 2022 Metformin versus sulfonylureas on Dementia and Parkinson's risk

|          |                                                                                             |               |
|----------|---------------------------------------------------------------------------------------------|---------------|
| 44782733 | Acute on chronic combined systolic and diastolic heart failure                              | Heart Failure |
| 439846   | Left heart failure                                                                          | Heart Failure |
| 40481042 | Acute diastolic heart failure                                                               | Heart Failure |
| 314378   | Hypertensive heart disease with congestive heart failure                                    | Heart Failure |
| 439698   | Benign hypertensive heart disease with congestive cardiac failure                           | Heart Failure |
| 44782728 | Hypertensive heart AND chronic kidney disease with congestive heart failure                 | Heart Failure |
| 44782718 | Acute combined systolic and diastolic heart failure                                         | Heart Failure |
| 312927   | Acute cor pulmonale                                                                         | Heart Failure |
| 4195892  | Chronic cor pulmonale                                                                       | Heart Failure |
| 439694   | Hypertensive heart and renal disease with both (congestive) heart failure and renal failure | Heart Failure |
| 316994   | Malignant hypertensive heart disease with congestive heart failure                          | Heart Failure |
| 35615055 | Saddle embolus of pulmonary artery with acute cor pulmonale                                 | Heart Failure |
| 4242669  | Biventricular congestive heart failure                                                      | Heart Failure |
| 4264636  | Cardiac insufficiency following cardiac surgery                                             | Heart Failure |
| 4229440  | Chronic congestive heart failure                                                            | Heart Failure |
| 4023479  | Acute congestive heart failure                                                              | Heart Failure |
| 4014159  | Chronic right-sided heart failure                                                           | Heart Failure |
| 4139864  | Congestive heart failure due to left ventricular systolic dysfunction                       | Heart Failure |
| 4307356  | Cor pulmonale                                                                               | Heart Failure |
| 4172864  | Neonatal cardiac failure                                                                    | Heart Failure |
| 4233424  | Acute right-sided heart failure                                                             | Heart Failure |
| 4233224  | Cardiac insufficiency during AND/OR resulting from a procedure                              | Heart Failure |
| 44784442 | Symptomatic congestive heart failure                                                        | Heart Failure |
| 4195785  | Right heart failure secondary to left heart failure                                         | Heart Failure |
| 444031   | Chronic heart failure                                                                       | Heart Failure |
| 4004279  | High output heart failure                                                                   | Heart Failure |
| 4142561  | Congestive heart failure due to valvular disease                                            | Heart Failure |
| 4284562  | Chronic right-sided congestive heart failure                                                | Heart Failure |
| 4206009  | Chronic left-sided congestive heart failure                                                 | Heart Failure |
| 442310   | Acute heart failure                                                                         | Heart Failure |
| 44782713 | Congestive heart failure with right heart failure                                           | Heart Failure |
| 40486933 | Heart failure with normal ejection fraction                                                 | Heart Failure |
| 45766164 | Heart failure with reduced ejection fraction                                                | Heart Failure |
| 40482857 | Cardiorenal syndrome                                                                        | Heart Failure |
| 4273632  | Right ventricular failure                                                                   | Heart Failure |
| 4267800  | Acute left-sided heart failure                                                              | Heart Failure |
| 43021826 | Congestive heart failure stage C                                                            | Heart Failure |
| 4138307  | Right heart failure due to pulmonary hypertension                                           | Heart Failure |
| 4215446  | Acute right-sided congestive heart failure                                                  | Heart Failure |
| 4311437  | Decompensated chronic heart failure                                                         | Heart Failure |
| 4111554  | Decompensated cardiac failure                                                               | Heart Failure |
| 44782655 | Acute exacerbation of chronic congestive heart failure                                      | Heart Failure |
| 4108245  | Acute left ventricular failure                                                              | Heart Failure |
| 4215802  | Cardiac asthma                                                                              | Heart Failure |
| 4327205  | Acute left-sided congestive heart failure                                                   | Heart Failure |
| 4108244  | Compensated cardiac failure                                                                 | Heart Failure |
| 4185565  | Low cardiac output syndrome                                                                 | Heart Failure |
| 4071869  | Congenital cardiac failure                                                                  | Heart Failure |
| 43021842 | Diastolic heart failure stage C                                                             | Heart Failure |
| 44782428 | Congestive heart failure due to cardiomyopathy                                              | Heart Failure |
| 43022068 | Exacerbation of congestive heart failure                                                    | Heart Failure |
| 4193236  | Ayerza's syndrome                                                                           | Heart Failure |
| 4259490  | Cardiorespiratory failure                                                                   | Heart Failure |
| 4199500  | Refractory heart failure                                                                    | Heart Failure |
| 4124705  | Heart failure as a complication of care                                                     | Heart Failure |
| 4009047  | Chronic left-sided heart failure                                                            | Heart Failure |
| 43530642 | Systolic heart failure stage B                                                              | Heart Failure |
| 36712928 | Congestive heart failure stage B due to ischemic cardiomyopathy                             | Heart Failure |
| 43530643 | Diastolic heart failure stage B                                                             | Heart Failure |
| 43021840 | Systolic heart failure stage D                                                              | Heart Failure |
| 36716182 | Acute kidney injury due to circulatory failure                                              | Heart Failure |
| 4177493  | Cardiac insufficiency due to prosthesis                                                     | Heart Failure |
| 4141124  | Postvalvulotomy syndrome                                                                    | Heart Failure |
| 4103448  | Low output heart failure                                                                    | Heart Failure |
| 4079296  | Sepsis-associated right ventricular failure                                                 | Heart Failure |
| 36717359 | Systolic heart failure stage B due to ischemic cardiomyopathy                               | Heart Failure |
| 36712927 | Congestive heart failure stage C due to ischemic cardiomyopathy                             | Heart Failure |
| 36712929 | Systolic heart failure stage C due to ischemic cardiomyopathy                               | Heart Failure |
| 45773075 | Heart failure with reduced ejection fraction due to heart valve disease                     | Heart Failure |
| 45766167 | Heart failure with reduced ejection fraction due to cardiomyopathy                          | Heart Failure |



## SUPPORTING INFORMATION Newby 2022 Metformin versus sulfonylureas on Dementia and Parkinson's risk

|          |                                                                             |                  |
|----------|-----------------------------------------------------------------------------|------------------|
| 45766165 | Heart failure with reduced ejection fraction due to coronary artery disease | Heart Failure    |
| 44784345 | Congestive heart failure as early postoperative complication                | Heart Failure    |
| 43530961 | Induced termination of pregnancy complicated by cardiac failure             | Heart Failure    |
| 43021841 | Diastolic heart failure stage D                                             | Heart Failure    |
| 43021825 | Congestive heart failure stage D                                            | Heart Failure    |
| 43020657 | Heart failure due to end stage congenital heart disease                     | Heart Failure    |
| 43020421 | Systolic heart failure stage C                                              | Heart Failure    |
| 36713488 | Congestive heart failure stage B                                            | Heart Failure    |
| 4079695  | Sepsis-associated left ventricular failure                                  | Heart Failure    |
| 4030258  | Bernheim's syndrome                                                         | Heart Failure    |
| 764872   | Reduced ejection fraction co-occurrent and due to chronic heart failure     | Heart Failure    |
| 762002   | Congestive heart failure as post-operative complication of cardiac surgery  | Heart Failure    |
| 432867   | Hyperlipidemia                                                              | High Cholesterol |
| 437827   | Pure hypercholesterolemia                                                   | High Cholesterol |
| 438720   | Mixed hyperlipidemia                                                        | High Cholesterol |
| 440360   | Pure hyperglyceridemia                                                      | High Cholesterol |
| 437530   | Disorder of lipid metabolism                                                | High Cholesterol |
| 4029305  | Hypercholesterolemia                                                        | High Cholesterol |
| 4134862  | Familial hypercholesterolemia                                               | High Cholesterol |
| 437521   | Familial hyperchylomicronemia                                               | High Cholesterol |
| 4120314  | Hypertriglyceridemia                                                        | High Cholesterol |
| 4029260  | Primary hypertriglyceridemia                                                | High Cholesterol |
| 4047784  | Disorder of cholesterol metabolism                                          | High Cholesterol |
| 4079876  | Familial combined hyperlipidemia                                            | High Cholesterol |
| 4030619  | Mixed hypercholesterolemia and hypertriglyceridemia                         | High Cholesterol |
| 4051221  | Increased lipid                                                             | High Cholesterol |
| 4104485  | Familial multiple lipoprotein-type hyperlipidemia                           | High Cholesterol |
| 4079886  | Hyperalphalipoproteinemia                                                   | High Cholesterol |
| 4142496  | Familial hypertriglyceridemia                                               | High Cholesterol |
| 45770880 | Hyperlipidemia due to type 2 diabetes mellitus                              | High Cholesterol |
| 4220010  | Fredrickson type IIa hyperlipoproteinemia                                   | High Cholesterol |
| 4029261  | Fredrickson type IV hyperlipoproteinemia                                    | High Cholesterol |
| 4031945  | Primary hypercholesterolemia                                                | High Cholesterol |
| 4144529  | Familial type 5 hyperlipoproteinemia                                        | High Cholesterol |
| 4029259  | Familial hypercholesterolemia - heterozygous                                | High Cholesterol |
| 4079885  | Familial hypercholesterolemia - homozygous                                  | High Cholesterol |
| 4029262  | Familial lipoprotein lipase deficiency                                      | High Cholesterol |
| 4170226  | Disorder of lipoprotein AND/OR lipid metabolism                             | High Cholesterol |
| 43531651 | Mixed hyperlipidemia due to type 2 diabetes mellitus                        | High Cholesterol |
| 4031814  | Disorder of lipoprotein storage and metabolism                              | High Cholesterol |
| 45757432 | Hyperlipidemia due to type 1 diabetes mellitus                              | High Cholesterol |
| 4096215  | Hyperlipidemia, group A                                                     | High Cholesterol |
| 4029263  | Primary combined hyperlipidemia                                             | High Cholesterol |
| 4294296  | Chylomicronemia syndrome                                                    | High Cholesterol |
| 4299409  | Sporadic primary hypertriglyceridemia                                       | High Cholesterol |
| 43530660 | Mixed hyperlipidemia due to type 1 diabetes mellitus                        | High Cholesterol |
| 4029892  | Secondary hypertriglyceridemia                                              | High Cholesterol |
| 4292672  | Secondary hyperlipidemia                                                    | High Cholesterol |
| 4143177  | Familial apolipoprotein C-II deficiency                                     | High Cholesterol |
| 4298733  | Primary genetic hyperlipidemia                                              | High Cholesterol |
| 4029880  | Disorder of cholesterol catabolism                                          | High Cholesterol |
| 4029890  | Familial defective apolipoprotein B-100                                     | High Cholesterol |
| 4295609  | Familial hypercholesterolemia due to genetic defect of apolipoprotein B     | High Cholesterol |
| 4298010  | Familial hypercholesterolemia due to homozygous LDL receptor mutation       | High Cholesterol |
| 4029891  | Secondary hypercholesterolemia                                              | High Cholesterol |
| 4268608  | Cholesterol storage disease                                                 | High Cholesterol |
| 4295608  | Familial hypercholesterolemia due to heterozygous LDL receptor mutation     | High Cholesterol |
| 4030586  | Exogenous hyperlipidemia                                                    | High Cholesterol |
| 45757500 | Familial hyperalphalipoproteinemia                                          | High Cholesterol |
| 4079887  | Secondary combined hyperlipidemia                                           | High Cholesterol |
| 4298723  | Hyperlipidemia with lipid deposition in skin                                | High Cholesterol |
| 4291436  | Primary chylomicronemia                                                     | High Cholesterol |
| 4029258  | Polygenic hypercholesterolemia                                              | High Cholesterol |
| 4270878  | Primary "polygenic" combined hyperlipidemia                                 | High Cholesterol |
| 4294297  | Primary genetic mixed hyperlipidemia                                        | High Cholesterol |
| 320128   | Essential hypertension                                                      | Hypertension     |

## SUPPORTING INFORMATION Newby 2022 Metformin versus sulfonylureas on Dementia and Parkinson's risk

|          |                                                                                                                 |              |
|----------|-----------------------------------------------------------------------------------------------------------------|--------------|
| 312648   | Benign essential hypertension                                                                                   | Hypertension |
| 44782429 | Chronic kidney disease due to hypertension                                                                      | Hypertension |
| 316866   | Hypertensive disorder                                                                                           | Hypertension |
| 44784439 | Benign hypertensive renal disease with renal failure                                                            | Hypertension |
| 319034   | Hypertensive heart disease without congestive heart failure                                                     | Hypertension |
| 317898   | Malignant essential hypertension                                                                                | Hypertension |
| 444101   | Hypertensive heart failure                                                                                      | Hypertension |
| 313502   | Benign hypertensive heart disease without congestive heart failure                                              | Hypertension |
| 44782690 | Chronic kidney disease stage 5 due to hypertension                                                              | Hypertension |
| 439696   | Hypertensive heart and renal disease with (congestive) heart failure                                            | Hypertension |
| 443919   | Hypertensive renal failure                                                                                      | Hypertension |
| 4339214  | Secondary pulmonary hypertension                                                                                | Hypertension |
| 193493   | Benign hypertensive renal disease                                                                               | Hypertension |
| 376965   | Hypertensive retinopathy                                                                                        | Hypertension |
| 44783618 | Heritable pulmonary arterial hypertension                                                                       | Hypertension |
| 319826   | Secondary hypertension                                                                                          | Hypertension |
| 4322024  | Pulmonary hypertension                                                                                          | Hypertension |
| 44784621 | Hypertensive heart and chronic kidney disease                                                                   | Hypertension |
| 4028741  | Benign hypertension                                                                                             | Hypertension |
| 4013643  | Pulmonary arterial hypertension                                                                                 | Hypertension |
| 314378   | Hypertensive heart disease with congestive heart failure                                                        | Hypertension |
| 314423   | Benign essential hypertension complicating pregnancy, childbirth and the puerperium - not delivered             | Hypertension |
| 44784638 | Hypertensive heart AND chronic kidney disease stage 5                                                           | Hypertension |
| 40481896 | Hypertensive urgency                                                                                            | Hypertension |
| 321074   | Pre-existing hypertension complicating pregnancy, childbirth and puerperium                                     | Hypertension |
| 439698   | Benign hypertensive heart disease with congestive cardiac failure                                               | Hypertension |
| 321080   | Hypertension complicating pregnancy, childbirth and the puerperium                                              | Hypertension |
| 44782728 | Hypertensive heart AND chronic kidney disease with congestive heart failure                                     | Hypertension |
| 314369   | Malignant hypertensive heart disease without congestive heart failure                                           | Hypertension |
| 4311246  | Pre-existing hypertension in obstetric context                                                                  | Hypertension |
| 317895   | Renovascular hypertension                                                                                       | Hypertension |
| 43021853 | Malignant hypertensive chronic kidney disease stage 1                                                           | Hypertension |
| 43020424 | Hypertensive emergency                                                                                          | Hypertension |
| 312938   | Hypertensive encephalopathy                                                                                     | Hypertension |
| 43020455 | Malignant hypertensive end stage renal disease                                                                  | Hypertension |
| 439694   | Hypertensive heart and renal disease with both (congestive) heart failure and renal failure                     | Hypertension |
| 314103   | Benign essential hypertension complicating pregnancy, childbirth and the puerperium - delivered                 | Hypertension |
| 439695   | Hypertensive heart and renal disease with renal failure                                                         | Hypertension |
| 201313   | Hypertensive renal disease                                                                                      | Hypertension |
| 316994   | Malignant hypertensive heart disease with congestive heart failure                                              | Hypertension |
| 442604   | Hypertensive heart disease                                                                                      | Hypertension |
| 4110948  | Hypertension secondary to endocrine disorder                                                                    | Hypertension |
| 45768449 | Hypertensive crisis                                                                                             | Hypertension |
| 321638   | Benign essential hypertension complicating pregnancy, childbirth and the puerperium                             | Hypertension |
| 4263504  | Benign hypertensive heart disease                                                                               | Hypertension |
| 43021830 | Postoperative hypertension                                                                                      | Hypertension |
| 314958   | Benign secondary hypertension                                                                                   | Hypertension |
| 4249016  | Benign secondary renovascular hypertension                                                                      | Hypertension |
| 4289933  | Malignant hypertension                                                                                          | Hypertension |
| 442626   | Benign hypertensive heart AND renal disease                                                                     | Hypertension |
| 195556   | Hypertensive heart AND renal disease                                                                            | Hypertension |
| 4110947  | Malignant secondary renovascular hypertension                                                                   | Hypertension |
| 4057979  | Pre-existing secondary hypertension complicating pregnancy, childbirth and puerperium                           | Hypertension |
| 4121462  | Persistent pulmonary hypertension of the newborn                                                                | Hypertension |
| 43020910 | Pulmonary hypertension due to left heart disease                                                                | Hypertension |
| 44783628 | Pulmonary hypertension due to lung disease and/or hypoxia                                                       | Hypertension |
| 318437   | Malignant secondary hypertension                                                                                | Hypertension |
| 4062811  | Benign essential hypertension complicating pregnancy, childbirth and the puerperium with postnatal complication | Hypertension |
| 4209293  | Systolic hypertension                                                                                           | Hypertension |
| 443771   | Renal hypertension                                                                                              | Hypertension |
| 44783644 | Labile hypertension due to being in a clinical environment                                                      | Hypertension |
| 4120094  | Chronic thromboembolic pulmonary hypertension                                                                   | Hypertension |
| 44782560 | Idiopathic pulmonary arterial hypertension                                                                      | Hypertension |
| 4071202  | Neonatal hypertension                                                                                           | Hypertension |

## SUPPORTING INFORMATION Newby 2022 Metformin versus sulfonylureas on Dementia and Parkinson's risk

|          |                                                                                                                             |              |
|----------|-----------------------------------------------------------------------------------------------------------------------------|--------------|
| 4062552  | Pre-existing hypertensive heart disease complicating pregnancy, childbirth and the puerperium                               | Hypertension |
| 4167358  | Diastolic hypertension                                                                                                      | Hypertension |
| 4199306  | Transient hypertension                                                                                                      | Hypertension |
| 45757356 | Pre-existing hypertensive chronic kidney disease in mother complicating pregnancy                                           | Hypertension |
| 44783643 | Intermittent hypertension                                                                                                   | Hypertension |
| 4322893  | Hypertensive left ventricular hypertrophy                                                                                   | Hypertension |
| 320456   | Benign essential hypertension complicating pregnancy, childbirth and the puerperium - delivered with postnatal complication | Hypertension |
| 4183981  | Malignant hypertensive heart disease                                                                                        | Hypertension |
| 4159755  | Labile essential hypertension                                                                                               | Hypertension |
| 442766   | Malignant hypertensive renal disease                                                                                        | Hypertension |
| 4061667  | Hypertension induced by oral contraceptive pill                                                                             | Hypertension |
| 442603   | Malignant hypertensive heart AND renal disease                                                                              | Hypertension |
| 40493243 | Eisenmenger's syndrome                                                                                                      | Hypertension |
| 43021748 | Hypertensive nephrosclerosis                                                                                                | Hypertension |
| 4179379  | Exertional hypertension                                                                                                     | Hypertension |
| 43021852 | Malignant hypertensive chronic kidney disease                                                                               | Hypertension |
| 45757756 | Page kidney                                                                                                                 | Hypertension |
| 37018886 | End stage renal disease due to hypertension                                                                                 | Hypertension |
| 4108213  | Hypertension secondary to drug                                                                                              | Hypertension |
| 4173820  | Cardiomegaly - hypertensive                                                                                                 | Hypertension |
| 44782689 | Chronic kidney disease stage 4 due to hypertension                                                                          | Hypertension |
| 44782691 | Chronic kidney disease stage 3 due to hypertension                                                                          | Hypertension |
| 46273636 | Chronic kidney disease stage 3 due to benign hypertension                                                                   | Hypertension |
| 4207534  | Pulmonary hypertensive venous disease                                                                                       | Hypertension |
| 4227607  | Chronic hypertension in obstetric context                                                                                   | Hypertension |
| 44809026 | Stage 1 hypertension                                                                                                        | Hypertension |
| 43021835 | Hypertensive heart AND chronic kidney disease stage 3                                                                       | Hypertension |
| 45757139 | Pre-existing hypertensive heart and chronic kidney disease in mother complicating pregnancy                                 | Hypertension |
| 36712757 | Cardiomyopathy due to hypertension                                                                                          | Hypertension |
| 4217486  | Essential hypertension in obstetric context                                                                                 | Hypertension |
| 4032952  | Renal sclerosis with hypertension                                                                                           | Hypertension |
| 4277110  | Pre-existing hypertension complicating AND/OR reason for care during pregnancy                                              | Hypertension |
| 42709887 | Hypertensive complication                                                                                                   | Hypertension |
| 44782563 | Pulmonary hypertension due to chronic obstructive pulmonary disease                                                         | Hypertension |
| 42873163 | Hypertension complicating pregnancy, childbirth and the puerperium, antepartum                                              | Hypertension |
| 4269358  | Benign essential hypertension in obstetric context                                                                          | Hypertension |
| 4279525  | Hypertension in the obstetric context                                                                                       | Hypertension |
| 4276511  | Labile diastolic hypertension                                                                                               | Hypertension |
| 46270355 | Chronic kidney disease stage 2 due to benign hypertension                                                                   | Hypertension |
| 4302748  | Chronic hypertensive uremia                                                                                                 | Hypertension |
| 4262182  | Hypertension with albuminuria                                                                                               | Hypertension |
| 44784640 | Hypertensive heart AND chronic kidney disease stage 1                                                                       | Hypertension |
| 4034031  | Benign essential hypertension complicating AND/OR reason for care during pregnancy                                          | Hypertension |
| 4057978  | Pre-existing hypertensive heart and renal disease complicating pregnancy, childbirth and the puerperium                     | Hypertension |
| 44784639 | Hypertensive heart AND chronic kidney disease stage 4                                                                       | Hypertension |
| 4049389  | Paroxysmal hypertension                                                                                                     | Hypertension |
| 45757137 | Pre-existing hypertensive heart and chronic kidney disease in mother complicating childbirth                                | Hypertension |
| 44783641 | Pulmonary hypertension due to diastolic systemic ventricular dysfunction                                                    | Hypertension |
| 44783622 | Pulmonary arterial hypertension associated with connective tissue disease                                                   | Hypertension |
| 36713024 | Labile systemic arterial hypertension                                                                                       | Hypertension |
| 4232485  | Pulmonary veno-occlusive disease                                                                                            | Hypertension |
| 44809569 | Stage 2 hypertension                                                                                                        | Hypertension |
| 46270353 | Chronic kidney disease due to benign hypertension                                                                           | Hypertension |
| 4180283  | Systolic essential hypertension                                                                                             | Hypertension |
| 45771064 | Hypertension in chronic kidney disease due to type 2 diabetes mellitus                                                      | Hypertension |
| 4305599  | Renal arterial hypertension                                                                                                 | Hypertension |
| 43020456 | Malignant hypertensive chronic kidney disease stage 3                                                                       | Hypertension |
| 4268756  | Benign arteriolar nephrosclerosis                                                                                           | Hypertension |
| 4058987  | High-renin essential hypertension                                                                                           | Hypertension |

## SUPPORTING INFORMATION Newby 2022 Metformin versus sulfonylureas on Dementia and Parkinson's risk

|          |                                                                                                        |              |
|----------|--------------------------------------------------------------------------------------------------------|--------------|
| 44783629 | Pulmonary hypertension due to interstitial lung disease                                                | Hypertension |
| 4146816  | Pre-existing hypertension complicating AND/OR reason for care during childbirth                        | Hypertension |
| 4322735  | Hypertension associated with transplantation                                                           | Hypertension |
| 40482858 | Pulmonary arterial hypertension associated with portal hypertension                                    | Hypertension |
| 43021836 | Hypertensive heart AND chronic kidney disease stage 2                                                  | Hypertension |
| 44783624 | Pulmonary arterial hypertension associated with congenital heart disease                               | Hypertension |
| 4216685  | Malignant arteriolar nephrosclerosis                                                                   | Hypertension |
| 44809027 | Severe hypertension                                                                                    | Hypertension |
| 44782692 | Chronic kidney disease stage 2 due to hypertension                                                     | Hypertension |
| 45757447 | Hypertension in chronic kidney disease stage 2 due to type 2 diabetes mellitus                         | Hypertension |
| 43020457 | Malignant hypertensive chronic kidney disease stage 4                                                  | Hypertension |
| 4178312  | Hypertension secondary to kidney transplant                                                            | Hypertension |
| 45757446 | Hypertension in chronic kidney disease stage 3 due to type 2 diabetes mellitus                         | Hypertension |
| 4263067  | Low-renin essential hypertension                                                                       | Hypertension |
| 4240080  | Hypertensive renal disease complicating AND/OR reason for care during puerperium                       | Hypertension |
| 42538697 | Diastolic hypertension and systolic hypertension                                                       | Hypertension |
| 44783636 | Pulmonary hypertension in systemic disorder                                                            | Hypertension |
| 46273514 | Chronic kidney disease stage 4 due to benign hypertension                                              | Hypertension |
| 44783631 | Pulmonary hypertension due to sleep-disordered breathing                                               | Hypertension |
| 4235804  | Pulmonary hypertension secondary to raised pulmonary vascular resistance                               | Hypertension |
| 4302591  | Essential hypertension complicating AND/OR reason for care during pregnancy                            | Hypertension |
| 4219323  | Hypertension secondary to renal disease complicating AND/OR reason for care during puerperium          | Hypertension |
| 4135463  | Cardiovascular renal disease                                                                           | Hypertension |
| 44783637 | Pulmonary hypertension in sarcoidosis                                                                  | Hypertension |
| 44782566 | Pulmonary hypertension due to left-sided valvular heart disease                                        | Hypertension |
| 45757445 | Hypertension in chronic kidney disease stage 4 due to type 2 diabetes mellitus                         | Hypertension |
| 37016726 | Supine hypertension                                                                                    | Hypertension |
| 45772751 | Hypertension concurrent and due to end stage renal disease on dialysis                                 | Hypertension |
| 46273164 | End stage renal disease due to benign hypertension                                                     | Hypertension |
| 46270356 | Chronic kidney disease stage 5 due to benign hypertension                                              | Hypertension |
| 45771067 | Hypertension in chronic kidney disease due to type 1 diabetes mellitus                                 | Hypertension |
| 45757444 | Hypertension in chronic kidney disease stage 5 due to type 2 diabetes mellitus                         | Hypertension |
| 45757392 | Hypertension concurrent and due to end stage renal disease on dialysis due to type 2 diabetes mellitus | Hypertension |
| 44784637 | Hypertensive heart AND chronic kidney disease on dialysis                                              | Hypertension |
| 44783640 | Pulmonary hypertension due to systolic systemic ventricular dysfunction                                | Hypertension |
| 44783633 | Pulmonary hypertension due to developmental abnormality of the lung                                    | Hypertension |
| 44783630 | Pulmonary hypertension due to pulmonary disease with mixed restrictive and obstructive pattern         | Hypertension |
| 44783623 | Pulmonary arterial hypertension associated with HIV infection                                          | Hypertension |
| 44783621 | Associated pulmonary arterial hypertension                                                             | Hypertension |
| 43021854 | Malignant hypertensive chronic kidney disease stage 2                                                  | Hypertension |
| 43020437 | Malignant hypertensive chronic kidney disease stage 5                                                  | Hypertension |
| 4337510  | Episodic pulmonary hypertension                                                                        | Hypertension |
| 4321603  | Essential hypertension complicating AND/OR reason for care during puerperium                           | Hypertension |
| 4304837  | Chronic hypertension complicating AND/OR reason for care during childbirth                             | Hypertension |
| 4289142  | Eclampsia added to pre-existing hypertension                                                           | Hypertension |
| 4280382  | Hypertensive renal disease complicating AND/OR reason for care during pregnancy                        | Hypertension |
| 4253928  | Secondary diastolic hypertension                                                                       | Hypertension |
| 4242878  | Sustained diastolic hypertension                                                                       | Hypertension |
| 4221991  | Rebound hypertension                                                                                   | Hypertension |
| 4215640  | Benign essential hypertension complicating AND/OR reason for care during childbirth                    | Hypertension |
| 4193900  | Hypertensive heart disease in obstetric context                                                        | Hypertension |
| 4174979  | Hypertension secondary to renal disease complicating AND/OR reason for care during pregnancy           | Hypertension |

## SUPPORTING INFORMATION Newby 2022 Metformin versus sulfonylureas on Dementia and Parkinson's risk

|          |                                                                                                        |                              |
|----------|--------------------------------------------------------------------------------------------------------|------------------------------|
| 4169889  | Hypertensive renal disease complicating AND/OR reason for care during childbirth                       | Hypertension                 |
| 4151903  | Pre-existing hypertension complicating AND/OR reason for care during puerperium                        | Hypertension                 |
| 4148205  | Benign essential hypertension complicating AND/OR reason for care during puerperium                    | Hypertension                 |
| 4124833  | Pulmonary hypertension due to chronic exposure to high altitude                                        | Hypertension                 |
| 4124831  | Sporadic primary pulmonary hypertension                                                                | Hypertension                 |
| 4121621  | Pulmonary capillary hemangiomatosis                                                                    | Hypertension                 |
| 4121620  | Pulmonary arterial hypertension induced by drug                                                        | Hypertension                 |
| 4120092  | Solitary pulmonary hypertension                                                                        | Hypertension                 |
| 4119611  | Familial primary pulmonary hypertension                                                                | Hypertension                 |
| 4094374  | Hypertension secondary to renal disease complicating AND/OR reason for care during childbirth          | Hypertension                 |
| 4033160  | Progressive pulmonary hypertension                                                                     | Hypertension                 |
| 4032790  | Hypertensive heart AND renal disease complicating AND/OR reason for care during childbirth             | Hypertension                 |
| 4006325  | Hypertension secondary to renal disease in obstetric context                                           | Hypertension                 |
| 762973   | Hypertensive end stage renal disease                                                                   | Hypertension                 |
| 4048212  | Goldblatt hypertension                                                                                 | Hypertension                 |
| 44809548 | Hypertension resistant to drug therapy                                                                 | Hypertension                 |
| 44811932 | Stage 1 hypertension (NICE 2011) without evidence of end organ damage                                  | Hypertension                 |
| 46270354 | Chronic kidney disease stage 1 due to benign hypertension                                              | Hypertension                 |
| 45757787 | Postpartum pre-existing essential hypertension                                                         | Hypertension                 |
| 45757393 | Hypertension concurrent and due to end stage renal disease on dialysis due to type 1 diabetes mellitus | Hypertension                 |
| 45757140 | Pre-existing hypertensive heart disease in mother complicating pregnancy                               | Hypertension                 |
| 44811933 | Stage 1 hypertension (NICE 2011) with evidence of end organ damage                                     | Hypertension                 |
| 44783639 | Pulmonary hypertension in neurofibromatosis                                                            | Hypertension                 |
| 44783638 | Pulmonary hypertension in lymphangioleiomyomatosis                                                     | Hypertension                 |
| 44783632 | Pulmonary hypertension due to alveolar hypoventilation disorder                                        | Hypertension                 |
| 44783626 | Pulmonary arterial hypertension associated with chronic hemolytic anemia                               | Hypertension                 |
| 44783619 | Heritable pulmonary arterial hypertension due to BMPR2 mutation                                        | Hypertension                 |
| 44782717 | End stage renal disease on dialysis due to hypertension                                                | Hypertension                 |
| 44782703 | Chronic kidney disease stage 1 due to hypertension                                                     | Hypertension                 |
| 44782565 | Pulmonary hypertension in Langerhans cell histiocytosis                                                | Hypertension                 |
| 44782564 | Pulmonary hypertension due to hematological disorder                                                   | Hypertension                 |
| 43021864 | Malignant hypertensive end stage renal disease on dialysis                                             | Hypertension                 |
| 4233689  | Postcapillary pulmonary hypertension                                                                   | Hypertension                 |
| 4228419  | Hypertensive optic neuropathy                                                                          | Hypertension                 |
| 4227517  | Hypertensive choroidopathy                                                                             | Hypertension                 |
| 4218784  | Hypertensive renal disease in obstetric context                                                        | Hypertension                 |
| 4212496  | Parenchymal renal hypertension                                                                         | Hypertension                 |
| 4162306  | Malignant hypertension complicating AND/OR reason for care during pregnancy                            | Hypertension                 |
| 4124832  | Pulmonary hypertension associated with chronic underventilation                                        | Hypertension                 |
| 4120093  | Large vessel pulmonary hypertension                                                                    | Hypertension                 |
| 4083723  | Essential hypertension complicating AND/OR reason for care during childbirth                           | Hypertension                 |
| 4081040  | Facultative pulmonary hypertension with shunt at atrial level                                          | Hypertension                 |
| 4081039  | Pulmonary hypertension with occult mitral stenosis                                                     | Hypertension                 |
| 4081038  | Pulmonary hypertension with extreme obesity                                                            | Hypertension                 |
| 4049377  | Hypertensive heart disease complicating AND/OR reason for care during pregnancy                        | Hypertension                 |
| 765536   | Benign hypertensive heart disease and chronic renal disease stage 4                                    | Hypertension                 |
| 764011   | Benign hypertensive heart disease and chronic renal disease                                            | Hypertension                 |
| 762001   | Benign hypertensive heart disease and chronic renal disease stage 3                                    | Hypertension                 |
| 760850   | Benign hypertensive heart disease and chronic renal disease stage 5                                    | Hypertension                 |
| 762060   | Chronic mood disorder                                                                                  | Major psychiatric conditions |
| 4243822  | Severe major depression with psychotic features, mood-incongruent                                      | Major psychiatric conditions |
| 36715000 | Minimal major depression                                                                               | Major psychiatric conditions |
| 4031928  | Severe mixed bipolar I disorder with psychotic features, mood-incongruent                              | Major psychiatric conditions |
| 37109052 | Mild major depressive disorder co-occurrent with anxiety single episode                                | Major psychiatric conditions |
| 37109053 | Moderate major depressive disorder co-occurrent with anxiety single episode                            | Major psychiatric conditions |

## SUPPORTING INFORMATION Newby 2022 Metformin versus sulfonylureas on Dementia and Parkinson's risk

|          |                                                                                                          |                              |
|----------|----------------------------------------------------------------------------------------------------------|------------------------------|
| 37109054 | Severe major depressive disorder co-occurrent with anxiety single episode                                | Major psychiatric conditions |
| 4312736  | Severe bipolar I disorder, single manic episode with psychotic features, mood-incongruent                | Major psychiatric conditions |
| 4085662  | Schizophrenic prodrome                                                                                   | Major psychiatric conditions |
| 4141603  | Severe manic bipolar I disorder with psychotic features, mood-incongruent                                | Major psychiatric conditions |
| 4251178  | Bipolar I disorder, most recent episode mixed with catatonic features                                    | Major psychiatric conditions |
| 4043918  | Cluster A personality disorder                                                                           | Major psychiatric conditions |
| 4310121  | Subchronic undifferentiated schizophrenia                                                                | Major psychiatric conditions |
| 4147991  | Severe bipolar II disorder, most recent episode major depressive with psychotic features                 | Major psychiatric conditions |
| 4131027  | Severe bipolar disorder with psychotic features, mood-incongruent                                        | Major psychiatric conditions |
| 4184004  | Schizophreniform disorder without good prognostic features                                               | Major psychiatric conditions |
| 4182998  | Severe depressed bipolar I disorder with psychotic features, mood-congruent                              | Major psychiatric conditions |
| 4181807  | Major depressive disorder, single episode with atypical features                                         | Major psychiatric conditions |
| 4217940  | Severe bipolar II disorder, most recent episode major depressive without psychotic features              | Major psychiatric conditions |
| 4219539  | Late onset schizophrenia                                                                                 | Major psychiatric conditions |
| 4263364  | Schizophreniform disorder with good prognostic features                                                  | Major psychiatric conditions |
| 4276670  | Severe mixed bipolar I disorder with psychotic features, mood-congruent                                  | Major psychiatric conditions |
| 4107538  | Bipolar I disorder, most recent episode depressed with atypical features                                 | Major psychiatric conditions |
| 4073401  | Bipolar I disorder, most recent episode manic with catatonic features                                    | Major psychiatric conditions |
| 4071442  | Bipolar I disorder, most recent episode depressed with catatonic features                                | Major psychiatric conditions |
| 4067409  | Severe major depression, single episode, with psychotic features, mood-incongruent                       | Major psychiatric conditions |
| 4330846  | Bipolar II disorder, most recent episode major depressive with catatonic features                        | Major psychiatric conditions |
| 4333670  | Organic bipolar disorder                                                                                 | Major psychiatric conditions |
| 4338812  | Bipolar I disorder, single manic episode with catatonic features                                         | Major psychiatric conditions |
| 36714997 | Minimal recurrent major depression                                                                       | Major psychiatric conditions |
| 36717389 | Moderately severe major depression single episode                                                        | Major psychiatric conditions |
| 4000165  | Severe bipolar II disorder, most recent episode major depressive with psychotic features, mood-congruent | Major psychiatric conditions |
| 43020483 | Reactive depressive psychosis, single episode                                                            | Major psychiatric conditions |
| 4192865  | Bipolar I disorder, most recent episode depressed with melancholic features                              | Major psychiatric conditions |
| 4102660  | Cenesthopathic schizophrenia                                                                             | Major psychiatric conditions |
| 4200385  | Severe bipolar disorder without psychotic features                                                       | Major psychiatric conditions |
| 43020451 | Severe manic bipolar I disorder                                                                          | Major psychiatric conditions |
| 4144519  | Bipolar II disorder, most recent episode major depressive with melancholic features                      | Major psychiatric conditions |
| 4161200  | Severe bipolar II disorder                                                                               | Major psychiatric conditions |
| 4185096  | Bipolar II disorder, most recent episode major depressive with atypical features                         | Major psychiatric conditions |
| 4155798  | Severe bipolar disorder                                                                                  | Major psychiatric conditions |
| 4001733  | Chronic bipolar II disorder, most recent episode major depressive                                        | Major psychiatric conditions |
| 4299785  | Severe major depression, single episode, with psychotic features, mood-congruent                         | Major psychiatric conditions |
| 438129   | Severe manic bipolar I disorder with psychotic features, mood-congruent                                  | Major psychiatric conditions |
| 4197669  | Chronic bipolar I disorder, most recent episode depressed                                                | Major psychiatric conditions |
| 4034842  | Severe recurrent major depression with psychotic features, mood-incongruent                              | Major psychiatric conditions |
| 4144233  | Severe major depression with psychotic features, mood-congruent                                          | Major psychiatric conditions |
| 4324945  | Mild bipolar II disorder, most recent episode major depressive                                           | Major psychiatric conditions |
| 37111697 | Major depression with psychotic features                                                                 | Major psychiatric conditions |
| 4322477  | Severe bipolar disorder with psychotic features, mood-congruent                                          | Major psychiatric conditions |
| 43021847 | Rapid cycling bipolar I disorder                                                                         | Major psychiatric conditions |
| 4262111  | Moderate bipolar II disorder, most recent episode major depressive                                       | Major psychiatric conditions |
| 4194222  | Moderate bipolar disorder                                                                                | Major psychiatric conditions |
| 4168389  | Borderline schizophrenia                                                                                 | Major psychiatric conditions |
| 4154283  | Severe bipolar I disorder                                                                                | Major psychiatric conditions |
| 4141292  | Severe recurrent major depression with psychotic features, mood-congruent                                | Major psychiatric conditions |
| 4154391  | Major depression, melancholic type                                                                       | Major psychiatric conditions |
| 36714998 | Moderately severe recurrent major depression                                                             | Major psychiatric conditions |
| 4270907  | Major depressive disorder, single episode with melancholic features                                      | Major psychiatric conditions |

## SUPPORTING INFORMATION Newby 2022 Metformin versus sulfonylureas on Dementia and Parkinson's risk

|          |                                                                                  |                              |
|----------|----------------------------------------------------------------------------------|------------------------------|
| 4172156  | Bipolar II disorder, most recent episode hypomanic                               | Major psychiatric conditions |
| 4287238  | Major depressive disorder, single episode with catatonic features                | Major psychiatric conditions |
| 440079   | Mild mixed bipolar I disorder                                                    | Major psychiatric conditions |
| 4195158  | Severe bipolar disorder with psychotic features                                  | Major psychiatric conditions |
| 4031328  | Chronic major depressive disorder, single episode                                | Major psychiatric conditions |
| 42872412 | Severe mixed bipolar I disorder                                                  | Major psychiatric conditions |
| 4028027  | Mild bipolar disorder                                                            | Major psychiatric conditions |
| 4134596  | Chronic mental disorder                                                          | Major psychiatric conditions |
| 439259   | Single major depressive episode, severe, with psychosis                          | Major psychiatric conditions |
| 4215917  | Mild manic bipolar I disorder                                                    | Major psychiatric conditions |
| 4132144  | Severe mood disorder with psychotic features                                     | Major psychiatric conditions |
| 4102603  | Severe manic bipolar I disorder with psychotic features                          | Major psychiatric conditions |
| 4220023  | Recurrent major depressive disorder with catatonic features                      | Major psychiatric conditions |
| 439001   | Severe mixed bipolar I disorder with psychotic features                          | Major psychiatric conditions |
| 36714389 | Moderately severe major depression                                               | Major psychiatric conditions |
| 432864   | Acute schizophrenic episode                                                      | Major psychiatric conditions |
| 37016741 | Acute polymorphic psychotic disorder co-occurrent with symptoms of schizophrenia | Major psychiatric conditions |
| 4304140  | Recurrent major depressive disorder with atypical features                       | Major psychiatric conditions |
| 42872413 | Severe depressed bipolar I disorder                                              | Major psychiatric conditions |
| 4307804  | Moderate manic bipolar I disorder                                                | Major psychiatric conditions |
| 437250   | Mild depressed bipolar I disorder                                                | Major psychiatric conditions |
| 4287544  | Manic bipolar I disorder                                                         | Major psychiatric conditions |
| 440077   | Subchronic latent schizophrenia                                                  | Major psychiatric conditions |
| 37016719 | Acute polymorphic psychotic disorder without symptoms of schizophrenia           | Major psychiatric conditions |
| 439785   | Moderate mixed bipolar I disorder                                                | Major psychiatric conditions |
| 4037669  | Bipolar II disorder, most recent episode major depressive                        | Major psychiatric conditions |
| 433990   | Subchronic catatonic schizophrenia                                               | Major psychiatric conditions |
| 42872411 | Severe major depression, single episode                                          | Major psychiatric conditions |
| 435782   | Chronic schizophrenia                                                            | Major psychiatric conditions |
| 436384   | Subchronic disorganized schizophrenia with acute exacerbations                   | Major psychiatric conditions |
| 439275   | Acute exacerbation of subchronic catatonic schizophrenia                         | Major psychiatric conditions |
| 438724   | Subchronic disorganized schizophrenia                                            | Major psychiatric conditions |
| 4205471  | Recurrent major depressive disorder with melancholic features                    | Major psychiatric conditions |
| 433442   | Subchronic residual schizophrenia                                                | Major psychiatric conditions |
| 433734   | Acute exacerbation of chronic latent schizophrenia                               | Major psychiatric conditions |
| 439274   | Acute exacerbation of subchronic latent schizophrenia                            | Major psychiatric conditions |
| 444396   | Subchronic residual schizophrenia with acute exacerbations                       | Major psychiatric conditions |
| 4154309  | Severe recurrent major depression with psychotic features                        | Major psychiatric conditions |
| 439250   | Mixed bipolar affective disorder                                                 | Major psychiatric conditions |
| 762600   | Assessment for bipolar disorder                                                  | Major psychiatric conditions |
| 4280361  | Moderate depressed bipolar I disorder                                            | Major psychiatric conditions |
| 434318   | Paraphrenia                                                                      | Major psychiatric conditions |
| 42872722 | Severe major depression                                                          | Major psychiatric conditions |
| 4321694  | Subchronic undifferentiated schizophrenia with acute exacerbations               | Major psychiatric conditions |
| 436071   | Acute exacerbation of chronic catatonic schizophrenia                            | Major psychiatric conditions |
| 4133495  | Acute schizophrenia-like psychotic disorder                                      | Major psychiatric conditions |
| 441538   | Chronic catatonic schizophrenia                                                  | Major psychiatric conditions |
| 435235   | Chronic latent schizophrenia                                                     | Major psychiatric conditions |
| 43531624 | Severe recurrent major depression                                                | Major psychiatric conditions |
| 4194671  | Chronic undifferentiated schizophrenia with acute exacerbations                  | Major psychiatric conditions |
| 436385   | Chronic disorganized schizophrenia with acute exacerbation                       | Major psychiatric conditions |
| 440373   | Subchronic schizophrenia                                                         | Major psychiatric conditions |
| 432598   | Subchronic schizophrenia with acute exacerbations                                | Major psychiatric conditions |
| 440684   | Simple paranoid state                                                            | Major psychiatric conditions |
| 373176   | Organic mood disorder                                                            | Major psychiatric conditions |
| 4103574  | Chronic depression                                                               | Major psychiatric conditions |
| 4250023  | Severe major depression with psychotic features                                  | Major psychiatric conditions |
| 4094358  | Chronic recurrent major depressive disorder                                      | Major psychiatric conditions |
| 440368   | Chronic disorganized schizophrenia                                               | Major psychiatric conditions |
| 433742   | Latent schizophrenia                                                             | Major psychiatric conditions |
| 432299   | Subchronic paranoid schizophrenia                                                | Major psychiatric conditions |
| 435218   | Chronic residual schizophrenia with acute exacerbations                          | Major psychiatric conditions |
| 432597   | Schizoaffective schizophrenia                                                    | Major psychiatric conditions |
| 441836   | Depressed bipolar I disorder                                                     | Major psychiatric conditions |
| 434901   | Acute exacerbation of subchronic paranoid schizophrenia                          | Major psychiatric conditions |
| 4030856  | Severe bipolar I disorder, single manic episode without psychotic features       | Major psychiatric conditions |
| 432290   | Mild bipolar I disorder, single manic episode                                    | Major psychiatric conditions |
| 432865   | Acute exacerbation of subchronic schizoaffective schizophrenia                   | Major psychiatric conditions |
| 440067   | Moderate bipolar I disorder, single manic episode                                | Major psychiatric conditions |

## SUPPORTING INFORMATION Newby 2022 Metformin versus sulfonylureas on Dementia and Parkinson's risk

|          |                                                                                    |                              |
|----------|------------------------------------------------------------------------------------|------------------------------|
| 433443   | Subchronic schizoaffective schizophrenia                                           | Major psychiatric conditions |
| 4220617  | Severe bipolar I disorder, single manic episode with psychotic features            | Major psychiatric conditions |
| 4100366  | Acute exacerbation of chronic schizophrenia                                        | Major psychiatric conditions |
| 436086   | Manic bipolar I disorder in full remission                                         | Major psychiatric conditions |
| 4336957  | Mild major depression                                                              | Major psychiatric conditions |
| 434010   | Schizotypal personality disorder                                                   | Major psychiatric conditions |
| 443906   | Mixed bipolar I disorder                                                           | Major psychiatric conditions |
| 435520   | Reactive depressive psychosis                                                      | Major psychiatric conditions |
| 4152280  | Major depressive disorder                                                          | Major psychiatric conditions |
| 436673   | Chronic residual schizophrenia                                                     | Major psychiatric conditions |
| 440691   | Paranoid personality disorder                                                      | Major psychiatric conditions |
| 4327337  | Severe major depression without psychotic features                                 | Major psychiatric conditions |
| 433996   | Catatonic schizophrenia                                                            | Major psychiatric conditions |
| 4100365  | Schizophrenic disorders                                                            | Major psychiatric conditions |
| 438727   | Atypical depressive disorder                                                       | Major psychiatric conditions |
| 4177651  | Depressed bipolar I disorder in partial remission                                  | Major psychiatric conditions |
| 4307111  | Moderate major depression                                                          | Major psychiatric conditions |
| 444434   | Schizophreniform disorder                                                          | Major psychiatric conditions |
| 4105330  | Chronic undifferentiated schizophrenia                                             | Major psychiatric conditions |
| 439249   | Mixed bipolar affective disorder, mild                                             | Major psychiatric conditions |
| 441834   | Bipolar affective disorder, currently manic, mild                                  | Major psychiatric conditions |
| 435236   | Acute exacerbation of chronic schizoaffective schizophrenia                        | Major psychiatric conditions |
| 436067   | Simple schizophrenia                                                               | Major psychiatric conditions |
| 437243   | Acute exacerbation of chronic paranoid schizophrenia                               | Major psychiatric conditions |
| 4150985  | Bipolar I disorder, most recent episode hypomanic                                  | Major psychiatric conditions |
| 439004   | Residual schizophrenia                                                             | Major psychiatric conditions |
| 441835   | Chronic schizoaffective schizophrenia                                              | Major psychiatric conditions |
| 441828   | Disorganized schizophrenia                                                         | Major psychiatric conditions |
| 4008566  | Undifferentiated schizophrenia                                                     | Major psychiatric conditions |
| 4025677  | Single episode of major depression in full remission                               | Major psychiatric conditions |
| 443797   | Severe manic bipolar I disorder without psychotic features                         | Major psychiatric conditions |
| 436386   | Severe depressed bipolar I disorder with psychotic features                        | Major psychiatric conditions |
| 35622934 | Psychosis and severe depression co-occurrent and due to bipolar affective disorder | Major psychiatric conditions |
| 436944   | Chronic paranoid schizophrenia                                                     | Major psychiatric conditions |
| 439253   | Bipolar affective disorder, currently depressed, mild                              | Major psychiatric conditions |
| 433992   | Bipolar affective disorder, currently manic, moderate                              | Major psychiatric conditions |
| 432866   | Bipolar I disorder, single manic episode                                           | Major psychiatric conditions |
| 372599   | Severe mixed bipolar I disorder without psychotic features                         | Major psychiatric conditions |
| 439246   | Mixed bipolar affective disorder, severe, with psychosis                           | Major psychiatric conditions |
| 442570   | Severe depressed bipolar I disorder without psychotic features                     | Major psychiatric conditions |
| 438406   | Severe major depression, single episode, with psychotic features                   | Major psychiatric conditions |
| 439248   | Mixed bipolar affective disorder, moderate                                         | Major psychiatric conditions |
| 432590   | Delusional disorder                                                                | Major psychiatric conditions |
| 439256   | Bipolar affective disorder, currently manic, severe, with psychosis                | Major psychiatric conditions |
| 440078   | Bipolar affective disorder, current episode manic                                  | Major psychiatric conditions |
| 435226   | Bipolar affective disorder, current episode mixed                                  | Major psychiatric conditions |
| 4141454  | Recurrent major depression in partial remission                                    | Major psychiatric conditions |
| 437528   | Bipolar affective disorder, currently depressed, moderate                          | Major psychiatric conditions |
| 438998   | Recurrent major depressive episodes, mild                                          | Major psychiatric conditions |
| 432876   | Bipolar I disorder                                                                 | Major psychiatric conditions |
| 4307956  | Bipolar II disorder                                                                | Major psychiatric conditions |
| 4244078  | Schizoaffective disorder, bipolar type                                             | Major psychiatric conditions |
| 439254   | Bipolar affective disorder, current episode depression                             | Major psychiatric conditions |
| 434911   | Recurrent major depressive episodes, severe, with psychosis                        | Major psychiatric conditions |
| 441534   | Severe major depression, single episode, without psychotic features                | Major psychiatric conditions |
| 4228802  | Mild recurrent major depression                                                    | Major psychiatric conditions |
| 433450   | Paranoid schizophrenia                                                             | Major psychiatric conditions |
| 4195572  | Mild major depression, single episode                                              | Major psychiatric conditions |
| 4049623  | Moderate major depression, single episode                                          | Major psychiatric conditions |
| 436073   | Psychotic disorder                                                                 | Major psychiatric conditions |
| 4286201  | Schizoaffective disorder                                                           | Major psychiatric conditions |
| 435783   | Schizophrenia                                                                      | Major psychiatric conditions |
| 4282316  | Recurrent major depression                                                         | Major psychiatric conditions |
| 432883   | Recurrent major depressive episodes, moderate                                      | Major psychiatric conditions |
| 432285   | Recurrent major depressive episodes                                                | Major psychiatric conditions |
| 435220   | Severe recurrent major depression without psychotic features                       | Major psychiatric conditions |
| 436665   | Bipolar disorder                                                                   | Major psychiatric conditions |
| 4077577  | Moderate recurrent major depression                                                | Major psychiatric conditions |
| 4282096  | Major depression, single episode                                                   | Major psychiatric conditions |
| 440383   | Depressive disorder                                                                | Major psychiatric conditions |



## SUPPORTING INFORMATION Newby 2022 Metformin versus sulfonylureas on Dementia and Parkinson's risk

|          |                                                                                                            |                                      |
|----------|------------------------------------------------------------------------------------------------------------|--------------------------------------|
| 312934   | Atherosclerosis of aorta                                                                                   | Peripheral arterial/vascular disease |
| 315558   | Atherosclerosis of arteries of the extremities                                                             | Peripheral arterial/vascular disease |
| 40484167 | Arteriosclerosis of artery of extremity                                                                    | Peripheral arterial/vascular disease |
| 44782819 | Chronic occlusion of artery of extremity                                                                   | Peripheral arterial/vascular disease |
| 321052   | Peripheral vascular disease                                                                                | Peripheral arterial/vascular disease |
| 4189293  | Vascular disorder of lower extremity                                                                       | Peripheral arterial/vascular disease |
| 441044   | Atheromatous embolus of lower limb                                                                         | Peripheral arterial/vascular disease |
| 40479625 | Atherosclerosis of artery                                                                                  | Peripheral arterial/vascular disease |
| 317309   | Peripheral arterial occlusive disease                                                                      | Peripheral arterial/vascular disease |
| 443454   | Cerebral infarction                                                                                        | Stroke/Transient ischaemic attack    |
| 4110192  | Cerebral infarction due to thrombosis of cerebral arteries                                                 | Stroke/Transient ischaemic attack    |
| 376713   | Cerebral hemorrhage                                                                                        | Stroke/Transient ischaemic attack    |
| 43530727 | Spontaneous cerebral hemorrhage                                                                            | Stroke/Transient ischaemic attack    |
| 4108356  | Cerebral infarction due to embolism of cerebral arteries                                                   | Stroke/Transient ischaemic attack    |
| 439040   | Subdural hemorrhage                                                                                        | Stroke/Transient ischaemic attack    |
| 432923   | Subarachnoid hemorrhage                                                                                    | Stroke/Transient ischaemic attack    |
| 4017107  | Traumatic subdural hemorrhage                                                                              | Stroke/Transient ischaemic attack    |
| 4043731  | Infarction - precerebral                                                                                   | Stroke/Transient ischaemic attack    |
| 4111709  | Non-traumatic subdural hemorrhage                                                                          | Stroke/Transient ischaemic attack    |
| 4148906  | Spontaneous subarachnoid hemorrhage                                                                        | Stroke/Transient ischaemic attack    |
| 372924   | Cerebral artery occlusion                                                                                  | Stroke/Transient ischaemic attack    |
| 439847   | Intracranial hemorrhage                                                                                    | Stroke/Transient ischaemic attack    |
| 4134162  | Subarachnoid hemorrhage due to traumatic injury                                                            | Stroke/Transient ischaemic attack    |
| 4014781  | Closed traumatic subdural hemorrhage                                                                       | Stroke/Transient ischaemic attack    |
| 45772786 | Cerebral infarction due to embolism of middle cerebral artery                                              | Stroke/Transient ischaemic attack    |
| 42873157 | Intracranial hemorrhage following injury                                                                   | Stroke/Transient ischaemic attack    |
| 435959   | Subarachnoid hemorrhage following injury without open intracranial wound                                   | Stroke/Transient ischaemic attack    |
| 438595   | Subdural hemorrhage following injury without open intracranial wound AND with no loss of consciousness     | Stroke/Transient ischaemic attack    |
| 4110189  | Cerebral infarct due to thrombosis of precerebral arteries                                                 | Stroke/Transient ischaemic attack    |
| 45767658 | Cerebral infarction due to thrombosis of middle cerebral artery                                            | Stroke/Transient ischaemic attack    |
| 4144154  | Non-traumatic intracerebral ventricular hemorrhage                                                         | Stroke/Transient ischaemic attack    |
| 4048277  | Intraventricular (nontraumatic) hemorrhage, grade 1, of fetus and newborn                                  | Stroke/Transient ischaemic attack    |
| 441874   | Cerebral thrombosis                                                                                        | Stroke/Transient ischaemic attack    |
| 4110190  | Cerebral infarction due to embolism of precerebral arteries                                                | Stroke/Transient ischaemic attack    |
| 4049659  | Subcortical hemorrhage                                                                                     | Stroke/Transient ischaemic attack    |
| 436519   | Perinatal intraventricular hemorrhage                                                                      | Stroke/Transient ischaemic attack    |
| 40479572 | Infarct of cerebrum due to iatrogenic cerebrovascular accident                                             | Stroke/Transient ischaemic attack    |
| 375557   | Cerebral embolism                                                                                          | Stroke/Transient ischaemic attack    |
| 4176892  | Cortical hemorrhage                                                                                        | Stroke/Transient ischaemic attack    |
| 4048278  | Intraventricular (nontraumatic) hemorrhage, grade 2, of fetus and newborn                                  | Stroke/Transient ischaemic attack    |
| 4306943  | Epidural hemorrhage                                                                                        | Stroke/Transient ischaemic attack    |
| 434155   | Intraventricular (nontraumatic) hemorrhage, grade 3, of fetus and newborn                                  | Stroke/Transient ischaemic attack    |
| 4071732  | Intracranial nontraumatic hemorrhage of fetus and newborn                                                  | Stroke/Transient ischaemic attack    |
| 43530851 | Chronic non-traumatic intracranial subdural hemorrhage                                                     | Stroke/Transient ischaemic attack    |
| 439944   | Subarachnoid hemorrhage following injury without open intracranial wound AND with no loss of consciousness | Stroke/Transient ischaemic attack    |
| 46273649 | Cerebral infarction due to occlusion of basilar artery                                                     | Stroke/Transient ischaemic attack    |
| 43530674 | Spontaneous cerebellar hemorrhage                                                                          | Stroke/Transient ischaemic attack    |
| 372435   | Periventricular leukomalacia                                                                               | Stroke/Transient ischaemic attack    |
| 433899   | Subdural hemorrhage following injury without open intracranial wound AND with loss of consciousness        | Stroke/Transient ischaemic attack    |
| 438003   | Subarachnoid hemorrhage following injury without open intracranial wound AND with loss of consciousness    | Stroke/Transient ischaemic attack    |
| 440869   | Intracranial hemorrhage following injury without open intracranial wound AND with no loss of consciousness | Stroke/Transient ischaemic attack    |
| 444198   | Intracranial hemorrhage following injury with loss of consciousness                                        | Stroke/Transient ischaemic attack    |
| 46270031 | Cerebral infarction due to occlusion of precerebral artery                                                 | Stroke/Transient ischaemic attack    |
| 436430   | Nontraumatic extradural hemorrhage                                                                         | Stroke/Transient ischaemic attack    |

## SUPPORTING INFORMATION Newby 2022 Metformin versus sulfonylureas on Dementia and Parkinson's risk

|          |                                                                                                                                                                                           |                                   |
|----------|-------------------------------------------------------------------------------------------------------------------------------------------------------------------------------------------|-----------------------------------|
| 42535425 | Spontaneous hemorrhage of cerebral hemisphere                                                                                                                                             | Stroke/Transient ischaemic attack |
| 4319328  | Brain stem hemorrhage                                                                                                                                                                     | Stroke/Transient ischaemic attack |
| 440236   | Subdural hemorrhage following injury without open intracranial wound AND with brief loss of consciousness                                                                                 | Stroke/Transient ischaemic attack |
| 434789   | Subarachnoid hemorrhage following injury without open intracranial wound AND with brief loss of consciousness                                                                             | Stroke/Transient ischaemic attack |
| 378544   | Subdural and cerebral hemorrhage due to birth trauma                                                                                                                                      | Stroke/Transient ischaemic attack |
| 252477   | Extradural hemorrhage following injury without open intracranial wound                                                                                                                    | Stroke/Transient ischaemic attack |
| 4046360  | Lacunar infarction                                                                                                                                                                        | Stroke/Transient ischaemic attack |
| 433058   | Intracranial hemorrhage following injury without open intracranial wound AND with loss of consciousness                                                                                   | Stroke/Transient ischaemic attack |
| 4318408  | Subdural hematoma                                                                                                                                                                         | Stroke/Transient ischaemic attack |
| 438285   | Subdural hemorrhage following injury without open intracranial wound AND with prolonged loss of consciousness (more than 24 hours) without return to pre-existing conscious level         | Stroke/Transient ischaemic attack |
| 438873   | Closed fracture of base of skull with intracranial hemorrhage                                                                                                                             | Stroke/Transient ischaemic attack |
| 373347   | Subdural hemorrhage following injury without open intracranial wound AND with concussion                                                                                                  | Stroke/Transient ischaemic attack |
| 438596   | Intracranial hemorrhage following injury without open intracranial wound AND with brief loss of consciousness                                                                             | Stroke/Transient ischaemic attack |
| 443752   | Ventricular hemorrhage                                                                                                                                                                    | Stroke/Transient ischaemic attack |
| 4111714  | Cerebral infarction due to cerebral venous thrombosis, non-pyogenic                                                                                                                       | Stroke/Transient ischaemic attack |
| 4108952  | Subarachnoid hemorrhage from carotid siphon and bifurcation                                                                                                                               | Stroke/Transient ischaemic attack |
| 4110186  | Intracerebral hemorrhage, multiple localized                                                                                                                                              | Stroke/Transient ischaemic attack |
| 444197   | Intracranial hemorrhage following injury with brief loss of consciousness                                                                                                                 | Stroke/Transient ischaemic attack |
| 440537   | Closed skull fracture with intracranial hemorrhage                                                                                                                                        | Stroke/Transient ischaemic attack |
| 441432   | Extradural hemorrhage following injury without open intracranial wound AND with no loss of consciousness                                                                                  | Stroke/Transient ischaemic attack |
| 4046090  | Mixed cortical and subcortical vascular dementia                                                                                                                                          | Stroke/Transient ischaemic attack |
| 437413   | Subarachnoid hemorrhage following injury without open intracranial wound AND with prolonged loss of consciousness (more than 24 hours) AND without return to pre-existing conscious level | Stroke/Transient ischaemic attack |
| 434166   | Closed fracture of vault of skull with intracranial hemorrhage                                                                                                                            | Stroke/Transient ischaemic attack |
| 432764   | Intracranial hemorrhage following injury without open intracranial wound AND with prolonged loss of consciousness (more than 24 hours) without return to pre-existing level               | Stroke/Transient ischaemic attack |
| 440250   | Subarachnoid hemorrhage following injury without open intracranial wound AND with concussion                                                                                              | Stroke/Transient ischaemic attack |
| 260841   | Perinatal subarachnoid hemorrhage                                                                                                                                                         | Stroke/Transient ischaemic attack |
| 4110185  | Intracerebral hemorrhage, intraventricular                                                                                                                                                | Stroke/Transient ischaemic attack |
| 42535426 | Acute nontraumatic subdural hemorrhage                                                                                                                                                    | Stroke/Transient ischaemic attack |
| 4017105  | Subdural hemorrhage following open wound of head                                                                                                                                          | Stroke/Transient ischaemic attack |
| 432478   | Intracranial hemorrhage following injury without open intracranial wound AND with concussion                                                                                              | Stroke/Transient ischaemic attack |
| 255105   | Extradural hemorrhage following injury without open intracranial wound AND with loss of consciousness                                                                                     | Stroke/Transient ischaemic attack |
| 40492969 | Intraparenchymal hemorrhage of brain                                                                                                                                                      | Stroke/Transient ischaemic attack |
| 4045737  | Pure motor lacunar infarction                                                                                                                                                             | Stroke/Transient ischaemic attack |
| 441709   | Subarachnoid hemorrhage following injury with open intracranial wound                                                                                                                     | Stroke/Transient ischaemic attack |
| 437133   | Subdural hemorrhage following injury without open intracranial wound AND with moderate loss of consciousness                                                                              | Stroke/Transient ischaemic attack |
| 4046362  | Hemorrhagic cerebral infarction                                                                                                                                                           | Stroke/Transient ischaemic attack |
| 4345688  | Intracerebral hemorrhage in fetus or newborn                                                                                                                                              | Stroke/Transient ischaemic attack |
| 435391   | Subdural hemorrhage following injury without open intracranial wound AND with prolonged loss of consciousness (more than 24 hours) AND return to pre-existing conscious level             | Stroke/Transient ischaemic attack |
| 437106   | Intracranial hemorrhage following injury with prolonged loss of consciousness without return to pre-existing conscious level                                                              | Stroke/Transient ischaemic attack |
| 4111708  | Subarachnoid hemorrhage from vertebral artery                                                                                                                                             | Stroke/Transient ischaemic attack |
| 439182   | Subarachnoid hemorrhage following injury without open intracranial wound AND with moderate loss of consciousness                                                                          | Stroke/Transient ischaemic attack |
| 42539269 | Spontaneous hemorrhage of brain stem                                                                                                                                                      | Stroke/Transient ischaemic attack |
| 4130539  | Subdural hemorrhage due to birth trauma                                                                                                                                                   | Stroke/Transient ischaemic attack |
| 435390   | Subarachnoid hemorrhage following injury without open intracranial wound AND with prolonged loss of consciousness (more than 24 hours) AND return to pre-existing conscious level         | Stroke/Transient ischaemic attack |
| 434785   | Intracranial hemorrhage following injury with open intracranial wound                                                                                                                     | Stroke/Transient ischaemic attack |
| 261433   | Extradural hemorrhage following injury without open intracranial wound AND with brief loss of consciousness                                                                               | Stroke/Transient ischaemic attack |

## SUPPORTING INFORMATION Newby 2022 Metformin versus sulfonylureas on Dementia and Parkinson's risk

|          |                                                                                                                                                                                     |                                   |
|----------|-------------------------------------------------------------------------------------------------------------------------------------------------------------------------------------|-----------------------------------|
| 436841   | Intracranial hemorrhage following injury without intracranial wound AND with moderate loss of consciousness                                                                         | Stroke/Transient ischaemic attack |
| 436842   | Intracranial hemorrhage following injury without open intracranial wound AND with prolonged loss of consciousness (more than 24 hours) AND return to pre-existing conscious level   | Stroke/Transient ischaemic attack |
| 4326561  | Cerebellar hemorrhage                                                                                                                                                               | Stroke/Transient ischaemic attack |
| 444196   | Intracranial hemorrhage following injury with moderate loss of consciousness                                                                                                        | Stroke/Transient ischaemic attack |
| 435931   | Open skull fracture with intracranial hemorrhage                                                                                                                                    | Stroke/Transient ischaemic attack |
| 4048279  | Intraventricular hemorrhage due to birth injury                                                                                                                                     | Stroke/Transient ischaemic attack |
| 4045738  | Pure sensory lacunar infarction                                                                                                                                                     | Stroke/Transient ischaemic attack |
| 433037   | Open fracture of vault of skull with intracranial hemorrhage                                                                                                                        | Stroke/Transient ischaemic attack |
| 436526   | Intracranial hemorrhage following injury with prolonged loss of consciousness AND return to pre-existing conscious level                                                            | Stroke/Transient ischaemic attack |
| 440870   | Subdural hemorrhage following injury with open intracranial wound, with no loss of consciousness                                                                                    | Stroke/Transient ischaemic attack |
| 4136546  | Traumatic subdural hematoma                                                                                                                                                         | Stroke/Transient ischaemic attack |
| 435378   | Open fracture of base of skull with intracranial hemorrhage                                                                                                                         | Stroke/Transient ischaemic attack |
| 4071589  | Cerebral hemorrhage due to birth injury                                                                                                                                             | Stroke/Transient ischaemic attack |
| 4046089  | Vascular dementia of acute onset                                                                                                                                                    | Stroke/Transient ischaemic attack |
| 4218781  | Cerebral hemisphere hemorrhage                                                                                                                                                      | Stroke/Transient ischaemic attack |
| 4142739  | Thalamic infarction                                                                                                                                                                 | Stroke/Transient ischaemic attack |
| 37016924 | Dissection of cerebral artery                                                                                                                                                       | Stroke/Transient ischaemic attack |
| 4048606  | Cerebellar (nontraumatic) and posterior fossa hemorrhage of fetus and newborn                                                                                                       | Stroke/Transient ischaemic attack |
| 440244   | Subarachnoid hemorrhage following injury with open intracranial wound AND loss of consciousness                                                                                     | Stroke/Transient ischaemic attack |
| 435104   | Subarachnoid hemorrhage following injury with open intracranial wound, with no loss of consciousness                                                                                | Stroke/Transient ischaemic attack |
| 439194   | Subdural hemorrhage following injury with open intracranial wound AND loss of consciousness                                                                                         | Stroke/Transient ischaemic attack |
| 435964   | Subarachnoid hemorrhage following injury with open intracranial wound AND brief loss of consciousness                                                                               | Stroke/Transient ischaemic attack |
| 4077086  | Occipital cerebral infarction                                                                                                                                                       | Stroke/Transient ischaemic attack |
| 433052   | Intracranial hemorrhage following injury with open intracranial wound AND no loss of consciousness                                                                                  | Stroke/Transient ischaemic attack |
| 4145897  | Multiple lacunar infarcts                                                                                                                                                           | Stroke/Transient ischaemic attack |
| 436557   | Extradural hemorrhage following injury without open intracranial wound AND with prolonged loss of consciousness (more than 24 hours) without return to pre-existing conscious level | Stroke/Transient ischaemic attack |
| 4071066  | Subarachnoid hemorrhage due to birth injury                                                                                                                                         | Stroke/Transient ischaemic attack |
| 435960   | Extradural hemorrhage following injury with open intracranial wound                                                                                                                 | Stroke/Transient ischaemic attack |
| 433624   | Intracranial hemorrhage following injury with open intracranial wound AND loss of consciousness                                                                                     | Stroke/Transient ischaemic attack |
| 381440   | Extradural hemorrhage following injury without open intracranial wound AND with concussion                                                                                          | Stroke/Transient ischaemic attack |
| 435672   | Intracranial hemorrhage following injury with open intracranial wound and prolonged loss of consciousness (more than 24 hours) without return to pre-existing level                 | Stroke/Transient ischaemic attack |
| 36716544 | Fetal or neonatal non-traumatic intraventricular hemorrhage                                                                                                                         | Stroke/Transient ischaemic attack |
| 4146185  | Right sided cerebral infarction                                                                                                                                                     | Stroke/Transient ischaemic attack |
| 4141405  | Left sided cerebral infarction                                                                                                                                                      | Stroke/Transient ischaemic attack |
| 4131383  | Infarction of basal ganglia                                                                                                                                                         | Stroke/Transient ischaemic attack |
| 432474   | Subdural hemorrhage following injury with open intracranial wound and prolonged loss of consciousness (more than 24 hours) and without return to pre-existing conscious level       | Stroke/Transient ischaemic attack |
| 256844   | Extradural hemorrhage following injury without open intracranial wound AND with moderate loss of consciousness                                                                      | Stroke/Transient ischaemic attack |
| 432752   | Subdural hemorrhage following injury with open intracranial wound AND brief loss of consciousness                                                                                   | Stroke/Transient ischaemic attack |
| 439171   | Subarachnoid hemorrhage following injury with open intracranial wound AND prolonged loss of consciousness (more than 24 hours) without return to pre-existing conscious level       | Stroke/Transient ischaemic attack |
| 433050   | Subdural hemorrhage following injury with open intracranial wound AND concussion                                                                                                    | Stroke/Transient ischaemic attack |
| 42535424 | Spontaneous hemorrhage of cortical intracerebral hemisphere                                                                                                                         | Stroke/Transient ischaemic attack |
| 42872427 | Cerebral hemorrhage following injury                                                                                                                                                | Stroke/Transient ischaemic attack |
| 439950   | Intracranial hemorrhage following injury with open intracranial wound AND concussion                                                                                                | Stroke/Transient ischaemic attack |
| 441158   | Intracranial hemorrhage following injury with open intracranial wound AND prolonged loss of consciousness (more than 24 hours) AND return to pre-existing conscious level           | Stroke/Transient ischaemic attack |
| 43531607 | Cerebral infarction due to stenosis of carotid artery                                                                                                                               | Stroke/Transient ischaemic attack |

## SUPPORTING INFORMATION Newby 2022 Metformin versus sulfonylureas on Dementia and Parkinson's risk

|          |                                                                                                                                                                                 |                                   |
|----------|---------------------------------------------------------------------------------------------------------------------------------------------------------------------------------|-----------------------------------|
| 4112018  | Basal ganglia hemorrhage                                                                                                                                                        | Stroke/Transient ischaemic attack |
| 4045745  | Thalamic hemorrhage                                                                                                                                                             | Stroke/Transient ischaemic attack |
| 373057   | Subarachnoid hemorrhage following injury with open intracranial wound AND concussion                                                                                            | Stroke/Transient ischaemic attack |
| 4138327  | Acute lacunar infarction                                                                                                                                                        | Stroke/Transient ischaemic attack |
| 433623   | Intracranial hemorrhage following injury with open intracranial wound AND brief loss of consciousness                                                                           | Stroke/Transient ischaemic attack |
| 256556   | Extradural hemorrhage following injury without open intracranial wound AND with prolonged loss of consciousness (more than 24 hours) AND return to pre-existing conscious level | Stroke/Transient ischaemic attack |
| 441985   | Subdural hemorrhage following injury with open intracranial wound AND moderate loss of consciousness                                                                            | Stroke/Transient ischaemic attack |
| 438894   | Subarachnoid hemorrhage following injury with open intracranial wound AND prolonged loss of consciousness (more than 24 hours) AND return to pre-existing conscious level       | Stroke/Transient ischaemic attack |
| 42538062 | Spontaneous intracranial hemorrhage                                                                                                                                             | Stroke/Transient ischaemic attack |
| 440251   | Subarachnoid hemorrhage following injury with open intracranial wound AND moderate loss of consciousness                                                                        | Stroke/Transient ischaemic attack |
| 43530683 | Cerebral infarction due to carotid artery occlusion                                                                                                                             | Stroke/Transient ischaemic attack |
| 4176148  | Extradural intracranial hematoma                                                                                                                                                | Stroke/Transient ischaemic attack |
| 433051   | Extradural hemorrhage following injury with open intracranial wound, with no loss of consciousness                                                                              | Stroke/Transient ischaemic attack |
| 432475   | Extradural hemorrhage following injury with open intracranial wound AND brief loss of consciousness                                                                             | Stroke/Transient ischaemic attack |
| 440561   | Intracranial hemorrhage following injury with intracranial wound AND moderate loss of consciousness                                                                             | Stroke/Transient ischaemic attack |
| 4136545  | Traumatic extradural hematoma                                                                                                                                                   | Stroke/Transient ischaemic attack |
| 4129534  | Pituitary apoplexy                                                                                                                                                              | Stroke/Transient ischaemic attack |
| 438279   | Extradural hemorrhage following injury with open intracranial wound AND loss of consciousness                                                                                   | Stroke/Transient ischaemic attack |
| 436553   | Subdural hemorrhage following injury with open intracranial wound AND prolonged loss of consciousness (more than 24 hours) AND return to pre-existing conscious level           | Stroke/Transient ischaemic attack |
| 4173481  | Cerebromeningeal hemorrhage                                                                                                                                                     | Stroke/Transient ischaemic attack |
| 439949   | Extradural hemorrhage following injury with open intracranial wound AND prolonged loss of consciousness (more than 24 hours) without return to pre-existing conscious level     | Stroke/Transient ischaemic attack |
| 434508   | Extradural hemorrhage following injury with open intracranial wound AND concussion                                                                                              | Stroke/Transient ischaemic attack |
| 4199890  | Hematoma of brain                                                                                                                                                               | Stroke/Transient ischaemic attack |
| 436258   | Extradural hemorrhage following injury with open intracranial wound AND prolonged loss of consciousness (more than 24 hours) AND return to pre-existing conscious level         | Stroke/Transient ischaemic attack |
| 4121664  | Chronic intracranial subdural hematoma                                                                                                                                          | Stroke/Transient ischaemic attack |
| 442341   | Extradural hemorrhage following injury with open intracranial wound AND moderate loss of consciousness                                                                          | Stroke/Transient ischaemic attack |
| 4106058  | Non-traumatic intracranial subdural hematoma                                                                                                                                    | Stroke/Transient ischaemic attack |
| 4077958  | Subarachnoid hemorrhage from anterior communicating artery aneurysm                                                                                                             | Stroke/Transient ischaemic attack |
| 4079973  | Perinatal subependymal hemorrhage                                                                                                                                               | Stroke/Transient ischaemic attack |
| 4299377  | Intrapontine hemorrhage                                                                                                                                                         | Stroke/Transient ischaemic attack |
| 44782730 | Nontraumatic intraparenchymal cerebral hemorrhage                                                                                                                               | Stroke/Transient ischaemic attack |
| 4077201  | Subarachnoid hemorrhage from basilar artery aneurysm                                                                                                                            | Stroke/Transient ischaemic attack |
| 4045744  | Lobar cerebral hemorrhage                                                                                                                                                       | Stroke/Transient ischaemic attack |
| 4328027  | Intraparenchymal hematoma of brain                                                                                                                                              | Stroke/Transient ischaemic attack |
| 4242720  | Intracranial hematoma following injury                                                                                                                                          | Stroke/Transient ischaemic attack |
| 4046365  | Subarachnoid hemorrhage due to ruptured aneurysm                                                                                                                                | Stroke/Transient ischaemic attack |
| 42872434 | Intracranial hematoma                                                                                                                                                           | Stroke/Transient ischaemic attack |
| 4174299  | Perinatal intracranial hemorrhage                                                                                                                                               | Stroke/Transient ischaemic attack |
| 4045735  | Anterior cerebral circulation infarction                                                                                                                                        | Stroke/Transient ischaemic attack |
| 4178726  | Internal capsule hemorrhage                                                                                                                                                     | Stroke/Transient ischaemic attack |
| 37116267 | Hemorrhage of medulla oblongata                                                                                                                                                 | Stroke/Transient ischaemic attack |
| 4201635  | Traumatic subdural hematoma with open intracranial wound                                                                                                                        | Stroke/Transient ischaemic attack |
| 36716579 | Traumatic subarachnoid hemorrhage without coma                                                                                                                                  | Stroke/Transient ischaemic attack |
| 4129535  | Pituitary hemorrhage                                                                                                                                                            | Stroke/Transient ischaemic attack |
| 46270380 | Cerebral infarction due to vertebral artery stenosis                                                                                                                            | Stroke/Transient ischaemic attack |
| 45766830 | Non-aneurysmal perimesencephalic subarachnoid hemorrhage                                                                                                                        | Stroke/Transient ischaemic attack |
| 44782773 | Cerebral infarction due to vertebral artery occlusion                                                                                                                           | Stroke/Transient ischaemic attack |
| 43530728 | Subacute non-traumatic intracranial subdural hemorrhage                                                                                                                         | Stroke/Transient ischaemic attack |
| 42873046 | Hemorrhage in putamen                                                                                                                                                           | Stroke/Transient ischaemic attack |
| 42873045 | Hemorrhage in caudate nucleus                                                                                                                                                   | Stroke/Transient ischaemic attack |
| 37110679 | Cerebral ischemic stroke due to stenosis of extracranial large artery                                                                                                           | Stroke/Transient ischaemic attack |
| 36717605 | Silent cerebral infarct                                                                                                                                                         | Stroke/Transient ischaemic attack |

## SUPPORTING INFORMATION Newby 2022 Metformin versus sulfonylureas on Dementia and Parkinson's risk

|          |                                                                                        |                                   |
|----------|----------------------------------------------------------------------------------------|-----------------------------------|
| 36716627 | Traumatic intraventricular hemorrhage                                                  | Stroke/Transient ischaemic attack |
| 36716567 | Focal hemorrhagic contusion of cerebrum                                                | Stroke/Transient ischaemic attack |
| 4201094  | Cerebellar hematoma                                                                    | Stroke/Transient ischaemic attack |
| 4196275  | Traumatic subdural hematoma without open intracranial wound                            | Stroke/Transient ischaemic attack |
| 4180743  | Intraventricular hemorrhage of fetus                                                   | Stroke/Transient ischaemic attack |
| 4171123  | Perinatal subependymal hemorrhage with intraventricular and intracerebral extension    | Stroke/Transient ischaemic attack |
| 4154699  | Traumatic intracranial subdural hematoma with brief loss of consciousness              | Stroke/Transient ischaemic attack |
| 4151359  | Pars basalis hemorrhage                                                                | Stroke/Transient ischaemic attack |
| 4139778  | Hemorrhage due to ruptured congenital cerebral aneurysm                                | Stroke/Transient ischaemic attack |
| 4112019  | External capsule hemorrhage                                                            | Stroke/Transient ischaemic attack |
| 4085234  | Non-traumatic extradural intracranial hematoma                                         | Stroke/Transient ischaemic attack |
| 4080892  | Intracerebellar and posterior fossa hemorrhage                                         | Stroke/Transient ischaemic attack |
| 4079972  | Intraventricular hemorrhage of prematurity                                             | Stroke/Transient ischaemic attack |
| 4078448  | Subarachnoid hemorrhage from carotid artery aneurysm                                   | Stroke/Transient ischaemic attack |
| 4078447  | Subarachnoid hemorrhage from posterior inferior cerebellar artery aneurysm             | Stroke/Transient ischaemic attack |
| 4078446  | Subarachnoid hemorrhage from middle cerebral artery aneurysm                           | Stroke/Transient ischaemic attack |
| 4077959  | Subarachnoid hemorrhage from posterior communicating artery aneurysm                   | Stroke/Transient ischaemic attack |
| 4077828  | Subarachnoid hemorrhage from anterior cerebral artery aneurysm                         | Stroke/Transient ischaemic attack |
| 4077827  | Subarachnoid hemorrhage from multiple aneurysms                                        | Stroke/Transient ischaemic attack |
| 4077200  | Subarachnoid hemorrhage from posterior cerebral artery aneurysm                        | Stroke/Transient ischaemic attack |
| 4047731  | Local subdural hematoma due to birth trauma                                            | Stroke/Transient ischaemic attack |
| 4046361  | Pure sensorimotor lacunar infarction                                                   | Stroke/Transient ischaemic attack |
| 4046359  | Partial anterior cerebral circulation infarction                                       | Stroke/Transient ischaemic attack |
| 4045746  | Lacunar hemorrhage                                                                     | Stroke/Transient ischaemic attack |
| 4045741  | Dysarthria-clumsy hand syndrome                                                        | Stroke/Transient ischaemic attack |
| 4045740  | Lacunar ataxic hemiparesis                                                             | Stroke/Transient ischaemic attack |
| 4043732  | Posterior cerebral circulation hemorrhagic infarction                                  | Stroke/Transient ischaemic attack |
| 4009796  | Intracranial hemorrhage following injury without open intracranial wound               | Stroke/Transient ischaemic attack |
| 762937   | Cerebral infarction due to cerebral venous thrombosis                                  | Stroke/Transient ischaemic attack |
| 46273491 | Spontaneous cerebral hemorrhage with compression of brain                              | Stroke/Transient ischaemic attack |
| 46270111 | Nontraumatic subarachnoid hemorrhage with brain compression                            | Stroke/Transient ischaemic attack |
| 45766120 | Convexal subarachnoid hemorrhage                                                       | Stroke/Transient ischaemic attack |
| 45766119 | Perimesencephalic subarachnoid hemorrhage                                              | Stroke/Transient ischaemic attack |
| 45766118 | Non-aneurysmal subarachnoid intracranial hemorrhage                                    | Stroke/Transient ischaemic attack |
| 45766068 | Deep hemispheric cerebral hemorrhage                                                   | Stroke/Transient ischaemic attack |
| 43530671 | Nontraumatic subdural hematoma with brain compression                                  | Stroke/Transient ischaemic attack |
| 42873123 | Hemorrhage of intracranial meningeal space                                             | Stroke/Transient ischaemic attack |
| 42873044 | Hemorrhage in globus pallidus                                                          | Stroke/Transient ischaemic attack |
| 42873042 | Subpial intracranial hemorrhage                                                        | Stroke/Transient ischaemic attack |
| 42537643 | Dissection of basilar artery                                                           | Stroke/Transient ischaemic attack |
| 42535465 | Lacunar ataxic hemiparesis of right dominant side                                      | Stroke/Transient ischaemic attack |
| 37394466 | Intraventricular (nontraumatic) haemorrhage, grade 4, of fetus and newborn             | Stroke/Transient ischaemic attack |
| 37116473 | Multifocal cerebral infarction due to and following procedure on cardiovascular system | Stroke/Transient ischaemic attack |
| 37109909 | Silent micro-hemorrhage of brain                                                       | Stroke/Transient ischaemic attack |
| 37109288 | Traumatic subarachnoid hemorrhage with loss of consciousness                           | Stroke/Transient ischaemic attack |
| 36716583 | Multiple traumatic hemorrhages of brain tissue                                         | Stroke/Transient ischaemic attack |
| 36716580 | Traumatic hemorrhage of cerebral white matter                                          | Stroke/Transient ischaemic attack |
| 36716572 | Focal traumatic hematoma of cerebellum                                                 | Stroke/Transient ischaemic attack |
| 36716545 | Fetal or neonatal intracerebral non-traumatic hemorrhage                               | Stroke/Transient ischaemic attack |
| 4323618  | Occipital subdural hematoma                                                            | Stroke/Transient ischaemic attack |
| 4319146  | Pituitary infarction                                                                   | Stroke/Transient ischaemic attack |
| 4298750  | Periventricular hemorrhagic venous infarct                                             | Stroke/Transient ischaemic attack |
| 4201028  | Traumatic extradural hematoma with open intracranial wound                             | Stroke/Transient ischaemic attack |
| 4196276  | Traumatic extradural hematoma without open intracranial wound                          | Stroke/Transient ischaemic attack |
| 4183593  | Subdural hemorrhage in fetus or newborn                                                | Stroke/Transient ischaemic attack |
| 4180610  | Occipital extradural hematoma                                                          | Stroke/Transient ischaemic attack |
| 4162754  | Postpartum intrapituitary hemorrhage                                                   | Stroke/Transient ischaemic attack |
| 4119140  | Infarction of visual cortex                                                            | Stroke/Transient ischaemic attack |
| 4048784  | Anterior cerebral circulation hemorrhagic infarction                                   | Stroke/Transient ischaemic attack |
| 4048133  | Extradural hemorrhage in fetus or newborn                                              | Stroke/Transient ischaemic attack |
| 4047732  | Cerebral hematoma in fetus or newborn                                                  | Stroke/Transient ischaemic attack |
| 4046364  | Subarachnoid hemorrhage due to ruptured arteriovenous malformation                     | Stroke/Transient ischaemic attack |
| 4046358  | Total anterior cerebral circulation infarction                                         | Stroke/Transient ischaemic attack |
| 4045743  | Massive supratentorial cerebral hemorrhage                                             | Stroke/Transient ischaemic attack |

## SUPPORTING INFORMATION Newby 2022 Metformin versus sulfonylureas on Dementia and Parkinson's risk

|          |                                                                |                                   |
|----------|----------------------------------------------------------------|-----------------------------------|
| 4031045  | Anterior choroidal artery syndrome                             | Stroke/Transient ischaemic attack |
| 765899   | Dissecting aneurysm of cerebral artery                         | Stroke/Transient ischaemic attack |
| 765515   | Cerebral infarction due to basilar artery stenosis             | Stroke/Transient ischaemic attack |
| 764721   | Cerebrovascular accident with intracranial hemorrhage          | Stroke/Transient ischaemic attack |
| 763015   | Cerebral infarction due to middle cerebral artery occlusion    | Stroke/Transient ischaemic attack |
| 762935   | Cerebral infarction due to internal carotid artery occlusion   | Stroke/Transient ischaemic attack |
| 762934   | Cerebral infarction due to posterior cerebral artery occlusion | Stroke/Transient ischaemic attack |
| 762933   | Cerebral infarction due to cerebral artery occlusion           | Stroke/Transient ischaemic attack |
| 762585   | Dissecting aneurysm of anterior cerebral artery                | Stroke/Transient ischaemic attack |
| 762583   | Dissecting aneurysm of middle cerebral artery                  | Stroke/Transient ischaemic attack |
| 46272244 | Transient ischemic attack due to embolism                      | Stroke/Transient ischaemic attack |
| 40485430 | Recurrent transient cerebral ischemic attack                   | Stroke/Transient ischaemic attack |
| 36712813 | Amaurosis fugax of right eye                                   | Stroke/Transient ischaemic attack |
| 36712812 | Amaurosis fugax of left eye                                    | Stroke/Transient ischaemic attack |
| 4338523  | Amaurosis fugax                                                | Stroke/Transient ischaemic attack |
| 4139517  | Transient cerebral ischemia due to atrial fibrillation         | Stroke/Transient ischaemic attack |
| 4112020  | Carotid artery syndrome hemispheric                            | Stroke/Transient ischaemic attack |
| 4110195  | Posterior cerebral artery syndrome                             | Stroke/Transient ischaemic attack |
| 4110194  | Middle cerebral artery syndrome                                | Stroke/Transient ischaemic attack |
| 4108360  | Anterior cerebral artery syndrome                              | Stroke/Transient ischaemic attack |
| 4048785  | Vertebrobasilar territory transient ischemic attack            | Stroke/Transient ischaemic attack |
| 4043734  | Carotid territory transient ischemic attack                    | Stroke/Transient ischaemic attack |
| 374055   | Basilar artery syndrome                                        | Stroke/Transient ischaemic attack |
| 373503   | Transient cerebral ischemia                                    | Stroke/Transient ischaemic attack |
| 438120   | Opioid dependence                                              | Substance Abuse                   |
| 435243   | Alcohol dependence                                             | Substance Abuse                   |
| 433753   | Alcohol abuse                                                  | Substance Abuse                   |
| 4239381  | Psychoactive substance abuse                                   | Substance Abuse                   |
| 375519   | Alcohol withdrawal syndrome                                    | Substance Abuse                   |
| 440069   | Drug dependence                                                | Substance Abuse                   |
| 196463   | Alcoholic cirrhosis                                            | Substance Abuse                   |
| 439312   | Nondependent mixed drug abuse                                  | Substance Abuse                   |
| 440693   | Continuous opioid dependence                                   | Substance Abuse                   |
| 436953   | Continuous chronic alcoholism                                  | Substance Abuse                   |
| 439005   | Chronic alcoholism in remission                                | Substance Abuse                   |
| 432301   | Opioid dependence in remission                                 | Substance Abuse                   |
| 40479573 | Stimulant abuse                                                | Substance Abuse                   |
| 46269816 | Ascites due to alcoholic cirrhosis                             | Substance Abuse                   |
| 377830   | Alcohol withdrawal delirium                                    | Substance Abuse                   |
| 435534   | Nondependent alcohol abuse, continuous                         | Substance Abuse                   |
| 36714559 | Disorder caused by alcohol                                     | Substance Abuse                   |
| 441276   | Nondependent alcohol abuse in remission                        | Substance Abuse                   |
| 201612   | Alcoholic liver damage                                         | Substance Abuse                   |
| 437257   | Continuous acute alcoholic intoxication in alcoholism          | Substance Abuse                   |
| 4340383  | Alcoholic hepatitis                                            | Substance Abuse                   |
| 4102817  | Combined opioid with other drug dependence, continuous         | Substance Abuse                   |
| 195300   | Alcoholic gastritis                                            | Substance Abuse                   |
| 193256   | Alcoholic fatty liver                                          | Substance Abuse                   |
| 440685   | Nondependent alcohol abuse, episodic                           | Substance Abuse                   |
| 4099809  | Combined opioid with other drug dependence                     | Substance Abuse                   |
| 434019   | Nondependent cannabis abuse, continuous                        | Substance Abuse                   |
| 4103426  | Nondependent mixed drug abuse in remission                     | Substance Abuse                   |
| 435532   | Episodic chronic alcoholism                                    | Substance Abuse                   |
| 378421   | Alcoholic polyneuropathy                                       | Substance Abuse                   |
| 435231   | Nondependent cannabis abuse in remission                       | Substance Abuse                   |
| 434016   | Nondependent opioid abuse, continuous                          | Substance Abuse                   |
| 436097   | Nondependent mixed drug abuse, continuous                      | Substance Abuse                   |
| 436585   | Toxic effect of ethyl alcohol                                  | Substance Abuse                   |
| 434328   | Nondependent cannabis abuse, episodic                          | Substance Abuse                   |
| 439796   | Nondependent cocaine abuse, continuous                         | Substance Abuse                   |
| 4279309  | Substance abuse                                                | Substance Abuse                   |
| 376383   | Alcohol-induced organic mental disorder                        | Substance Abuse                   |
| 4088373  | Alcohol intoxication delirium                                  | Substance Abuse                   |
| 4340386  | Alcoholic hepatic failure                                      | Substance Abuse                   |
| 440379   | Episodic opioid dependence                                     | Substance Abuse                   |
| 374623   | Alcohol amnestic disorder                                      | Substance Abuse                   |
| 435983   | Accidental poisoning with ethyl alcohol                        | Substance Abuse                   |
| 440694   | Nondependent mixed drug abuse, episodic                        | Substance Abuse                   |
| 372607   | Alcohol hallucinosis                                           | Substance Abuse                   |
| 4026131  | Non-alcoholic fatty liver                                      | Substance Abuse                   |
| 441261   | Episodic acute alcoholic intoxication in alcoholism            | Substance Abuse                   |

## SUPPORTING INFORMATION Newby 2022 Metformin versus sulfonylureas on Dementia and Parkinson's risk

|          |                                                                                 |                 |
|----------|---------------------------------------------------------------------------------|-----------------|
| 4218106  | Alcoholism                                                                      | Substance Abuse |
| 45757783 | Gastric hemorrhage due to alcoholic gastritis                                   | Substance Abuse |
| 439277   | Alcohol withdrawal hallucinosis                                                 | Substance Abuse |
| 438126   | Amphetamine abuse, continuous                                                   | Substance Abuse |
| 4100520  | Combined opioid with other drug dependence in remission                         | Substance Abuse |
| 4100524  | Nondependent hypnotic or anxiolytic abuse, continuous                           | Substance Abuse |
| 374317   | Alcohol-induced psychosis                                                       | Substance Abuse |
| 440992   | Abuse of antidepressant drug                                                    | Substance Abuse |
| 441465   | Accidental poisoning by alcoholic beverage                                      | Substance Abuse |
| 4103413  | Combined opioid with other drug dependence, episodic                            | Substance Abuse |
| 432609   | Acute alcoholic intoxication in remission, in alcoholism                        | Substance Abuse |
| 45757093 | Alcohol dependence in pregnancy                                                 | Substance Abuse |
| 440381   | Nondependent hallucinogen abuse, continuous                                     | Substance Abuse |
| 436954   | Drug abuse                                                                      | Substance Abuse |
| 43530681 | Drug abuse in remission                                                         | Substance Abuse |
| 434627   | Nondependent antidepressant type drug abuse, continuous                         | Substance Abuse |
| 4144765  | Drug-induced disorder of liver                                                  | Substance Abuse |
| 4333676  | Heroin dependence                                                               | Substance Abuse |
| 4332883  | Methadone dependence                                                            | Substance Abuse |
| 4109691  | Persistent alcohol abuse                                                        | Substance Abuse |
| 4275756  | Dependent drug abuse                                                            | Substance Abuse |
| 4152165  | Nondependent alcohol abuse                                                      | Substance Abuse |
| 441272   | Nondependent hallucinogen abuse in remission                                    | Substance Abuse |
| 4175635  | Non dependent drug abuse                                                        | Substance Abuse |
| 37017563 | Severe alcohol dependence                                                       | Substance Abuse |
| 439313   | Nondependent antidepressant type drug abuse in remission                        | Substance Abuse |
| 4089921  | Abuse of antacids                                                               | Substance Abuse |
| 4092159  | Abuse of vitamins                                                               | Substance Abuse |
| 434917   | Nondependent antidepressant type drug abuse, episodic                           | Substance Abuse |
| 37018356 | Moderate alcohol dependence                                                     | Substance Abuse |
| 42872387 | Opioid dependence, on agonist therapy                                           | Substance Abuse |
| 4145220  | Drug abuse, continuous                                                          | Substance Abuse |
| 4143110  | Episodic drug abuse                                                             | Substance Abuse |
| 4103419  | Nondependent cannabis abuse                                                     | Substance Abuse |
| 439554   | Hypnotic or anxiolytic abuse                                                    | Substance Abuse |
| 4321741  | Drug habituation                                                                | Substance Abuse |
| 4148021  | Esophageal varices in alcoholic cirrhosis of the liver                          | Substance Abuse |
| 4338027  | Morphine dependence                                                             | Substance Abuse |
| 4146181  | Chronic alcoholic hepatitis                                                     | Substance Abuse |
| 4001994  | Chronic drug abuse                                                              | Substance Abuse |
| 37017009 | Chronic alcoholic liver disease                                                 | Substance Abuse |
| 4333674  | Abuse of nonpsychotropic analgesic drugs                                        | Substance Abuse |
| 438732   | Nondependent hallucinogen abuse, episodic                                       | Substance Abuse |
| 4310679  | Uncomplicated alcohol withdrawal                                                | Substance Abuse |
| 4332990  | Opium dependence                                                                | Substance Abuse |
| 4138193  | Fentanyl dependence                                                             | Substance Abuse |
| 36715922 | Fibrosis of liver caused by alcohol                                             | Substance Abuse |
| 4143008  | Drug-induced cirrhosis of liver                                                 | Substance Abuse |
| 4024993  | Drug-induced gastrointestinal disturbance                                       | Substance Abuse |
| 37110407 | Opioid dependence with current use                                              | Substance Abuse |
| 4103424  | Nondependent amphetamine or psychostimulant abuse, continuous                   | Substance Abuse |
| 4091716  | Abuse of diuretics                                                              | Substance Abuse |
| 37017329 | Mild alcohol dependence                                                         | Substance Abuse |
| 4085362  | Abuse of drugs to lose weight                                                   | Substance Abuse |
| 4091715  | Abuse of herbal medicine                                                        | Substance Abuse |
| 4150794  | Nondependent hallucinogen abuse                                                 | Substance Abuse |
| 37109948 | Perceptual disturbances and seizures co-occurrent and due to alcohol withdrawal | Substance Abuse |
| 44782433 | Chronic abuse of laxatives                                                      | Substance Abuse |
| 4195620  | Zieve's syndrome                                                                | Substance Abuse |
| 42539100 | Synthetic cannabinoid abuse                                                     | Substance Abuse |
| 36713086 | Alcohol induced disorder co-occurrent and due to alcohol dependence             | Substance Abuse |
| 201826   | Type 2 diabetes mellitus                                                        | Type 2 Diabetes |
| 4193704  | Type 2 diabetes mellitus without complication                                   | Type 2 Diabetes |
| 40482801 | Type II diabetes mellitus uncontrolled                                          | Type 2 Diabetes |
| 37016349 | Hyperglycemia due to type 2 diabetes mellitus                                   | Type 2 Diabetes |
| 376065   | Disorder of nervous system due to type 2 diabetes mellitus                      | Type 2 Diabetes |
| 443731   | Renal disorder due to type 2 diabetes mellitus                                  | Type 2 Diabetes |
| 443732   | Disorder due to type 2 diabetes mellitus                                        | Type 2 Diabetes |
| 43531578 | Chronic kidney disease due to type 2 diabetes mellitus                          | Type 2 Diabetes |
| 442793   | Complication due to diabetes mellitus                                           | Type 2 Diabetes |

## SUPPORTING INFORMATION Newby 2022 Metformin versus sulfonylureas on Dementia and Parkinson's risk

|          |                                                                                                        |                 |
|----------|--------------------------------------------------------------------------------------------------------|-----------------|
| 443729   | Peripheral circulatory disorder due to type 2 diabetes mellitus                                        | Type 2 Diabetes |
| 201820   | Diabetes mellitus                                                                                      | Type 2 Diabetes |
| 376112   | Polyneuropathy due to diabetes mellitus                                                                | Type 2 Diabetes |
| 37017432 | Polyneuropathy due to type 2 diabetes mellitus                                                         | Type 2 Diabetes |
| 443733   | Disorder of eye due to type 2 diabetes mellitus                                                        | Type 2 Diabetes |
| 43530690 | Foot ulcer due to type 2 diabetes mellitus                                                             | Type 2 Diabetes |
| 376683   | Nonproliferative retinopathy due to diabetes mellitus                                                  | Type 2 Diabetes |
| 195771   | Secondary diabetes mellitus                                                                            | Type 2 Diabetes |
| 4008576  | Diabetes mellitus without complication                                                                 | Type 2 Diabetes |
| 380097   | Macular edema due to diabetes mellitus                                                                 | Type 2 Diabetes |
| 380096   | Proliferative retinopathy due to diabetes mellitus                                                     | Type 2 Diabetes |
| 43530685 | Proliferative retinopathy due to type 2 diabetes mellitus                                              | Type 2 Diabetes |
| 45757435 | Mild nonproliferative retinopathy due to type 2 diabetes mellitus                                      | Type 2 Diabetes |
| 4009303  | Diabetic ketoacidosis without coma                                                                     | Type 2 Diabetes |
| 443734   | Ketoacidosis due to type 2 diabetes mellitus                                                           | Type 2 Diabetes |
| 45770830 | Macular edema and retinopathy due to type 2 diabetes mellitus                                          | Type 2 Diabetes |
| 45757363 | Hypoglycemia due to type 2 diabetes mellitus                                                           | Type 2 Diabetes |
| 4099651  | Type 2 diabetes mellitus with ulcer                                                                    | Type 2 Diabetes |
| 45770881 | Moderate nonproliferative retinopathy due to type 2 diabetes mellitus                                  | Type 2 Diabetes |
| 37016768 | Autonomic neuropathy due to type 2 diabetes mellitus                                                   | Type 2 Diabetes |
| 192279   | Disorder of kidney due to diabetes mellitus                                                            | Type 2 Diabetes |
| 378743   | Mild nonproliferative retinopathy due to diabetes mellitus                                             | Type 2 Diabetes |
| 4044391  | Neuropathy due to diabetes mellitus                                                                    | Type 2 Diabetes |
| 4131908  | Peripheral angiopathy due to diabetes mellitus                                                         | Type 2 Diabetes |
| 201530   | Hyperosmolar coma due to type 2 diabetes mellitus                                                      | Type 2 Diabetes |
| 4222876  | Gangrene due to type 2 diabetes mellitus                                                               | Type 2 Diabetes |
| 43531616 | Dermopathy due to type 2 diabetes mellitus                                                             | Type 2 Diabetes |
| 443730   | Disorder of nervous system due to diabetes mellitus                                                    | Type 2 Diabetes |
| 377552   | Moderate nonproliferative retinopathy due to diabetes mellitus                                         | Type 2 Diabetes |
| 43530656 | Nonproliferative retinopathy due to type 2 diabetes mellitus                                           | Type 2 Diabetes |
| 4198296  | Type 2 diabetes mellitus with neuropathic arthropathy                                                  | Type 2 Diabetes |
| 443238   | Diabetic - poor control                                                                                | Type 2 Diabetes |
| 4221495  | Cataract due to diabetes mellitus type 2                                                               | Type 2 Diabetes |
| 443767   | Disorder of eye due to diabetes mellitus                                                               | Type 2 Diabetes |
| 4174977  | Retinopathy due to diabetes mellitus                                                                   | Type 2 Diabetes |
| 4222415  | Mononeuropathy due to type 2 diabetes mellitus                                                         | Type 2 Diabetes |
| 4290822  | Severe nonproliferative retinopathy with clinically significant macular edema due to diabetes mellitus | Type 2 Diabetes |
| 4159742  | Diabetic foot ulcer                                                                                    | Type 2 Diabetes |
| 443735   | Coma due to diabetes mellitus                                                                          | Type 2 Diabetes |
| 321822   | Peripheral vascular disorder due to diabetes mellitus                                                  | Type 2 Diabetes |
| 4202383  | Drug-induced diabetes mellitus                                                                         | Type 2 Diabetes |
| 4311708  | Diabetic peripheral neuropathy                                                                         | Type 2 Diabetes |
| 376114   | Severe nonproliferative retinopathy due to diabetes mellitus                                           | Type 2 Diabetes |
| 4029420  | Severe hyperglycemia due to diabetes mellitus                                                          | Type 2 Diabetes |
| 376979   | Cataract due to diabetes mellitus                                                                      | Type 2 Diabetes |
| 4196141  | Arthropathy due to type 2 diabetes mellitus                                                            | Type 2 Diabetes |
| 4266637  | Severe nonproliferative retinopathy without macular edema due to diabetes mellitus                     | Type 2 Diabetes |
| 4175440  | Autonomic neuropathy due to diabetes mellitus                                                          | Type 2 Diabetes |
| 443727   | Diabetic ketoacidosis                                                                                  | Type 2 Diabetes |
| 43530689 | Peripheral neuropathy due to type 2 diabetes mellitus                                                  | Type 2 Diabetes |
| 4140466  | Lumbosacral radiculoplexus neuropathy due to type 2 diabetes mellitus                                  | Type 2 Diabetes |
| 4029423  | Hypoglycemia due to diabetes mellitus                                                                  | Type 2 Diabetes |
| 43531564 | Dyslipidemia due to type 2 diabetes mellitus                                                           | Type 2 Diabetes |
| 4304377  | Type 2 diabetes mellitus in obese                                                                      | Type 2 Diabetes |
| 4048028  | Diabetic mononeuropathy                                                                                | Type 2 Diabetes |
| 4200875  | Type 2 diabetes mellitus with peripheral angiopathy                                                    | Type 2 Diabetes |
| 40480000 | Multiple complications due to diabetes mellitus                                                        | Type 2 Diabetes |
| 4130162  | Insulin treated type 2 diabetes mellitus                                                               | Type 2 Diabetes |
| 4247107  | O/E - right eye background diabetic retinopathy                                                        | Type 2 Diabetes |
| 4227657  | Skin ulcer due to diabetes mellitus                                                                    | Type 2 Diabetes |
| 4235260  | O/E - left eye background diabetic retinopathy                                                         | Type 2 Diabetes |
| 4033942  | Diabetic dermopathy                                                                                    | Type 2 Diabetes |
| 36714116 | Hypoglycemic coma due to type 2 diabetes mellitus                                                      | Type 2 Diabetes |
| 4114427  | Neuropathic arthropathy due to diabetes mellitus                                                       | Type 2 Diabetes |
| 4226354  | Gangrene due to diabetes mellitus                                                                      | Type 2 Diabetes |
| 4137220  | Diabetic glomerulonephritis                                                                            | Type 2 Diabetes |
| 4226238  | Hyperosmolar coma due to diabetes mellitus                                                             | Type 2 Diabetes |
| 4095288  | Ketoacidotic coma due to diabetes mellitus                                                             | Type 2 Diabetes |
| 45773064 | Traction detachment of retina due to type 2 diabetes mellitus                                          | Type 2 Diabetes |



## SUPPORTING INFORMATION Newby 2022 Metformin versus sulfonylureas on Dementia and Parkinson's risk

|          |                                                                                  |                 |
|----------|----------------------------------------------------------------------------------|-----------------|
| 4234742  | Diabetic neuropathy with neurologic complication                                 | Type 2 Diabetes |
| 4191611  | Lumbosacral radiculoplexus neuropathy due to diabetes mellitus                   | Type 2 Diabetes |
| 35626038 | Mild nonproliferative retinopathy of right eye due to diabetes mellitus          | Type 2 Diabetes |
| 193323   | Neonatal diabetes mellitus                                                       | Type 2 Diabetes |
| 45757474 | Diabetes mellitus type 2 without retinopathy                                     | Type 2 Diabetes |
| 4099216  | Multiple complications due to type 2 diabetes mellitus                           | Type 2 Diabetes |
| 35626039 | Mild nonproliferative retinopathy of left eye due to diabetes mellitus           | Type 2 Diabetes |
| 4128221  | Microalbuminuric diabetic nephropathy                                            | Type 2 Diabetes |
| 4230254  | Type 2 diabetes mellitus in nonobese                                             | Type 2 Diabetes |
| 4255401  | O/E - right eye proliferative diabetic retinopathy                               | Type 2 Diabetes |
| 37017430 | Gastroparesis due to diabetes mellitus                                           | Type 2 Diabetes |
| 4252356  | O/E - left eye proliferative diabetic retinopathy                                | Type 2 Diabetes |
| 4334884  | Disorder of macula due to diabetes mellitus                                      | Type 2 Diabetes |
| 4063043  | Pre-existing type 2 diabetes mellitus                                            | Type 2 Diabetes |
| 4226121  | Retinopathy due to type 2 diabetes mellitus                                      | Type 2 Diabetes |
| 4226798  | Hypoglycemic coma due to diabetes mellitus                                       | Type 2 Diabetes |
| 4327944  | Malnutrition related diabetes mellitus                                           | Type 2 Diabetes |
| 37016358 | Moderate nonproliferative retinopathy due to secondary diabetes mellitus         | Type 2 Diabetes |
| 43531653 | Chronic kidney disease stage 3 due to type 2 diabetes mellitus                   | Type 2 Diabetes |
| 4228443  | Ketoacidotic coma due to type 2 diabetes mellitus                                | Type 2 Diabetes |
| 4030664  | Proteinuric nephropathy due to diabetes mellitus                                 | Type 2 Diabetes |
| 4177050  | Erectile dysfunction due to type 2 diabetes mellitus                             | Type 2 Diabetes |
| 45770880 | Hyperlipidemia due to type 2 diabetes mellitus                                   | Type 2 Diabetes |
| 4221487  | Persistent microalbuminuria due to type 2 diabetes mellitus                      | Type 2 Diabetes |
| 4099334  | Steroid-induced diabetes                                                         | Type 2 Diabetes |
| 35626041 | Moderate nonproliferative diabetic retinopathy of right eye                      | Type 2 Diabetes |
| 35626042 | Moderate nonproliferative diabetic retinopathy of left eye                       | Type 2 Diabetes |
| 37016355 | Hyperosmolar coma due to secondary diabetes mellitus                             | Type 2 Diabetes |
| 4087682  | Diabetic foot                                                                    | Type 2 Diabetes |
| 4105639  | Chronic painful neuropathy due to diabetes mellitus                              | Type 2 Diabetes |
| 43531566 | Chronic kidney disease stage 2 due to type 2 diabetes mellitus                   | Type 2 Diabetes |
| 4223739  | Persistent proteinuria due to type 2 diabetes mellitus                           | Type 2 Diabetes |
| 37018728 | Gastroparesis due to type 2 diabetes mellitus                                    | Type 2 Diabetes |
| 4255399  | O/E - right eye preproliferative diabetic retinopathy                            | Type 2 Diabetes |
| 4255400  | O/E - left eye preproliferative diabetic retinopathy                             | Type 2 Diabetes |
| 4212441  | O/E - right eye stable treated proliferative diabetic retinopathy                | Type 2 Diabetes |
| 4215961  | O/E - left eye stable treated proliferative diabetic retinopathy                 | Type 2 Diabetes |
| 43531577 | Chronic kidney disease stage 4 due to type 2 diabetes mellitus                   | Type 2 Diabetes |
| 35626043 | Severe nonproliferative retinopathy of right eye due to diabetes mellitus        | Type 2 Diabetes |
| 35626044 | Severe nonproliferative retinopathy of left eye due to diabetes mellitus         | Type 2 Diabetes |
| 4105172  | Preproliferative retinopathy due to diabetes mellitus                            | Type 2 Diabetes |
| 4105173  | Advanced maculopathy due to diabetes mellitus                                    | Type 2 Diabetes |
| 4034964  | Abnormal metabolic state due to diabetes mellitus                                | Type 2 Diabetes |
| 43531006 | Maturity onset diabetes of the young, type 1                                     | Type 2 Diabetes |
| 4096042  | Malnutrition-related diabetes mellitus without complications                     | Type 2 Diabetes |
| 4171406  | Infection of foot due to diabetes mellitus                                       | Type 2 Diabetes |
| 4209538  | Advanced retinal disease due to diabetes mellitus                                | Type 2 Diabetes |
| 37016356 | Mild nonproliferative retinopathy due to secondary diabetes mellitus             | Type 2 Diabetes |
| 4016047  | Loss of hypoglycemic warning due to diabetes mellitus                            | Type 2 Diabetes |
| 4061725  | Cellulitis of foot due to diabetes mellitus                                      | Type 2 Diabetes |
| 4065354  | Neuropathic ulcer of foot due to diabetes mellitus                               | Type 2 Diabetes |
| 43531640 | Maturity-onset diabetes of the young                                             | Type 2 Diabetes |
| 40482458 | Macroalbuminuric nephropathy due to diabetes mellitus                            | Type 2 Diabetes |
| 37016354 | Neuropathy due to type 2 diabetes mellitus                                       | Type 2 Diabetes |
| 4130164  | Maturity onset diabetes of the young, type 2                                     | Type 2 Diabetes |
| 4338901  | Traction detachment of retina due to diabetes mellitus                           | Type 2 Diabetes |
| 4099652  | Multiple complications due to malnutrition related diabetes                      | Type 2 Diabetes |
| 4063569  | Ischemic ulcer of foot due to diabetes mellitus                                  | Type 2 Diabetes |
| 4129524  | Insulin resistance - type A                                                      | Type 2 Diabetes |
| 37110593 | Lesion of skin due to diabetes mellitus                                          | Type 2 Diabetes |
| 4206115  | Glomerulopathy due to diabetes mellitus                                          | Type 2 Diabetes |
| 45757449 | Ulcer of toe due to type 2 diabetes mellitus                                     | Type 2 Diabetes |
| 4027121  | Nephrotic syndrome due to diabetes mellitus                                      | Type 2 Diabetes |
| 4096671  | Malnutrition-related diabetes mellitus with peripheral circulatory complications | Type 2 Diabetes |
| 40480031 | Hyperglycemic crisis due to diabetes mellitus                                    | Type 2 Diabetes |
| 4101478  | Microaneurysm of retinal artery due to diabetes mellitus                         | Type 2 Diabetes |
| 35626067 | Macular edema of right eye due to diabetes mellitus                              | Type 2 Diabetes |
| 4178452  | Diabetes mellitus associated with pancreatic disease                             | Type 2 Diabetes |

## SUPPORTING INFORMATION Newby 2022 Metformin versus sulfonylureas on Dementia and Parkinson's risk

|          |                                                                                |                 |
|----------|--------------------------------------------------------------------------------|-----------------|
| 4054812  | Mixed sensorimotor polyneuropathy due to diabetes mellitus                     | Type 2 Diabetes |
| 43531559 | Chronic kidney disease stage 1 due to type 2 diabetes mellitus                 | Type 2 Diabetes |
| 35626068 | Macular edema of left eye due to diabetes mellitus                             | Type 2 Diabetes |
| 4192852  | Diabetes mellitus due to insulin receptor antibodies                           | Type 2 Diabetes |
| 37016350 | Dermatitis due to drug induced diabetes mellitus                               | Type 2 Diabetes |
| 45757278 | Peripheral sensory neuropathy due to type 2 diabetes mellitus                  | Type 2 Diabetes |
| 4215719  | Hyperosmolar non-ketotic state due to type 2 diabetes mellitus                 | Type 2 Diabetes |
| 4143529  | Diabetes mellitus associated with cystic fibrosis                              | Type 2 Diabetes |
| 43531651 | Mixed hyperlipidemia due to type 2 diabetes mellitus                           | Type 2 Diabetes |
| 4096670  | Malnutrition-related diabetes mellitus with renal complications                | Type 2 Diabetes |
| 4224879  | Disorder of nervous system due to malnutrition related diabetes mellitus       | Type 2 Diabetes |
| 45766050 | Diabetes mellitus in remission                                                 | Type 2 Diabetes |
| 4131117  | Sensory neuropathy due to diabetes mellitus                                    | Type 2 Diabetes |
| 4221933  | Coma due to malnutrition-related diabetes mellitus                             | Type 2 Diabetes |
| 4114426  | Diabetic hand syndrome                                                         | Type 2 Diabetes |
| 4129520  | Nocturnal hypoglycemia due to diabetes mellitus                                | Type 2 Diabetes |
| 4105016  | Acute painful diabetic neuropathy                                              | Type 2 Diabetes |
| 4096041  | Malnutrition-related diabetes mellitus with ketoacidosis                       | Type 2 Diabetes |
| 45771064 | Hypertension in chronic kidney disease due to type 2 diabetes mellitus         | Type 2 Diabetes |
| 36712670 | Skin ulcer due to type 2 diabetes mellitus                                     | Type 2 Diabetes |
| 4169240  | Bullosis diabeticorum                                                          | Type 2 Diabetes |
| 4224419  | Disorder of eye due to malnutrition related diabetes mellitus                  | Type 2 Diabetes |
| 4101887  | Mononeuritis multiplex with diabetes mellitus                                  | Type 2 Diabetes |
| 43531562 | Chronic kidney disease stage 5 due to type 2 diabetes mellitus                 | Type 2 Diabetes |
| 4189418  | Radiculoplexus neuropathy due to diabetes mellitus                             | Type 2 Diabetes |
| 45769905 | Microalbuminuria due to type 2 diabetes mellitus                               | Type 2 Diabetes |
| 4147719  | Hyperosmolar non-ketotic state due to diabetes mellitus                        | Type 2 Diabetes |
| 45772060 | Hypoglycemia unawareness due to type 2 diabetes mellitus                       | Type 2 Diabetes |
| 4029422  | Hypoglycemic event due to diabetes                                             | Type 2 Diabetes |
| 4062687  | Pre-existing malnutrition-related diabetes mellitus                            | Type 2 Diabetes |
| 4144583  | Diabetes mellitus due to cystic fibrosis                                       | Type 2 Diabetes |
| 4307799  | Anemia due to diabetes mellitus                                                | Type 2 Diabetes |
| 4223463  | Exudative maculopathy due to type 2 diabetes mellitus                          | Type 2 Diabetes |
| 43531012 | Maturity-onset diabetes of the young, type 3                                   | Type 2 Diabetes |
| 4321756  | Acanthosis nigricans due to type 2 diabetes mellitus                           | Type 2 Diabetes |
| 45766052 | Type II diabetes mellitus in remission                                         | Type 2 Diabetes |
| 43531014 | Maturity-onset diabetes of the young, type 5                                   | Type 2 Diabetes |
| 4142579  | Small vessel disease due to type 2 diabetes mellitus                           | Type 2 Diabetes |
| 4245270  | Diabetes mellitus associated with genetic syndrome                             | Type 2 Diabetes |
| 4030061  | Malnutrition-related diabetes mellitus - fibrocalculous                        | Type 2 Diabetes |
| 4176925  | Ophthalmoplegia due to diabetes mellitus                                       | Type 2 Diabetes |
| 4294429  | Wet gangrene of foot due to diabetes mellitus                                  | Type 2 Diabetes |
| 45757447 | Hypertension in chronic kidney disease stage 2 due to type 2 diabetes mellitus | Type 2 Diabetes |
| 4195043  | High risk proliferative retinopathy due to diabetes mellitus                   | Type 2 Diabetes |
| 43531588 | Angina associated with type 2 diabetes mellitus                                | Type 2 Diabetes |
| 4265913  | Pretibial pigmental patches due to diabetes mellitus                           | Type 2 Diabetes |
| 45757446 | Hypertension in chronic kidney disease stage 3 due to type 2 diabetes mellitus | Type 2 Diabetes |
| 40482883 | Posttransplant diabetes mellitus                                               | Type 2 Diabetes |
| 45757499 | Proteinuria due to type 2 diabetes mellitus                                    | Type 2 Diabetes |
| 45772914 | Glomerulosclerosis of kidney due to diabetes mellitus                          | Type 2 Diabetes |
| 4322638  | Diabetes mellitus AND insipidus with optic atrophy AND deafness                | Type 2 Diabetes |
| 4252384  | Insulin autoimmune syndrome                                                    | Type 2 Diabetes |
| 4235410  | Diabetes mellitus induced by non-steroid drugs                                 | Type 2 Diabetes |
| 4136889  | Diabetes mellitus induced by non-steroid drugs without complication            | Type 2 Diabetes |
| 45769906 | End stage renal disease on dialysis due to type 2 diabetes mellitus            | Type 2 Diabetes |
| 4242528  | Diarrhea due to diabetes mellitus                                              | Type 2 Diabetes |
| 4237068  | Diabetes mellitus due to structurally abnormal insulin                         | Type 2 Diabetes |
| 4194970  | Asymmetric proximal motor neuropathy due to diabetes mellitus                  | Type 2 Diabetes |
| 4101892  | Asymptomatic neuropathy due to diabetes mellitus                               | Type 2 Diabetes |
| 4307319  | Symmetric proximal motor neuropathy due to diabetes mellitus                   | Type 2 Diabetes |
| 45757077 | Diabetes mellitus due to pancreatic injury                                     | Type 2 Diabetes |
| 43531013 | Maturity-onset diabetes of the young, type 4                                   | Type 2 Diabetes |
| 4099653  | Steroid-induced diabetes mellitus without complication                         | Type 2 Diabetes |
| 45757277 | Ulcer of lower limb due to type 2 diabetes mellitus                            | Type 2 Diabetes |
| 45770831 | Proliferative retinopathy with retinal edema due to type 2 diabetes mellitus   | Type 2 Diabetes |
| 45757445 | Hypertension in chronic kidney disease stage 4 due to type 2 diabetes mellitus | Type 2 Diabetes |

## SUPPORTING INFORMATION Newby 2022 Metformin versus sulfonylureas on Dementia and Parkinson's risk

|          |                                                                                                                                         |                 |
|----------|-----------------------------------------------------------------------------------------------------------------------------------------|-----------------|
| 45763582 | Blindness due to type 2 diabetes mellitus                                                                                               | Type 2 Diabetes |
| 45772019 | Glaucoma due to type 2 diabetes mellitus                                                                                                | Type 2 Diabetes |
| 45770928 | Retinal edema due to type 2 diabetes mellitus                                                                                           | Type 2 Diabetes |
| 45770883 | Neuropathic ulcer of toe due to type 2 diabetes mellitus                                                                                | Type 2 Diabetes |
| 45770832 | Stasis ulcer due to type 2 diabetes mellitus                                                                                            | Type 2 Diabetes |
| 45769894 | Cranial nerve palsy due to type 2 diabetes mellitus                                                                                     | Type 2 Diabetes |
| 45769888 | Ankle ulcer due to type 2 diabetes mellitus                                                                                             | Type 2 Diabetes |
| 45769875 | Insulin reactive hypoglycemia due to type 2 diabetes mellitus                                                                           | Type 2 Diabetes |
| 45769836 | Osteomyelitis due to type 2 diabetes mellitus                                                                                           | Type 2 Diabetes |
| 45769828 | Nephrotic syndrome due to type 2 diabetes mellitus                                                                                      | Type 2 Diabetes |
| 45757444 | Hypertension in chronic kidney disease stage 5 due to type 2 diabetes mellitus                                                          | Type 2 Diabetes |
| 45757075 | Ischemia of retina due to type 2 diabetes mellitus                                                                                      | Type 2 Diabetes |
| 43531608 | Vitreous hemorrhage due to type 2 diabetes mellitus                                                                                     | Type 2 Diabetes |
| 43531018 | Maturity-onset diabetes of the young, type 11                                                                                           | Type 2 Diabetes |
| 37018912 | Diabetic hand syndrome due to type 2 diabetes mellitus                                                                                  | Type 2 Diabetes |
| 37017221 | Neovascular glaucoma due to diabetes mellitus                                                                                           | Type 2 Diabetes |
| 37016357 | Non-proliferative retinopathy due to secondary diabetes mellitus                                                                        | Type 2 Diabetes |
| 36717156 | Acidosis due to type 2 diabetes mellitus                                                                                                | Type 2 Diabetes |
| 35626088 | Disorder of left macula due to diabetes mellitus                                                                                        | Type 2 Diabetes |
| 35626087 | Disorder of right macula due to diabetes mellitus                                                                                       | Type 2 Diabetes |
| 35626072 | Clinically significant macular edema of left eye due to diabetes mellitus                                                               | Type 2 Diabetes |
| 35626071 | Clinically significant macular edema of right eye due to diabetes mellitus                                                              | Type 2 Diabetes |
| 4338900  | Proliferative retinopathy with optic disc neovascularization due to diabetes mellitus                                                   | Type 2 Diabetes |
| 4304701  | Mononeuropathy simplex due to diabetes mellitus                                                                                         | Type 2 Diabetes |
| 4270049  | Nodular type diabetic glomerulosclerosis                                                                                                | Type 2 Diabetes |
| 4269870  | Non-high-risk proliferative retinopathy with clinically significant macular edema due to diabetes mellitus                              | Type 2 Diabetes |
| 4263090  | Femoral mononeuropathy due to diabetes mellitus                                                                                         | Type 2 Diabetes |
| 4262282  | Diabetic mononeuropathy multiplex                                                                                                       | Type 2 Diabetes |
| 4240589  | Diabetes mellitus associated with hormonal etiology                                                                                     | Type 2 Diabetes |
| 4218499  | O/E - sight threatening diabetic retinopathy                                                                                            | Type 2 Diabetes |
| 4210874  | Ischemic maculopathy due to diabetes mellitus                                                                                           | Type 2 Diabetes |
| 4210872  | Focal exudative maculopathy due to diabetes mellitus                                                                                    | Type 2 Diabetes |
| 4210129  | Quiescent proliferative retinopathy due to diabetes mellitus                                                                            | Type 2 Diabetes |
| 4210128  | Non-high-risk proliferative retinopathy due to diabetes mellitus                                                                        | Type 2 Diabetes |
| 4199039  | Diffuse exudative maculopathy due to diabetes mellitus                                                                                  | Type 2 Diabetes |
| 4195045  | Vitreous hemorrhage due to diabetes mellitus                                                                                            | Type 2 Diabetes |
| 4195044  | Proliferative retinopathy with iris neovascularization due to diabetes mellitus                                                         | Type 2 Diabetes |
| 4178790  | Diabetes mellitus associated with receptor abnormality                                                                                  | Type 2 Diabetes |
| 4164632  | Very severe proliferative retinopathy due to diabetes mellitus                                                                          | Type 2 Diabetes |
| 4164175  | Diabetic intraretinal microvascular anomaly                                                                                             | Type 2 Diabetes |
| 4164174  | High risk proliferative retinopathy without macular edema due to diabetes mellitus                                                      | Type 2 Diabetes |
| 4162095  | Macular edema not clinically significant due to diabetes mellitus                                                                       | Type 2 Diabetes |
| 4161670  | Venous beading of retina due to diabetes mellitus                                                                                       | Type 2 Diabetes |
| 4151453  | Diabetic optic papillopathy                                                                                                             | Type 2 Diabetes |
| 4147577  | Intracapillary glomerulosclerosis of kidney due to diabetes mellitus                                                                    | Type 2 Diabetes |
| 4147504  | Myasthenic syndrome due to diabetic amyotrophy                                                                                          | Type 2 Diabetes |
| 4140808  | Rabson-Mendenhall syndrome                                                                                                              | Type 2 Diabetes |
| 4131907  | Lipoatrophic diabetes                                                                                                                   | Type 2 Diabetes |
| 4102176  | Iritis due to diabetes mellitus                                                                                                         | Type 2 Diabetes |
| 4084643  | Extreme insulin resistance with acanthosis nigricans, hirsutism AND abnormal insulin receptors                                          | Type 2 Diabetes |
| 4082346  | Disorder of soft tissue due to diabetes mellitus                                                                                        | Type 2 Diabetes |
| 4048029  | Thoracic radiculopathy due to diabetes mellitus                                                                                         | Type 2 Diabetes |
| 4044393  | Asymmetric polyneuropathy due to diabetes mellitus                                                                                      | Type 2 Diabetes |
| 4034962  | Hyperproinsulinemia                                                                                                                     | Type 2 Diabetes |
| 4034960  | Secondary endocrine diabetes mellitus                                                                                                   | Type 2 Diabetes |
| 4006979  | Leprechaunism syndrome                                                                                                                  | Type 2 Diabetes |
| 761053   | Severe nonproliferative retinopathy due to diabetes mellitus type 2                                                                     | Type 2 Diabetes |
| 44793114 | Pre-existing diabetes mellitus                                                                                                          | Type 2 Diabetes |
| 46274096 | Gingivitis co-occurrent with diabetes mellitus                                                                                          | Type 2 Diabetes |
| 45771072 | Ischemic ulcer of foot due to type 2 diabetes mellitus                                                                                  | Type 2 Diabetes |
| 45769890 | Ulcer of forefoot due to type 2 diabetes mellitus                                                                                       | Type 2 Diabetes |
| 45757450 | Neuropathic ulcer of foot due to type 2 diabetes mellitus                                                                               | Type 2 Diabetes |
| 45757280 | Dyslipidemia with high density lipoprotein below reference range and triglyceride above reference range due to type 2 diabetes mellitus | Type 2 Diabetes |

## SUPPORTING INFORMATION Newby 2022 Metformin versus sulfonylureas on Dementia and Parkinson's risk

|          |                                                                                                             |                 |
|----------|-------------------------------------------------------------------------------------------------------------|-----------------|
| 45757065 | Proliferative retinopathy following surgery due to diabetes mellitus                                        | Type 2 Diabetes |
| 44809809 | Hypoglycaemic warning absent                                                                                | Type 2 Diabetes |
| 44793113 | Diabetes mellitus with multiple complications                                                               | Type 2 Diabetes |
| 44792134 | Maternally inherited diabetes mellitus                                                                      | Type 2 Diabetes |
| 43531644 | Maturity-onset diabetes of the young, type 8                                                                | Type 2 Diabetes |
| 43531597 | Disorder due to well controlled type 2 diabetes mellitus                                                    | Type 2 Diabetes |
| 43531563 | Neuropathic arthropathy due to type 2 diabetes mellitus                                                     | Type 2 Diabetes |
| 43531020 | Diabetes mellitus, transient neonatal 3                                                                     | Type 2 Diabetes |
| 43531019 | Diabetes mellitus, transient neonatal 2                                                                     | Type 2 Diabetes |
| 43531016 | Maturity-onset diabetes of the young, type 9                                                                | Type 2 Diabetes |
| 43020791 | Gestational diabetes mellitus uncontrolled                                                                  | Type 2 Diabetes |
| 42538715 | Acute complication due to diabetes mellitus                                                                 | Type 2 Diabetes |
| 42537681 | Diabetes mellitus caused by chemical                                                                        | Type 2 Diabetes |
| 42536605 | Metabolic acidosis due to diabetes mellitus                                                                 | Type 2 Diabetes |
| 42536604 | Lactic acidosis due to diabetes mellitus                                                                    | Type 2 Diabetes |
| 42536603 | Hyperosmolar hyperglycemic coma due to diabetes mellitus without ketoacidosis                               | Type 2 Diabetes |
| 42536400 | Absence of lower limb due to diabetes mellitus                                                              | Type 2 Diabetes |
| 37116379 | Stimmler syndrome                                                                                           | Type 2 Diabetes |
| 37110068 | Diabetic mastopathy                                                                                         | Type 2 Diabetes |
| 36716258 | Pancreatic hypoplasia, diabetes mellitus, congenital heart disease syndrome                                 | Type 2 Diabetes |
| 36713275 | Atypical diabetes mellitus                                                                                  | Type 2 Diabetes |
| 36712687 | Ulcer of right foot due to type 2 diabetes mellitus                                                         | Type 2 Diabetes |
| 36712686 | Ulcer of left foot due to type 2 diabetes mellitus                                                          | Type 2 Diabetes |
| 4336000  | Proliferative retinopathy with neovascularization elsewhere than the optic disc due to diabetes mellitus    | Type 2 Diabetes |
| 4290823  | Very severe nonproliferative retinopathy with clinically significant macular edema due to diabetes mellitus | Type 2 Diabetes |
| 4266042  | High risk proliferative retinopathy with clinically significant macula edema due to diabetes mellitus       | Type 2 Diabetes |
| 4266041  | Visually threatening diabetic retinopathy                                                                   | Type 2 Diabetes |
| 4243625  | Diffuse glomerulosclerosis of kidney due to diabetes mellitus                                               | Type 2 Diabetes |
| 4223734  | Non-ketotic non-hyperosmolar coma due to diabetes mellitus                                                  | Type 2 Diabetes |
| 4221962  | Very severe nonproliferative retinopathy without macular edema due to diabetes mellitus                     | Type 2 Diabetes |
| 4212631  | Protein-deficient diabetes mellitus                                                                         | Type 2 Diabetes |
| 4195498  | Mixed maculopathy due to diabetes mellitus                                                                  | Type 2 Diabetes |
| 4164176  | High risk proliferative retinopathy not amenable to photocoagulation due to diabetes mellitus               | Type 2 Diabetes |
| 4162239  | Somogyi phenomenon                                                                                          | Type 2 Diabetes |
| 4161671  | Non-high-risk proliferative retinopathy with no macular edema due to diabetes mellitus                      | Type 2 Diabetes |
| 4151946  | Kimmelstiel-Wilson syndrome                                                                                 | Type 2 Diabetes |
| 4129525  | Insulin resistance - type B                                                                                 | Type 2 Diabetes |
| 4129516  | Diabetes-deafness syndrome maternally transmitted                                                           | Type 2 Diabetes |
| 4129225  | Motor polyneuropathy due to diabetes mellitus                                                               | Type 2 Diabetes |
| 4099741  | Fibrocalculous pancreatic diabetes                                                                          | Type 2 Diabetes |
| 4082347  | Diabetic thick skin syndrome                                                                                | Type 2 Diabetes |
| 4079850  | Diabetes mellitus in neonate small for gestational age                                                      | Type 2 Diabetes |
| 4046332  | Diabetic acute painful polyneuropathy                                                                       | Type 2 Diabetes |
| 4044392  | Chronic painful polyneuropathy due to diabetes mellitus                                                     | Type 2 Diabetes |
| 4023792  | Pseudotabes due to diabetes mellitus                                                                        | Type 2 Diabetes |
| 1373225  | perindopril                                                                                                 | ACE inhibitors  |
| 1363749  | fosinopril                                                                                                  | ACE inhibitors  |
| 1342439  | trandolapril                                                                                                | ACE inhibitors  |
| 1341927  | enalapril                                                                                                   | ACE inhibitors  |
| 1340128  | captopril                                                                                                   | ACE inhibitors  |
| 1335471  | benazepril                                                                                                  | ACE inhibitors  |
| 1334456  | ramipril                                                                                                    | ACE inhibitors  |
| 1331235  | quinapril                                                                                                   | ACE inhibitors  |
| 1310756  | moexipril                                                                                                   | ACE inhibitors  |
| 1308216  | lisinopril                                                                                                  | ACE inhibitors  |
| 1316354  | bendroflumethiazide                                                                                         | Diuretics       |
| 1376289  | hydroflumethiazide                                                                                          | Diuretics       |
| 907013   | metolazone                                                                                                  | Diuretics       |
| 948787   | polythiazide                                                                                                | Diuretics       |
| 992590   | chlorothiazide                                                                                              | Diuretics       |
| 974166   | hydrochlorothiazide                                                                                         | Diuretics       |
| 905273   | methyclothiazide                                                                                            | Diuretics       |
| 978555   | indapamide                                                                                                  | Diuretics       |
| 1395058  | chlorthalidone                                                                                              | Diuretics       |

## SUPPORTING INFORMATION Newby 2022 Metformin versus sulfonylureas on Dementia and Parkinson's risk

|          |                    |                                     |
|----------|--------------------|-------------------------------------|
| 904639   | trichlormethiazide | Diuretics                           |
| 1346686  | eprosartan         | angiotensin II receptor antagonists |
| 40226742 | olmesartan         | angiotensin II receptor antagonists |
| 40235485 | azilsartan         | angiotensin II receptor antagonists |
| 1308842  | valsartan          | angiotensin II receptor antagonists |
| 1395058  | chlorthalidone     | angiotensin II receptor antagonists |
| 46275719 | sacubitril         | angiotensin II receptor antagonists |
| 1351557  | candesartan        | angiotensin II receptor antagonists |
| 1347384  | irbesartan         | angiotensin II receptor antagonists |
| 1317640  | telmisartan        | angiotensin II receptor antagonists |
| 1367500  | losartan           | angiotensin II receptor antagonists |
| 1332418  | amlodipine         | angiotensin II receptor antagonists |
| 975125   | hydrocortisone     | Glucocorticoids                     |
| 1518254  | dexamethasone      | Glucocorticoids                     |
| 939259   | budesonide         | Glucocorticoids                     |
| 1551099  | prednisone         | Glucocorticoids                     |
| 1507705  | cortisone          | Glucocorticoids                     |
| 920458   | betamethasone      | Glucocorticoids                     |
| 903963   | triamcinolone      | Glucocorticoids                     |
| 1506270  | methylprednisolone | Glucocorticoids                     |
| 1550557  | prednisolone       | Glucocorticoids                     |
| 1111220  | arformoterol       | Beta 2 agonists                     |
| 1123995  | arformoterol       | Beta 2 agonists                     |
| 1138050  | bitolterol         | Beta 2 agonists                     |
| 1154343  | albuterol          | Beta 2 agonists                     |
| 1181809  | isoetharine        | Beta 2 agonists                     |
| 40240664 | indacaterol        | Beta 2 agonists                     |
| 45775116 | olodaterol         | Beta 2 agonists                     |
| 1196677  | formoterol         | Beta 2 agonists                     |
| 1183554  | isoproterenol      | Beta 2 agonists                     |
| 1192218  | levabuterol        | Beta 2 agonists                     |
| 1125449  | pirbuterol         | Beta 2 agonists                     |
| 1137529  | salmeterol         | Beta 2 agonists                     |
| 1236744  | terbutaline        | Beta 2 agonists                     |
| 1146810  | piroxicam          | NSAIDs                              |
| 1195492  | etodolac           | NSAIDs                              |
| 1177480  | ibuprofen          | NSAIDs                              |
| 1197736  | mefenamate         | NSAIDs                              |
| 1189754  | rofecoxib          | NSAIDs                              |
| 1236607  | sulindac           | NSAIDs                              |
| 19025925 | oxyphenbutazone    | NSAIDs                              |
| 1156378  | flurbiprofen       | NSAIDs                              |
| 1150345  | meloxicam          | NSAIDs                              |
| 1178663  | indomethacin       | NSAIDs                              |
| 1118084  | celecoxib          | NSAIDs                              |
| 1124300  | diclofenac         | NSAIDs                              |
| 1136980  | ketorolac          | NSAIDs                              |
| 1129625  | diphenhydramine    | NSAIDs                              |
| 904453   | esomeprazole       | NSAIDs                              |
| 1180182  | meclofenamate      | NSAIDs                              |
| 1153928  | fenoprofen         | NSAIDs                              |
| 953076   | famotidine         | NSAIDs                              |
| 1103374  | valdecoxib         | NSAIDs                              |
| 1115008  | naproxen           | NSAIDs                              |
| 1139179  | bromfenac          | NSAIDs                              |
| 1185922  | ketoprofen         | NSAIDs                              |
| 1135710  | phenylbutazone     | NSAIDs                              |
| 1150871  | misoprostol        | NSAIDs                              |
| 1102917  | tolmetin           | NSAIDs                              |
| 1118045  | oxaprozin          | NSAIDs                              |
| 1113648  | nabumetone         | NSAIDs                              |

## SUPPORTING INFORMATION Newby 2022 Metformin versus sulfonylureas on Dementia and Parkinson's risk

Drug definitions**Table S3. Drug codes of drug ingredients for metformin and sulfonylureas**

| Name                    | RxNorm      | Concept ID |
|-------------------------|-------------|------------|
| Metformin               | 6809        | 1503297    |
| Acetohexamide           | 173         | 1530014    |
| Carbutamide             | 2068        | 37487266   |
| Chlorpropamide          | 2404        | 1594973    |
| Tolazamide              | 10633       | 1502809    |
| Tolbutamide             | 10635       | 1502855    |
| Glibenclamide/glyburide | 4815        | 1559684    |
| Glibornuride            | 102846      | 19001409   |
| Gliclazide              | 4816        | 19059796   |
| Glipizide               | 4821        | 1560171    |
| Gliquidone              | 25793       | 19097821   |
| Glisoxepide             | OMOP2721194 | 40798860   |
| Glycopyramide           | OMOP4819564 | 35198199   |
| Glimepiride             | 25789       | 1597756    |

Concept ID indicates the exact code used in OMOP-CDM based on RxNorm ontologies.

## SUPPORTING INFORMATION Newby 2022 Metformin versus sulfonylureas on Dementia and Parkinson's risk

Covariate Balance plots

Below are the figures showing the covariate balance for all covariates before and after inverse probability treatment weights (IPTW) for age group, ethnic group, renal group and HbA1c group used for sub analysis.

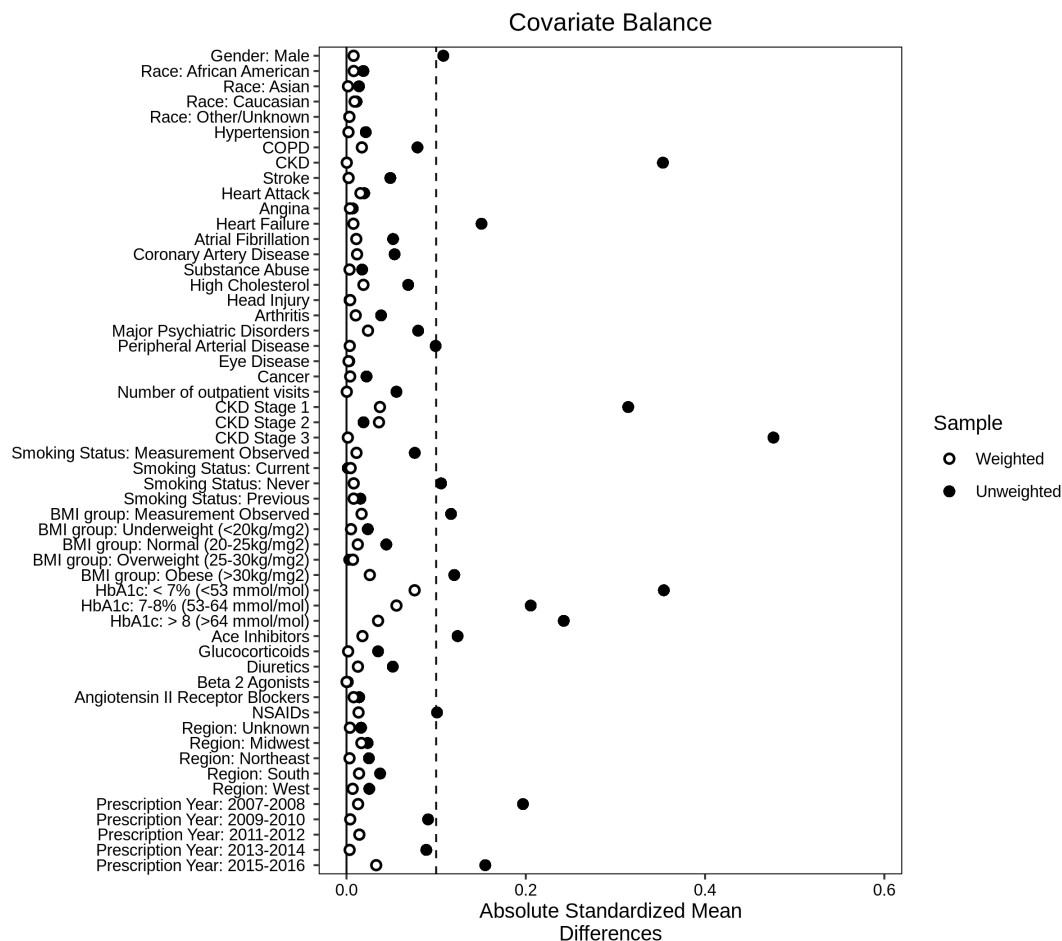

**Figure S1: Standardized difference percentage of covariates before and after IPTW for patients younger than 75 years. Dotted line indicates SMD cut off at 0.1 (10%) where >0.1 indicates difference in covariates between the metformin and sulfonylurea users.**

SUPPORTING INFORMATION Newby 2022 Metformin versus sulfonylureas on Dementia and Parkinson's risk

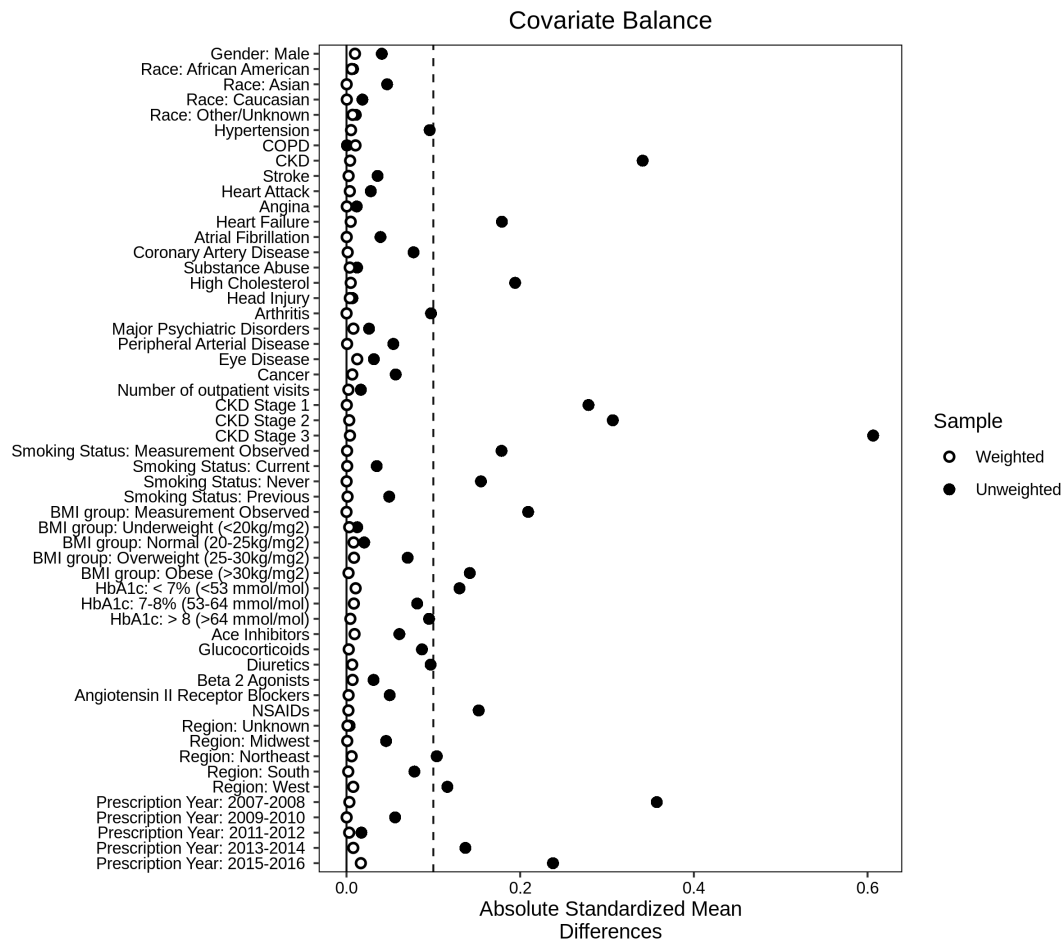

**Figure S2: Standardized difference percentage of covariates before and after IPTW for patients 75 years and older. Dotted line indicates SMD cut off at 0.1 (10%) where >0.1 indicates difference in covariates between the metformin and sulfonylurea users.**



SUPPORTING INFORMATION Newby 2022 Metformin versus sulfonylureas on Dementia and Parkinson's risk

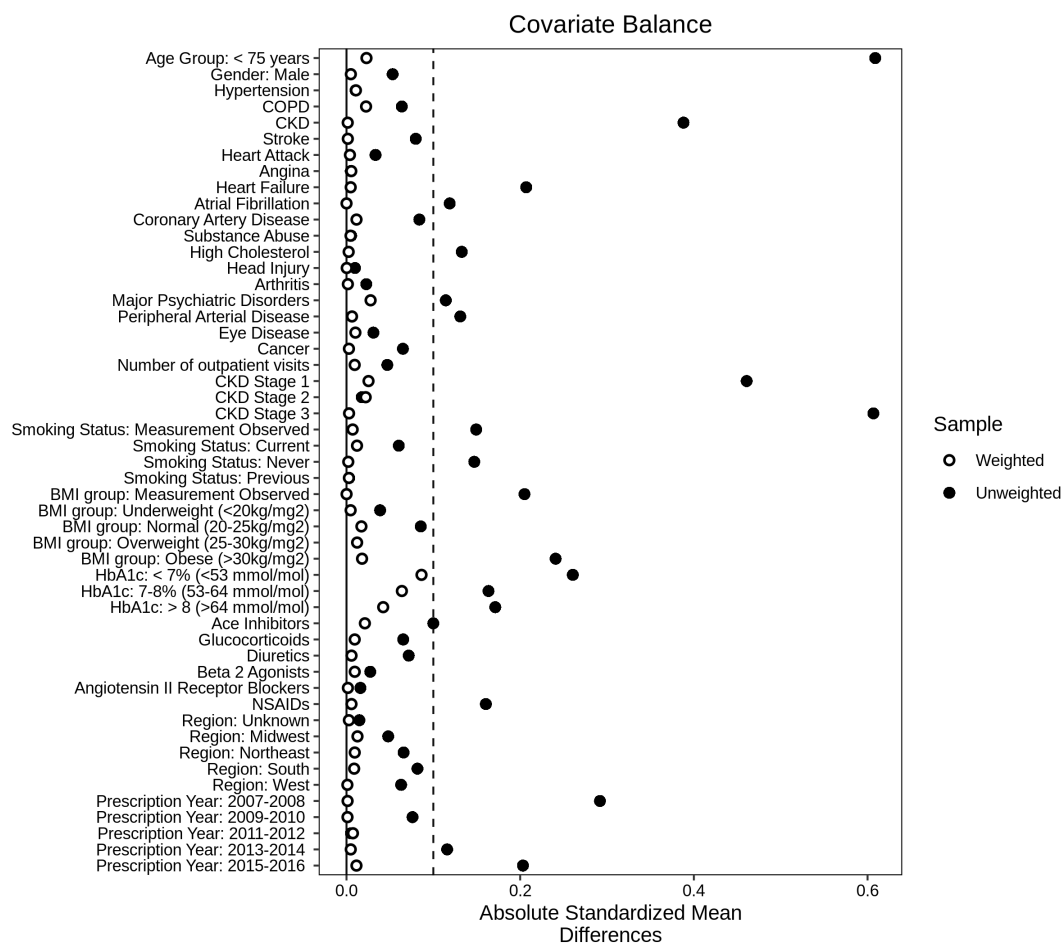

**Figure S3: Standardized difference percentage of covariates before and after IPTW for Caucasian patients. Dotted line indicates SMD cut off at 0.1 (10%) where 0.1 indicates difference in covariates between the metformin and sulfonylurea users.**

SUPPORTING INFORMATION Newby 2022 Metformin versus sulfonylureas on Dementia and Parkinson's risk

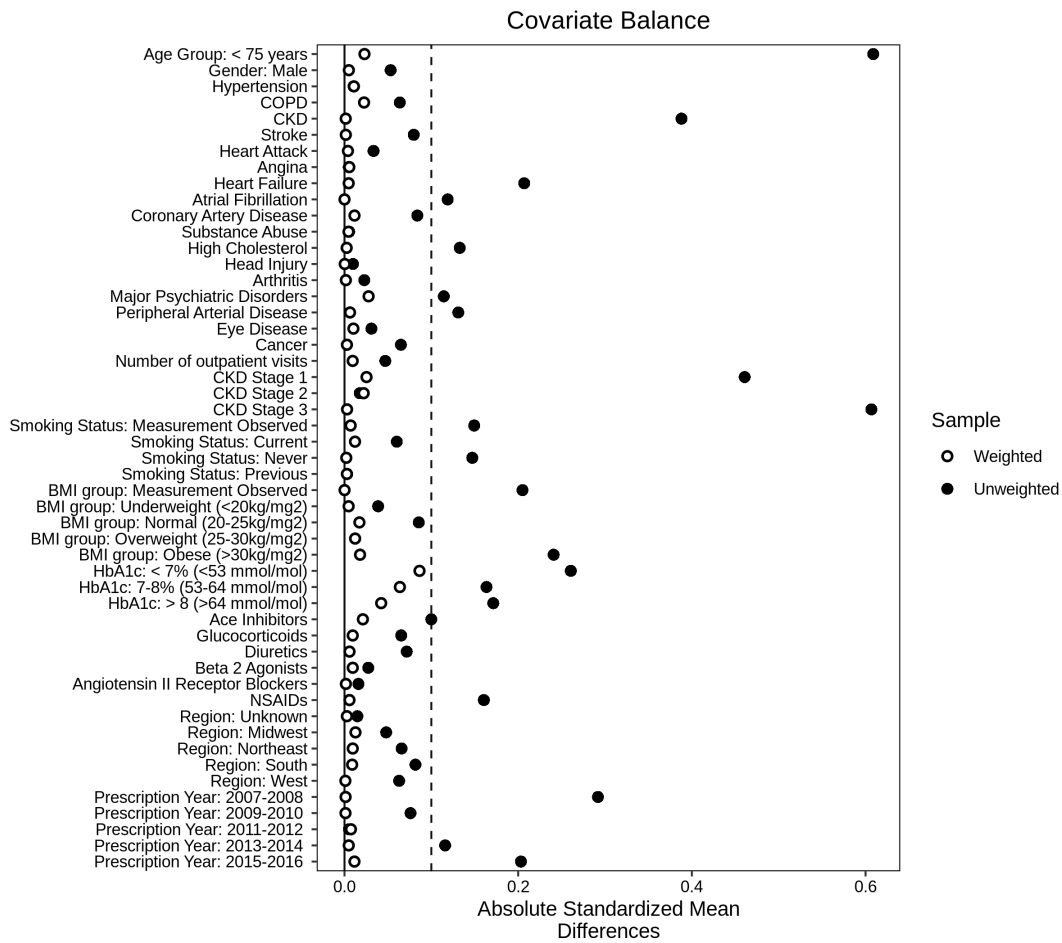

**Figure S4: Standardized difference percentage of covariates before and after IPTW for African American patients. Dotted line indicates SMD cut off at 0.1 (10%) where >0.1 indicates difference in covariates between the metformin and sulfonylurea users.**

SUPPORTING INFORMATION Newby 2022 Metformin versus sulfonylureas on Dementia and Parkinson's risk

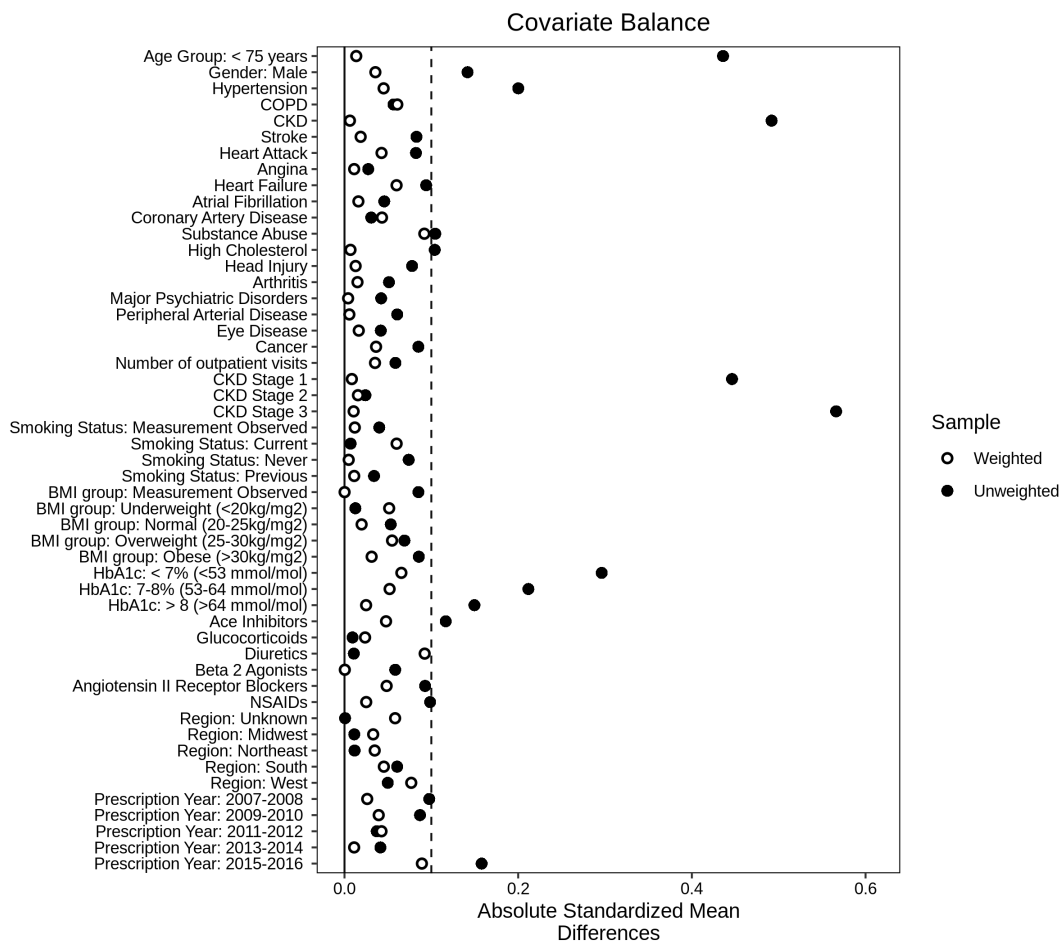

**Figure S5: Standardized difference percentage of covariates before and after IPTW for Asian patients. Dotted line indicates SMD cut off at 0.1 (10%) where >0.1 indicates difference in covariates between the metformin and sulfonylurea users.**

SUPPORTING INFORMATION Newby 2022 Metformin versus sulfonylureas on Dementia and Parkinson's risk

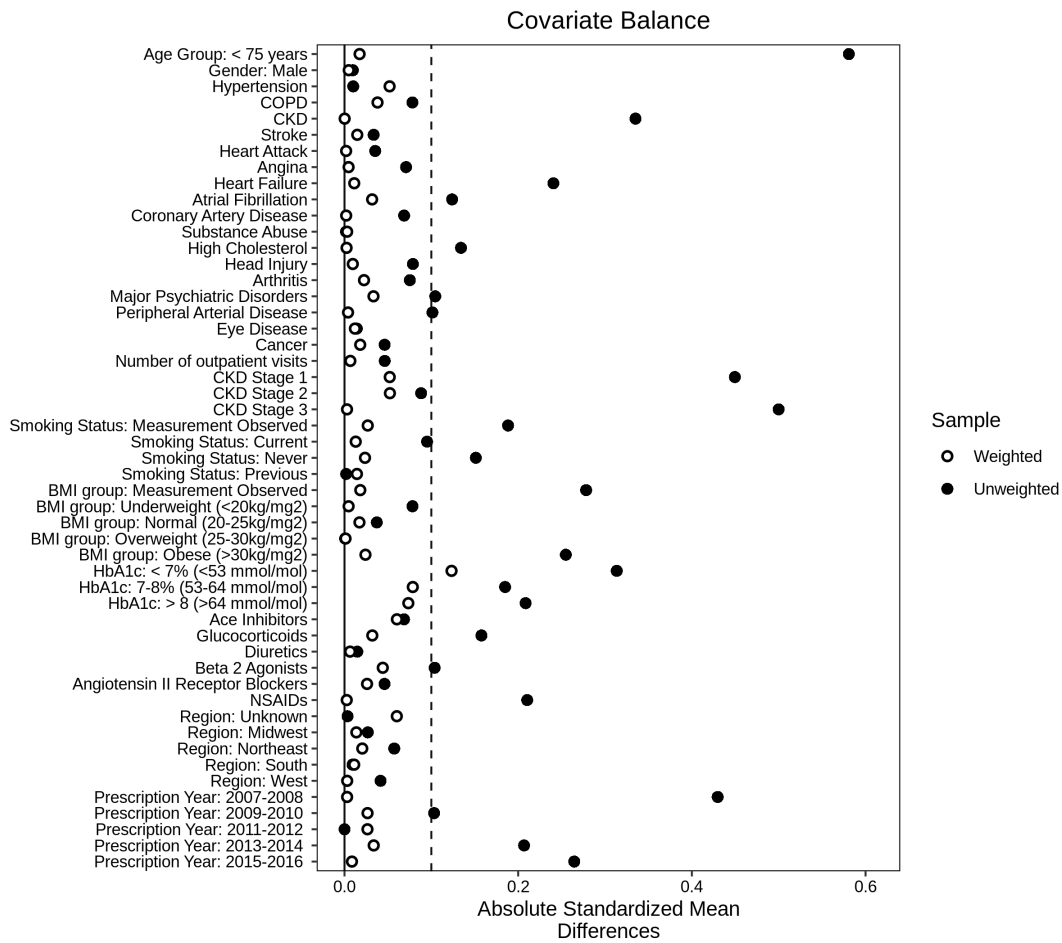

**Figure S6: Standardized difference percentage of covariates before and after IPTW for unknown or other patients. Dotted line indicates SMD cut off at 0.1 (10%) where >0.1 indicates difference in covariates between the metformin and sulfonylurea users. For this analysis HbA1c < 7% was not balanced less than 0.1.**

## SUPPORTING INFORMATION Newby 2022 Metformin versus sulfonylureas on Dementia and Parkinson's risk

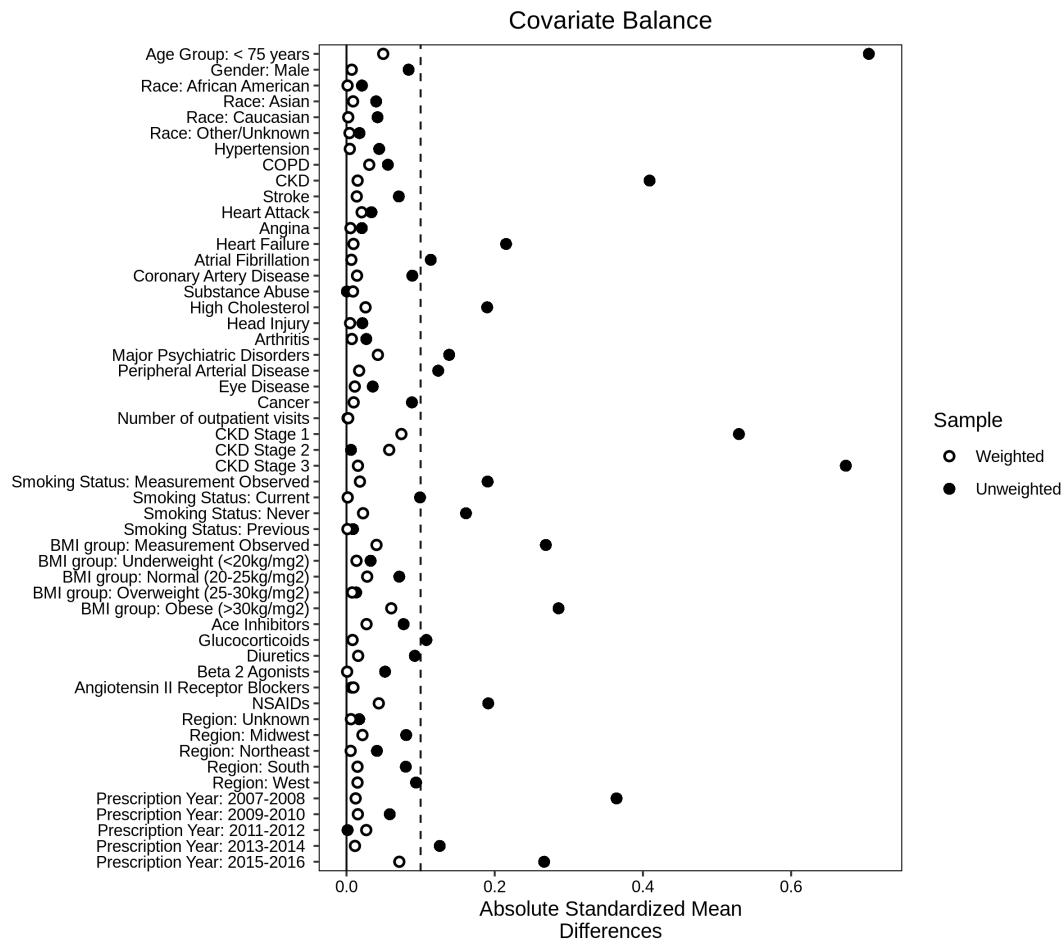

**Figure S7: Standardized difference percentage of covariates before and after IPTW for patients with HbA1c values less than 7%. Dotted line indicates SMD cut off at 0.1 (10%) where >0.1 indicates difference in covariates between the metformin and sulfonylurea users.**

SUPPORTING INFORMATION Newby 2022 Metformin versus sulfonylureas on Dementia and Parkinson's risk

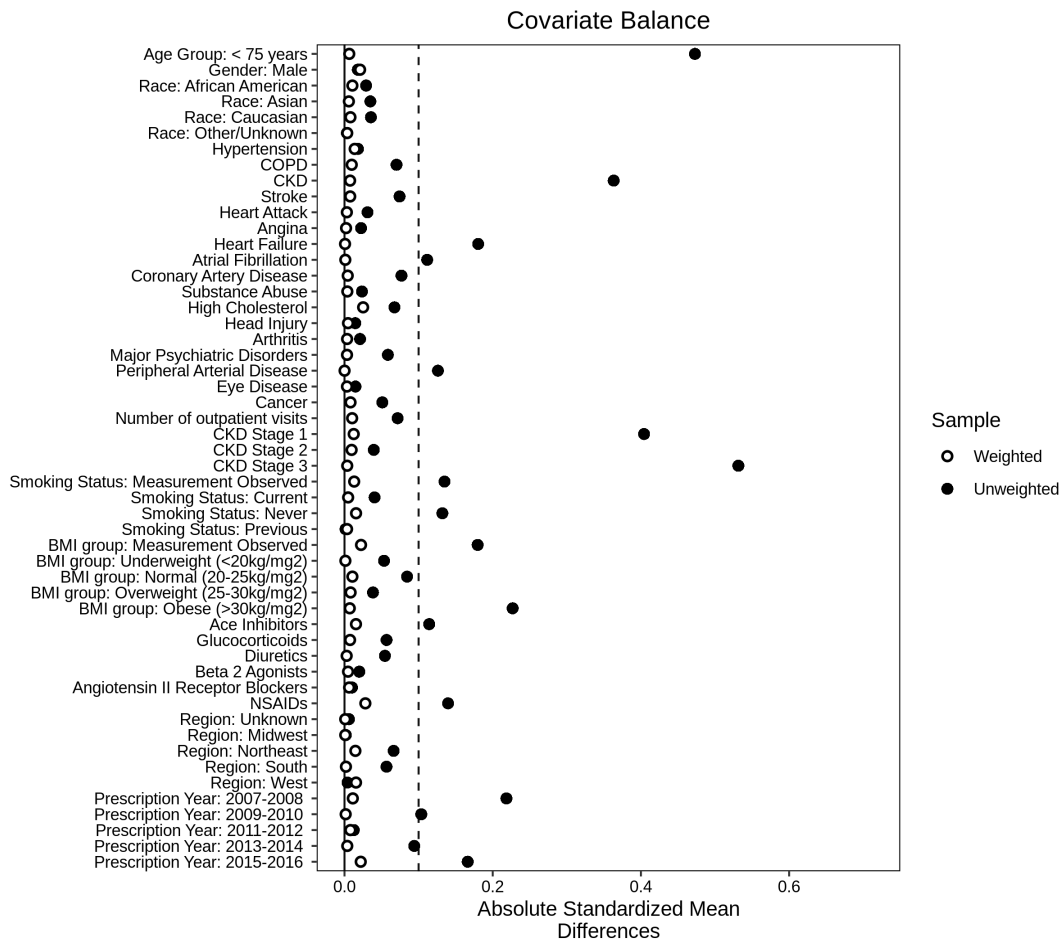

**Figure S8: Standardized difference percentage of covariates before and after IPTW for patients with HbA1c values equal of greater than 7%. Dotted line indicates SMD cut off at 0.1 (10%) where >0.1 indicates difference in covariates between the metformin and sulfonylurea users.**

SUPPORTING INFORMATION Newby 2022 Metformin versus sulfonylureas on Dementia and Parkinson's risk

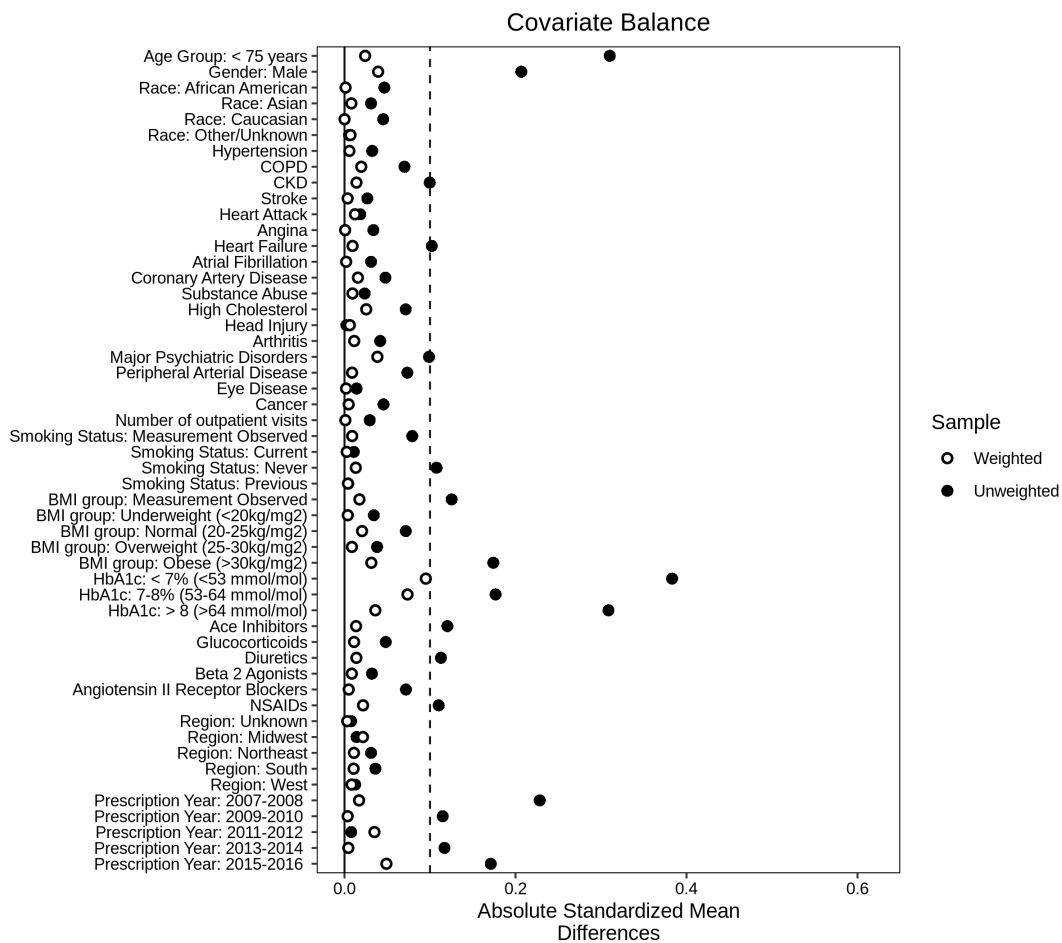

**Figure S9: Standardized difference percentage of covariates before and after IPTW for patients with normal kidney function (eGFR  $\geq 90$  mL/min/1.73 m<sup>2</sup>). Dotted line indicates SMD cut off at 0.1 (10%) where  $>0.1$  indicates difference in covariates between the metformin and sulfonylurea users.**

## SUPPORTING INFORMATION Newby 2022 Metformin versus sulfonylureas on Dementia and Parkinson's risk

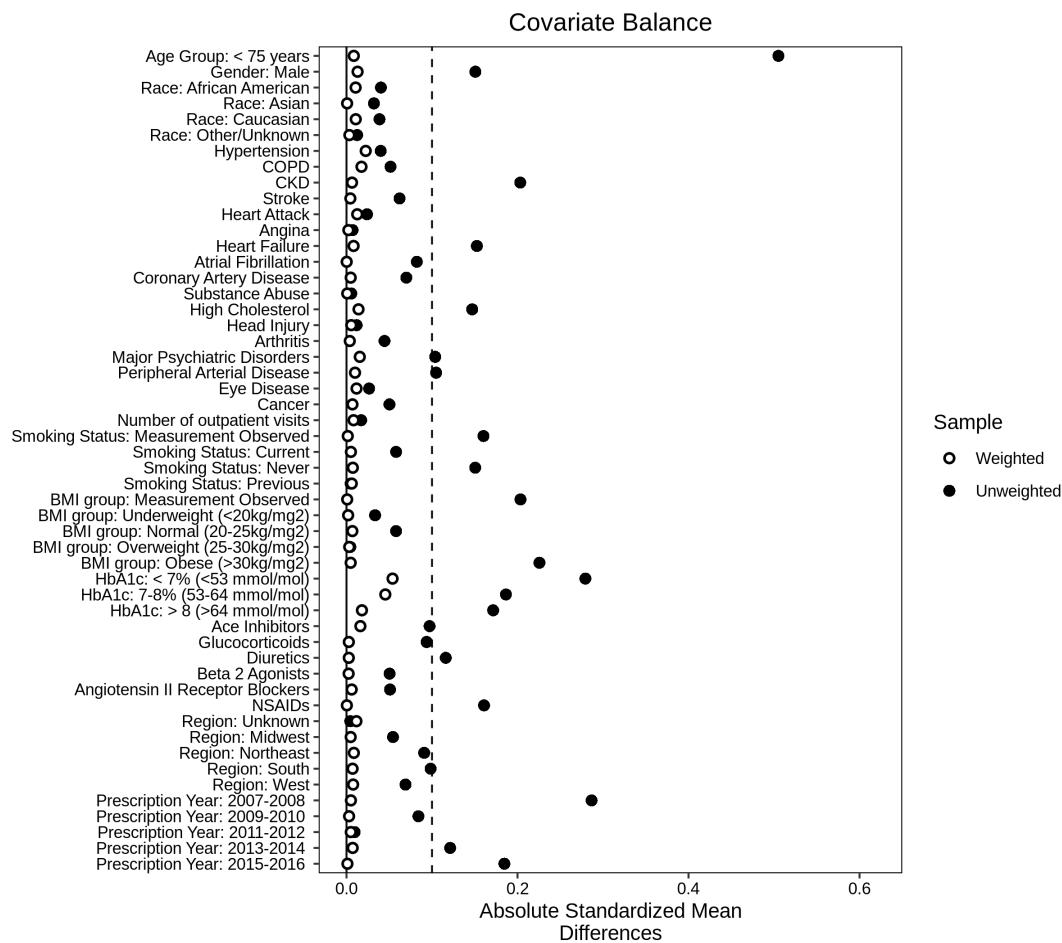

**Figure S10: Standardized difference percentage of covariates before and after IPTW for patients with moderate kidney function (eGFR 60-89 mL/min/1.73 m<sup>2</sup>). Dotted line indicates SMD cut off at 0.1 (10%) where >0.1 indicates difference in covariates between the metformin and sulfonylurea users.**



SUPPORTING INFORMATION Newby 2022 Metformin versus sulfonylureas on Dementia and Parkinson's risk

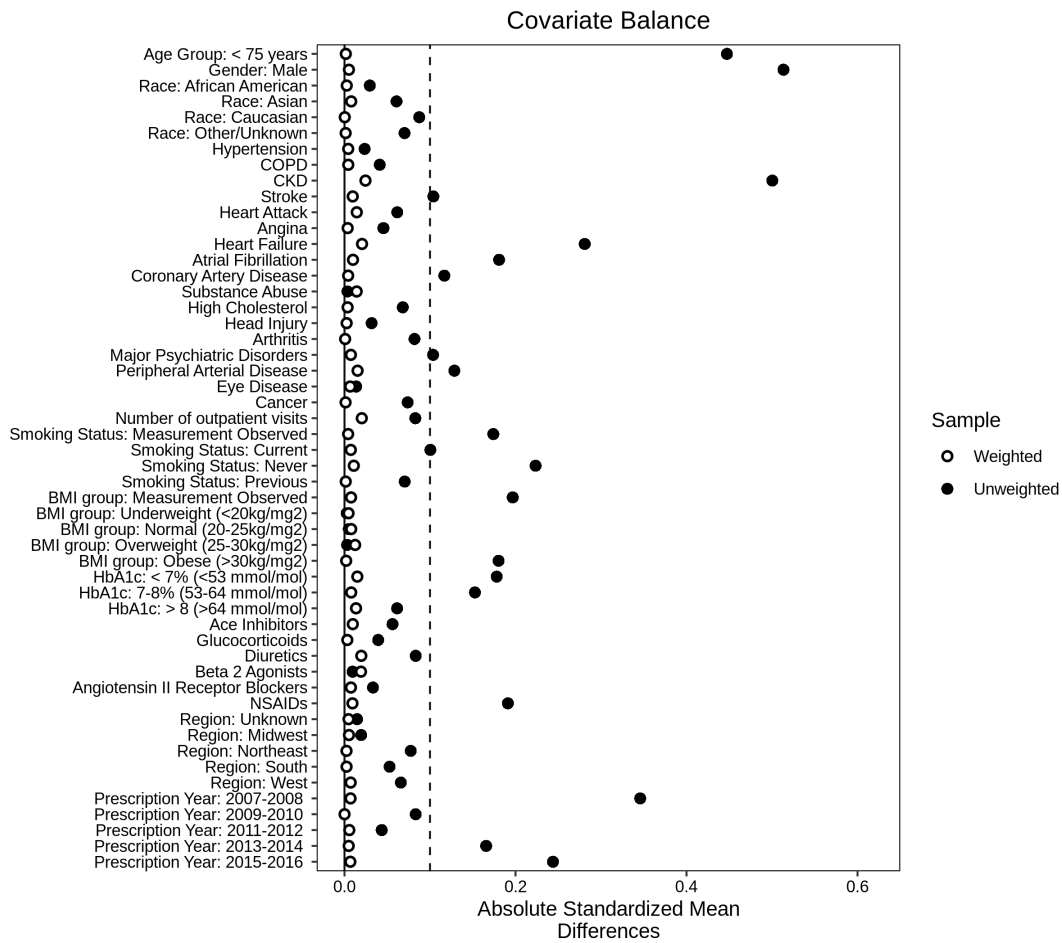

**Figure S11: Standardized difference percentage of covariates before and after IPTW for patients with poor kidney function (eGFR 30-59 mL/min/1.73 m<sup>2</sup>). Dotted line indicates SMD cut off at 0.1 (10%) where >0.1 indicates difference in covariates between the metformin and sulfonylurea users.**

SUPPORTING INFORMATION Newby 2022 Metformin versus sulfonylureas on Dementia and Parkinson's risk

### Unadjusted results

**Table S4: Unadjusted and IPTW hazard ratios from Cox regression models comparing first users of metformin versus first users of sulfonylureas for whole population over 50 with type 2 diabetes for primary and secondary outcomes**

| Outcome                   | Metformin (Event/Total) | Sulfonylureas (Event/Total) | Unadjusted HR (95% CI) | IPTW HR (95% CI) |
|---------------------------|-------------------------|-----------------------------|------------------------|------------------|
| <i>Primary Outcomes</i>   |                         |                             |                        |                  |
| All Cause Dementia        | 2256/96140              | 951/16451                   | 0.44 (0.41-0.48)       | 0.80 (0.73-0.88) |
| Parkinson's Disease       | 625/96140               | 135/16451                   | 0.88 (0.73-1.06)       | 1.00 (0.79-1.28) |
| <i>Secondary Outcomes</i> |                         |                             |                        |                  |
| Alzheimer's Disease       | 754/94638               | 337/15837                   | 0.41 (0.36-0.47)       | 0.81 (0.70-0.94) |
| Vascular Dementia         | 349/94233               | 154/15654                   | 0.42 (0.35-0.51)       | 0.79 (0.63-1.00) |
| Mild Cognitive Impairment | 1414/93986              | 401/15612                   | 0.65 (0.58-0.72)       | 0.91 (0.79-1.04) |

HR: Hazard ratio, CI: confidence interval, IPTW: inverse probability treatment weighting Event equals numbers of outcome events in each drug group (metformin and sulfonylurea). Total indicates total number of patients in each group.

**Table S5: Unadjusted and IPTW Cox regression models comparing first users of metformin versus first users of sulfonylureas for age stratified analysis (75 years) with type 2 diabetes either first users for primary and secondary outcomes**

| Outcome                   | Age Group | Metformin (Event/Total) | Sulfonylureas (Event/Total) | Unadjusted HR (95% CI) | IPTW HR (95% CI) |
|---------------------------|-----------|-------------------------|-----------------------------|------------------------|------------------|
| <i>Primary Outcomes</i>   |           |                         |                             |                        |                  |
| All Cause Dementia        | < 75      | 1049/81258              | 215/9690                    | 0.64 (0.55-0.74)       | 0.75 (0.63-0.89) |
|                           | ≥ 75      | 1207/14882              | 736/6761                    | 0.82 (0.75-0.90)       | 0.88 (0.80-0.98) |
| Parkinson's Disease       | < 75      | 438/81258               | 66/9690                     | 0.87 (0.67-1.13)       | 0.86 (0.63-1.17) |
|                           | ≥ 75      | 187/14882               | 69/6761                     | 1.37 (1.04-1.81)       | 1.40 (1.00-1.95) |
| <i>Secondary Outcomes</i> |           |                         |                             |                        |                  |
| Alzheimer's Disease       | < 75      | 294/80503               | 64/9539                     | 0.60 (0.46-0.79)       | 0.80 (0.58-1.09) |
|                           | ≥ 75      | 460/14135               | 273/6298                    | 0.84 (0.72-0.97)       | 0.86 (0.73-1.02) |
| Vascular Dementia         | < 75      | 174/80383               | 42/9517                     | 0.54 (0.39-0.76)       | 0.75 (0.51-1.10) |
|                           | ≥ 75      | 175/13850               | 112/6137                    | 0.78 (0.62-0.99)       | 0.87 (0.67-1.14) |
| Mild Cognitive Impairment | < 75      | 874/80146               | 144/9487                    | 0.79 (0.66-0.94)       | 0.87 (0.71-1.06) |
|                           | ≥ 75      | 540/13840               | 257/6125                    | 1.05 (0.90-1.22)       | 0.97 (0.83-1.15) |

HR: Hazard ratio, CI: confidence interval, IPTW: inverse probability treatment weighting Event equals numbers of outcome events in each drug group (metformin and sulfonylurea). Total indicates total number of patients in each group.

## SUPPORTING INFORMATION Newby 2022 Metformin versus sulfonylureas on Dementia and Parkinson's risk

**Table S6: Unadjusted and IPTW Cox regression models for whole population comparing first users of metformin versus first users of sulfonylureas stratified by race, renal function and HbA1c levels**

| Outcome                   | Group            | Metformin (Event/Total) | Sulfonylureas (Event/Total) | Unadjusted HR (95% CI) | IPTW HR (95% CI)  |
|---------------------------|------------------|-------------------------|-----------------------------|------------------------|-------------------|
| <i>Race</i>               |                  |                         |                             |                        |                   |
| All Cause Dementia        | Caucasian        | 1918/79693              | 841/13853                   | 0.43 (0.40-0.47)       | 0.79 (0.71-0.87)  |
|                           | African American | 210/9659                | 66/1535                     | 0.55 (0.41-0.72)       | 0.86 (0.62-1.19)  |
|                           | Asian            | 39/2394                 | 10/328                      | 0.57 (0.28-1.14)       | 1.12 (0.47-2.66)  |
|                           | Other/Unknown    | 89/4394                 | 34/735                      | 0.50 (0.34-0.74)       | 0.95 (0.59-1.53)  |
| Parkinson's Disease       | Caucasian        | 580/79693               | 120/13853                   | 0.93 (0.77-1.14)       | 1.06 (0.82-1.37)  |
|                           | African American | 22/9659                 | 7/1535                      | 0.54 (0.23-1.26)       | 0.64 (0.23-1.75)  |
|                           | Asian            | 7/2394                  | 2/328                       | 0.49 (0.10-2.38)       | 0.47 (0.09-2.49)  |
|                           | Other/Unknown    | 16/4394                 | 6/735                       | 0.50 (0.20-1.29)       | 0.53 (0.17-1.65)  |
| Alzheimer's Disease       | Caucasian        | 641/78416               | 300/13312                   | 0.40 (0.35-0.46)       | 0.77 (0.65-0.90)  |
|                           | African American | 77/9526                 | 24/1493                     | 0.55 (0.35-0.87)       | 1.14 (0.68-1.92)  |
|                           | Asian            | 10/2365                 | 2/320                       | 0.71 (0.16-3.25)       | 2.47 (0.44-13.97) |
|                           | Other/Unknown    | 26/4331                 | 11/712                      | 0.46 (0.23-0.93)       | 0.96 (0.42-2.17)  |
| Vascular Dementia         | Caucasian        | 284/78059               | 130/13142                   | 0.41 (0.33-0.50)       | 0.81 (0.63-1.03)  |
|                           | African American | 46/9495                 | 19/1488                     | 0.42 (0.24-0.71)       | 0.69 (0.36-1.29)  |
|                           | Asian*           | 7/2362                  | 0/318                       | -                      | -                 |
|                           | Other/Unknown    | 12/4317                 | 5/706                       | 0.45 (0.16-1.27)       | 0.86 (0.25-2.98)  |
| Mild Cognitive Impairment | Caucasian        | 1215/77876              | 364/13123                   | 0.62 (0.55-0.70)       | 0.90 (0.78-1.04)  |
|                           | African American | 129/9447                | 27/1467                     | 0.81 (0.53-1.22)       | 0.81 (0.48-1.34)  |
|                           | Asian            | 27/2356                 | 4/320                       | 0.97 (0.34-2.76)       | 0.71 (0.20-2.56)  |
|                           | Other/Unknown    | 43/4307                 | 6/702                       | 1.41 (0.60-3.32)       | 2.09 (0.77-5.67)  |
| <i>Renal Function</i>     |                  |                         |                             |                        |                   |
| All Cause Dementia        | Normal           | 618/46980               | 122/4464                    | 0.53 (0.44-0.64)       | 0.83 (0.66-1.05)  |
|                           | Moderate         | 1441/44276              | 505/7708                    | 0.54 (0.49-0.60)       | 0.80 (0.71-0.90)  |
|                           | Poor             | 197/4884                | 324/4279                    | 0.59 (0.50-0.71)       | 0.82 (0.66-1.02)  |
| Parkinson's Disease       | Normal           | 242/46980               | 27/4464                     | 0.94 (0.63-1.40)       | 0.94 (0.61-1.47)  |
|                           | Moderate         | 345/44276               | 68/7708                     | 0.98 (0.75-1.27)       | 1.05 (0.77-1.43)  |
|                           | Poor             | 38/4884                 | 40/4279                     | 0.94 (0.60-1.47)       | 1.16 (0.71-1.90)  |
| Alzheimer's Disease       | Normal           | 194/46556               | 39/4381                     | 0.52 (0.37-0.74)       | 0.91 (0.61-1.36)  |
|                           | Moderate         | 496/43331               | 189/7392                    | 0.49 (0.41-0.58)       | 0.82 (0.68-0.98)  |
|                           | Poor             | 64/4751                 | 109/4064                    | 0.57 (0.42-0.78)       | 0.70 (0.49-1.01)  |
| Vascular Dementia         | Normal           | 95/46457                | 16/4358                     | 0.62 (0.37-1.06)       | 1.01 (0.54-1.87)  |
|                           | Moderate         | 223/43058               | 71/7274                     | 0.59 (0.45-0.77)       | 0.81 (0.60-1.09)  |
|                           | Poor             | 31/4718                 | 67/4022                     | 0.45 (0.29-0.69)       | 0.59 (0.35-0.99)  |
| Mild Cognitive Impairment | Normal           | 491/46321               | 63/4353                     | 0.81 (0.62-1.05)       | 0.96 (0.71-1.30)  |
|                           | Moderate         | 827/42968               | 209/7256                    | 0.74 (0.64-0.86)       | 0.89 (0.75-1.06)  |
|                           | Poor             | 96/4697                 | 129/4003                    | 0.72 (0.55-0.94)       | 0.81 (0.59-1.12)  |
| <i>HbA1c</i>              |                  |                         |                             |                        |                   |
| All Cause Dementia        | Low              | 1520/62460              | 555/8583                    | 0.42 (0.38-0.46)       | 0.78 (0.69-0.88)  |
|                           | High             | 736/33680               | 396/7868                    | 0.47 (0.42-0.54)       | 0.86 (0.75-0.98)  |
| Parkinson's Disease       | Low              | 418/62460               | 78/8583                     | 0.83 (0.65-1.06)       | 0.92 (0.67-1.26)  |
|                           | High             | 207/33680               | 57/7868                     | 0.94 (0.70-1.26)       | 1.16 (0.82-1.64)  |
| Alzheimer's Disease       | Low              | 511/61451               | 193/8221                    | 0.40 (0.34-0.47)       | 0.82 (0.67-1.00)  |
|                           | High             | 243/33187               | 144/7616                    | 0.43 (0.35-0.53)       | 0.80 (0.64-1.00)  |
| Vascular Dementia         | Low              | 237/61177               | 80/8108                     | 0.44 (0.34-0.57)       | 0.87 (0.63-1.19)  |
|                           | High             | 112/33056               | 74/7546                     | 0.39 (0.29-0.52)       | 0.67 (0.48-0.94)  |
| Mild Cognitive Impairment | Low              | 968/61041               | 235/8100                    | 0.62 (0.53-0.71)       | 0.88 (0.74-1.06)  |
|                           | High             | 446/32945               | 166/7512                    | 0.68 (0.57-0.81)       | 0.94 (0.77-1.15)  |

HR: Hazard ratio, CI: confidence interval, IPTW: inverse probability treatment weighting Event equals numbers of outcome events in each drug group (metformin and sulfonylurea). Total indicates total number of patients in each group. \* HR unable to be computed due to no outcomes in patients taking sulfonylureas.

SUPPORTING INFORMATION Newby 2022 Metformin versus sulfonylureas on Dementia and Parkinson's risk

**Kaplan–Meier plots**

Kaplan-Meier weighted by IPTW to visualise any non-proportional hazards for the whole population.

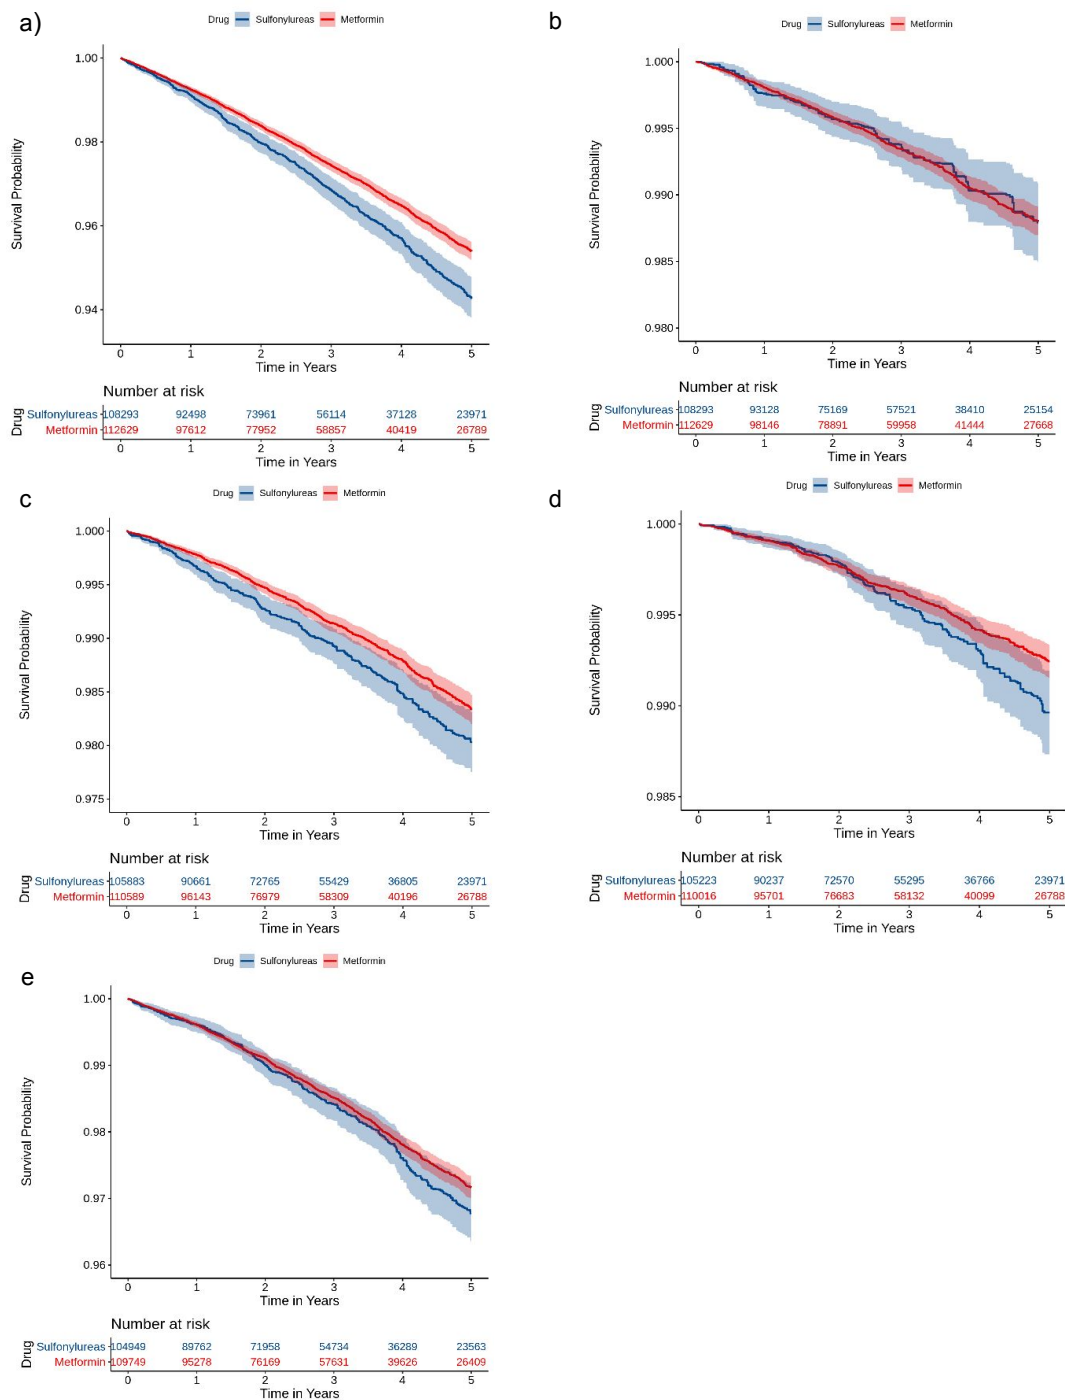

**Figure S12: Kaplan-Meier (KM) survival curves weighted by IPTW from people over 50 with type 2 diabetes from new users of metformin or sulfonylureas for a) all cause dementia b) Parkinson's disease c) Alzheimer's disease d) vascular dementia e) mild cognitive impairment**

## SUPPORTING INFORMATION Newby 2022 Metformin versus sulfonylureas on Dementia and Parkinson's risk

**Sensitivity Analysis**

This section shows the additional sensitivity analysis performed to support the main analysis in the paper.

**Time split analysis**

From the KM plots shown in Figure S12d shows the non proportionality assumption does not hold for vascular dementia. This can lead to an under or over representation of the true treatment effects. Therefore, we performed a piece wise time split analysis splitting the analysis into two time periods (0-2.5 years, 2-5 years) for vascular dementia.

**Table S7: IPTW Cox regression models comparing first users of metformin versus first users of sulfonylureas using time split piece wise analysis split at 2.5 years for vascular dementia**

| Population               | Follow up split (years) | Metformin (Event/Total) | Sulfonylureas (Event/Total) | IPTW HR (95% CI) |
|--------------------------|-------------------------|-------------------------|-----------------------------|------------------|
| Whole population         | 0-2.5                   | 349/94233               | 154/15654                   | 0.95 (0.70-1.27) |
|                          | 2.5-5                   |                         |                             | 0.64 (0.45-0.89) |
| Age: < 75 years          | 0-2.5                   | 174/80383               | 42/9517                     | 1.11 (0.62-1.99) |
|                          | 2.5-5                   |                         |                             | 0.52 (0.31-0.87) |
| Age: > 75 years          | 0-2.5                   | 175/13850               | 112/6137                    | 0.90 (0.64-1.26) |
|                          | 2.5-5                   |                         |                             | 0.84 (0.55-1.28) |
| HbA1c: < 7%              | 0-2.5                   | 237/61177               | 80/8108                     | 0.91 (0.62-1.34) |
|                          | 2.5-5                   |                         |                             | 0.70 (0.43-1.14) |
| HbA1c: > 7%              | 0-2.5                   | 112/33056               | 74/7546                     | 1.00 (0.63-1.60) |
|                          | 2.5-5                   |                         |                             | 0.57 (0.35-0.93) |
| Race: White              | 0-2.5                   | 284/78059               | 130/13142                   | 0.97 (0.71-1.32) |
|                          | 2.5-5                   |                         |                             | 0.64 (0.44-0.94) |
| Race: African American   | 0-2.5                   | 46/9495                 | 19/1488                     | 0.81 (0.31-2.15) |
|                          | 2.5-5                   |                         |                             | 0.58 (0.25-1.34) |
| Race: Asian*             | 0-2.5                   | 7/2362                  | 0/318                       | -                |
|                          | 2.5-5                   |                         |                             | -                |
| Race: Other, Unknown     | 0-2.5                   | 12/4317                 | 5/706                       | 0.88 (0.21-3.78) |
|                          | 2.5-5                   |                         |                             | 0.77 (0.08-7.66) |
| Renal function: Normal   | 0-2.5                   | 95/46457                | 16/4358                     | 1.21 (0.54-2.69) |
|                          | 2.5-5                   |                         |                             | 0.82 (0.32-2.10) |
| Renal function: Moderate | 0-2.5                   | 223/43058               | 71/7274                     | 1.07 (0.71-1.63) |
|                          | 2.5-5                   |                         |                             | 0.58 (0.38-0.88) |
| Renal function: Poor     | 0-2.5                   | 31/4718                 | 67/4022                     | 0.54 (0.25-1.17) |
|                          | 2.5-5                   |                         |                             | 0.66 (0.33-1.31) |

HR: Hazard ratio, CI: confidence interval, IPTW: inverse probability treatment weighting Event equals numbers of outcome events in each drug group (metformin and sulfonylurea). Total indicates total number of patients in each group. \* For sub analysis HR could not be calculated due to no outcomes in sulfonylurea group.

## SUPPORTING INFORMATION Newby 2022 Metformin versus sulfonylureas on Dementia and Parkinson's risk

## On treatment sensitivity analysis

In this analysis we censored patients on their last date of either metformin or sulfonylurea prescription plus 31 days if it occurred before outcome, death or loss to follow up.

**Table S8: Unadjusted and IPTW Cox regression models comparing first users of metformin versus first users of sulfonylureas for on treatment analysis for primary and secondary outcomes**

| Outcome                   | Metformin (Event/Total) | Sulfonylureas (Event/Total) | Unadjusted HR (95% CI) | IPTW HR (95% CI) |
|---------------------------|-------------------------|-----------------------------|------------------------|------------------|
| <i>Primary Outcomes</i>   |                         |                             |                        |                  |
| All Cause Dementia        | 1816/96140              | 751/16451                   | 0.41 (0.38-0.45)       | 0.75 (0.67-0.83) |
| Parkinson's Disease       | 441/96140               | 89/16451                    | 0.86 (0.69-1.08)       | 1.00 (0.75-1.33) |
| <i>Secondary Outcomes</i> |                         |                             |                        |                  |
| Alzheimer's Disease       | 580/94616               | 260/15829                   | 0.38 (0.33-0.44)       | 0.73 (0.62-0.87) |
| Vascular Dementia         | 284/94225               | 114/15651                   | 0.42 (0.34-0.52)       | 0.76 (0.58-0.98) |
| Mild Cognitive Impairment | 1145/93969              | 307/15602                   | 0.66 (0.55-0.71)       | 0.89 (0.76-1.03) |

HR: Hazard ratio, CI: confidence interval, IPTW: inverse probability treatment weighting Event equals numbers of outcome events in each drug group (metformin and sulfonylurea). Total indicates total number of patients in each group.

## Reverse causation sensitivity analysis

We removed outcome cases which occurred less than 1 year since start of follow up. For dementia this removed 828 patients and 197 PD patients. We repeated the analysis for all primary and secondary outcomes and results are presented below.

**Table S9: Unadjusted and IPTW Cox regression models comparing first users of metformin versus first users of sulfonylureas removing patients with any outcomes less than 1 year in follow up**

| Outcome                   | Metformin (Event/Total) | Sulfonylureas (Event/Total) | Unadjusted HR (95% CI) | IPTW HR (95% CI) |
|---------------------------|-------------------------|-----------------------------|------------------------|------------------|
| <i>Primary Outcomes</i>   |                         |                             |                        |                  |
| All Cause Dementia        | 1659/95543              | 710/16210                   | 0.45 (0.41-0.49)       | 0.79 (0.71-0.88) |
| Parkinson's Disease       | 466/95981               | 97/16413                    | 0.94 (0.76-1.17)       | 1.09 (0.82-1.44) |
| <i>Secondary Outcomes</i> |                         |                             |                        |                  |
| Alzheimer's Disease       | 539/94423               | 236/15736                   | 0.43 (0.37-0.50)       | 0.84 (0.70-1.01) |
| Vascular Dementia         | 266/94150               | 124/15624                   | 0.41 (0.33-0.50)       | 0.74 (0.58-0.96) |
| Mild Cognitive Impairment | 1306/93878              | 371/15582                   | 0.65 (0.58-0.73)       | 0.88 (0.77-1.02) |

HR: Hazard ratio, CI: confidence interval, IPTW: inverse probability treatment weighting Event equals numbers of outcome events in each drug group (metformin and sulfonylurea). Total indicates total number of patients in each group.

SUPPORTING INFORMATION Newby 2022 Metformin versus sulfonylureas on Dementia and Parkinson's risk

### Negative Control Outcomes

**Table S10: Negative control outcomes used with concept name and ID**

| Concept ID | Concept Name                            |
|------------|-----------------------------------------|
| 374375     | Impacted Cerumen                        |
| 377575     | Tinnitus                                |
| 4311591    | Cramp in limb                           |
| 4248728    | Snoring                                 |
| 4344500    | Impingement syndrome of shoulder region |

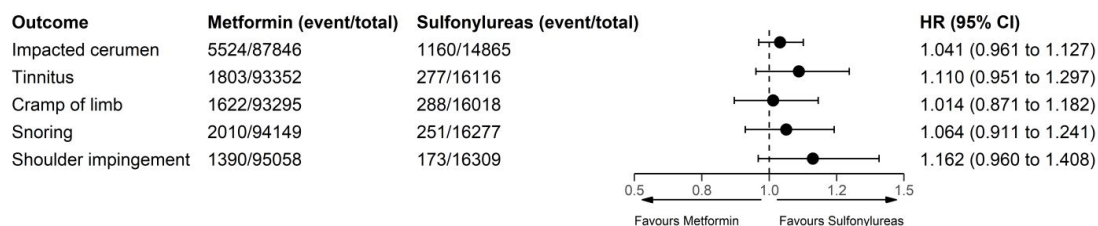

**Figure S13: Forest plot showing the hazard ratios from Cox regression using a new user cohort study design with IPTW comparing new users of metformin versus new users of sulfonylureas with negative control outcomes. HR: hazard ratio, CI confidence interval, IPTW inverse probability treatment**
